# Supplementary material for: Isolation of a Ru(iv) side-on peroxo intermediate in the water oxidation reaction
Source: Springer Nature journal article supplement (doi:10.1038/s41557-021-00702-5), 2021-05-31
Supplement: 41557_2021_702_MOESM18_ESM.cif [file 41557_2021_702_MOESM18_ESM.cif]

#######################################################################
#
#                 Cambridge Crystallographic Data Centre
#                                CCDC 
#
#######################################################################
#
# If this CIF has been generated from an entry in the Cambridge 
# Structural Database, then it will include bibliographic, chemical, 
# crystal, experimental, refinement or atomic coordinate data resulting 
# from the CCDC's data processing and validation procedures.
#
#######################################################################


data_mo_CCS_05_020b_0m
 
_audit_creation_method            'SHELXL-2014/7'
_shelx_SHELXL_version_number      '2014/7'
_chemical_name_systematic         ?
_chemical_name_common             ?
_chemical_melting_point           ?
_chemical_formula_moiety          ?
_chemical_formula_sum
 'C19 H27 F12 N5 O2 P2 Ru' 
_chemical_formula_weight          748.46
loop_
 _atom_type_symbol
 _atom_type_description
 _atom_type_scat_dispersion_real
 _atom_type_scat_dispersion_imag
 _atom_type_scat_source
 'C'  'C'   0.0033   0.0016
 'International Tables Vol C Tables 4.2.6.8 and 6.1.1.4'
 'H'  'H'   0.0000   0.0000
 'International Tables Vol C Tables 4.2.6.8 and 6.1.1.4'
 'N'  'N'   0.0061   0.0033
 'International Tables Vol C Tables 4.2.6.8 and 6.1.1.4'
 'O'  'O'   0.0106   0.0060
 'International Tables Vol C Tables 4.2.6.8 and 6.1.1.4'
 'F'  'F'   0.0171   0.0103
 'International Tables Vol C Tables 4.2.6.8 and 6.1.1.4'
 'P'  'P'   0.1023   0.0942
 'International Tables Vol C Tables 4.2.6.8 and 6.1.1.4'
 'Ru'  'Ru'  -1.2594   0.8363
 'International Tables Vol C Tables 4.2.6.8 and 6.1.1.4'
 
_symmetry_cell_setting            Trigonal  
_space_group_IT_number            145
_symmetry_space_group_name_H-M    P3(2) 
_space_group_name_Hall            'P 32'
 
_shelx_space_group_comment
;
The symmetry employed for this shelxl refinement is uniquely defined
by the following loop, which should always be used as a source of
symmetry information in preference to the above space-group names.
They are only intended as comments.
;
 
loop_
 _space_group_symop_operation_xyz
 'x, y, z'
 '-y, x-y, z+2/3'
 '-x+y, -x, z+1/3'
 
_cell_length_a                    10.8154(9)
_cell_length_b                    10.8154(9)
_cell_length_c                    19.1658(13)
_cell_angle_alpha                 90
_cell_angle_beta                  90
_cell_angle_gamma                 120
_cell_volume                      1941.5(3)
_cell_formula_units_Z             3
_cell_measurement_temperature     100(2)
_cell_measurement_reflns_used      3980
_cell_measurement_theta_min        2.17
_cell_measurement_theta_max       23.21
 
_exptl_crystal_description        needle 
_exptl_crystal_colour             yellow 
_exptl_crystal_density_meas       ?
_exptl_crystal_density_method     ?
_exptl_crystal_density_diffrn     1.920          
_exptl_crystal_F_000              1122
_exptl_transmission_factor_min    ?
_exptl_transmission_factor_max    ?
_exptl_crystal_size_max           0.20
_exptl_crystal_size_mid           0.03
_exptl_crystal_size_min           0.03
_exptl_absorpt_coefficient_mu     0.846
_shelx_estimated_absorpt_T_min    0.849
_shelx_estimated_absorpt_T_max    0.975
_exptl_absorpt_correction_type    empirical
_exptl_absorpt_correction_T_min   0.738
_exptl_absorpt_correction_T_max   0.975
_exptl_absorpt_process_details     
; 
 SADABS Version 2008/1 Bruker-Nonius
 Blessing, Acta Cryst. (1995) A51 33-38
; 
_exptl_special_details 
; 
 It should be noted that the esd's of the cell dimensions are probably too low;
 they should be multiplied by a factor of 2 to 10
; 
_diffrn_ambient_temperature       100(2)
_diffrn_measurement_specimen_support
                'magnetic support with MicroMount'
_diffrn_radiation_wavelength      0.71073 
_diffrn_radiation_type            MoK\a 
_diffrn_source                    'Microfocus source E025 IuS' 
_diffrn_source_type               'Bruker APEX DUO'
_diffrn_source_power              50
_diffrn_source_current            0.6
_diffrn_source_size               '0.2 mm x 0.2 mm fine focus'
_diffrn_radiation_monochromator   'Quazar MX Multilayer Optics' 
_diffrn_detector_type             '4K CCD area detector APEX II' 
_diffrn_measurement_device_type   'APEX DUO Kappa 4-axis goniometer' 
_diffrn_measurement_method         
;
 Fullsphere data collection, phi and omega scans
;
_diffrn_detector_area_resol_mean  512 
_diffrn_reflns_number             19756
_diffrn_reflns_av_unetI/netI      0.0714
_diffrn_reflns_av_R_equivalents   0.0672
_diffrn_reflns_limit_h_min        -13
_diffrn_reflns_limit_h_max        13
_diffrn_reflns_limit_k_min        -13
_diffrn_reflns_limit_k_max        10
_diffrn_reflns_limit_l_min        -23
_diffrn_reflns_limit_l_max        21
_diffrn_reflns_theta_min          2.174
_diffrn_reflns_theta_max          26.379
_diffrn_reflns_theta_full         25.242
_diffrn_measured_fraction_theta_max   1.000
_diffrn_measured_fraction_theta_full  1.000
_diffrn_reflns_Laue_measured_fraction_max    1.000
_diffrn_reflns_Laue_measured_fraction_full   1.000
_diffrn_reflns_point_group_measured_fraction_max   0.965
_diffrn_reflns_point_group_measured_fraction_full  0.974
_reflns_number_total              5126
_reflns_number_gt                 4311
_reflns_threshold_expression      'I > 2\s(I)'
_reflns_Friedel_coverage          0.930
_reflns_Friedel_fraction_max      0.930
_reflns_Friedel_fraction_full     0.947
 
_reflns_special_details
;
 Reflections were merged by SHELXL according to the crystal
 class for the calculation of statistics and refinement.

 _reflns_Friedel_fraction is defined as the number of unique
 Friedel pairs measured divided by the number that would be
 possible theoretically, ignoring centric projections and
 systematic absences.
;

_computing_data_collection        'Bruker APEX2 v2011.4-0' 
_computing_cell_refinement        'Bruker APEX2 v2011.4-0' 
_computing_data_reduction         'Bruker SAINT V7.60A' 
_computing_structure_solution     'SHELXT V2014/4 (Sheldrick 2014)' 
_computing_structure_refinement   'SHELXL-2014/7 (Sheldrick, 2014)' 
_computing_molecular_graphics
;
 SHELXle: C.B. Huebschle, G.M. Sheldrick & B. Dittrich
 J.Appl.Cryst. (2011) 44, 1281-1284.
; 
_computing_publication_material   'XCIF, SHELXL-2014/7 (Sheldrick, 2014)' 

_refine_special_details           ?
_refine_ls_structure_factor_coef  Fsqd
_refine_ls_matrix_type            full
_refine_ls_weighting_scheme       calc
_refine_ls_weighting_details
'w=1/[\s^2^(Fo^2^)+(0.0710P)^2^+0.4041P] where P=(Fo^2^+2Fc^2^)/3'
_atom_sites_solution_primary      ?
_atom_sites_solution_secondary    ?
_atom_sites_solution_hydrogens    geom
_refine_ls_hydrogen_treatment     constr
_refine_ls_extinction_method      none
_refine_ls_extinction_coef        .
_refine_ls_abs_structure_details
;
 Flack x determined using 1727 quotients [(I+)-(I-)]/[(I+)+(I-)]
 (Parsons, Flack and Wagner, Acta Cryst. B69 (2013) 249-259).
;
_chemical_absolute_configuration  ad
_refine_ls_abs_structure_Flack    -0.03(2)
_refine_ls_number_reflns          5126
_refine_ls_number_parameters      425
_refine_ls_number_restraints      292
_refine_ls_R_factor_all           0.0671
_refine_ls_R_factor_gt            0.0501
_refine_ls_wR_factor_ref          0.1222
_refine_ls_wR_factor_gt           0.1138
_refine_ls_goodness_of_fit_ref    1.044
_refine_ls_restrained_S_all       1.116
_refine_ls_shift/su_max           0.001
_refine_ls_shift/su_mean          0.000
 
loop_
 _atom_site_label
 _atom_site_type_symbol
 _atom_site_fract_x
 _atom_site_fract_y
 _atom_site_fract_z
 _atom_site_U_iso_or_equiv
 _atom_site_adp_type
 _atom_site_occupancy
 _atom_site_site_symmetry_order  
 _atom_site_calc_flag
 _atom_site_refinement_flags_posn
 _atom_site_refinement_flags_adp
 _atom_site_refinement_flags_occupancy
 _atom_site_disorder_assembly
 _atom_site_disorder_group
Ru1 Ru 0.50750(7) 0.74232(7) 0.51231(4) 0.01767(19) Uani 1 1 d . . . . .
N1 N 0.4259(9) 0.8619(9) 0.4651(4) 0.0246(19) Uani 1 1 d . . . . .
N2 N 0.6617(10) 0.9400(9) 0.5524(5) 0.028(2) Uani 1 1 d . . . . .
N3 N 0.6495(9) 0.8108(9) 0.4267(4) 0.0248(19) Uani 1 1 d . . . . .
N4 N 0.6169(10) 0.6691(9) 0.5715(4) 0.023(2) Uani 1 1 d . . . . .
N5 N 0.4031(10) 0.5699(10) 0.4407(4) 0.028(2) Uani 1 1 d . . . . .
O1 O 0.4086(8) 0.7455(8) 0.5996(4) 0.0347(18) Uani 1 1 d . . . . .
O2 O 0.3374(8) 0.6150(8) 0.5695(4) 0.0327(18) Uani 1 1 d . . . . .
C1 C 0.5114(11) 1.0149(10) 0.4917(5) 0.024(2) Uani 1 1 d . . . . .
H1A H 0.5812 1.0750 0.4556 0.029 Uiso 1 1 calc R U . . .
H1B H 0.4459 1.0526 0.4998 0.029 Uiso 1 1 calc R U . . .
C2 C 0.5898(13) 1.0245(12) 0.5586(6) 0.035(3) Uani 1 1 d . . . . .
H2A H 0.6613 1.1254 0.5684 0.042 Uiso 1 1 calc R U . . .
H2B H 0.5214 0.9880 0.5980 0.042 Uiso 1 1 calc R U . . .
C3 C 0.7891(12) 1.0134(12) 0.5020(6) 0.036(3) Uani 1 1 d . . . . .
H3A H 0.7802 1.0855 0.4740 0.043 Uiso 1 1 calc R U . . .
H3B H 0.8788 1.0634 0.5291 0.043 Uiso 1 1 calc R U . . .
C4 C 0.7955(11) 0.9083(13) 0.4547(6) 0.034(3) Uani 1 1 d . . . . .
H4A H 0.8305 0.8525 0.4804 0.041 Uiso 1 1 calc R U . . .
H4B H 0.8621 0.9585 0.4157 0.041 Uiso 1 1 calc R U . . .
C5 C 0.6029(11) 0.8887(11) 0.3754(5) 0.027(2) Uani 1 1 d . . . . .
H5A H 0.6690 0.9928 0.3795 0.032 Uiso 1 1 calc R U . . .
H5B H 0.6101 0.8598 0.3273 0.032 Uiso 1 1 calc R U . . .
C6 C 0.4527(11) 0.8580(10) 0.3879(5) 0.023(2) Uani 1 1 d . . . . .
H6A H 0.3842 0.7628 0.3689 0.027 Uiso 1 1 calc R U . . .
H6B H 0.4377 0.9299 0.3633 0.027 Uiso 1 1 calc R U . . .
C7 C 0.2719(10) 0.8018(11) 0.4764(6) 0.028(2) Uani 1 1 d . . . . .
H7A H 0.2383 0.8558 0.4490 0.042 Uiso 1 1 calc R U . . .
H7B H 0.2538 0.8080 0.5260 0.042 Uiso 1 1 calc R U . . .
H7C H 0.2209 0.7016 0.4617 0.042 Uiso 1 1 calc R U . . .
C8 C 0.7080(13) 0.9094(12) 0.6211(6) 0.036(3) Uani 1 1 d . . . . .
H8A H 0.6437 0.9073 0.6584 0.044 Uiso 1 1 calc R U . . .
H8B H 0.8059 0.9870 0.6319 0.044 Uiso 1 1 calc R U . . .
C9 C 0.7057(10) 0.7677(11) 0.6199(5) 0.026(2) Uani 1 1 d . . . . .
C10 C 0.7783(11) 0.7338(13) 0.6670(5) 0.033(3) Uani 1 1 d . . . . .
H10 H 0.8439 0.8046 0.6981 0.040 Uiso 1 1 calc R U . . .
C11 C 0.7570(11) 0.5976(13) 0.6698(5) 0.033(3) Uani 1 1 d . . . . .
H11 H 0.8040 0.5728 0.7043 0.040 Uiso 1 1 calc R U . . .
C12 C 0.6670(13) 0.4968(13) 0.6221(5) 0.034(3) Uani 1 1 d . . . . .
H12 H 0.6509 0.4021 0.6233 0.041 Uiso 1 1 calc R U . . .
C13 C 0.6008(11) 0.5371(11) 0.5727(5) 0.025(2) Uani 1 1 d . . . . .
H13 H 0.5420 0.4697 0.5385 0.030 Uiso 1 1 calc R U . . .
C14 C 0.6401(12) 0.6829(12) 0.3947(5) 0.030(3) Uani 1 1 d . . . . .
H14A H 0.6880 0.6450 0.4247 0.037 Uiso 1 1 calc R U . . .
H14B H 0.6876 0.7069 0.3486 0.037 Uiso 1 1 calc R U . . .
C15 C 0.4842(13) 0.5730(11) 0.3866(5) 0.031(3) Uani 1 1 d . . . . .
C16 C 0.4266(14) 0.4838(12) 0.3300(5) 0.036(3) Uani 1 1 d . . . . .
H16 H 0.4847 0.4900 0.2914 0.044 Uiso 1 1 calc R U . . .
C17 C 0.2815(15) 0.3844(12) 0.3306(6) 0.044(3) Uani 1 1 d . . . . .
H17 H 0.2395 0.3199 0.2927 0.053 Uiso 1 1 calc R U . . .
C18 C 0.1990(14) 0.3798(12) 0.3862(6) 0.039(3) Uani 1 1 d . . . . .
H18 H 0.0995 0.3134 0.3872 0.047 Uiso 1 1 calc R U . . .
C19 C 0.2656(13) 0.4760(11) 0.4418(7) 0.037(3) Uani 1 1 d . . . . .
H19 H 0.2100 0.4731 0.4808 0.045 Uiso 1 1 calc R U . . .
P1A P 0.8314(3) 0.4355(3) 0.43765(16) 0.0277(7) Uani 1 1 d D . . . .
F1A F 0.6743(8) 0.3636(8) 0.4666(4) 0.069(3) Uani 1 1 d D . . . .
F2A F 0.7749(8) 0.4796(8) 0.3682(3) 0.0513(19) Uani 1 1 d D . . . .
F3A F 0.9876(7) 0.5109(7) 0.4030(4) 0.0462(17) Uani 1 1 d D . . . .
F4A F 0.8880(10) 0.3971(9) 0.5017(4) 0.073(3) Uani 1 1 d D . . . .
F5A F 0.7949(7) 0.2904(6) 0.4000(3) 0.0413(17) Uani 1 1 d D . . . .
F6A F 0.8651(7) 0.5832(7) 0.4728(4) 0.0471(18) Uani 1 1 d D . . . .
P1B P 0.1819(3) 0.1111(3) 0.56094(17) 0.0334(8) Uani 1 1 d D U . . .
F1B F 0.0493(12) -0.0338(11) 0.5387(7) 0.065(4) Uani 0.55 1 d D U P A 1
F2B F 0.2573(12) 0.0134(12) 0.5813(7) 0.058(3) Uani 0.55 1 d D U P A 1
F3B F 0.3306(10) 0.2449(11) 0.5884(7) 0.067(4) Uani 0.55 1 d D U P A 1
F4B F 0.1206(13) 0.2050(12) 0.5486(8) 0.066(4) Uani 0.55 1 d D U P A 1
F5B F 0.2543(15) 0.1303(13) 0.4874(4) 0.059(3) Uani 0.55 1 d D U P A 1
F6B F 0.1261(16) 0.0828(14) 0.6406(5) 0.080(4) Uani 0.55 1 d D U P A 1
F1B' F 0.2496(16) 0.0998(17) 0.6277(7) 0.084(5) Uani 0.45 1 d D U P A 2
F2B' F 0.2899(14) 0.2815(11) 0.5560(8) 0.067(4) Uani 0.45 1 d D U P A 2
F3B' F 0.1053(14) 0.1299(15) 0.4897(6) 0.065(4) Uani 0.45 1 d D U P A 2
F4B' F 0.0604(16) -0.0519(11) 0.5604(8) 0.069(5) Uani 0.45 1 d D U P A 2
F6B' F 0.2806(17) 0.084(2) 0.5112(8) 0.097(6) Uani 0.45 1 d D U P A 2
F5B' F 0.0736(13) 0.1486(17) 0.6031(7) 0.067(6) Uani 0.45 1 d D . P A 2
 
loop_
 _atom_site_aniso_label
 _atom_site_aniso_U_11
 _atom_site_aniso_U_22
 _atom_site_aniso_U_33
 _atom_site_aniso_U_23
 _atom_site_aniso_U_13
 _atom_site_aniso_U_12
Ru1 0.0202(4) 0.0208(4) 0.0121(3) 0.0006(3) 0.0002(3) 0.0103(4)
N1 0.022(5) 0.029(5) 0.020(4) 0.004(4) -0.002(3) 0.011(4)
N2 0.033(5) 0.018(4) 0.028(5) -0.005(4) -0.014(4) 0.009(4)
N3 0.029(5) 0.033(5) 0.015(4) 0.003(4) 0.006(4) 0.017(4)
N4 0.027(5) 0.025(5) 0.018(4) 0.006(4) 0.004(4) 0.014(4)
N5 0.037(5) 0.028(5) 0.022(5) 0.003(4) -0.002(4) 0.018(4)
O1 0.043(5) 0.044(5) 0.022(4) 0.000(3) 0.005(3) 0.025(4)
O2 0.028(4) 0.040(5) 0.028(4) 0.002(3) 0.006(3) 0.015(4)
C1 0.035(6) 0.016(5) 0.025(5) -0.001(4) -0.001(4) 0.015(4)
C2 0.047(7) 0.023(6) 0.029(6) -0.004(5) -0.004(5) 0.014(6)
C3 0.029(6) 0.028(6) 0.034(6) 0.005(5) -0.007(5) 0.003(5)
C4 0.016(5) 0.042(7) 0.042(7) 0.014(5) 0.002(5) 0.013(5)
C5 0.027(5) 0.031(6) 0.025(5) 0.007(4) 0.005(4) 0.017(5)
C6 0.029(5) 0.023(5) 0.018(5) 0.001(4) -0.001(4) 0.014(4)
C7 0.021(5) 0.035(6) 0.030(6) 0.004(5) 0.003(4) 0.016(5)
C8 0.039(7) 0.027(6) 0.032(6) -0.004(5) -0.017(5) 0.008(5)
C9 0.019(5) 0.031(6) 0.017(5) 0.003(4) 0.002(4) 0.005(5)
C10 0.018(5) 0.053(7) 0.018(5) 0.005(5) -0.001(4) 0.009(5)
C11 0.031(6) 0.062(8) 0.024(6) 0.018(5) 0.011(5) 0.036(6)
C12 0.047(7) 0.047(7) 0.022(5) 0.010(5) 0.011(5) 0.035(6)
C13 0.026(5) 0.038(6) 0.022(5) 0.006(4) 0.007(4) 0.023(5)
C14 0.042(7) 0.045(7) 0.015(5) 0.008(5) 0.009(5) 0.029(6)
C15 0.057(8) 0.029(6) 0.016(5) 0.003(4) 0.001(5) 0.030(6)
C16 0.066(9) 0.038(7) 0.019(5) -0.005(5) -0.006(5) 0.036(7)
C17 0.082(10) 0.029(6) 0.034(7) -0.011(5) -0.018(6) 0.036(7)
C18 0.055(8) 0.024(6) 0.040(7) -0.003(5) -0.014(6) 0.020(6)
C19 0.049(8) 0.018(5) 0.044(7) -0.003(5) -0.010(6) 0.016(5)
P1A 0.0300(16) 0.0264(15) 0.0268(16) -0.0027(12) 0.0060(12) 0.0143(13)
F1A 0.050(5) 0.057(5) 0.079(6) -0.017(4) 0.041(4) 0.011(4)
F2A 0.061(5) 0.062(5) 0.047(4) -0.009(4) -0.015(4) 0.043(4)
F3A 0.035(4) 0.049(4) 0.051(4) -0.005(3) 0.003(3) 0.018(3)
F4A 0.126(8) 0.074(6) 0.033(4) -0.006(4) -0.010(5) 0.060(6)
F5A 0.054(4) 0.028(4) 0.043(4) -0.006(3) 0.012(3) 0.021(3)
F6A 0.048(4) 0.041(4) 0.052(5) -0.017(3) 0.003(3) 0.022(4)
P1B 0.0309(16) 0.0275(15) 0.0371(19) -0.0176(14) 0.0011(12) 0.0111(13)
F1B 0.069(7) 0.042(6) 0.083(8) -0.002(6) -0.044(6) 0.028(5)
F2B 0.050(6) 0.069(7) 0.064(7) 0.009(6) 0.004(6) 0.036(5)
F3B 0.046(6) 0.060(7) 0.075(8) -0.015(6) 0.000(6) 0.012(5)
F4B 0.055(7) 0.048(6) 0.104(9) 0.001(6) -0.006(7) 0.033(6)
F5B 0.099(8) 0.055(7) 0.035(6) 0.003(5) -0.002(6) 0.048(6)
F6B 0.086(8) 0.066(8) 0.067(7) -0.009(6) 0.034(7) 0.021(6)
F1B' 0.076(9) 0.079(9) 0.083(8) 0.004(7) -0.035(7) 0.028(7)
F2B' 0.068(8) 0.054(7) 0.049(8) -0.004(6) -0.009(7) 0.009(6)
F3B' 0.062(8) 0.066(8) 0.034(7) 0.013(6) -0.009(6) 0.007(6)
F4B' 0.074(8) 0.050(7) 0.072(9) 0.019(7) -0.047(7) 0.023(6)
F6B' 0.083(9) 0.114(10) 0.102(10) -0.038(8) 0.009(8) 0.055(7)
F5B' 0.039(10) 0.110(17) 0.048(11) -0.042(11) -0.013(8) 0.034(11)
 
_geom_special_details
;
 All esds (except the esd in the dihedral angle between two l.s. planes)
 are estimated using the full covariance matrix.  The cell esds are taken
 into account individually in the estimation of esds in distances, angles
 and torsion angles; correlations between esds in cell parameters are only
 used when they are defined by crystal symmetry.  An approximate (isotropic)
 treatment of cell esds is used for estimating esds involving l.s. planes.
;
 
loop_
 _geom_bond_atom_site_label_1
 _geom_bond_atom_site_label_2
 _geom_bond_distance
 _geom_bond_site_symmetry_2
 _geom_bond_publ_flag
Ru1 O2 1.988(7) . ?
Ru1 O1 1.995(7) . ?
Ru1 N4 2.062(9) . ?
Ru1 N2 2.092(8) . ?
Ru1 N1 2.101(8) . ?
Ru1 N3 2.112(8) . ?
Ru1 N5 2.128(9) . ?
N1 C7 1.470(12) . ?
N1 C6 1.513(13) . ?
N1 C1 1.524(13) . ?
N2 C2 1.471(14) . ?
N2 C8 1.504(13) . ?
N2 C3 1.539(15) . ?
N3 C14 1.469(13) . ?
N3 C4 1.492(13) . ?
N3 C5 1.535(12) . ?
N4 C13 1.349(13) . ?
N4 C9 1.376(13) . ?
N5 C19 1.317(14) . ?
N5 C15 1.347(14) . ?
O1 O2 1.353(10) . ?
C1 C2 1.513(15) . ?
C1 H1A 0.9900 . ?
C1 H1B 0.9900 . ?
C2 H2A 0.9900 . ?
C2 H2B 0.9900 . ?
C3 C4 1.482(17) . ?
C3 H3A 0.9900 . ?
C3 H3B 0.9900 . ?
C4 H4A 0.9900 . ?
C4 H4B 0.9900 . ?
C5 C6 1.505(13) . ?
C5 H5A 0.9900 . ?
C5 H5B 0.9900 . ?
C6 H6A 0.9900 . ?
C6 H6B 0.9900 . ?
C7 H7A 0.9800 . ?
C7 H7B 0.9800 . ?
C7 H7C 0.9800 . ?
C8 C9 1.520(16) . ?
C8 H8A 0.9900 . ?
C8 H8B 0.9900 . ?
C9 C10 1.362(15) . ?
C10 C11 1.373(16) . ?
C10 H10 0.9500 . ?
C11 C12 1.381(17) . ?
C11 H11 0.9500 . ?
C12 C13 1.383(14) . ?
C12 H12 0.9500 . ?
C13 H13 0.9500 . ?
C14 C15 1.509(16) . ?
C14 H14A 0.9900 . ?
C14 H14B 0.9900 . ?
C15 C16 1.377(15) . ?
C16 C17 1.390(18) . ?
C16 H16 0.9500 . ?
C17 C18 1.376(18) . ?
C17 H17 0.9500 . ?
C18 C19 1.409(16) . ?
C18 H18 0.9500 . ?
C19 H19 0.9500 . ?
P1A F4A 1.518(8) . ?
P1A F1A 1.575(7) . ?
P1A F5A 1.587(6) . ?
P1A F6A 1.599(6) . ?
P1A F3A 1.607(7) . ?
P1A F2A 1.633(7) . ?
P1B F4B 1.483(9) . ?
P1B F1B' 1.509(9) . ?
P1B F6B' 1.563(10) . ?
P1B F1B 1.565(8) . ?
P1B F5B 1.576(8) . ?
P1B F4B' 1.587(10) . ?
P1B F6B 1.614(8) . ?
P1B F2B' 1.617(10) . ?
P1B F3B 1.622(8) . ?
P1B F5B' 1.632(9) . ?
P1B F3B' 1.662(9) . ?
P1B F2B 1.672(8) . ?
 
loop_
 _geom_angle_atom_site_label_1
 _geom_angle_atom_site_label_2
 _geom_angle_atom_site_label_3
 _geom_angle
 _geom_angle_site_symmetry_1
 _geom_angle_site_symmetry_3
 _geom_angle_publ_flag
O2 Ru1 O1 39.7(3) . . ?
O2 Ru1 N4 86.6(3) . . ?
O1 Ru1 N4 87.7(3) . . ?
O2 Ru1 N2 119.6(3) . . ?
O1 Ru1 N2 80.5(3) . . ?
N4 Ru1 N2 82.7(3) . . ?
O2 Ru1 N1 97.8(3) . . ?
O1 Ru1 N1 87.5(3) . . ?
N4 Ru1 N1 166.4(3) . . ?
N2 Ru1 N1 83.9(3) . . ?
O2 Ru1 N3 158.5(3) . . ?
O1 Ru1 N3 161.3(3) . . ?
N4 Ru1 N3 96.1(3) . . ?
N2 Ru1 N3 81.9(4) . . ?
N1 Ru1 N3 84.6(3) . . ?
O2 Ru1 N5 81.2(3) . . ?
O1 Ru1 N5 120.1(3) . . ?
N4 Ru1 N5 100.0(3) . . ?
N2 Ru1 N5 159.2(3) . . ?
N1 Ru1 N5 93.4(3) . . ?
N3 Ru1 N5 77.3(3) . . ?
C7 N1 C6 108.8(8) . . ?
C7 N1 C1 111.7(8) . . ?
C6 N1 C1 109.7(7) . . ?
C7 N1 Ru1 113.4(6) . . ?
C6 N1 Ru1 105.0(6) . . ?
C1 N1 Ru1 108.1(6) . . ?
C2 N2 C8 113.8(9) . . ?
C2 N2 C3 110.2(8) . . ?
C8 N2 C3 110.6(9) . . ?
C2 N2 Ru1 105.4(7) . . ?
C8 N2 Ru1 106.2(6) . . ?
C3 N2 Ru1 110.3(6) . . ?
C14 N3 C4 111.5(8) . . ?
C14 N3 C5 111.2(8) . . ?
C4 N3 C5 111.3(8) . . ?
C14 N3 Ru1 107.4(6) . . ?
C4 N3 Ru1 107.2(6) . . ?
C5 N3 Ru1 108.0(6) . . ?
C13 N4 C9 118.6(9) . . ?
C13 N4 Ru1 128.3(7) . . ?
C9 N4 Ru1 112.7(7) . . ?
C19 N5 C15 120.1(10) . . ?
C19 N5 Ru1 124.4(8) . . ?
C15 N5 Ru1 114.9(8) . . ?
O2 O1 Ru1 69.8(4) . . ?
O1 O2 Ru1 70.5(4) . . ?
C2 C1 N1 111.9(8) . . ?
C2 C1 H1A 109.2 . . ?
N1 C1 H1A 109.2 . . ?
C2 C1 H1B 109.2 . . ?
N1 C1 H1B 109.2 . . ?
H1A C1 H1B 107.9 . . ?
N2 C2 C1 109.9(9) . . ?
N2 C2 H2A 109.7 . . ?
C1 C2 H2A 109.7 . . ?
N2 C2 H2B 109.7 . . ?
C1 C2 H2B 109.7 . . ?
H2A C2 H2B 108.2 . . ?
C4 C3 N2 111.2(9) . . ?
C4 C3 H3A 109.4 . . ?
N2 C3 H3A 109.4 . . ?
C4 C3 H3B 109.4 . . ?
N2 C3 H3B 109.4 . . ?
H3A C3 H3B 108.0 . . ?
C3 C4 N3 108.9(9) . . ?
C3 C4 H4A 109.9 . . ?
N3 C4 H4A 109.9 . . ?
C3 C4 H4B 109.9 . . ?
N3 C4 H4B 109.9 . . ?
H4A C4 H4B 108.3 . . ?
C6 C5 N3 113.1(8) . . ?
C6 C5 H5A 109.0 . . ?
N3 C5 H5A 109.0 . . ?
C6 C5 H5B 109.0 . . ?
N3 C5 H5B 109.0 . . ?
H5A C5 H5B 107.8 . . ?
C5 C6 N1 110.5(8) . . ?
C5 C6 H6A 109.6 . . ?
N1 C6 H6A 109.6 . . ?
C5 C6 H6B 109.6 . . ?
N1 C6 H6B 109.6 . . ?
H6A C6 H6B 108.1 . . ?
N1 C7 H7A 109.5 . . ?
N1 C7 H7B 109.5 . . ?
H7A C7 H7B 109.5 . . ?
N1 C7 H7C 109.5 . . ?
H7A C7 H7C 109.5 . . ?
H7B C7 H7C 109.5 . . ?
N2 C8 C9 111.7(9) . . ?
N2 C8 H8A 109.3 . . ?
C9 C8 H8A 109.3 . . ?
N2 C8 H8B 109.3 . . ?
C9 C8 H8B 109.3 . . ?
H8A C8 H8B 107.9 . . ?
C10 C9 N4 120.8(10) . . ?
C10 C9 C8 122.7(9) . . ?
N4 C9 C8 116.4(9) . . ?
C9 C10 C11 120.3(10) . . ?
C9 C10 H10 119.9 . . ?
C11 C10 H10 119.9 . . ?
C10 C11 C12 119.7(10) . . ?
C10 C11 H11 120.2 . . ?
C12 C11 H11 120.2 . . ?
C11 C12 C13 118.4(10) . . ?
C11 C12 H12 120.8 . . ?
C13 C12 H12 120.8 . . ?
N4 C13 C12 122.1(10) . . ?
N4 C13 H13 118.9 . . ?
C12 C13 H13 118.9 . . ?
N3 C14 C15 108.0(8) . . ?
N3 C14 H14A 110.1 . . ?
C15 C14 H14A 110.1 . . ?
N3 C14 H14B 110.1 . . ?
C15 C14 H14B 110.1 . . ?
H14A C14 H14B 108.4 . . ?
N5 C15 C16 121.9(11) . . ?
N5 C15 C14 113.4(9) . . ?
C16 C15 C14 124.7(10) . . ?
C15 C16 C17 118.4(11) . . ?
C15 C16 H16 120.8 . . ?
C17 C16 H16 120.8 . . ?
C18 C17 C16 119.7(11) . . ?
C18 C17 H17 120.2 . . ?
C16 C17 H17 120.2 . . ?
C17 C18 C19 118.5(12) . . ?
C17 C18 H18 120.8 . . ?
C19 C18 H18 120.8 . . ?
N5 C19 C18 121.4(12) . . ?
N5 C19 H19 119.3 . . ?
C18 C19 H19 119.3 . . ?
F4A P1A F1A 93.6(5) . . ?
F4A P1A F5A 91.8(4) . . ?
F1A P1A F5A 89.9(4) . . ?
F4A P1A F6A 90.6(4) . . ?
F1A P1A F6A 89.7(4) . . ?
F5A P1A F6A 177.5(4) . . ?
F4A P1A F3A 90.5(5) . . ?
F1A P1A F3A 175.9(5) . . ?
F5A P1A F3A 89.6(4) . . ?
F6A P1A F3A 90.6(4) . . ?
F4A P1A F2A 178.5(5) . . ?
F1A P1A F2A 87.9(4) . . ?
F5A P1A F2A 88.5(4) . . ?
F6A P1A F2A 89.0(4) . . ?
F3A P1A F2A 88.1(4) . . ?
F1B' P1B F6B' 95.6(7) . . ?
F4B P1B F1B 98.2(7) . . ?
F4B P1B F5B 97.5(6) . . ?
F1B P1B F5B 92.0(6) . . ?
F1B' P1B F4B' 94.6(6) . . ?
F6B' P1B F4B' 93.0(7) . . ?
F4B P1B F6B 91.7(6) . . ?
F1B P1B F6B 89.9(6) . . ?
F5B P1B F6B 170.3(7) . . ?
F1B' P1B F2B' 92.2(6) . . ?
F6B' P1B F2B' 90.3(7) . . ?
F4B' P1B F2B' 172.1(7) . . ?
F4B P1B F3B 91.4(6) . . ?
F1B P1B F3B 170.3(7) . . ?
F5B P1B F3B 88.1(6) . . ?
F6B P1B F3B 88.4(6) . . ?
F1B' P1B F5B' 92.2(7) . . ?
F6B' P1B F5B' 171.8(8) . . ?
F4B' P1B F5B' 88.9(7) . . ?
F2B' P1B F5B' 86.9(6) . . ?
F1B' P1B F3B' 176.8(8) . . ?
F6B' P1B F3B' 87.1(6) . . ?
F4B' P1B F3B' 86.8(6) . . ?
F2B' P1B F3B' 86.2(6) . . ?
F5B' P1B F3B' 85.0(6) . . ?
F4B P1B F2B 174.9(7) . . ?
F1B P1B F2B 85.6(6) . . ?
F5B P1B F2B 85.7(5) . . ?
F6B P1B F2B 85.0(6) . . ?
F3B P1B F2B 84.7(6) . . ?
 
loop_
 _geom_torsion_atom_site_label_1
 _geom_torsion_atom_site_label_2
 _geom_torsion_atom_site_label_3
 _geom_torsion_atom_site_label_4
 _geom_torsion
 _geom_torsion_site_symmetry_1
 _geom_torsion_site_symmetry_2
 _geom_torsion_site_symmetry_3
 _geom_torsion_site_symmetry_4
 _geom_torsion_publ_flag
C7 N1 C1 C2 106.2(10) . . . . ?
C6 N1 C1 C2 -133.1(9) . . . . ?
Ru1 N1 C1 C2 -19.2(10) . . . . ?
C8 N2 C2 C1 -164.1(9) . . . . ?
C3 N2 C2 C1 71.0(11) . . . . ?
Ru1 N2 C2 C1 -48.1(10) . . . . ?
N1 C1 C2 N2 46.0(12) . . . . ?
C2 N2 C3 C4 -137.3(9) . . . . ?
C8 N2 C3 C4 96.0(10) . . . . ?
Ru1 N2 C3 C4 -21.3(11) . . . . ?
N2 C3 C4 N3 45.9(12) . . . . ?
C14 N3 C4 C3 -165.1(9) . . . . ?
C5 N3 C4 C3 70.1(10) . . . . ?
Ru1 N3 C4 C3 -47.9(10) . . . . ?
C14 N3 C5 C6 100.6(10) . . . . ?
C4 N3 C5 C6 -134.4(9) . . . . ?
Ru1 N3 C5 C6 -17.0(10) . . . . ?
N3 C5 C6 N1 43.2(11) . . . . ?
C7 N1 C6 C5 -167.9(8) . . . . ?
C1 N1 C6 C5 69.7(10) . . . . ?
Ru1 N1 C6 C5 -46.2(9) . . . . ?
C2 N2 C8 C9 149.3(10) . . . . ?
C3 N2 C8 C9 -86.0(11) . . . . ?
Ru1 N2 C8 C9 33.7(11) . . . . ?
C13 N4 C9 C10 1.4(15) . . . . ?
Ru1 N4 C9 C10 175.1(8) . . . . ?
C13 N4 C9 C8 -173.8(9) . . . . ?
Ru1 N4 C9 C8 -0.2(11) . . . . ?
N2 C8 C9 C10 161.4(10) . . . . ?
N2 C8 C9 N4 -23.4(13) . . . . ?
N4 C9 C10 C11 -4.0(15) . . . . ?
C8 C9 C10 C11 170.9(10) . . . . ?
C9 C10 C11 C12 3.2(15) . . . . ?
C10 C11 C12 C13 0.1(15) . . . . ?
C9 N4 C13 C12 2.0(15) . . . . ?
Ru1 N4 C13 C12 -170.5(7) . . . . ?
C11 C12 C13 N4 -2.8(15) . . . . ?
C4 N3 C14 C15 164.2(8) . . . . ?
C5 N3 C14 C15 -70.9(10) . . . . ?
Ru1 N3 C14 C15 47.0(8) . . . . ?
C19 N5 C15 C16 2.7(16) . . . . ?
Ru1 N5 C15 C16 -168.9(8) . . . . ?
C19 N5 C15 C14 -177.9(9) . . . . ?
Ru1 N5 C15 C14 10.6(11) . . . . ?
N3 C14 C15 N5 -38.5(11) . . . . ?
N3 C14 C15 C16 140.9(10) . . . . ?
N5 C15 C16 C17 -2.5(16) . . . . ?
C14 C15 C16 C17 178.0(10) . . . . ?
C15 C16 C17 C18 1.6(16) . . . . ?
C16 C17 C18 C19 -0.8(16) . . . . ?
C15 N5 C19 C18 -1.8(16) . . . . ?
Ru1 N5 C19 C18 168.9(8) . . . . ?
C17 C18 C19 N5 0.9(16) . . . . ?
 
_refine_diff_density_max    1.235
_refine_diff_density_min   -0.705
_refine_diff_density_rms    0.122
_shelx_res_file
;
    mo_CCS_05_020b_0m.res created by SHELXL-2014/7
TITL mo_CCS_05_020b_0m_a.res in P3(2)
REM Old TITL mo_CCS_05_020b_0m in P3(1)
REM SHELXT solution in P3(2)
REM R1 0.101,  Rweak 0.035,  Alpha 0.015,  Orientation as input
REM Flack x =  0.027 ( 0.021 ) from Parsons' quotients
REM Formula found by SHELXT:  C24 N6 O2 F7 P2 Ru
CELL  0.71073  10.8154  10.8154  19.1658   90.000   90.000  120.000
ZERR    3.000   0.0009   0.0009   0.0013    0.000    0.000    0.000
LATT -1
SYMM -Y, X-Y, 2/3+Z
SYMM -X+Y, -X, 1/3+Z
SFAC C H N O F P RU
UNIT 57 81 15 6 36 6 3
TEMP -173.160
SIZE 0.03 0.03 0.20
L.S. 16
ACTA
CONF
BOND $H
LIST 6
FMAP 2
SIZE 0.03 0.20 0.20
PLAN 5
WGHT    0.071000    0.404100
FVAR       0.10635
MOLE 1
RU1   7    0.507498    0.742317    0.512310    11.00000    0.02018    0.02080 =
         0.01211    0.00057    0.00016    0.01031
N1    3    0.425879    0.861925    0.465111    11.00000    0.02234    0.02854 =
         0.02041    0.00392   -0.00217    0.01094
N2    3    0.661659    0.939955    0.552366    11.00000    0.03349    0.01818 =
         0.02848   -0.00461   -0.01361    0.00909
N3    3    0.649493    0.810790    0.426742    11.00000    0.02916    0.03262 =
         0.01489    0.00338    0.00593    0.01705
N4    3    0.616896    0.669127    0.571512    11.00000    0.02686    0.02516 =
         0.01843    0.00603    0.00414    0.01359
N5    3    0.403149    0.569882    0.440713    11.00000    0.03736    0.02812 =
         0.02219    0.00299   -0.00173    0.01821
O1    4    0.408635    0.745494    0.599630    11.00000    0.04289    0.04353 =
         0.02203    0.00043    0.00461    0.02487
O2    4    0.337380    0.615006    0.569547    11.00000    0.02825    0.04000 =
         0.02757    0.00206    0.00576    0.01542
C1    1    0.511364    1.014885    0.491680    11.00000    0.03510    0.01642 =
         0.02467   -0.00068   -0.00074    0.01495
AFIX  23
H1A   2    0.581228    1.075019    0.455622    11.00000   -1.20000
H1B   2    0.445940    1.052595    0.499845    11.00000   -1.20000
AFIX   0
C2    1    0.589810    1.024465    0.558649    11.00000    0.04685    0.02315 =
         0.02916   -0.00377   -0.00385    0.01391
AFIX  23
H2A   2    0.661275    1.125406    0.568362    11.00000   -1.20000
H2B   2    0.521374    0.988005    0.597993    11.00000   -1.20000
AFIX   0
C3    1    0.789122    1.013414    0.501970    11.00000    0.02934    0.02831 =
         0.03438    0.00461   -0.00691    0.00345
AFIX  23
H3A   2    0.780237    1.085497    0.473961    11.00000   -1.20000
H3B   2    0.878830    1.063435    0.529130    11.00000   -1.20000
AFIX   0
C4    1    0.795460    0.908297    0.454662    11.00000    0.01586    0.04218 =
         0.04197    0.01438    0.00237    0.01328
AFIX  23
H4A   2    0.830525    0.852545    0.480436    11.00000   -1.20000
H4B   2    0.862148    0.958511    0.415734    11.00000   -1.20000
AFIX   0
C5    1    0.602863    0.888669    0.375444    11.00000    0.02728    0.03125 =
         0.02471    0.00714    0.00517    0.01697
AFIX  23
H5A   2    0.669046    0.992771    0.379480    11.00000   -1.20000
H5B   2    0.610097    0.859822    0.327277    11.00000   -1.20000
AFIX   0
C6    1    0.452739    0.858029    0.387891    11.00000    0.02895    0.02334 =
         0.01786    0.00126   -0.00109    0.01417
AFIX  23
H6A   2    0.384208    0.762753    0.368886    11.00000   -1.20000
H6B   2    0.437674    0.929923    0.363293    11.00000   -1.20000
AFIX   0
C7    1    0.271919    0.801840    0.476392    11.00000    0.02124    0.03469 =
         0.03020    0.00426    0.00272    0.01572
AFIX 137
H7A   2    0.238334    0.855833    0.449014    11.00000   -1.50000
H7B   2    0.253823    0.807968    0.526021    11.00000   -1.50000
H7C   2    0.220930    0.701650    0.461665    11.00000   -1.50000
AFIX   0
C8    1    0.708027    0.909361    0.621068    11.00000    0.03923    0.02698 =
         0.03181   -0.00423   -0.01693    0.00834
AFIX  23
H8A   2    0.643732    0.907255    0.658397    11.00000   -1.20000
H8B   2    0.805885    0.987028    0.631935    11.00000   -1.20000
AFIX   0
C9    1    0.705713    0.767677    0.619886    11.00000    0.01948    0.03082 =
         0.01720    0.00275    0.00173    0.00538
C10   1    0.778283    0.733773    0.667030    11.00000    0.01756    0.05283 =
         0.01833    0.00500   -0.00094    0.00931
AFIX  43
H10   2    0.843882    0.804616    0.698148    11.00000   -1.20000
AFIX   0
C11   1    0.757030    0.597600    0.669776    11.00000    0.03108    0.06245 =
         0.02370    0.01775    0.01091    0.03627
AFIX  43
H11   2    0.804008    0.572840    0.704251    11.00000   -1.20000
AFIX   0
C12   1    0.666980    0.496815    0.622144    11.00000    0.04721    0.04726 =
         0.02179    0.01041    0.01141    0.03464
AFIX  43
H12   2    0.650924    0.402082    0.623318    11.00000   -1.20000
AFIX   0
C13   1    0.600768    0.537112    0.572714    11.00000    0.02560    0.03751 =
         0.02236    0.00625    0.00658    0.02277
AFIX  43
H13   2    0.542023    0.469658    0.538495    11.00000   -1.20000
AFIX   0
C14   1    0.640081    0.682927    0.394709    11.00000    0.04172    0.04475 =
         0.01466    0.00770    0.00932    0.02895
AFIX  23
H14A  2    0.688047    0.644986    0.424668    11.00000   -1.20000
H14B  2    0.687580    0.706941    0.348564    11.00000   -1.20000
AFIX   0
C15   1    0.484171    0.572964    0.386608    11.00000    0.05723    0.02941 =
         0.01615    0.00348    0.00054    0.02983
C16   1    0.426636    0.483793    0.329980    11.00000    0.06550    0.03796 =
         0.01899   -0.00544   -0.00617    0.03597
AFIX  43
H16   2    0.484719    0.490044    0.291434    11.00000   -1.20000
AFIX   0
C17   1    0.281510    0.384391    0.330559    11.00000    0.08165    0.02859 =
         0.03388   -0.01122   -0.01802    0.03555
AFIX  43
H17   2    0.239488    0.319905    0.292700    11.00000   -1.20000
AFIX   0
C18   1    0.199018    0.379847    0.386227    11.00000    0.05460    0.02376 =
         0.04003   -0.00281   -0.01442    0.01975
AFIX  43
H18   2    0.099456    0.313389    0.387180    11.00000   -1.20000
AFIX   0
C19   1    0.265560    0.475997    0.441785    11.00000    0.04888    0.01784 =
         0.04415   -0.00301   -0.01039    0.01580
AFIX  43
H19   2    0.210043    0.473056    0.480832    11.00000   -1.20000
AFIX   0
MOLE 2
P1A   6    0.831404    0.435456    0.437654    11.00000    0.02998    0.02641 =
         0.02683   -0.00272    0.00600    0.01427
F1A   5    0.674294    0.363611    0.466646    11.00000    0.04988    0.05699 =
         0.07872   -0.01703    0.04129    0.01063
F2A   5    0.774877    0.479646    0.368166    11.00000    0.06053    0.06206 =
         0.04736   -0.00886   -0.01512    0.04265
F3A   5    0.987555    0.510931    0.402974    11.00000    0.03482    0.04935 =
         0.05080   -0.00525    0.00287    0.01839
F4A   5    0.887994    0.397082    0.501657    11.00000    0.12602    0.07353 =
         0.03320   -0.00650   -0.00961    0.06017
F5A   5    0.794921    0.290406    0.400020    11.00000    0.05414    0.02764 =
         0.04307   -0.00555    0.01176    0.02104
F6A   5    0.865084    0.583151    0.472814    11.00000    0.04751    0.04131 =
         0.05249   -0.01703    0.00308    0.02216
MOLE 3
SAME 0.005 P1a > F6a
P1B   6    0.181900    0.111144    0.560937    11.00000    0.03090    0.02749 =
         0.03708   -0.01761    0.00115    0.01114
SIMU 0.01 P1B > F6B'
DELU 0.01 P1B > F6B'
DFIX 1.59 0.01 P1B F1B' P1B F2B' P1B F3B' P1B F4B' P1B F5B' P1B F6B'
DFIX 2.26 0.01 F1B' F2B' F2B' F3B' F3B' F4B' F4B' F1B' F1B' F5B' F2B' F5B'
DFIX 2.26 0.01 F3B' F5B' F4B' F5B' F1B' F6B' F2B' F6B' F3B' F6B' F4B' F6B'
ISOR 0.005 F1B > F6B'
PART 1 10.55
F1B   5    0.049288   -0.033794    0.538696    10.55000    0.06896    0.04184 =
         0.08309   -0.00197   -0.04431    0.02757
F2B   5    0.257329    0.013446    0.581347    10.55000    0.04987    0.06852 =
         0.06435    0.00907    0.00370    0.03574
F3B   5    0.330574    0.244860    0.588434    10.55000    0.04610    0.05968 =
         0.07482   -0.01457    0.00007    0.01184
F4B   5    0.120626    0.205017    0.548567    10.55000    0.05546    0.04806 =
         0.10365    0.00100   -0.00606    0.03320
F5B   5    0.254288    0.130298    0.487355    10.55000    0.09876    0.05521 =
         0.03523    0.00295   -0.00152    0.04820
F6B   5    0.126136    0.082783    0.640591    10.55000    0.08572    0.06572 =
         0.06656   -0.00902    0.03417    0.02089
PART 2 10.45
F1B'  5    0.249591    0.099838    0.627695    10.45000    0.07583    0.07901 =
         0.08337    0.00374   -0.03461    0.02812
F2B'  5    0.289904    0.281486    0.556048    10.45000    0.06810    0.05360 =
         0.04917   -0.00401   -0.00875    0.00873
F3B'  5    0.105287    0.129867    0.489664    10.45000    0.06197    0.06565 =
         0.03398    0.01286   -0.00903    0.00677
F4B'  5    0.060372   -0.051870    0.560438    10.45000    0.07353    0.05006 =
         0.07247    0.01906   -0.04660    0.02321
F6B'  5    0.280559    0.084267    0.511173    10.45000    0.08303    0.11444 =
         0.10219   -0.03786    0.00890    0.05499
F5B'  5    0.073562    0.148581    0.603087    10.45000    0.03937    0.10980 =
         0.04816   -0.04201   -0.01268    0.03388
PART 0
HKLF 4
REM  mo_CCS_05_020b_0m_a.res in P3(2)
REM R1 =  0.0501 for    4311 Fo > 4sig(Fo)  and  0.0671 for all    5126 data
REM    425 parameters refined using    292 restraints
END
WGHT      0.0710      0.4041
REM Highest difference peak  1.235,  deepest hole -0.705,  1-sigma level  0.122
Q1    1   0.6044  0.7540  0.5086  11.00000  0.05    1.23
Q2    1   0.5975  0.8545  0.5103  11.00000  0.05    1.00
Q3    1   0.4572  0.6402  0.5202  11.00000  0.05    0.89
Q4    1   0.1771  0.0837  0.6532  11.00000  0.05    0.77
Q5    1   0.4033  0.7029  0.5070  11.00000  0.05    0.74
;
_shelx_res_checksum   92289
_shelx_hkl_file
;
   0  -1   0  100.40    4.13
   1   0   0   98.44    4.11
   0  -1   0   96.51    4.07
   1   0   0   98.36    4.09
   1   0   0  100.53    4.08
   0  -1   0  101.18    4.19
   0   1   0   96.87    4.06
   0   1   0   99.43    4.12
  -1   0   0   99.26    4.09
   1  -1   0   98.79    4.07
  -1   0   0   98.75    4.08
  -1   0   0   99.97    4.05
  -1   0   0   98.68    4.14
   1  -2   0   44.08    1.98
   1   1   0   44.69    2.03
   1   1   0   46.49    2.08
   1   1   0   47.23    2.10
   1  -2   0   41.60    2.18
   1   1   0   44.20    2.18
  -2   1   0   42.53    2.01
  -1  -1   0   48.01    2.17
  -1   2   0   46.63    2.08
  -1  -1   0   47.01    2.35
   2  -1   0   46.09    2.18
  -1  -1   0   49.57    2.22
  -1  -1   0   47.00    2.14
   2   0   0   18.00    1.08
  -2   2   0   13.48    1.00
   2   0   0   16.88    1.01
   0  -2   0   13.52    1.22
   2   0   0   14.78    1.12
  -2   2   0   16.63    1.22
   0  -2   0   13.89    1.00
   0  -2   0   14.60    1.21
  -2   0   0   14.22    1.27
  -2   0   0   18.72    0.99
  -2   0   0   14.37    1.13
   0   2   0   14.12    1.13
  -2   0   0   16.81    1.05
   0   2   0   13.73    0.96
   2  -2   0   14.51    1.04
   1   2   0    0.84    0.69
   1   2   0    0.58    0.49
   2  -3   0    0.52    0.44
  -3   1   0    1.69    0.64
  -3   1   0    0.41    0.44
  -3   1   0    1.05    0.49
   1   2   0    0.75    0.57
   2  -3   0    1.46    0.79
   1   2   0    1.10    0.54
  -1  -2   0    2.67    0.74
   3  -1   0    1.56    0.53
  -1  -2   0    0.73    0.48
  -2   3   0    1.00    0.57
   3  -1   0    0.85    0.61
  -1  -2   0    1.40    0.57
  -1  -2   0   -0.18    0.72
   1  -3   0    5.75    1.01
   1  -3   0    4.85    0.59
   2   1   0    3.81    0.70
   2   1   0    4.74    0.67
   1  -3   0    5.31    0.83
   2   1   0    4.96    0.86
   2   1   0    5.44    0.68
  -1   3   0    5.09    0.59
  -2  -1   0    5.81    0.69
  -2  -1   0    6.69    0.68
   3  -2   0    5.97    0.72
  -2  -1   0    4.56    0.95
  -2  -1   0    4.96    0.77
  -3   3   0  146.31    6.26
   3   0   0  140.72    6.21
   3   0   0  146.49    6.31
   0  -3   0  157.41    6.25
  -3   3   0  138.14    6.42
   0  -3   0  150.69    6.43
   3   0   0  151.09    6.31
   0  -3   0  151.66    6.62
  -3   0   0  150.26    6.46
   0   3   0  156.76    6.54
   3  -3   0  153.76    6.42
  -3   0   0  154.23    6.36
  -3   0   0  150.49    6.42
  -3   0   0  149.97    6.63
   0   3   0  143.01    6.33
  -4   1   0   32.48    1.91
   3  -4   0   33.53    2.16
   1   3   0   31.48    2.04
   3  -4   0   30.37    1.70
   1   3   0   30.48    1.74
   3  -4   0   30.09    1.77
  -4   1   0   32.00    1.73
  -1  -3   0   27.91    2.16
   4  -1   0   31.70    1.88
  -1  -3   0   30.88    1.73
  -1  -3   0   31.80    1.96
   4  -1   0   32.45    1.73
   2   2   0    2.87    0.92
   2  -4   0    2.85    0.61
   2   2   0    2.74    0.68
  -4   2   0    3.64    0.83
   2  -4   0    2.21    0.97
  -4   2   0    3.30    0.65
   2   2   0    3.07    0.65
   2   2   0    3.37    0.67
  -2  -2   0    1.99    0.67
  -2  -2   0    2.05    0.98
  -2  -2   0    3.37    0.79
   4  -2   0    2.10    0.71
  -2  -2   0    2.15    0.56
   1  -4   0   12.84    1.06
   3   1   0   13.17    1.14
  -4   3   0   13.34    1.10
   1  -4   0   13.84    1.53
   3   1   0   11.08    1.00
   1  -4   0   13.44    1.29
   3   1   0    9.40    1.17
   4  -3   0   11.29    1.02
  -3  -1   0   12.85    1.16
  -3  -1   0   12.60    1.17
  -3  -1   0   10.67    1.31
  -3  -1   0   13.20    1.07
  -1   4   0   11.60    1.01
   4   0   0   78.13    3.65
   0  -4   0   85.67    3.71
   4   0   0   80.50    3.81
   0  -4   0   79.92    3.94
  -4   4   0   83.23    4.00
   0  -4   0   86.63    4.22
   4   0   0   75.00    3.77
   0   4   0   81.65    4.22
  -4   0   0   89.40    4.31
  -4   0   0   86.03    3.88
  -4   0   0   87.75    4.06
   0   4   0   86.30    3.87
   0   4   0   84.92    4.06
   4  -4   0   87.64    3.95
   1   4   0   59.64    2.79
  -5   1   0   52.73    2.89
   4  -5   0   53.76    2.78
   4  -5   0   54.90    2.74
  -5   1   0   55.65    2.73
  -1  -4   0   44.97    2.96
   5  -1   0   51.45    2.77
  -1  -4   0   54.43    2.62
  -1  -4   0   51.17    2.83
   5  -1   0   48.22    2.53
   5  -1   0   55.01    3.24
  -5   2   0    7.82    0.86
   3  -5   0    6.08    1.28
   2   3   0    8.66    0.97
   2   3   0    8.44    1.08
   2   3   0    5.72    0.90
   3  -5   0    6.56    0.80
  -5   2   0    6.78    1.03
  -2  -3   0    7.42    1.01
  -2  -3   0    9.25    1.20
  -2  -3   0    9.27    1.35
   5  -2   0    8.56    1.03
  -2  -3   0    9.70    0.96
   3   2   0    5.83    0.86
   2  -5   0    5.72    0.78
   3   2   0    5.49    0.97
   2  -5   0    5.90    1.24
   3   2   0    5.82    0.83
   5  -3   0    6.66    0.95
  -3  -2   0    5.28    0.87
  -2   5   0    5.11    0.71
  -3  -2   0    4.22    0.72
  -3  -2   0    4.93    1.00
  -3  -2   0    5.64    1.18
   4   1   0   12.02    1.20
   1  -5   0   11.99    1.07
   1  -5   0   10.57    1.29
   1  -5   0   11.44    1.59
  -1   5   0   12.45    1.12
   5  -4   0   10.36    1.06
  -4  -1   0   12.75    1.56
  -4  -1   0   11.66    1.10
  -4  -1   0   11.19    1.32
  -4  -1   0   14.26    1.25
   0  -5   0   80.98    4.19
   0  -5   0   87.51    3.89
   5   0   0   82.42    4.04
   0  -5   0   78.39    4.41
  -5   0   0   84.77    3.83
  -5   0   0   79.78    4.03
  -5   0   0   80.83    4.32
   5  -5   0   81.03    3.92
   0   5   0   83.63    3.81
   5  -6   0    6.13    0.90
  -6   1   0    6.01    0.92
   1   5   0    6.12    0.96
  -6   1   0    5.72    1.13
   5  -6   0    7.01    0.99
  -6   1   0    6.17    1.35
  -1  -5   0    5.34    1.41
  -1  -5   0    5.70    1.16
  -1  -5   0    6.98    0.94
   6  -1   0    3.14    0.91
  -6   2   0    0.73    0.66
   4  -6   0    1.30    1.10
  -6   2   0    1.80    0.94
   2   4   0    1.22    0.73
   4  -6   0    1.40    0.65
   4  -6   0    1.60    0.73
  -2  -4   0    2.43    0.96
  -2  -4   0    1.50    0.66
  -2  -4   0    0.78    1.03
   6  -2   0    0.42    0.81
   3  -6   0   72.05    3.26
  -6   3   0   64.84    3.24
  -6   3   0   65.84    3.45
   3  -6   0   66.37    3.78
   3   3   0   63.95    3.31
  -3  -3   0   68.06    3.37
   6  -3   0   67.07    3.47
  -3  -3   0   61.45    3.75
  -3  -3   0   72.07    3.59
   2  -6   0    6.07    1.41
   2  -6   0    7.56    0.92
   4   2   0    6.11    0.95
  -4  -2   0    6.04    1.10
  -4  -2   0    6.02    0.92
  -4  -2   0    8.40    1.50
  -2   6   0    6.71    0.85
  -4  -2   0    8.67    1.05
   6  -4   0    6.05    1.07
   1  -6   0    2.45    0.98
   5   1   0    3.57    0.83
   1  -6   0    3.62    0.84
   5   1   0    4.71    1.01
   1  -6   0    3.35    1.22
  -5  -1   0    3.13    1.24
   6  -5   0    3.25    0.89
  -5  -1   0    5.57    1.12
  -1   6   0    3.67    0.74
  -5  -1   0    5.04    0.89
   0  -6   0   14.19    1.35
   0  -6   0   16.87    2.04
   0  -6   0   15.48    1.70
   6   0   0   14.41    1.54
   6   0   0   12.66    1.28
  -6   0   0   14.80    1.55
  -6   0   0   12.84    1.79
   6  -6   0   14.14    1.41
  -6   0   0   14.57    1.34
   0   6   0   12.45    1.22
  -7   1   0    8.37    1.12
  -7   1   0    6.46    1.29
   6  -7   0    6.22    0.98
  -7   1   0    6.39    1.56
   1   6   0    6.84    1.06
   6  -7   0    7.35    1.10
  -1  -6   0    8.78    1.49
   7  -1   0    8.23    1.29
  -1  -6   0   10.10    1.86
  -1  -6   0    9.01    1.17
   7  -1   0    7.20    1.06
  -7   2   0   25.34    1.75
   2   5   0   22.85    1.82
   5  -7   0   25.49    1.89
   5  -7   0   26.09    1.76
  -7   2   0   22.36    2.01
   5  -7   0   22.15    2.23
  -2  -5   0   22.50    2.06
  -2  -5   0   18.82    1.57
  -2  -5   0   24.74    2.42
   7  -2   0   27.33    2.17
  -7   3   0   13.52    1.27
   4  -7   0   15.77    1.92
   3   4   0   16.02    1.50
   4  -7   0   15.42    1.34
  -7   3   0   14.00    1.61
   7  -3   0   14.99    1.59
  -3  -4   0   14.52    1.59
  -3  -4   0   17.17    1.47
  -3  -4   0   13.65    1.93
  -7   4   0  109.07    5.04
   3  -7   0  103.71    5.58
   4   3   0  108.35    5.14
  -7   4   0  112.14    5.32
   3  -7   0  115.56    5.08
  -4  -3   0  114.63    5.83
   7  -4   0  115.70    5.33
  -4  -3   0  108.63    5.19
  -4  -3   0  109.59    5.41
   5   2   0   33.89    2.35
   2  -7   0   39.38    2.22
   2  -7   0   32.85    2.85
   2  -7   0   33.14    2.52
  -5  -2   0   39.98    2.45
  -5  -2   0   35.15    2.96
   7  -5   0   38.38    2.58
  -5  -2   0   42.19    2.68
  -2   7   0   41.23    2.25
   1  -7   0    8.17    1.45
   1  -7   0    5.57    0.98
   6   1   0    3.12    1.09
   1  -7   0    6.36    1.63
   7  -6   0    3.55    1.01
  -6  -1   0    5.41    1.19
  -6  -1   0    5.17    1.06
  -6  -1   0    5.36    1.48
  -1   7   0    4.23    0.83
   7   0   0   25.51    2.31
   0  -7   0   29.41    1.93
   0  -7   0   24.82    2.42
   0  -7   0   19.53    2.37
   0   7   0   25.91    1.88
  -7   0   0   27.07    2.04
   7  -7   0   28.64    2.20
  -7   0   0   23.28    2.19
  -7   0   0   24.16    2.57
  -8   1   0   52.74    3.84
   7  -8   0   55.31    3.23
  -8   1   0   54.31    3.46
   1   7   0   52.49    3.07
  -8   1   0   56.35    3.07
  -1  -7   0   52.49    3.93
   8  -1   0   56.55    3.45
  -1  -7   0   47.40    3.37
   6  -8   0   63.52    3.25
   2   6   0   60.39    3.32
   6  -8   0   61.04    3.36
  -8   2   0   61.65    3.65
  -8   2   0   57.53    3.18
  -2  -6   0   57.38    3.62
  -2  -6   0   55.80    3.18
  -2  -6   0   59.49    4.05
   8  -2   0   64.26    3.54
   3   5   0    1.57    0.94
   5  -8   0    1.04    1.39
   5  -8   0    1.53    0.94
  -8   3   0    0.76    0.83
  -8   3   0    1.10    1.12
   5  -8   0    3.04    0.85
  -3  -5   0    1.41    1.09
   8  -3   0    0.75    1.10
  -3  -5   0    1.46    0.84
  -3  -5   0    0.58    1.40
  -8   4   0  131.00    6.02
  -8   4   0  132.88    6.40
   4  -8   0  134.29    6.06
   4  -8   0  128.99    6.76
   4   4   0  139.76    6.24
  -4  -4   0  133.04    6.32
   8  -4   0  127.92    6.19
  -8   5   0   46.98    3.01
  -8   5   0   44.51    2.70
   5   3   0   44.44    2.79
   3  -8   0   43.80    2.59
   3  -8   0   40.66    3.34
  -5  -3   0   42.12    2.66
   8  -5   0   46.42    2.88
  -5  -3   0   42.80    3.36
  -5  -3   0   40.54    2.90
   6   2   0    9.86    1.49
   2  -8   0    8.49    1.21
   2  -8   0    7.14    1.74
  -6  -2   0    7.65    1.28
  -2   8   0   10.30    1.15
   8  -6   0    7.43    1.28
  -6  -2   0   11.70    1.96
  -6  -2   0   11.00    1.62
   1  -8   0   45.00    3.54
   7   1   0   40.93    2.87
   1  -8   0   45.16    2.63
   1  -8   0   37.67    3.09
   8  -7   0   42.14    2.80
  -7  -1   0   36.72    3.29
  -7  -1   0   40.23    2.92
  -7  -1   0   39.84    2.62
  -1   8   0   40.51    2.45
   0  -8   0   15.11    2.07
   0  -8   0   16.42    2.47
   8   0   0   19.87    2.08
  -8   0   0   16.08    2.34
   0   8   0   18.16    1.67
  -8   0   0   15.72    2.01
   8  -8   0   17.41    1.81
  -8   0   0   18.66    1.74
   8  -9   0    6.09    1.41
  -9   1   0    4.07    1.53
  -9   1   0    4.92    1.21
   1   8   0    6.78    1.29
  -9   1   0    5.44    1.94
   9  -1   0    5.26    1.46
  -1  -8   0    5.56    2.00
  -1  -8   0    5.48    1.65
   2   7   0   19.18    1.78
  -9   2   0   13.94    2.27
  -9   2   0   19.87    1.76
  -9   2   0   14.99    1.99
   7  -9   0   16.47    1.77
  -2  -7   0   17.85    2.62
   9  -2   0   19.01    2.11
  -2  -7   0   17.86    2.23
  -9   3   0    4.98    1.07
   6  -9   0    3.77    1.14
   3   6   0    4.23    1.16
  -9   3   0    3.72    1.44
   9  -3   0    5.50    1.50
  -3  -6   0    5.59    1.49
  -3  -6   0    5.55    1.81
   4   5   0    1.02    1.02
   5  -9   0    2.90    1.61
   5  -9   0    3.02    1.10
  -9   4   0    2.15    0.92
   5  -9   0    1.01    0.95
  -9   4   0    2.18    1.43
  -4  -5   0    2.98    1.65
   9  -4   0    2.54    1.20
  -4  -5   0    1.74    1.27
   4  -9   0    7.49    1.89
  -9   5   0    7.56    1.26
  -9   5   0    7.91    1.64
   5   4   0    6.38    1.37
   4  -9   0    7.58    1.26
  -5  -4   0    8.98    1.61
   9  -5   0    8.04    1.48
  -5  -4   0    5.71    1.77
   6   3   0    2.05    1.14
   3  -9   0    3.54    1.68
  -9   6   0    1.30    1.08
  -9   6   0    1.09    1.36
  -6  -3   0    2.35    1.13
  -6  -3   0    2.95    1.32
   9  -6   0    2.27    1.20
  -6  -3   0    2.07    1.62
   7   2   0    6.68    1.49
   2  -9   0    7.60    1.90
  -7  -2   0    4.72    1.28
  -2   9   0    7.14    1.24
   9  -7   0    6.42    1.50
  -7  -2   0    6.52    1.96
  -7  -2   0    6.17    1.56
   8   1   0    4.98    1.42
   1  -9   0    3.93    1.56
   1  -9   0    4.87    1.94
  -8  -1   0    3.55    1.21
   9  -8   0    1.78    1.23
  -8  -1   0    4.07    1.45
  -8  -1   0    2.86    1.80
   0  -9   0    4.83    2.07
   0  -9   0    8.13    1.86
   9   0   0    6.41    1.67
  -9   0   0    7.12    1.37
  -9   0   0    9.98    2.13
  -9   0   0    4.74    1.66
   9  -9   0    8.32    1.56
 -10   1   0    2.18    1.15
 -10   1   0    4.17    1.66
   9 -10   0    5.03    1.52
 -10   1   0    3.19    1.89
  -1  -9   0    3.77    2.05
  -1  -9   0    2.56    1.61
  10  -1   0    5.58    1.70
   8 -10   0    4.60    1.42
 -10   2   0    2.46    1.89
 -10   2   0    2.37    1.54
 -10   2   0    4.36    1.17
  -2  -8   0    4.37    2.09
  -2  -8   0    3.05    1.55
  10  -2   0    6.96    1.71
 -10   3   0    5.48    1.23
 -10   3   0    4.50    1.90
   7 -10   0    6.25    1.41
 -10   3   0    3.28    1.56
   3   7   0    7.35    1.42
  -3  -7   0    4.49    1.58
  10  -3   0    2.76    1.45
  -3  -7   0    3.67    1.98
 -10   4   0   11.30    2.02
   4   6   0   13.45    1.66
   6 -10   0   15.82    1.70
   6 -10   0   10.32    2.18
 -10   4   0   11.67    1.45
  -4  -6   0   12.11    2.39
  10  -4   0   13.58    1.99
  -4  -6   0   10.34    1.89
   5   5   0    2.24    1.15
   5 -10   0    1.99    1.63
 -10   5   0    4.24    1.63
 -10   5   0    1.74    1.01
  -5  -5   0    1.90    1.75
  10  -5   0    2.45    1.37
  -5  -5   0    1.04    1.23
 -10   6   0    0.45    1.02
   6   4   0    0.42    1.19
   4 -10   0    0.94    1.66
 -10   6   0   -0.07    1.42
  -6  -4   0   -0.12    1.29
  -6  -4   0    2.10    1.64
  10  -6   0    0.19    1.19
   3 -10   0    5.69    2.01
   7   3   0    2.94    1.30
 -10   7   0    7.02    1.44
 -10   7   0    6.77    1.77
  -7  -3   0    5.28    1.56
  10  -7   0    7.88    1.64
  -7  -3   0    5.13    2.00
  -7  -3   0    6.04    1.36
   2 -10   0    4.32    1.93
   8   2   0    1.04    1.30
  -8  -2   0    3.18    1.56
  10  -8   0    3.47    1.47
  -8  -2   0    3.38    1.25
  -8  -2   0    3.95    2.01
   1 -10   0   -0.37    1.40
   1 -10   0    0.99    1.81
   9   1   0    1.36    1.35
  -9  -1   0   -0.57    1.13
  -9  -1   0   -0.75    1.78
  10  -9   0    2.84    1.42
  -9  -1   0    0.71    1.43
   0 -10   0    3.88    2.17
   0 -10   0    3.25    1.72
  10   0   0    2.77    1.60
 -10   0   0    1.78    1.63
 -10   0   0    5.05    1.38
  10 -10   0    4.95    1.56
 -10   0   0    1.81    2.07
 -11   1   0   13.43    2.69
 -11   1   0   13.85    2.36
  10 -11   0   14.37    2.05
  -1 -10   0   12.98    2.80
  11  -1   0   15.31    2.12
  -1 -10   0   13.00    2.36
 -11   2   0    4.86    2.23
 -11   2   0    3.08    1.67
   9 -11   0    6.50    1.62
  -2  -9   0    5.22    2.34
  11  -2   0    4.55    1.71
  -2  -9   0    4.76    1.73
   8 -11   0    0.52    1.31
 -11   3   0   -1.11    1.76
 -11   3   0    0.49    1.57
  -3  -8   0   -0.49    1.99
  11  -3   0   -0.22    1.40
  -3  -8   0   -0.37    1.43
 -11   4   0   32.36    3.05
   7 -11   0   36.23    2.90
  -4  -7   0   33.33    3.60
  11  -4   0   28.58    2.72
  -4  -7   0   28.30    2.89
   6 -11   0    8.32    2.32
   5   6   0   14.17    1.85
 -11   5   0   14.30    2.25
   6 -11   0   13.10    1.79
  -5  -6   0   11.49    2.00
  -5  -6   0   11.26    2.59
  11  -5   0    9.14    1.88
 -11   6   0    7.72    1.96
   6   5   0    5.75    1.46
   5 -11   0    5.62    2.11
  -6  -5   0    2.87    1.53
  11  -6   0    3.92    1.60
  -6  -5   0    4.86    2.13
   4 -11   0   21.02    3.03
 -11   7   0   26.20    2.94
   7   4   0   28.57    2.60
  11  -7   0   30.39    2.76
  -7  -4   0   20.67    2.60
  -7  -4   0   24.30    3.18
   3 -11   0   32.23    3.71
 -11   8   0   51.38    3.88
   8   3   0   42.29    3.35
  -8  -3   0   40.86    3.45
  -8  -3   0   34.33    3.86
  11  -8   0   39.28    3.42
   2 -11   0   20.92    3.09
   9   2   0   18.09    2.31
  -9  -2   0   15.99    1.98
  -9  -2   0   18.25    3.05
  11  -9   0   17.45    2.22
  -9  -2   0   15.44    2.34
  10   1   0    3.35    1.60
   1 -11   0    1.74    1.80
   1 -11   0    4.24    2.32
  11 -10   0   -0.48    1.53
 -10  -1   0    4.12    2.39
 -10  -1   0    4.27    1.82
 -10  -1   0    5.90    1.50
   0 -11   0   22.47    2.96
   0 -11   0   21.96    3.43
  11   0   0   16.56    2.32
 -11   0   0   16.61    2.73
  11 -11   0   17.16    2.25
 -11   0   0   20.82    3.31
  11 -12   0   18.67    2.40
 -12   1   0   19.77    2.94
 -12   1   0   15.56    3.29
  12  -1   0   18.87    2.60
  -1 -11   0   18.29    2.81
  -1 -11   0   22.72    3.71
 -12   2   0    3.74    2.33
  10 -12   0    7.09    1.84
 -12   2   0    5.89    2.13
  12  -2   0    7.28    1.98
  -2 -10   0    7.87    2.66
  -2 -10   0   10.57    2.27
 -12   3   0    3.26    1.85
   9 -12   0    1.81    1.47
 -12   3   0    2.38    2.42
  -3  -9   0    4.49    2.37
  -3  -9   0    5.17    1.92
  12  -3   0    0.06    1.72
 -12   4   0    7.28    2.08
 -12   4   0    4.96    2.24
   8 -12   0   10.25    1.76
  12  -4   0    8.09    1.94
  -4  -8   0    9.68    2.77
  -4  -8   0    7.51    2.08
   7 -12   0    9.84    1.75
 -12   5   0   10.88    2.22
  12  -5   0   12.27    2.08
  -5  -7   0    8.71    2.05
  -5  -7   0   10.36    2.61
   6 -12   0    3.51    1.39
 -12   6   0    0.56    1.80
   6 -12   0    3.09    2.15
  -6  -6   0    2.57    2.21
  -6  -6   0    3.48    1.78
  12  -6   0   -1.24    1.51
   7   5   0    4.08    2.48
 -12   7   0   -1.29    1.77
   5 -12   0   -0.29    1.91
  -7  -5   0    2.16    2.15
  12  -7   0    1.47    1.66
  -7  -5   0    1.24    1.62
   8   4   0   10.78    2.09
   4 -12   0    4.56    2.31
 -12   8   0   11.36    2.39
  12  -8   0    6.71    1.88
  -8  -4   0    8.56    2.56
  -8  -4   0    8.47    2.13
 -12   9   0    7.41    2.32
   3 -12   0    7.62    2.45
   9   3   0    8.93    1.95
  -9  -3   0    3.28    2.49
  12  -9   0    8.97    2.02
  -9  -3   0    7.04    2.06
   2 -12   0    2.84    2.33
  10   2   0    4.17    1.79
 -10  -2   0    2.16    2.30
 -10  -2   0    1.06    1.84
  12 -10   0    2.74    1.73
  11   1   0    0.35    1.75
   1 -12   0   -3.70    2.06
  12 -11   0    1.21    1.70
 -11  -1   0    3.12    2.62
 -11  -1   0    1.21    1.99
 -13   4   0   -1.45    2.25
 -13   4   0    2.75    2.07
   9 -13   0    1.25    1.52
  13  -4   0   -0.57    1.68
  -4  -9   0    2.97    1.98
  -4  -9   0    0.00    2.35
   8 -13   0    2.62    1.60
 -13   5   0    0.25    2.27
 -13   5   0    4.17    2.08
  -5  -8   0    1.18    1.70
  13  -5   0    4.74    2.01
  -5  -8   0    3.30    2.48
 -13   6   0    3.44    2.05
   7 -13   0    3.89    1.59
  13  -6   0    4.14    1.93
  -6  -7   0    4.21    1.88
  -6  -7   0    2.17    2.39
 -13   7   0    0.52    2.02
   6 -13   0    1.96    1.43
   6 -13   0    3.86    2.46
  13  -7   0    0.00    1.71
  -7  -6   0    4.39    2.57
  -7  -6   0    0.77    1.73
 -13   8   0    0.90    2.08
   5 -13   0   -0.33    2.00
  -8  -5   0   -1.81    2.05
  13  -8   0    0.45    1.70
  -8  -5   0    0.48    1.73
 -13   9   0    0.96    2.12
   4 -13   0    1.10    2.37
  13  -9   0   -3.00    1.61
  -9  -4   0   -2.52    2.10
  -9  -4   0   -1.63    1.70
   0   0  -1    0.05    0.06
   0   0   1    0.02    0.02
  -1   0  -1  105.48    4.66
   0   1  -1  116.40    4.73
   0   1  -1  112.54    4.65
  -1   0  -1  113.69    4.64
   0   1  -1  117.49    4.67
  -1   0  -1  112.22    4.66
   1  -1  -1  111.66    4.59
  -1   0  -1  109.91    4.67
   0  -1   1  118.86    4.78
   1   0   1  114.89    4.75
   0  -1   1  116.30    4.84
   1   0   1  111.60    4.77
  -1   1   1  113.56    4.70
   0  -1   1  116.73    4.78
   1   0  -1   55.90    2.29
   0  -1  -1   52.55    2.40
   1   0  -1   54.30    2.31
   0  -1  -1   52.12    2.35
   0  -1  -1   55.56    2.32
   0  -1  -1   50.48    2.23
  -1   1  -1   54.71    2.36
   1   0  -1   54.99    2.24
  -1   0   1   54.72    2.30
   0   1   1   50.72    2.24
   0   1   1   49.03    2.34
  -1   0   1   56.51    2.33
   0   1   1   51.42    2.39
   1  -1   1   57.25    2.37
  -1   0   1   58.61    2.25
   1  -1   1   54.84    2.36
  -1   2  -1   44.65    2.02
  -1   2  -1   46.41    2.20
  -1  -1  -1   42.38    1.96
  -1  -1  -1   41.98    2.17
  -1  -1  -1   42.95    2.06
   2  -1  -1   43.55    2.01
  -1  -1  -1   41.34    2.08
   1   1   1   44.04    2.20
   1   1   1   42.99    2.01
   1  -2   1   47.09    2.09
   1  -2   1   47.14    2.27
   1   1   1   43.32    2.10
   3  -2  -1    9.80    0.83
  -2  -1  -1    9.51    0.87
  -2  -1  -1    8.25    0.93
  -2  -1  -1    8.85    1.11
  -1   3  -1    9.70    0.97
  -2  -1  -1    7.50    0.72
  -1   3  -1    8.95    0.80
  -1   3  -1    7.66    0.99
   1  -3   1    7.52    1.09
   2   1   1    8.56    0.81
   1  -3   1    6.96    0.93
   2   1   1    6.91    0.97
   2   1   1    7.18    0.82
   1  -3   1    7.84    0.77
   2   1   1    6.90    0.80
  -3   2   1    8.08    0.71
   0   2  -1  130.00    5.61
   2  -2  -1  132.59    5.38
  -2   0  -1  127.76    5.44
  -2   0  -1  134.49    5.51
   0   2  -1  128.08    5.42
  -2   0  -1  124.47    5.43
   0   2  -1  132.07    5.50
  -2   0  -1  122.90    5.53
   0  -2   1  130.97    5.45
   2   0   1  125.12    5.38
   2   0   1  127.41    5.38
  -2   2   1  121.24    5.30
   2   0   1  123.59    5.41
   0  -2   1  131.28    5.38
   0  -2   1  134.19    5.59
   1  -2  -1  895.78   37.35
   1   1  -1  886.70   37.56
   1  -2  -1  916.00   37.58
  -2   1  -1  937.19   37.49
   1   1  -1  956.67   37.44
   1   1  -1  959.80   37.48
   1   1  -1  945.21   37.48
   1  -2  -1  935.52   37.52
  -1  -1   1 1000.00   38.74
  -1   2   1  915.88   38.82
  -1  -1   1  974.49   38.86
   2  -1   1  983.26   38.76
  -1   2   1  926.46   38.76
  -1   2   1  938.65   38.69
  -1  -1   1  984.41   38.74
  -2   2  -1   51.99    2.48
   0  -2  -1   51.83    2.37
   2   0  -1   54.35    2.37
   2   0  -1   47.25    2.22
   0  -2  -1   50.88    2.45
   0  -2  -1   49.45    2.24
   2   0  -1   50.87    2.35
   0  -2  -1   52.68    2.60
  -2   0   1   51.37    2.32
   2  -2   1   53.88    2.40
   0   2   1   49.03    2.51
   0   2   1   46.70    2.19
  -2   0   1   49.28    2.33
  -2   0   1   53.40    2.54
  -2   0   1   50.57    2.21
  -1  -2  -1   42.63    2.47
   3  -1  -1   48.79    2.27
  -1  -2  -1   45.02    2.25
  -1  -2  -1   45.88    2.40
   3  -1  -1   44.40    2.07
  -1  -2  -1   46.36    2.13
  -2   3  -1   44.36    2.40
   2  -3   1   49.15    2.57
   1   2   1   46.44    2.53
  -3   1   1   44.04    2.14
   1   2   1   49.32    2.25
  -3   1   1   49.70    2.27
  -3   1   1   50.73    2.37
   2  -3   1   49.02    2.30
   1   2   1   47.47    2.32
  -2  -2  -1   24.26    1.88
  -2  -2  -1   23.51    1.52
  -2  -2  -1   22.84    1.40
  -2   4  -1   21.91    1.38
  -2  -2  -1   21.11    1.67
   4  -2  -1   23.54    1.56
   2  -4   1   20.29    1.36
   2   2   1   21.63    1.37
   2   2   1   17.19    1.33
   2   2   1   22.23    1.69
  -4   2   1   21.46    1.22
  -4   2   1   19.07    1.47
   2  -4   1   18.35    1.73
  -3  -2  -1   67.47    3.68
  -3  -2  -1   64.33    3.46
  -3  -2  -1   68.56    3.34
  -2   5  -1   71.09    3.25
   5  -3  -1   69.99    3.35
  -3  -2  -1   68.74    3.26
   3   2   1   66.53    3.20
   2  -5   1   71.69    3.20
   3   2   1   64.37    3.49
   3   2   1   62.09    3.17
   2  -5   1   63.88    3.62
  -3  -1  -1   25.44    1.53
   4  -3  -1   22.86    1.51
  -3  -1  -1   22.84    1.67
  -1   4  -1   21.50    1.41
  -3  -1  -1   19.62    1.75
  -3  -1  -1   22.64    1.42
   3   1   1   22.73    1.73
   3   1   1   22.37    1.49
   3   1   1   23.28    1.54
   1  -4   1   22.59    1.93
  -4   3   1   22.69    1.42
   1  -4   1   22.39    1.74
   1  -4   1   24.42    1.51
  -3   0  -1   31.27    1.75
  -3   0  -1   31.89    1.86
   3  -3  -1   30.59    1.68
  -3   0  -1   30.88    1.68
   0   3  -1   29.67    1.82
   0   3  -1   29.44    1.67
  -3   0  -1   32.25    2.05
   0  -3   1   32.82    1.85
   0  -3   1   27.10    1.96
   3   0   1   32.05    1.79
   0  -3   1   32.38    1.73
   3   0   1   28.30    1.66
  -3   3   1   29.65    1.61
   3   0   1   28.65    1.75
   2  -3  -1   29.32    1.88
  -3   1  -1   30.05    1.79
   1   2  -1   28.25    1.61
   1   2  -1   32.67    1.73
  -3   1  -1   28.32    1.64
  -3   1  -1   28.92    1.63
   1   2  -1   29.11    1.58
   3  -1   1   32.66    1.76
  -1  -2   1   31.95    1.80
  -1  -2   1   29.24    1.95
  -1  -2   1   30.44    1.67
  -2   3   1   30.29    1.79
   2   1  -1    3.00    0.65
   1  -3  -1    3.24    0.93
   2   1  -1    2.49    0.55
   1  -3  -1    2.57    0.47
   1  -3  -1    1.83    0.71
   2   1  -1    2.94    0.58
  -2  -1   1    3.55    0.70
  -2  -1   1    3.27    0.83
  -1   3   1    2.79    0.71
  -2  -1   1    4.09    0.63
  -2  -1   1    5.52    0.62
  -1   3   1    3.82    0.66
  -1   3   1    3.36    0.45
   3  -2   1    5.30    0.75
  -1   3   1    3.16    0.82
   0  -3  -1   55.56    2.55
   0  -3  -1   57.51    3.02
   3   0  -1   52.49    2.52
   0  -3  -1   57.72    2.85
  -3   3  -1   56.30    2.83
   3   0  -1   56.59    2.70
   3   0  -1   56.05    2.67
  -3   0   1   60.89    3.02
  -3   0   1   57.33    2.70
   0   3   1   50.86    2.89
   0   3   1   55.73    2.57
  -3   0   1   59.44    2.59
  -3   0   1   58.20    2.75
   3  -3   1   57.71    2.75
  -1  -3  -1    0.08    0.91
   4  -1  -1   -0.55    0.54
   4  -1  -1    0.78    0.56
  -1  -3  -1    0.34    0.48
  -1  -3  -1    0.96    0.74
  -3   4  -1    0.36    0.56
  -1  -3  -1    0.17    0.63
   4  -1  -1    0.59    0.48
   1   3   1    0.63    0.51
   1   3   1   -0.03    0.40
   3  -4   1    0.28    0.86
   1   3   1    0.51    0.82
   3  -4   1    0.79    0.62
  -4   1   1    1.28    0.70
  -4   1   1   -0.28    0.33
   1   3   1    0.03    0.39
   3  -4   1    0.57    0.53
  -4   1   1    0.32    0.46
  -2  -3  -1   38.55    2.39
   5  -2  -1   42.47    2.33
  -2  -3  -1   39.77    2.14
  -2  -3  -1   40.25    2.63
  -2  -3  -1   42.02    2.28
  -5   2   1   40.07    2.32
   2   3   1   42.24    2.19
   3  -5   1   42.08    2.17
  -5   2   1   38.21    2.01
   2   3   1   39.14    2.74
   2   3   1   38.88    2.21
   3  -5   1   39.05    2.58
  -3  -3  -1   64.90    3.45
  -3  -3  -1   63.68    3.14
   6  -3  -1   67.67    3.32
  -3  -3  -1   57.81    3.20
  -3  -3  -1   66.12    3.72
  -6   3   1   67.29    3.27
   3  -6   1   73.56    3.44
   3  -6   1   72.47    3.94
   3   3   1   71.60    3.45
  -6   3   1   66.79    3.57
   7  -4  -1    5.26    1.16
  -4  -3  -1    5.19    1.49
  -4  -3  -1    4.05    1.15
  -4  -3  -1    4.80    1.10
  -4  -3  -1    4.14    0.81
  -3   7  -1    4.52    0.81
  -7   4   1    3.98    1.13
   4   3   1    3.02    0.91
   3  -7   1    3.62    0.89
  -7   4   1    4.85    0.89
   3  -7   1    3.85    1.34
  -2   6  -1   12.95    1.20
  -4  -2  -1   14.85    1.57
  -4  -2  -1   15.28    1.34
  -4  -2  -1   13.82    1.38
  -4  -2  -1   16.23    1.85
   6  -4  -1   13.40    1.37
   4   2   1   14.16    1.29
   2  -6   1   10.02    1.56
   2  -6   1   15.67    1.39
  -4  -1  -1   23.11    1.80
  -4  -1  -1   21.42    1.57
  -1   5  -1   20.16    1.46
  -4  -1  -1   19.56    1.89
   5  -4  -1   21.88    1.58
   1  -5   1   24.13    1.60
   1  -5   1   20.37    1.78
   1  -5   1   23.50    2.12
   4   1   1   19.34    1.49
   4   1   1   21.03    1.66
  -4   0  -1    9.84    1.15
   4  -4  -1   13.92    1.11
  -4   0  -1   13.28    1.11
   0   4  -1   11.24    1.11
   0   4  -1   13.03    1.27
  -4   0  -1   12.23    1.42
   0   4  -1   11.45    1.04
   4   0   1   12.27    1.22
   0  -4   1   13.65    1.16
   4   0   1   12.97    1.11
   0  -4   1   13.54    1.38
   0  -4   1   17.77    1.73
  -4   4   1   10.67    1.00
   4   0   1   12.71    1.17
  -1  -3   1   50.85    2.82
   4  -1   1   44.22    2.49
  -1  -3   1   49.24    2.40
  -1  -3   1   46.61    2.54
   4  -1   1   46.01    2.37
   2  -4  -1   78.52    3.47
   2  -4  -1   80.89    3.95
   2   2  -1   79.35    3.64
  -4   2  -1   80.40    3.63
  -4   2  -1   78.86    3.75
   2   2  -1   82.34    3.69
   2   2  -1   75.71    3.56
  -2  -2   1   82.37    3.70
  -2  -2   1   82.33    4.08
  -2  -2   1   81.33    3.83
  -2  -2   1   80.95    3.74
  -2   4   1   83.65    3.90
   4  -2   1   84.55    3.84
   3   1  -1   11.26    1.05
   3   1  -1   10.26    1.20
   3   1  -1   11.94    1.07
   1  -4  -1   12.81    1.24
   3   1  -1   13.90    1.08
   1  -4  -1   11.55    1.39
   1  -4  -1   12.26    1.00
  -3  -1   1   12.27    1.10
   4  -3   1   14.38    1.30
  -3  -1   1   12.02    1.11
  -3  -1   1   13.20    1.43
  -1   4   1   12.28    1.33
  -1   4   1   14.18    1.21
  -3  -1   1   14.78    1.21
  -1   4   1   13.51    0.98
   0  -4  -1   12.66    1.55
   4   0  -1    8.27    0.85
   4   0  -1   11.54    1.13
  -4   4  -1   11.08    1.23
   0  -4  -1   10.29    0.92
   0  -4  -1   10.19    1.23
  -4   0   1    8.87    1.03
  -4   0   1   10.59    0.90
  -4   0   1   10.59    1.36
   0   4   1   10.05    1.35
  -4   0   1    7.79    0.87
   4  -4   1    9.05    1.02
   0   4   1   10.18    0.87
   5  -1  -1   29.07    1.90
   5  -1  -1   27.70    1.69
   5  -1  -1   28.96    1.95
  -1  -4  -1   30.56    2.35
  -1  -4  -1   30.13    1.74
  -1  -4  -1   29.06    2.08
   1   4   1   29.63    1.78
   4  -5   1   31.29    1.88
  -5   1   1   32.50    2.03
   4  -5   1   31.95    1.98
  -5   1   1   29.27    1.71
   4  -5   1   34.33    2.32
  -2  -4  -1   56.95    2.85
  -2  -4  -1   54.56    3.11
  -2  -4  -1   61.72    3.52
   6  -2  -1   58.82    3.08
  -2  -4  -1   51.85    2.93
  -6   2   1   54.98    2.76
  -6   2   1   56.11    3.07
   4  -6   1   55.76    3.39
   2   4   1   58.65    2.92
   4  -6   1   60.75    2.92
   7  -3  -1    5.81    1.14
  -3  -4  -1    7.41    1.54
  -3  -4  -1    5.78    1.25
  -3  -4  -1    6.72    1.11
  -7   3   1    7.39    0.93
   3   4   1    7.01    1.08
   4  -7   1    7.22    1.50
   4  -7   1    6.50    1.00
  -7   3   1    8.32    1.29
  -4  -4  -1    6.76    1.59
   8  -4  -1    8.11    1.39
  -4  -4  -1    5.75    1.23
  -4  -4  -1    9.16    1.54
  -8   4   1    9.54    1.46
  -8   4   1    8.03    1.05
   4  -8   1    7.64    1.14
   4   4   1    9.54    1.32
   4  -8   1    7.18    1.70
  -5  -4  -1    5.75    1.33
   9  -5  -1    4.91    1.29
  -5  -4  -1    7.09    1.59
  -5  -4  -1    7.59    1.94
  -9   5   1    6.42    1.09
  -9   5   1    8.04    1.66
   5   4   1    9.44    1.44
   4  -9   1    6.05    1.85
   4  -9   1    6.42    1.24
  -5  -3  -1    2.03    1.47
  -3   8  -1    1.15    0.70
  -5  -3  -1    1.49    1.02
  -5  -3  -1    2.53    1.18
   8  -5  -1    1.07    1.02
  -8   5   1    0.70    1.12
   3  -8   1    2.48    1.44
   3  -8   1    3.43    0.91
   5   3   1    2.31    1.02
  -8   5   1    1.94    0.90
  -5  -2  -1   22.69    2.35
  -5  -2  -1   21.07    1.96
  -2   7  -1   22.60    1.62
  -5  -2  -1   18.93    1.76
   7  -5  -1   21.43    1.91
   5   2   1   20.75    1.83
   2  -7   1   26.25    1.85
   2  -7   1   19.07    2.24
   6  -5  -1   42.44    2.32
  -5  -1  -1   37.11    2.72
  -5  -1  -1   37.05    2.28
  -5  -1  -1   35.64    2.50
  -1   6  -1   37.86    2.17
   1  -6   1   40.69    2.28
   5   1   1   38.97    2.44
   1  -6   1   35.69    2.50
   1  -6   1   36.20    2.82
  -5   0  -1    4.57    0.94
  -5   0  -1    4.66    1.01
  -5   0  -1    4.61    1.25
   0   5  -1    5.36    0.87
   5  -5  -1    6.16    0.88
   5   0   1    4.64    0.84
   0  -5   1    8.94    1.26
   0  -5   1    6.56    0.93
   0  -5   1    6.01    1.38
   5   0   1    5.32    0.94
  -5   1  -1   29.41    2.03
   4  -5  -1   28.28    1.71
  -5   1  -1   27.41    1.78
   1   4  -1   27.53    1.80
   5  -1   1   29.73    1.85
  -1  -4   1   29.13    2.35
  -1  -4   1   29.09    2.03
  -1  -4   1   33.78    1.89
   3  -5  -1    7.45    1.34
   2   3  -1    7.35    1.01
  -5   2  -1    8.48    0.96
   2   3  -1    7.19    0.93
   3  -5  -1    7.61    0.78
  -5   2  -1    7.30    1.12
   2   3  -1    7.36    0.96
  -2  -3   1    5.86    1.19
  -2  -3   1    6.47    1.02
   5  -2   1    6.24    0.92
  -2  -3   1    6.24    0.82
   3   2  -1   11.26    1.15
   3   2  -1    8.53    1.05
   2  -5  -1    6.79    1.28
   2  -5  -1   11.49    1.03
   5  -3   1   10.07    1.07
  -3  -2   1   10.40    1.18
  -3  -2   1    8.18    1.33
  -3  -2   1   11.69    1.09
  -2   5   1    9.61    0.81
  -2   5   1   11.05    1.12
   4   1  -1   56.96    3.00
   1  -5  -1   58.23    3.45
   1  -5  -1   61.10    3.22
   1  -5  -1   58.72    2.80
   4   1  -1   57.73    2.99
  -4  -1   1   59.54    2.80
  -4  -1   1   54.04    2.84
  -4  -1   1   54.94    2.95
   5  -4   1   59.10    2.98
  -4  -1   1   55.23    3.26
  -1   5   1   56.43    2.67
   0  -5  -1   11.54    1.04
   0  -5  -1   11.53    1.39
   5   0  -1   10.70    1.00
   0  -5  -1   11.62    1.62
   5   0  -1    9.06    1.12
  -5   0   1   13.98    1.28
  -5   0   1   17.27    1.84
   0   5   1   13.41    1.17
   5  -5   1   14.00    1.32
  -5   0   1   13.25    1.37
  -1  -5  -1   14.78    1.60
  -1  -5  -1   16.98    1.34
   6  -1  -1   14.89    1.47
  -1  -5  -1   15.73    1.88
   6  -1  -1   13.86    1.26
   1   5   1   16.22    1.38
  -6   1   1   14.04    1.52
   5  -6   1   15.85    1.40
   5  -6   1   14.58    1.38
  -6   1   1   13.17    1.70
  -6   1   1   16.49    1.35
  -2  -5  -1   15.45    1.40
  -2  -5  -1   13.17    1.68
   7  -2  -1   12.58    1.44
  -2  -5  -1   12.54    1.90
   5  -7   1   13.16    1.31
  -7   2   1   16.43    1.66
   5  -7   1   10.74    1.78
  -7   2   1   14.67    1.33
   2   5   1   16.00    1.43
   5  -7   1   16.37    1.53
  -3  -5  -1   42.66    2.54
  -3  -5  -1   41.41    2.97
  -3  -5  -1   39.66    3.29
   8  -3  -1   41.29    2.84
  -8   3   1   39.54    2.36
   5  -8   1   43.32    2.51
   5  -8   1   42.95    2.71
   3   5   1   43.38    2.62
  -8   3   1   41.38    2.90
   5  -8   1   44.10    3.30
  -4  -5  -1   25.45    2.43
  -4  -5  -1   25.53    2.87
   9  -4  -1   28.85    2.56
   4   5   1   26.90    2.20
   5  -9   1   26.82    2.83
  -9   4   1   24.62    1.89
   5  -9   1   27.41    2.14
  -9   4   1   25.46    2.46
  -5  -5  -1    9.40    1.74
  10  -5  -1   11.22    1.82
  -5  -5  -1    9.78    2.32
   5 -10   1   11.23    2.23
 -10   5   1   11.88    1.31
   5   5   1   11.31    1.59
 -10   5   1   11.00    1.93
  11  -6  -1    4.54    1.65
  -6  -5  -1    3.92    2.10
  -6  -5  -1    7.46    1.77
   6   5   1    8.17    1.60
 -11   6   1    7.46    1.92
   5 -11   1   10.09    2.26
  -6  -4  -1    4.14    1.33
  -6  -4  -1    3.44    1.82
  -6  -4  -1    5.47    1.65
  10  -6  -1    5.15    1.49
   4 -10   1    5.51    1.91
   6   4   1    5.96    1.41
 -10   6   1    6.34    1.17
 -10   6   1    4.08    1.63
   9  -6  -1   50.19    3.28
  -6  -3  -1   51.14    3.16
  -6  -3  -1   49.57    3.85
  -3   9  -1   47.07    2.79
  -6  -3  -1   52.19    3.46
   3  -9   1   54.37    3.97
  -9   6   1   48.61    2.98
   6   3   1   52.26    3.28
  -6  -2  -1   30.02    2.95
  -2   8  -1   32.71    2.13
  -6  -2  -1   32.43    2.37
   8  -6  -1   34.97    2.47
  -6  -2  -1   32.99    2.64
   2  -8   1   27.17    2.86
   2  -8   1   36.72    2.31
   6   2   1   33.39    2.50
  -6  -1  -1   11.60    1.62
   7  -6  -1   13.16    1.45
  -1   7  -1   13.67    1.31
  -6  -1  -1   11.23    1.41
  -6  -1  -1   12.42    1.86
   1  -7   1   11.07    1.85
   1  -7   1   10.44    1.62
   1  -7   1   15.36    1.45
   6   1   1   12.89    1.50
  -6   0  -1   12.14    1.79
   6  -6  -1   12.47    1.28
  -6   0  -1   12.53    1.47
   0   6  -1   10.52    1.17
  -6   0  -1   12.26    1.33
   6   0   1    9.49    1.28
   0  -6   1   11.52    1.25
   0  -6   1    9.12    1.72
   0  -6   1    8.55    1.41
   5  -6  -1   42.70    2.35
   1   5  -1   39.64    2.38
  -6   1  -1   40.15    2.38
  -6   1  -1   44.75    2.68
  -6   1  -1   41.10    2.84
   6  -1   1   40.24    2.32
   6  -1   1   41.09    2.56
  -1  -5   1   39.29    2.65
  -1  -5   1   43.69    2.39
  -1  -5   1   41.07    2.95
   2   4  -1   39.97    2.30
   4  -6  -1   38.61    2.73
   4  -6  -1   38.09    2.18
   4  -6  -1   36.86    2.07
  -6   2  -1   38.35    2.44
  -6   2  -1   40.30    2.26
   6  -2   1   38.06    2.39
  -2  -4   1   38.36    2.48
  -2  -4   1   38.14    2.19
  -2  -4   1   38.46    2.77
  -6   3  -1   24.11    1.90
   3  -6  -1   20.59    2.03
  -6   3  -1   25.09    1.77
   3   3  -1   25.50    1.85
   3  -6  -1   22.67    1.52
  -3  -3   1   20.53    2.10
  -3  -3   1   21.34    1.85
   6  -3   1   25.67    1.87
   4   2  -1    3.03    0.85
   2  -6  -1    6.48    1.41
   2  -6  -1    5.86    0.81
   2  -6  -1    6.42    1.19
   4   2  -1    5.42    0.99
  -2   6   1    5.99    0.75
  -4  -2   1    5.24    0.99
  -4  -2   1    8.09    0.99
   6  -4   1    4.99    1.02
  -4  -2   1    5.34    1.06
  -4  -2   1    4.35    1.31
   5   1  -1   24.35    1.78
   1  -6  -1   28.18    2.48
   1  -6  -1   28.57    1.77
   1  -6  -1   29.46    2.17
   5   1  -1   30.64    2.06
  -5  -1   1   23.56    2.16
  -5  -1   1   26.57    1.73
  -5  -1   1   26.98    2.00
   6  -5   1   25.41    1.95
  -1   6   1   27.23    1.61
   6   0  -1   60.95    3.21
   0  -6  -1   63.03    3.94
   0  -6  -1   73.10    3.80
   0  -6  -1   70.90    3.30
   6   0  -1   65.12    3.54
   0   6   1   71.50    3.33
  -6   0   1   63.44    3.90
   6  -6   1   72.37    3.61
  -6   0   1   64.96    3.61
  -6   0   1   69.52    3.36
  -1  -6  -1    6.71    1.43
  -1  -6  -1    5.84    0.95
  -1  -6  -1    4.17    1.56
   7  -1  -1    7.26    1.33
   7  -1  -1    5.99    0.94
   1   6   1    7.32    1.05
  -7   1   1    6.59    1.60
  -7   1   1    7.72    1.03
   6  -7   1    6.91    1.18
  -7   1   1    8.52    1.35
   6  -7   1    7.29    1.09
  -2  -6  -1    0.16    1.39
  -2  -6  -1    0.50    1.11
  -2  -6  -1   -0.05    0.54
   8  -2  -1    0.77    1.08
   6  -8   1    1.77    0.85
   2   6   1    1.71    0.91
  -8   2   1    2.66    1.22
  -8   2   1    2.62    0.84
   6  -8   1    1.18    0.94
  -3  -6  -1   63.15    4.53
   9  -3  -1   67.90    3.90
  -3  -6  -1   62.86    3.83
  -3  -6  -1   60.21    3.95
   3   6   1   63.85    3.55
   6  -9   1   59.86    4.26
  -9   3   1   62.62    3.30
   6  -9   1   69.34    3.73
  -9   3   1   67.49    3.92
  -4  -6  -1   14.13    2.51
  10  -4  -1   14.67    2.04
  -4  -6  -1   11.31    1.96
   4   6   1   14.66    1.75
 -10   4   1   12.68    1.36
   6 -10   1   12.81    2.36
   6 -10   1   11.49    1.68
 -10   4   1   14.74    2.13
  11  -5  -1    5.63    1.68
  -5  -6  -1    0.78    1.97
  -5  -6  -1    2.35    1.53
   6 -11   1    5.52    1.47
   6 -11   1    2.88    2.06
 -11   5   1    5.99    1.91
  -6  -6  -1    9.41    2.08
  12  -6  -1    8.89    1.93
  -6  -6  -1   14.16    2.85
   6 -12   1   13.24    1.97
   6 -12   1   10.94    2.67
 -12   6   1   13.03    2.38
  -7  -6  -1    8.50    2.17
  -7  -6  -1    6.91    2.68
  13  -7  -1    9.46    2.09
   6 -13   1   12.00    2.91
 -13   7   1    8.77    2.52
   6 -13   1    9.64    1.91
  -7  -5  -1   15.62    2.34
  -7  -5  -1   16.21    3.00
  12  -7  -1   16.48    2.27
   5 -12   1   17.91    2.97
 -12   7   1   21.67    2.80
  11  -7  -1    0.48    1.39
  -7  -4  -1    1.14    1.25
  -7  -4  -1    0.13    1.74
  -7  -4  -1   -0.79    1.46
   7   4   1    2.80    1.36
 -11   7   1    2.26    1.70
   4 -11   1    0.71    1.81
  -7  -3  -1    3.15    1.50
  -7  -3  -1    5.56    1.40
  10  -7  -1    5.80    1.56
  -7  -3  -1    4.42    2.01
   7   3   1    4.17    1.38
 -10   7   1    3.40    1.21
   3 -10   1    3.99    1.86
  -7  -2  -1   30.17    3.27
  -2   9  -1   35.57    2.33
   9  -7  -1   35.00    2.70
  -7  -2  -1   31.14    2.76
  -7  -2  -1   38.36    2.72
   2  -9   1   29.13    3.19
   7   2   1   33.13    2.69
  -7  -1  -1   21.02    1.94
  -7  -1  -1   19.60    2.14
  -1   8  -1   22.02    1.82
  -7  -1  -1   23.93    2.62
   8  -7  -1   24.28    2.07
   1  -8   1   19.37    2.21
   1  -8   1   16.29    2.45
   7   1   1   24.05    2.18
   1  -8   1   23.54    1.91
   7  -7  -1   11.65    1.39
  -7   0  -1   11.54    1.90
   0   7  -1   13.84    1.39
  -7   0  -1   11.42    1.40
  -7   0  -1   10.47    1.59
   7   0   1   13.12    1.59
   0  -7   1    9.10    1.85
   0  -7   1   15.12    1.49
   0  -7   1    9.32    1.67
   1   6  -1   18.92    1.64
  -7   1  -1   14.63    2.01
  -7   1  -1   20.85    1.94
   6  -7  -1   17.70    1.58
  -7   1  -1   16.48    1.57
   7  -1   1   16.04    1.64
  -1  -6   1   17.99    1.91
  -1  -6   1   21.03    2.37
   2   5  -1   88.29    4.40
   5  -7  -1   91.14    4.30
  -7   2  -1   91.16    4.65
   5  -7  -1   93.93    4.29
  -7   2  -1   92.31    4.36
  -2  -5   1   86.23    4.83
  -2  -5   1   85.35    4.45
   7  -2   1   86.44    4.37
   4  -7  -1   51.60    2.60
  -7   3  -1   50.47    3.04
   3   4  -1   49.07    2.80
  -7   3  -1   46.76    2.73
   4  -7  -1   49.79    3.26
   7  -3   1   51.45    3.10
  -3  -4   1   57.12    3.53
  -3  -4   1   48.65    3.05
  -3  -4   1   54.71    2.90
   3  -7  -1   18.66    2.10
  -7   4  -1   14.85    1.69
   3  -7  -1   19.00    1.48
  -7   4  -1   17.46    1.58
   4   3  -1   17.20    1.60
   7  -4   1   14.16    1.49
  -4  -3   1   18.11    1.74
  -4  -3   1   15.24    1.95
   2  -7  -1  114.30    5.96
   2  -7  -1  131.30    6.38
   2  -7  -1  131.75    5.61
   5   2  -1  119.55    5.78
  -2   7   1  123.90    5.40
  -5  -2   1  127.79    6.28
  -5  -2   1  119.65    5.79
   7  -5   1  118.14    5.75
  -5  -2   1  126.66    5.60
   1  -7  -1   41.98    2.88
   1  -7  -1   41.35    2.35
   1  -7  -1   39.53    3.15
   6   1  -1   39.17    2.65
  -6  -1   1   41.47    2.41
  -6  -1   1   39.36    3.08
  -1   7   1   39.53    2.21
  -6  -1   1   38.72    2.65
   0  -7  -1   13.18    1.34
   0  -7  -1   10.46    1.90
   0  -7  -1   10.67    1.70
   7   0  -1   11.34    1.53
  -7   0   1   12.05    1.30
  -7   0   1   13.86    2.04
   0   7   1   11.32    1.22
  -7   0   1   10.19    1.51
   7  -7   1   11.41    1.43
  -1  -7  -1   16.23    2.06
   8  -1  -1   15.56    1.87
  -1  -7  -1   17.25    1.56
  -1  -7  -1   17.19    2.40
  -8   1   1   10.85    2.03
   7  -8   1   15.41    1.67
  -8   1   1   16.46    1.50
   1   7   1   16.33    1.52
   7  -8   1   11.89    1.42
  -8   1   1   16.25    1.88
  -2  -7  -1    2.49    1.71
  -2  -7  -1    3.35    1.42
   9  -2  -1    3.52    1.45
   2   7   1    4.58    1.13
   7  -9   1    5.24    1.29
  -9   2   1    3.28    1.39
  -9   2   1    2.74    0.96
  -9   2   1    2.72    1.77
  -3  -7  -1   12.01    1.98
  -3  -7  -1   13.21    2.54
  10  -3  -1   10.63    1.76
   3   7   1   15.66    2.50
 -10   3   1   10.87    1.34
 -10   3   1   10.97    2.22
   7 -10   1   13.59    1.75
 -10   3   1   11.47    1.95
  -4  -7  -1    5.16    1.58
  11  -4  -1    1.17    1.53
  -4  -7  -1   -1.24    1.79
   7 -11   1    1.19    1.34
 -11   4   1   -0.14    1.46
  -5  -7  -1    1.61    2.12
  12  -5  -1    3.87    1.76
  -5  -7  -1    4.28    1.81
   7 -12   1   -1.18    1.33
 -12   5   1    5.00    1.85
  -6  -7  -1   -0.19    2.30
  -6  -7  -1    0.83    1.67
  13  -6  -1    2.29    1.88
   7 -13   1   -0.22    2.45
   7 -13   1    0.53    1.51
 -13   6   1   -0.44    1.85
  -8  -5  -1    6.20    1.98
  13  -8  -1    7.30    2.00
  -8  -5  -1    6.31    2.61
 -13   8   1    3.22    2.19
   5 -13   1    8.77    2.63
  -8  -4  -1    9.24    2.15
  12  -8  -1    7.98    1.97
  -8  -4  -1   10.83    2.63
   4 -12   1    8.71    2.52
   8   4   1   10.05    1.95
 -12   8   1    9.68    2.25
  11  -8  -1    2.83    1.51
  -8  -3  -1    2.07    1.35
  -8  -3  -1    1.29    2.04
  -8  -3  -1    0.22    1.47
   3 -11   1    0.46    1.89
   8   3   1    0.62    1.34
 -11   8   1    1.64    1.71
  -8  -2  -1   14.92    2.23
  -8  -2  -1   13.18    2.55
  10  -8  -1   15.01    1.94
  -8  -2  -1   15.89    1.96
   2 -10   1   14.56    2.57
   8   2   1   13.75    1.95
  -8  -1  -1    5.03    1.88
   9  -8  -1    6.96    1.39
  -8  -1  -1    6.09    1.64
  -8  -1  -1    5.44    1.40
   1  -9   1    3.28    1.87
   8   1   1    6.86    1.54
   1  -9   1    4.17    1.53
   0   8  -1    6.74    1.19
  -8   0  -1    8.55    1.62
   8  -8  -1    6.29    1.29
  -8   0  -1    8.39    1.38
  -8   0  -1    5.67    1.82
   8   0   1    4.52    1.35
   0  -8   1    6.80    1.53
   0  -8   1    6.59    1.85
  -8   1  -1    5.18    1.39
   7  -8  -1    3.01    0.91
   1   7  -1    2.65    0.99
   7  -8  -1    5.38    1.15
  -8   1  -1    2.96    1.61
  -8   1  -1    5.80    1.20
   8  -1   1    4.03    1.31
  -1  -7   1    5.08    1.40
  -1  -7   1    4.54    1.10
  -1  -7   1    4.43    1.64
   2   6  -1   14.27    1.58
   6  -8  -1   14.87    1.50
  -8   2  -1   14.82    2.10
  -8   2  -1   16.41    1.56
   6  -8  -1   13.24    1.36
  -8   2  -1   16.67    1.87
   8  -2   1   14.61    1.75
  -2  -6   1   18.01    2.34
  -2  -6   1   18.54    1.73
  -2  -6   1   16.46    1.95
  -8   3  -1   17.92    1.96
  -8   3  -1   19.07    1.69
   3   5  -1   21.56    1.90
   5  -8  -1   19.45    2.30
   5  -8  -1   19.60    1.58
   5  -8  -1   18.16    1.63
  -3  -5   1   17.98    1.96
  -3  -5   1   17.56    2.33
   8  -3   1   19.67    1.92
   4   4  -1   11.77    1.45
   4  -8  -1   12.06    1.25
  -8   4  -1   11.03    1.66
   4  -8  -1   11.67    1.86
  -8   4  -1   11.90    1.42
   8  -4   1   11.56    1.62
  -4  -4   1    9.86    1.88
  -4  -4   1   11.48    1.58
   5   3  -1   10.86    1.41
   3  -8  -1   11.57    1.98
   3  -8  -1   11.29    1.23
  -8   5  -1    9.67    1.63
  -8   5  -1   10.23    1.42
  -5  -3   1   13.13    2.08
   8  -5   1   12.08    1.48
  -5  -3   1   11.70    1.64
   6   2  -1    4.60    1.25
   2  -8  -1    3.95    1.36
   2  -8  -1    5.58    1.00
   2  -8  -1    3.83    1.57
  -6  -2   1    3.26    1.02
  -6  -2   1    5.18    1.33
  -6  -2   1    4.60    1.62
  -2   8   1    6.62    0.89
   8  -6   1    2.35    1.14
   7   1  -1    3.67    1.31
   1  -8  -1    6.71    1.52
   1  -8  -1    5.96    1.84
   1  -8  -1    6.04    1.03
  -7  -1   1    3.40    1.61
  -7  -1   1    5.22    1.16
   8  -7   1    4.03    1.24
  -7  -1   1    5.08    1.33
  -1   8   1    6.01    0.94
   0  -8  -1    9.68    1.84
   0  -8  -1    8.95    2.03
   8   0  -1    9.92    1.65
   8  -8   1   12.41    1.66
  -8   0   1    9.04    1.65
  -8   0   1   10.75    1.38
  -8   0   1   11.17    2.11
   0   8   1   11.36    1.30
  -1  -8  -1    8.52    2.17
   9  -1  -1   11.02    1.82
  -1  -8  -1    9.06    1.79
  -9   1   1   11.17    1.37
   8  -9   1   12.21    1.70
  -9   1   1    7.88    1.70
  -9   1   1   11.10    2.19
  -2  -8  -1    3.71    1.59
  10  -2  -1    5.38    1.61
  -2  -8  -1    4.40    2.11
 -10   2   1    5.44    1.20
 -10   2   1    5.78    2.06
 -10   2   1    8.32    1.76
   8 -10   1    8.45    1.61
  -3  -8  -1    7.27    2.34
  -3  -8  -1    8.82    1.91
  11  -3  -1    4.30    1.66
 -11   3   1    4.57    2.14
 -11   3   1    6.53    1.81
   8 -11   1    7.22    1.65
  12  -4  -1    4.16    1.86
  -4  -8  -1    1.98    2.31
  -4  -8  -1    8.84    2.10
 -12   4   1    5.49    1.97
 -12   4   1    5.90    2.31
   8 -12   1    3.36    1.54
  13  -5  -1    3.19    1.97
  -5  -8  -1   -0.20    2.28
  -5  -8  -1    3.21    1.84
 -13   5   1    2.41    2.06
   8 -13   1    2.87    1.54
 -13   5   1    0.09    2.22
  -9  -4  -1    7.96    2.21
  13  -9  -1    1.29    1.68
  -9  -4  -1   10.14    2.92
   4 -13   1    0.88    2.19
 -13   9   1    3.10    2.19
  12  -9  -1    6.23    1.80
  -9  -3  -1    8.87    1.73
  -9  -3  -1    5.22    2.48
  -9  -3  -1    4.45    1.90
 -12   9   1    9.42    2.27
   9   3   1    8.03    1.89
   3 -12   1    7.28    2.41
  -9  -2  -1   -0.46    1.23
  11  -9  -1   -0.98    1.37
  -9  -2  -1    0.78    1.60
  -9  -2  -1    0.73    2.06
   9   2   1    0.50    1.45
   2 -11   1    0.69    1.96
  10  -9  -1    4.90    1.58
  -9  -1  -1    3.46    2.08
  -9  -1  -1    5.36    1.73
  -9  -1  -1    4.12    1.42
   9   1   1    4.83    1.51
   1 -10   1    4.44    1.79
   1 -10   1    2.43    1.97
  -9   0  -1    8.81    2.10
   9  -9  -1    7.04    1.44
  -9   0  -1    7.58    1.45
  -9   0  -1    4.05    1.62
   0  -9   1    9.13    1.94
   9   0   1    7.78    1.72
   0  -9   1    9.38    2.29
  -9   1  -1    3.79    1.80
   1   8  -1    3.21    1.12
   8  -9  -1    4.07    1.22
  -9   1  -1    4.52    1.49
  -9   1  -1    1.82    1.13
  -1  -8   1    2.99    1.82
  -1  -8   1    3.29    1.48
   9  -1   1    2.29    1.41
  -9   2  -1    7.67    1.95
   7  -9  -1    8.08    1.34
  -9   2  -1    9.19    1.71
  -9   2  -1    7.87    1.35
   2   7  -1    6.20    1.27
  -2  -7   1    6.49    1.98
   9  -2   1   10.51    1.68
  -2  -7   1    8.17    1.68
   6  -9  -1    1.38    0.98
   3   6  -1    2.69    1.12
  -9   3  -1    0.95    1.34
  -9   3  -1    4.66    1.11
   9  -3   1    2.85    1.41
  -3  -6   1    2.09    1.26
  -3  -6   1    1.99    1.64
   5  -9  -1    7.03    1.21
  -9   4  -1    7.13    1.64
   4   5  -1    3.90    1.21
  -9   4  -1    6.57    1.19
   5  -9  -1    5.96    1.16
   5  -9  -1    5.25    1.74
   9  -4   1    3.68    1.33
  -4  -5   1    7.37    1.52
  -4  -5   1    4.60    1.71
   4  -9  -1   12.03    2.14
   4  -9  -1   12.73    1.47
  -9   5  -1   13.01    1.57
  -9   5  -1   12.97    1.93
   5   4  -1   13.50    1.66
   9  -5   1   14.18    1.78
  -5  -4   1   10.39    2.03
  -5  -4   1   10.99    1.73
   6   3  -1   -0.63    1.03
  -9   6  -1   -0.32    1.11
   3  -9  -1    1.65    1.63
  -9   6  -1    0.73    1.32
  -6  -3   1    1.71    1.19
   9  -6   1    4.24    1.31
  -6  -3   1    1.24    1.58
   2  -9  -1    2.86    1.41
   2  -9  -1    3.78    1.74
   7   2  -1    2.54    1.26
  -7  -2   1    4.51    1.80
  -7  -2   1    4.67    1.43
   9  -7   1    4.06    1.37
  -7  -2   1    4.78    1.15
   1  -9  -1    4.37    1.89
   1  -9  -1    4.38    1.55
   8   1  -1    3.56    1.43
  -8  -1   1   -0.47    1.64
  -8  -1   1    5.29    1.20
   9  -8   1    3.71    1.37
  -8  -1   1    5.93    1.53
   0  -9  -1    3.34    1.57
   0  -9  -1    5.16    1.97
   9   0  -1    5.53    1.50
  -9   0   1    4.46    1.54
  -9   0   1    4.78    1.25
   9  -9   1    4.27    1.46
  -9   0   1    3.53    1.83
  10  -1  -1    4.50    1.62
  -1  -9  -1    1.30    1.81
  -1  -9  -1   -1.11    1.46
 -10   1   1    0.32    1.48
 -10   1   1    3.49    1.14
   9 -10   1   -0.43    1.28
 -10   1   1    1.92    1.84
  11  -2  -1    3.58    1.57
  -2  -9  -1    2.17    2.09
  -2  -9  -1    1.19    1.66
 -11   2   1    0.55    1.98
   9 -11   1   -0.06    1.39
 -11   2   1    2.90    1.66
  12  -3  -1   15.13    2.40
  -3  -9  -1   14.55    2.44
  -3  -9  -1   15.63    3.13
 -12   3   1   10.44    2.29
   9 -12   1   13.71    2.03
 -12   3   1   12.62    2.78
  -4  -9  -1    1.40    1.80
  -4  -9  -1   11.14    2.95
  13  -4  -1    6.02    2.05
 -13   4   1    9.47    2.33
   9 -13   1    5.47    1.75
 -13   4   1    6.03    2.56
 -10  -2  -1   16.15    2.13
 -10  -2  -1   16.08    2.97
  12 -10  -1   15.45    2.27
 -10  -2  -1   20.59    2.82
  10   2   1   16.09    2.41
   2 -12   1   11.03    2.89
 -10  -1  -1    3.92    1.52
  11 -10  -1    1.32    1.50
 -10  -1  -1    5.83    1.91
 -10  -1  -1    4.81    2.41
   1 -11   1    3.71    2.27
  10   1   1    0.93    1.57
  10 -10  -1   -0.14    1.33
 -10   0  -1   -0.23    1.24
 -10   0  -1    0.46    1.59
 -10   0  -1    2.87    2.04
   0 -10   1    0.08    1.91
  10   0   1   -1.03    1.41
   0 -10   1    1.34    1.58
 -10   1  -1    3.45    2.08
   9 -10  -1    7.29    1.54
 -10   1  -1    6.30    1.46
 -10   1  -1    6.00    1.81
  -1  -9   1    8.27    1.91
  10  -1   1    9.63    1.96
  -1  -9   1    6.30    2.14
 -10   2  -1   21.13    2.05
 -10   2  -1   19.76    2.38
 -10   2  -1   18.43    2.77
   8 -10  -1   22.11    2.12
  -2  -8   1   26.26    2.68
  10  -2   1   22.94    2.44
  -2  -8   1   17.64    2.83
 -10   3  -1   20.92    2.43
 -10   3  -1   19.02    2.67
 -10   3  -1   21.74    1.98
   3   7  -1   23.56    2.18
   7 -10  -1   22.16    2.01
  -3  -7   1   21.39    2.49
  10  -3   1   22.52    2.41
  -3  -7   1   22.43    2.96
   6 -10  -1    1.87    1.13
   6 -10  -1    4.68    1.92
 -10   4  -1    2.69    1.13
 -10   4  -1    5.84    1.67
   4   6  -1    3.92    1.27
  -4  -6   1    1.85    1.80
  10  -4   1    5.80    1.58
  -4  -6   1    2.48    1.47
   5 -10  -1   22.86    2.92
 -10   5  -1   28.83    2.28
   5   5  -1   29.77    2.54
 -10   5  -1   28.84    2.77
   5 -10  -1   27.84    2.33
  -5  -5   1   25.28    3.01
  -5  -5   1   24.22    2.45
  10  -5   1   21.87    2.25
 -10   6  -1   25.21    2.20
   4 -10  -1   23.77    2.84
 -10   6  -1   22.46    2.54
   6   4  -1   22.33    2.25
  10  -6   1   20.95    2.25
  -6  -4   1   19.23    2.29
  -6  -4   1   22.68    2.86
   3 -10  -1   14.43    2.52
 -10   7  -1   13.78    2.15
 -10   7  -1   12.32    1.81
   7   3  -1   14.11    1.89
  -7  -3   1   10.99    1.88
  -7  -3   1   12.10    2.39
  10  -7   1   11.32    1.85
   2 -10  -1    7.64    2.21
   8   2  -1    8.47    1.69
  10  -8   1   13.30    1.94
  -8  -2   1   10.26    1.52
  -8  -2   1    7.46    2.16
  -8  -2   1    9.94    1.88
   1 -10  -1   35.10    3.43
   1 -10  -1   40.33    4.03
   9   1  -1   46.04    3.40
  -9  -1   1   40.47    3.42
  10  -9   1   42.61    3.38
  -9  -1   1   39.78    3.95
  -9  -1   1   43.35    2.85
  10   0  -1   29.48    2.83
   0 -10  -1   26.64    3.00
   0 -10  -1   32.72    3.71
  10 -10   1   31.68    2.81
 -10   0   1   31.96    3.11
 -10   0   1   29.89    2.45
 -10   0   1   24.10    3.40
  -1 -10  -1    3.82    2.26
  11  -1  -1    4.35    1.78
  -1 -10  -1    4.48    1.86
 -11   1   1    3.23    2.20
  10 -11   1    7.09    1.80
 -11   1   1    1.32    1.69
  -2 -10  -1    4.72    2.62
  12  -2  -1    8.24    2.08
  -2 -10  -1    7.04    2.10
  10 -12   1    8.09    1.86
 -12   2   1   10.28    2.30
 -12   2   1    7.84    2.64
 -11  -1  -1   16.66    2.71
  12 -11  -1   14.17    2.24
 -11  -1  -1   16.98    3.35
  11   1   1   15.97    2.42
   1 -12   1   15.35    3.16
 -11   0  -1    4.93    2.00
  11 -11  -1    4.14    1.67
 -11   0  -1    1.80    2.33
  11   0   1    2.36    1.76
   0 -11   1    5.00    1.95
   0 -11   1    5.22    2.45
 -11   1  -1    9.37    2.15
 -11   1  -1   12.67    2.54
  10 -11  -1    7.96    1.76
  -1 -10   1    9.97    2.74
  -1 -10   1    5.28    1.96
  11  -1   1   10.95    2.06
 -11   2  -1   15.49    2.82
   9 -11  -1   15.62    2.04
 -11   2  -1   17.88    2.45
  -2  -9   1   19.93    2.56
  11  -2   1   14.84    2.17
  -2  -9   1   17.18    3.00
 -11   3  -1    9.85    2.49
 -11   3  -1    9.10    2.03
 -11   3  -1   12.92    1.83
   8 -11  -1   14.09    1.76
  -3  -8   1    9.32    1.98
  11  -3   1   16.10    2.24
  -3  -8   1   13.42    2.73
 -11   4  -1    5.18    1.30
 -11   4  -1    4.82    1.77
   7 -11  -1    3.47    1.33
  -4  -7   1    5.79    2.23
  -4  -7   1    0.84    1.52
  11  -4   1    5.87    1.71
   6 -11  -1    7.95    2.20
   5   6  -1    9.04    1.68
 -11   5  -1   10.24    2.09
   6 -11  -1    6.98    1.45
 -11   5  -1    4.88    1.35
  -5  -6   1    6.74    1.76
  -5  -6   1    2.37    1.98
  11  -5   1    5.97    1.66
   5 -11  -1    4.85    2.04
 -11   6  -1    4.37    1.86
   6   5  -1    3.39    1.38
 -11   6  -1    3.88    1.24
  -6  -5   1    2.66    1.91
  11  -6   1    1.01    1.46
  -6  -5   1    2.60    1.52
 -11   7  -1   10.21    1.63
 -11   7  -1   13.38    2.19
   4 -11  -1    9.95    2.43
   7   4  -1    9.18    1.79
  11  -7   1    9.13    1.86
  -7  -4   1    9.86    1.95
  -7  -4   1    9.56    2.40
 -11   8  -1   -1.06    1.55
 -11   8  -1    2.65    1.47
   8   3  -1    4.52    1.58
   3 -11  -1    0.91    2.01
  -8  -3   1    2.95    2.08
  -8  -3   1    2.19    1.58
  11  -8   1    1.72    1.52
   2 -11  -1    5.54    2.32
   9   2  -1    5.65    1.65
  11  -9   1    3.75    1.65
  -9  -2   1    6.29    2.46
  -9  -2   1    4.15    1.75
   1 -11  -1    6.72    2.45
   1 -11  -1    9.72    2.18
  10   1  -1    7.08    1.87
 -10  -1   1    5.23    1.88
  11 -10   1   12.05    2.00
 -10  -1   1    9.04    2.67
   0 -11  -1    2.65    1.96
  11   0  -1    2.36    1.77
   0 -11  -1    0.68    2.14
  11 -11   1    4.05    1.76
 -11   0   1    3.46    1.87
 -11   0   1    5.36    2.41
  -1 -11  -1    1.38    2.37
  12  -1  -1   -0.39    1.61
  -1 -11  -1    4.91    2.02
 -12   1   1   -0.80    2.15
 -12   1   1   -1.30    1.70
  11 -12   1   -2.68    1.48
 -12   1  -1   -1.19    1.79
 -12   1  -1    1.56    2.34
  11 -12  -1   -1.29    1.50
  12  -1   1    1.32    1.67
  -1 -11   1   -2.29    2.20
  -1 -11   1    2.39    2.00
 -12   2  -1    8.23    2.31
 -12   2  -1    7.33    2.61
  10 -12  -1   14.08    1.98
  -2 -10   1    7.89    2.61
  -2 -10   1    8.45    2.23
  12  -2   1    9.23    2.06
 -12   3  -1    1.94    1.83
 -12   3  -1    1.57    2.14
   9 -12  -1    2.80    1.48
  -3  -9   1    4.95    2.52
  -3  -9   1    6.34    1.98
  12  -3   1    3.31    1.84
   8 -12  -1    4.91    1.49
 -12   4  -1    5.91    2.06
 -12   4  -1    4.41    2.25
  -4  -8   1    2.69    1.78
  -4  -8   1    8.96    2.60
  12  -4   1    3.94    1.84
   7 -12  -1    2.30    1.30
 -12   5  -1    1.67    1.77
  -5  -7   1    4.07    1.81
  -5  -7   1    0.58    2.29
  12  -5   1    3.20    1.69
 -12   6  -1    2.95    1.99
   6 -12  -1    1.68    1.27
   6 -12  -1    2.20    2.15
  12  -6   1    1.65    1.65
  -6  -6   1    5.20    1.78
  -6  -6   1    1.51    2.11
 -12   7  -1    5.27    2.00
   7   5  -1    4.13    1.54
   5 -12  -1    3.02    2.12
  -7  -5   1    2.82    1.63
  -7  -5   1    3.83    2.26
  12  -7   1    1.80    1.63
   8   4  -1    5.85    1.75
   4 -12  -1    6.55    2.37
 -12   8  -1    6.28    2.23
  -8  -4   1    7.07    1.92
  12  -8   1    6.17    1.90
  -8  -4   1    8.33    2.59
 -12   9  -1    3.90    2.16
   3 -12  -1    6.39    2.42
   9   3  -1    6.01    1.80
  -9  -3   1    2.23    2.32
  12  -9   1    1.98    1.70
  -9  -3   1    2.47    1.70
   2 -12  -1    2.14    2.28
  10   2  -1    2.16    1.66
  12 -10   1    1.46    1.71
 -10  -2   1    2.48    2.32
 -10  -2   1    2.87    1.88
  11   1  -1    4.16    1.90
   1 -12  -1    2.40    2.43
 -11  -1   1    0.45    2.36
 -11  -1   1    2.84    1.91
  12 -11   1    0.73    1.69
 -13   4  -1   -2.15    2.10
   9 -13  -1   -2.29    1.29
 -13   4  -1    1.27    1.92
  -4  -9   1    1.02    1.81
  -4  -9   1    1.13    2.27
  13  -4   1   -1.32    1.80
 -13   5  -1    4.65    2.53
   8 -13  -1    1.60    1.40
 -13   5  -1    4.45    2.22
  -5  -8   1    6.84    2.15
  13  -5   1    4.26    1.89
  -5  -8   1    4.38    2.60
 -13   6  -1    0.66    2.00
   7 -13  -1    5.62    1.47
  -6  -7   1    4.68    2.58
  13  -6   1    1.24    1.83
  -6  -7   1    4.44    1.93
 -13   7  -1   -2.04    2.00
   6 -13  -1    1.39    1.32
   6 -13  -1    1.62    2.25
  -7  -6   1    4.09    2.47
  -7  -6   1    1.88    1.78
  13  -7   1    2.89    1.85
 -13   8  -1    3.37    2.20
   5 -13  -1    9.52    2.71
  -8  -5   1    9.95    2.22
  13  -8   1    5.30    1.95
  -8  -5   1    7.87    2.73
   4 -13  -1    3.85    2.54
 -13   9  -1    7.20    2.46
  -9  -4   1    8.06    2.20
  13  -9   1    8.36    2.16
  -9  -4   1    7.45    2.68
   0   0  -2    0.05    0.15
   0   0  -2   -0.18    0.21
   0   0   2   -0.14    0.12
   0   0   2   -0.02    0.12
   0   1  -2  188.79    7.35
   1  -1  -2  177.09    7.27
  -1   0  -2  155.74    7.32
  -1   0  -2  175.04    7.36
   1  -1  -2  201.08    7.28
   0   1  -2  178.57    7.39
  -1   0  -2  177.33    7.41
   0   1  -2  183.97    7.42
  -1   0  -2  176.15    7.37
   0  -1   2  174.78    7.42
   1   0   2  173.14    7.41
   0  -1   2  184.61    7.45
  -1   1   2  193.88    7.32
   1   0   2  170.30    7.43
   1   0   2  182.46    7.40
   0  -1   2  186.81    7.38
  -1   1   2  175.59    7.30
   0  -1  -2   13.56    0.91
   1   0  -2   13.82    0.74
  -1   1  -2   13.76    0.88
  -1   1  -2   14.64    0.90
   1   0  -2   13.84    0.87
   0  -1  -2   15.14    0.70
   0  -1  -2   13.90    0.91
   0  -1  -2   13.78    0.97
   0   1   2   12.47    0.90
   1  -1   2   14.00    0.89
   0   1   2   13.57    0.65
   0   1   2   13.30    0.86
   0   1   2   14.92    0.89
   1  -1   2   14.04    0.86
  -1   0   2   13.51    0.72
  -1  -1  -2  760.51   29.75
  -1   2  -2  749.62   29.81
  -1  -1  -2  708.20   29.75
  -1   2  -2  754.95   29.74
  -1  -1  -2  719.66   29.65
   2  -1  -2  723.94   29.68
  -1  -1  -2  730.49   29.79
   1  -2   2  725.30   29.37
   1   1   2  723.87   29.28
   1   1   2  739.58   29.37
   1   1   2  664.59   29.38
   1   1   2  721.71   29.38
   1  -2   2  777.90   29.47
  -2   1   2  730.47   29.31
  -2  -1  -2   71.91    3.41
  -1   3  -2   77.73    3.53
  -2  -1  -2   73.86    3.34
  -2  -1  -2   70.08    3.23
  -1   3  -2   70.73    3.29
  -1   3  -2   72.97    3.36
   3  -2  -2   73.73    3.24
  -2  -1  -2   69.70    3.45
   2   1   2   75.28    3.48
   2   1   2   72.87    3.28
   1  -3   2   76.51    3.37
   1  -3   2   78.22    3.62
  -3   2   2   70.99    3.24
   2   1   2   68.41    3.34
  -2   0  -2   20.40    1.29
   0   2  -2   21.68    1.33
  -2   0  -2   21.07    1.39
  -2   0  -2   21.01    1.43
   0   2  -2   23.11    1.51
  -2   0  -2   23.25    1.40
   2  -2  -2   22.26    1.15
   0   2  -2   21.82    1.34
   0  -2   2   22.85    1.45
   2   0   2   23.21    1.37
  -2   2   2   23.84    1.17
   0  -2   2   23.21    1.61
   0  -2   2   25.03    1.44
   2   0   2   22.28    1.46
  -2   2   2   23.41    1.18
   1   1  -2   70.25    2.99
  -2   1  -2   71.33    3.06
  -2   1  -2   65.64    3.06
   1   1  -2   69.66    3.04
   1   1  -2   70.16    3.16
   1  -2  -2   62.63    3.05
   1  -2  -2   65.71    3.13
   1  -2  -2   68.17    2.97
  -1   2   2   66.90    2.93
  -1  -1   2   71.64    3.16
  -1  -1   2   68.45    2.96
  -1  -1   2   68.90    3.01
  -1   2   2   63.11    3.00
   2  -1   2   68.48    3.05
  -1   2   2   62.52    3.07
   2   0  -2  187.74    7.66
   0  -2  -2  191.66    7.82
   2   0  -2  190.09    7.81
   0  -2  -2  183.67    7.95
   0  -2  -2  177.75    7.64
  -2   2  -2  194.83    7.88
   2   0  -2  195.12    7.76
   0  -2  -2  182.56    7.87
   0   2   2  192.04    7.85
  -2   0   2  199.04    8.01
   2  -2   2  194.25    7.87
   2  -2   2  191.44    7.91
   0   2   2  189.60    7.91
   0   2   2  176.99    7.68
   0   2   2  176.73    7.95
  -2   0   2  188.82    7.79
  -2   0   2  193.34    7.85
  -1  -2  -2   43.93    1.98
   3  -1  -2   42.86    2.14
  -1  -2  -2   42.15    2.29
  -2   3  -2   42.33    2.28
  -1  -2  -2   41.71    2.35
  -2   3  -2   42.75    2.11
   3  -1  -2   39.65    1.86
  -1  -2  -2   44.39    2.24
   1   2   2   42.00    1.98
  -3   1   2   43.84    2.10
   2  -3   2   45.85    2.15
  -3   1   2   41.12    1.82
   2  -3   2   47.01    2.36
   1   2   2   43.20    2.30
   1   2   2   34.69    2.04
  -2   4  -2   52.88    2.53
  -2  -2  -2   55.17    2.70
   4  -2  -2   50.50    2.53
  -2  -2  -2   47.57    2.41
  -2  -2  -2   47.24    2.81
  -2  -2  -2   51.52    2.62
  -4   2   2   53.58    2.56
  -4   2   2   52.24    2.37
   2   2   2   54.52    2.90
   2   2   2   54.31    2.58
   2  -4   2   54.17    2.65
   2  -4   2   56.63    3.00
   5  -3  -2   12.37    1.19
  -2   5  -2   11.84    1.10
  -3  -2  -2   10.85    1.22
  -3  -2  -2   11.67    1.06
  -3  -2  -2   10.29    1.26
  -3  -2  -2   12.22    1.47
   2  -5   2   11.40    1.47
   3   2   2    9.72    1.04
   3   2   2   11.40    1.39
   2  -5   2   10.73    1.10
   3   2   2    8.76    1.07
  -3  -1  -2    9.29    1.01
  -3  -1  -2    8.39    1.07
  -3  -1  -2    7.28    0.80
   4  -3  -2    7.51    0.81
  -1   4  -2    8.89    0.92
  -3  -1  -2    6.90    1.15
   1  -4   2    8.19    1.23
   3   1   2    8.09    0.89
   1  -4   2    9.49    1.12
   3   1   2    7.39    1.05
   1  -4   2    8.97    0.95
  -4   3   2    8.34    0.82
  -3   0  -2   57.82    2.83
  -3   0  -2   59.82    2.99
  -3   0  -2   60.42    2.93
   0   3  -2   59.46    2.86
   3  -3  -2   60.81    2.75
   0   3  -2   67.13    3.16
   0   3  -2   62.28    2.94
  -3   0  -2   57.34    3.01
  -3   3   2   61.10    3.10
   0  -3   2   65.05    2.97
   3   0   2   63.60    2.96
  -3   3   2   60.51    2.78
   0  -3   2   65.18    3.28
   0  -3   2   62.45    3.04
   3   0   2   57.33    2.91
  -3   1  -2   17.57    1.39
   1   2  -2   19.93    1.35
   2  -3  -2   17.69    1.02
  -3   1  -2   21.32    1.32
   1   2  -2   19.22    1.33
   1   2  -2   19.48    1.51
  -3   1  -2   17.77    1.40
   2  -3  -2   18.35    1.55
  -1  -2   2   20.66    1.37
  -1  -2   2   19.65    1.62
   3  -1   2   21.36    1.42
  -1  -2   2   19.51    1.39
  -2   3   2   19.82    1.22
  -2   3   2   21.41    1.54
  -2   3   2   20.59    1.44
   1  -3  -2    7.73    1.06
   2   1  -2    9.23    0.74
   1  -3  -2    6.73    0.63
  -3   2  -2    9.75    0.89
   1  -3  -2    8.79    1.01
   2   1  -2    8.18    0.83
   2   1  -2    8.93    1.07
   2   1  -2    6.56    0.74
  -1   3   2    7.97    1.00
  -2  -1   2    8.69    0.83
  -1   3   2    7.52    0.93
   3  -2   2    7.43    0.85
  -1   3   2    5.88    0.72
  -2  -1   2    7.89    0.74
  -2  -1   2    7.54    1.05
   3   0  -2    5.44    0.57
   0  -3  -2    3.74    0.84
   0  -3  -2    5.50    1.04
   0  -3  -2    3.45    0.50
   3   0  -2    5.43    0.72
   0  -3  -2    4.68    0.76
  -3   3  -2    4.64    0.82
   3   0  -2    5.13    0.78
   3  -3   2    4.37    0.79
   0   3   2    4.05    0.91
  -3   0   2    3.67    0.66
   0   3   2    3.90    0.78
   0   3   2    3.73    0.51
   0   3   2    3.53    0.67
  -3   0   2    2.87    0.93
  -3   0   2    3.03    0.57
  -3   0   2    3.97    0.51
  -1  -3  -2   81.15    3.59
  -1  -3  -2   76.64    3.82
  -1  -3  -2   73.56    3.64
  -1  -3  -2   75.77    3.36
   4  -1  -2   72.05    3.27
   1   3   2   78.95    3.87
  -4   1   2   81.30    3.60
   1   3   2   76.27    3.42
   3  -4   2   77.06    3.57
   3  -4   2   78.43    3.80
  -4   1   2   71.56    3.28
  -2  -3  -2   21.18    1.98
   5  -2  -2   22.20    1.67
  -2  -3  -2   25.20    1.84
  -2  -3  -2   24.01    1.48
  -2  -3  -2   24.34    1.69
   3  -5   2   22.74    1.97
  -5   2   2   23.09    1.73
   2   3   2   24.33    1.52
   2   3   2   21.85    1.88
  -5   2   2   23.26    1.30
   3  -5   2   22.15    1.60
  -3   6  -2    7.38    0.91
   6  -3  -2    5.95    1.02
  -3  -3  -2    5.48    1.29
  -3  -3  -2    5.23    1.02
  -3  -3  -2    5.71    0.82
  -3  -3  -2    5.53    1.08
  -6   3   2    6.49    0.73
   3  -6   2    8.69    1.03
   3  -6   2    6.26    1.36
  -6   3   2    6.47    1.10
   3   3   2    5.68    0.92
  -4  -3  -2   12.67    1.28
  -3   7  -2   14.29    1.30
  -4  -3  -2   11.16    1.43
  -4  -3  -2   11.56    1.54
   7  -4  -2   15.09    1.52
  -4  -3  -2   12.10    1.87
   3  -7   2   11.90    1.30
   4   3   2   12.78    1.32
   3  -7   2   12.15    1.76
  -7   4   2   12.05    1.50
  -7   4   2   11.85    1.07
  -4  -2  -2   17.64    1.91
  -2   6  -2   17.14    1.45
  -4  -2  -2   17.21    1.67
  -4  -2  -2   18.16    1.61
   6  -4  -2   19.22    1.64
   2  -6   2   17.06    1.95
   2  -6   2   21.99    1.64
   4   2   2   19.89    1.66
  -4  -1  -2   27.98    2.20
   5  -4  -2   29.46    1.86
  -1   5  -2   32.07    1.88
  -4  -1  -2   30.60    2.05
  -4  -1  -2   29.75    1.93
   4   1   2   28.74    1.94
   1  -5   2   32.43    2.18
   1  -5   2   32.47    2.43
   4   1   2   31.46    2.00
   1  -5   2   33.80    2.02
  -4   0  -2   20.69    1.73
   0   4  -2   23.33    1.56
   0   4  -2   22.01    1.86
  -4   0  -2   24.20    1.66
  -4   0  -2   24.32    1.89
   0   4  -2   21.96    1.67
   4  -4  -2   22.68    1.46
   0  -4   2   23.84    1.60
   0  -4   2   23.39    1.70
  -4   4   2   15.43    1.54
   4   0   2   21.77    1.60
   4   0   2   24.44    1.66
   0  -4   2   27.51    2.10
  -4   4   2   22.48    1.39
   1   3  -2    4.66    0.77
  -4   1  -2    4.70    0.85
   3  -4  -2    4.71    0.63
   1   3  -2    4.42    0.81
   3  -4  -2    4.68    1.00
  -4   1  -2    4.72    0.92
  -3   4   2    7.19    1.00
   4  -1   2    3.56    0.75
  -3   4   2    5.13    0.98
  -1  -3   2    6.49    0.97
  -1  -3   2    7.08    0.88
  -1  -3   2    3.58    0.96
   4  -1   2    5.57    0.82
  -4   2  -2   43.65    2.36
   2   2  -2   41.49    2.14
   2  -4  -2   42.03    1.98
   2   2  -2   45.48    2.26
   2   2  -2   38.15    2.22
  -4   2  -2   44.34    2.33
   2  -4  -2   46.88    2.58
  -2   4   2   36.05    2.41
  -2   4   2   43.52    2.16
   4  -2   2   44.33    2.34
  -2  -2   2   44.95    2.23
  -2  -2   2   44.61    2.58
  -2  -2   2   44.89    2.31
  -2   4   2   39.44    2.32
   3   1  -2    8.87    0.98
   1  -4  -2    8.31    1.26
   1  -4  -2    6.96    0.66
   3   1  -2    8.56    0.80
   3   1  -2    8.33    0.89
   1  -4  -2    8.67    1.13
  -3  -1   2    8.62    0.96
   4  -3   2    8.35    0.99
  -3  -1   2   10.85    0.88
  -3  -1   2    9.22    1.27
  -3  -1   2    8.92    0.96
  -1   4   2   10.19    0.98
  -1   4   2    8.56    1.13
  -1   4   2    7.37    0.71
  -1   4   2   10.67    1.15
   0  -4  -2   27.06    1.90
  -4   4  -2   25.92    1.83
   4   0  -2   27.39    1.77
   0  -4  -2   31.63    2.23
   0  -4  -2   26.49    1.73
   4   0  -2   25.26    1.51
   0  -4  -2   27.62    1.51
   0   4   2   24.26    1.69
  -4   0   2   26.56    1.59
  -4   0   2   24.82    1.40
   0   4   2   23.47    1.38
   0   4   2   21.65    1.88
   4  -4   2   28.16    1.76
  -4   0   2   26.38    2.08
  -4   0   2   26.22    1.71
   0   4   2   25.54    1.65
  -1  -4  -2  136.19    5.99
   5  -1  -2  130.32    5.71
   5  -1  -2  126.57    5.78
   5  -1  -2  123.34    5.48
  -1  -4  -2  136.00    5.59
  -1  -4  -2  130.22    5.77
  -1  -4  -2  120.05    6.10
   4  -5   2  131.61    6.15
  -5   1   2  136.44    5.88
   1   4   2  128.64    5.69
   4  -5   2  134.42    5.83
  -5   1   2  126.89    5.56
   4  -5   2  133.68    5.90
   6  -2  -2   40.00    2.37
  -2  -4  -2   36.33    2.30
  -2  -4  -2   39.73    2.77
  -2  -4  -2   39.24    2.12
  -2  -4  -2   35.21    2.41
   4  -6   2   43.49    2.24
  -6   2   2   36.10    1.90
  -6   2   2   36.37    2.33
   4  -6   2   33.12    2.46
   2   4   2   38.78    2.13
  -3  -4  -2   38.60    2.62
   7  -3  -2   43.11    2.54
  -3  -4  -2   37.99    2.92
  -3  -4  -2   38.39    2.23
  -3  -4  -2   36.92    2.51
   4  -7   2   37.20    2.26
   4  -7   2   39.23    2.87
  -7   3   2   36.42    2.00
   3   4   2   37.89    2.31
  -7   3   2   38.73    2.50
  -4  -4  -2    1.08    1.10
  -4  -4  -2    1.30    1.28
   8  -4  -2    0.21    0.97
  -4  -4  -2   -0.48    1.00
  -4  -4  -2    0.48    0.71
  -8   4   2    1.60    0.68
   4   4   2    1.31    0.91
   4  -8   2    1.83    1.37
  -8   4   2    0.96    1.05
   4  -8   2    1.32    0.78
  -5  -4  -2   28.63    3.02
  -5  -4  -2   37.05    2.89
  -5  -4  -2   28.87    2.53
   9  -5  -2   32.73    2.64
  -9   5   2   28.48    1.94
   4  -9   2   30.08    2.99
  -9   5   2   33.41    2.77
   4  -9   2   32.79    2.54
   5   4   2   29.05    2.42
  -5  -3  -2    1.79    1.09
  -5  -3  -2    1.47    1.16
  -5  -3  -2    1.33    1.44
   8  -5  -2    2.10    1.01
  -3   8  -2    1.96    0.81
   3  -8   2    1.72    1.36
  -8   5   2    1.33    0.79
   5   3   2    0.82    0.98
   3  -8   2    2.45    0.88
  -5  -2  -2   54.57    3.36
  -2   7  -2   59.51    3.04
  -5  -2  -2   56.74    3.19
   7  -5  -2   60.82    3.20
  -5  -2  -2   55.45    3.67
   2  -7   2   61.32    3.17
   2  -7   2   54.78    3.58
   5   2   2   56.16    3.19
  -5  -1  -2   70.72    3.69
  -5  -1  -2   75.94    4.02
  -5  -1  -2   65.18    3.48
   6  -5  -2   68.49    3.44
  -1   6  -2   68.30    3.43
   1  -6   2   67.85    3.40
   1  -6   2   71.24    3.99
   5   1   2   62.52    3.47
   1  -6   2   68.48    3.68
   5  -5  -2   13.02    1.20
  -5   0  -2   13.70    1.44
  -5   0  -2   15.29    1.34
   0   5  -2   14.15    1.26
  -5   0  -2   14.41    1.66
   0  -5   2   14.26    1.81
   0  -5   2   15.27    1.56
   0  -5   2   16.31    1.39
   5   0   2   14.77    1.34
   5   0   2   17.09    1.48
  -5   1  -2   11.67    1.38
   1   4  -2   13.91    1.28
  -5   1  -2   14.72    1.51
  -5   1  -2   13.17    1.26
   4  -5  -2   12.47    1.17
  -1  -4   2   11.52    1.58
  -1  -4   2   13.48    1.38
  -1  -4   2   15.50    1.31
   5  -1   2   12.62    1.24
   2   3  -2   24.84    1.70
   3  -5  -2   23.93    1.48
  -5   2  -2   26.28    1.82
   2   3  -2   25.49    1.75
   3  -5  -2   27.11    1.46
  -5   2  -2   27.41    1.88
   3  -5  -2   22.95    1.91
   2   3  -2   25.66    1.66
  -2  -3   2   27.31    1.72
  -2  -3   2   26.82    1.84
   5  -2   2   25.90    1.85
  -3   5   2   25.82    1.64
  -2  -3   2   26.52    2.14
   2  -5  -2   40.81    2.67
   3   2  -2   42.73    2.30
   3   2  -2   39.55    2.24
   2  -5  -2   37.50    2.45
   2  -5  -2   40.92    2.02
  -3  -2   2   38.20    2.23
  -3  -2   2   40.01    2.67
  -2   5   2   35.35    2.14
   5  -3   2   39.45    2.29
   1  -5  -2   67.03    3.65
   4   1  -2   62.42    3.12
   4   1  -2   59.52    3.16
   4   1  -2   61.40    2.98
   1  -5  -2   66.46    2.93
   1  -5  -2   60.88    3.37
  -4  -1   2   68.81    3.16
   5  -4   2   67.45    3.42
  -4  -1   2   67.47    3.35
  -4  -1   2   67.35    3.33
  -4  -1   2   71.37    3.74
  -1   5   2   64.79    3.02
   5   0  -2   21.56    1.75
   0  -5  -2   23.45    1.44
   5   0  -2   18.96    1.38
   0  -5  -2   22.37    1.87
   0  -5  -2   24.71    2.20
  -5   0   2   22.19    1.76
  -5   0   2   19.01    1.94
   5  -5   2   26.36    1.83
   0   5   2   22.11    1.41
  -5   0   2   23.41    1.45
   6  -1  -2    3.08    0.91
  -1  -5  -2    2.42    0.66
   6  -1  -2    2.19    0.62
  -1  -5  -2    3.61    1.07
  -1  -5  -2    1.72    1.22
  -6   1   2    3.35    0.66
   5  -6   2    1.53    0.84
  -6   1   2    2.08    0.89
   5  -6   2    1.95    0.74
   1   5   2    1.73    0.68
  -6   1   2    2.82    1.16
  -2  -5  -2   91.70    4.15
  -2  -5  -2   87.61    4.55
  -2  -5  -2   86.48    4.85
  -2  -5  -2   82.90    4.29
  -7   2   2   87.08    3.94
  -7   2   2   87.42    4.38
   5  -7   2   87.54    4.35
   5  -7   2   87.00    4.22
   2   5   2   90.38    4.17
   5  -7   2   83.54    4.74
  -3  -5  -2   19.08    2.06
  -3  -5  -2   17.25    1.81
  -3  -5  -2   19.06    2.34
   8  -3  -2   20.47    1.96
  -8   3   2   19.38    1.39
   3   5   2   15.87    1.56
  -8   3   2   16.06    1.87
   5  -8   2   17.94    1.62
   5  -8   2   18.08    1.76
   5  -8   2   16.35    2.21
   9  -4  -2   10.93    1.57
  -4  -5  -2   11.70    2.13
  -4  -5  -2   11.00    1.73
  -4  -5  -2   11.02    1.59
  -9   4   2   12.14    1.81
   5  -9   2   14.35    2.22
   4   5   2   15.45    1.60
  -9   4   2   11.63    1.19
  -5  -5  -2   30.10    2.87
  -5  -5  -2   33.97    2.65
  -5  -5  -2   35.30    3.55
  10  -5  -2   34.79    2.92
   5   5   2   33.99    2.62
 -10   5   2   29.87    2.07
   5 -10   2   34.03    3.38
 -10   5   2   39.81    3.19
  11  -6  -2   13.66    2.14
  -6  -5  -2   15.97    2.27
  -6  -5  -2   20.00    2.99
 -11   6   2   14.74    2.23
   6   5   2   14.91    1.90
   5 -11   2   14.93    2.65
  -6  -4  -2   26.86    3.07
  -6  -4  -2   26.47    2.75
  -6  -4  -2   20.24    2.23
  10  -6  -2   27.47    2.51
 -10   6   2   22.94    2.46
 -10   6   2   21.78    1.78
   4 -10   2   21.17    2.82
   6   4   2   23.87    2.20
  -6  -3  -2    4.19    1.79
   9  -6  -2    1.93    1.18
  -3   9  -2    1.04    0.83
  -6  -3  -2    0.87    1.14
  -6  -3  -2    2.38    1.35
   3  -9   2   -0.33    1.45
   6   3   2    1.65    1.12
  -9   6   2    1.04    0.89
   8  -6  -2   18.12    1.78
  -6  -2  -2   17.44    2.34
  -6  -2  -2   14.49    1.86
  -6  -2  -2   16.49    1.78
  -2   8  -2   18.75    1.64
   2  -8   2   17.93    1.72
   6   2   2   16.49    1.73
   2  -8   2   13.83    2.20
  -6  -1  -2   34.30    2.90
  -1   7  -2   38.18    2.31
   7  -6  -2   36.20    2.38
  -6  -1  -2   41.69    2.49
  -6  -1  -2   33.88    2.59
   1  -7   2   39.20    2.69
   1  -7   2   43.17    2.53
   1  -7   2   31.79    2.81
   6   1   2   34.63    2.56
   6  -6  -2   32.07    2.01
  -6   0  -2   27.46    2.54
  -6   0  -2   29.04    2.10
  -6   0  -2   28.58    2.22
   0   6  -2   29.92    2.02
   0  -6   2   32.81    2.06
   6   0   2   31.02    2.19
   0  -6   2   22.73    2.16
   0  -6   2   29.03    2.73
   5  -6  -2    3.67    0.80
  -6   1  -2    2.73    0.88
  -6   1  -2    4.23    1.24
   1   5  -2    4.36    0.91
  -6   1  -2    4.02    1.11
  -1  -5   2    4.59    1.11
  -1  -5   2    4.30    1.26
   6  -1   2    4.10    0.89
   6  -1   2    2.70    0.91
  -1  -5   2    5.48    0.89
   4  -6  -2    8.35    1.44
   2   4  -2    9.32    1.16
  -6   2  -2   11.57    1.25
  -6   2  -2   11.28    1.42
   4  -6  -2   10.25    0.95
   4  -6  -2   11.21    1.01
   6  -2   2   12.14    1.41
  -2  -4   2   10.32    1.52
  -2  -4   2    9.71    1.32
   3   3  -2   71.19    3.53
   3  -6  -2   65.26    3.80
  -6   3  -2   69.06    3.67
   3  -6  -2   74.05    3.26
  -6   3  -2   69.47    3.53
  -3  -3   2   71.38    3.60
   6  -3   2   73.10    3.73
  -3  -3   2   76.41    4.18
  -3  -3   2   74.75    3.74
   2  -6  -2   33.30    1.82
   2  -6  -2   34.25    2.29
   2  -6  -2   33.32    2.59
   4   2  -2   28.08    1.92
   4   2  -2   32.22    2.10
   6  -4   2   33.69    2.20
  -4  -2   2   32.41    2.20
  -4  -2   2   36.47    2.64
   1  -6  -2   24.40    2.36
   5   1  -2   27.98    2.00
   1  -6  -2   28.01    2.15
   1  -6  -2   28.29    1.66
   5   1  -2   25.25    1.70
  -5  -1   2   29.01    1.74
  -1   6   2   27.50    1.57
  -5  -1   2   21.65    2.22
  -5  -1   2   27.03    1.96
   6  -5   2   27.80    2.03
   0  -6  -2   46.72    3.27
   6   0  -2   50.12    2.96
   0  -6  -2   49.08    3.11
   0  -6  -2   52.20    2.61
   0   6   2   49.14    2.51
  -6   0   2   48.92    2.55
   6  -6   2   48.93    2.86
  -6   0   2   53.64    3.42
  -6   0   2   48.67    2.85
   7  -1  -2   53.40    3.26
  -1  -6  -2   57.68    2.91
  -1  -6  -2   53.92    3.72
  -1  -6  -2   56.16    3.44
  -7   1   2   53.46    2.77
   6  -7   2   57.66    3.17
  -7   1   2   55.34    3.20
   1   6   2   55.32    2.87
  -7   1   2   55.78    3.68
  -2  -6  -2   10.33    2.04
  -2  -6  -2    9.23    1.18
  -2  -6  -2    8.38    1.57
   8  -2  -2    8.69    1.54
  -8   2   2    9.39    1.52
   6  -8   2    9.44    1.38
  -8   2   2    7.84    1.00
   2   6   2    6.56    1.10
  -3  -6  -2    0.16    0.94
  -3  -6  -2    2.20    1.70
   9  -3  -2    2.66    1.23
  -3  -6  -2    0.70    1.23
   6  -9   2    0.67    1.48
   6  -9   2    1.22    1.15
  -9   3   2    0.14    1.17
   3   6   2    1.26    0.97
  -9   3   2    1.31    0.74
  10  -4  -2    8.35    1.64
  -4  -6  -2   12.78    2.47
  -4  -6  -2   10.25    1.85
   4   6   2   10.32    1.56
 -10   4   2   10.27    1.21
 -10   4   2   11.83    1.97
   6 -10   2   13.35    2.35
   6 -10   2   13.50    1.76
  -5  -6  -2    4.03    2.19
  11  -5  -2    9.47    1.89
  -5  -6  -2    8.50    1.92
   6 -11   2    5.12    2.18
 -11   5   2    8.96    1.97
   6 -11   2    8.49    1.68
  -6  -6  -2    1.74    1.66
  12  -6  -2    0.55    1.52
  -6  -6  -2    3.03    2.19
   6 -12   2   -0.87    1.35
   6 -12   2   -1.53    1.88
 -12   6   2   -2.21    1.59
  -7  -6  -2    3.70    2.51
  13  -7  -2   -0.06    1.72
  -7  -6  -2   -0.18    1.73
   6 -13   2    2.75    2.35
   6 -13   2   -0.27    1.48
 -13   7   2   -1.97    1.83
  12  -7  -2    1.22    1.57
  -7  -5  -2    2.75    1.81
  -7  -5  -2    7.28    2.52
   5 -12   2    4.20    2.22
 -12   7   2    0.35    1.70
  -7  -4  -2   10.94    2.44
  -7  -4  -2    8.44    1.69
  11  -7  -2    7.65    1.68
  -7  -4  -2    5.82    1.88
   7   4   2    8.24    1.64
 -11   7   2   10.44    2.14
   4 -11   2    8.46    2.33
  10  -7  -2    7.45    1.61
  -7  -3  -2    7.86    1.63
  -7  -3  -2    7.28    1.76
  -7  -3  -2    8.67    2.25
 -10   7   2    7.62    1.23
   3 -10   2    6.38    2.08
   7   3   2    6.13    1.46
  -7  -2  -2    0.78    1.17
  -7  -2  -2    1.90    1.75
  -7  -2  -2    0.46    1.32
   9  -7  -2    2.88    1.23
  -2   9  -2    0.58    0.85
   2  -9   2    1.90    1.59
   7   2   2    1.01    1.18
  -1   8  -2   18.34    1.67
  -7  -1  -2   15.99    1.78
  -7  -1  -2   11.53    1.78
  -7  -1  -2   14.58    2.18
   8  -7  -2   14.65    1.60
   7   1   2   15.67    1.84
   1  -8   2   14.00    2.24
   1  -8   2   18.82    2.10
  -7   0  -2   15.57    1.70
   0   7  -2   17.84    1.65
  -7   0  -2   14.72    1.81
  -7   0  -2   15.09    2.14
   7  -7  -2   15.65    1.54
   0  -7   2   17.57    2.29
   7   0   2   14.71    1.70
   0  -7   2   19.23    2.06
   1   6  -2    3.63    1.01
  -7   1  -2    3.51    1.38
  -7   1  -2    4.62    1.07
   6  -7  -2    5.12    0.94
  -7   1  -2    5.84    1.30
  -1  -6   2    4.39    1.25
  -1  -6   2    4.82    1.00
   7  -1   2    3.57    1.17
  -1  -6   2    4.48    1.57
   2   5  -2   13.70    1.45
  -7   2  -2   12.58    1.38
   5  -7  -2   11.99    1.18
  -7   2  -2   13.03    1.63
   5  -7  -2   11.05    1.10
  -2  -5   2   13.75    1.97
   7  -2   2   11.85    1.53
  -2  -5   2   15.81    1.50
  -2  -5   2   11.68    1.53
   4  -7  -2    4.52    0.79
   3   4  -2    5.19    1.03
   4  -7  -2    5.45    1.45
  -7   3  -2    6.20    1.26
  -7   3  -2    7.00    1.14
   4  -7  -2    3.78    0.83
  -3  -4   2    4.46    1.28
  -3  -4   2    4.08    1.11
   7  -3   2    5.44    1.19
   4   3  -2   20.39    1.89
  -7   4  -2   21.60    1.99
   3  -7  -2   18.77    2.14
   3  -7  -2   21.87    1.49
  -7   4  -2   20.02    1.80
  -4  -3   2   21.38    1.93
   7  -4   2   22.06    1.95
  -4  -3   2   22.83    2.32
   2  -7  -2    8.17    1.66
   2  -7  -2    8.03    0.97
   5   2  -2    7.67    1.30
   2  -7  -2    5.40    1.32
  -2   7   2    8.64    0.82
  -5  -2   2    9.45    1.72
  -5  -2   2    9.33    1.32
   7  -5   2    7.14    1.18
   1  -7  -2   13.44    1.73
   1  -7  -2   13.16    1.98
   6   1  -2   14.63    1.60
   1  -7  -2   14.03    1.27
   7  -6   2   14.06    1.56
  -6  -1   2   12.26    1.90
  -6  -1   2   13.14    1.33
  -1   7   2   14.04    1.19
  -6  -1   2   14.16    1.61
   0  -7  -2   15.86    1.88
   7   0  -2   19.30    1.88
   7   0  -2   16.47    1.48
   0  -7  -2   14.66    2.11
   0  -7  -2   16.91    1.45
   7  -7   2   16.41    1.71
  -7   0   2   15.65    1.39
  -7   0   2   15.53    2.12
   7  -7   2   14.47    1.54
   0   7   2   16.58    1.41
  -7   0   2   15.90    1.74
   8  -1  -2    3.13    1.20
  -1  -7  -2    6.30    1.04
  -1  -7  -2    8.40    1.65
  -1  -7  -2    4.17    1.74
   8  -1  -2    5.23    0.98
  -8   1   2    3.23    1.25
  -8   1   2    5.65    0.97
   1   7   2    5.33    1.02
   7  -8   2    3.04    1.20
   7  -8   2    5.05    1.10
  -8   1   2    6.42    1.81
   9  -2  -2    4.06    1.40
  -2  -7  -2    5.13    1.93
  -2  -7  -2    4.35    1.49
   2   7   2    4.53    1.09
  -9   2   2    3.50    1.38
  -9   2   2    5.24    0.99
  -9   2   2    5.83    1.92
   7  -9   2    5.84    1.37
  10  -3  -2   16.84    2.10
  -3  -7  -2   21.95    3.01
  -3  -7  -2   20.70    2.38
 -10   3   2   20.51    1.89
   7 -10   2   18.25    2.07
 -10   3   2   22.40    2.41
 -10   3   2   18.58    2.67
  -4  -7  -2    6.69    1.77
  11  -4  -2    4.94    1.78
  -4  -7  -2    8.02    2.38
 -11   4   2    5.81    1.80
   7 -11   2    8.00    1.66
  12  -5  -2    2.17    1.67
  -5  -7  -2    2.51    1.72
  -5  -7  -2    0.41    2.07
 -12   5   2    1.13    1.70
   7 -12   2    3.68    1.55
  13  -6  -2    5.54    1.89
  -6  -7  -2   -0.34    2.28
  -6  -7  -2    2.16    1.88
 -13   6   2    2.25    2.02
   7 -13   2   -0.07    2.25
   7 -13   2    4.73    1.71
  -8  -5  -2    2.71    1.81
  -8  -5  -2    4.13    2.52
  13  -8  -2    0.79    1.75
   5 -13   2    4.71    2.50
 -13   8   2    4.68    2.18
  -8  -4  -2    2.35    2.13
  12  -8  -2   -1.56    1.45
  -8  -4  -2    0.66    1.66
  -8  -4  -2    3.64    1.49
   4 -12   2    1.08    2.16
 -12   8   2    0.89    1.87
  11  -8  -2    2.65    1.48
  -8  -3  -2    1.40    2.13
  -8  -3  -2   -0.11    1.42
  -8  -3  -2    2.82    1.51
   8   3   2    3.19    1.49
 -11   8   2    1.55    1.76
   3 -11   2    3.75    2.07
  -8  -2  -2    6.02    1.53
  10  -8  -2    7.49    1.58
  -8  -2  -2    9.56    1.88
  -8  -2  -2    8.95    2.21
   8   2   2    7.36    1.60
   2 -10   2    6.39    2.13
  -1   9  -2    6.10    1.29
  -8  -1  -2    4.41    1.90
   9  -8  -2    5.85    1.38
  -8  -1  -2    5.64    1.42
  -8  -1  -2    7.61    1.71
   8   1   2    6.54    1.58
   1  -9   2    5.68    1.98
   1  -9   2    3.13    1.52
  -8   0  -2   11.62    1.56
  -8   0  -2   11.23    1.83
   0   8  -2   12.30    1.52
  -8   0  -2   13.58    2.15
   8  -8  -2   11.37    1.49
   8   0   2   11.44    1.72
   0  -8   2   10.78    1.84
   0  -8   2   10.07    2.12
  -8   1  -2   18.87    2.41
  -8   1  -2   27.36    2.24
  -8   1  -2   23.21    2.25
   7  -8  -2   27.67    2.07
   1   7  -2   21.61    2.02
   8  -1   2   29.06    2.57
  -1  -7   2   24.05    2.42
  -1  -7   2   19.81    2.70
  -1  -7   2   31.86    2.31
  -8   2  -2   26.71    2.40
   6  -8  -2   28.33    2.03
   2   6  -2   28.31    2.24
   6  -8  -2   29.59    1.90
  -8   2  -2   26.30    2.18
  -8   2  -2   25.40    2.55
   8  -2   2   30.30    2.49
  -2  -6   2   30.55    3.00
  -2  -6   2   29.73    2.56
   5  -8  -2   16.79    2.16
  -8   3  -2   16.16    1.64
   3   5  -2   17.00    1.73
   5  -8  -2   16.86    1.56
   5  -8  -2   17.46    1.46
  -8   3  -2   17.74    1.94
  -3  -5   2   21.03    2.02
  -3  -5   2   16.42    2.26
   8  -3   2   13.45    1.61
   4   4  -2    5.19    1.19
  -8   4  -2    4.19    1.38
   4  -8  -2    2.51    1.49
  -8   4  -2    2.97    1.13
   4  -8  -2    3.97    0.82
  -4  -4   2    3.12    1.34
   8  -4   2    1.82    1.08
  -4  -4   2    3.31    1.13
   3  -8  -2   10.41    1.89
   3  -8  -2   11.41    1.19
  -8   5  -2   12.61    1.77
  -8   5  -2    9.65    1.48
   5   3  -2    9.73    1.49
  -5  -3   2    8.73    1.85
   8  -5   2    9.11    1.43
  -5  -3   2   10.68    1.54
   6   2  -2   11.13    1.52
   2  -8  -2    9.40    1.90
   2  -8  -2   13.53    1.26
   2  -8  -2   10.32    1.70
  -6  -2   2   12.34    1.63
  -2   8   2   12.60    1.11
   8  -6   2   10.55    1.46
  -6  -2   2   11.43    2.01
   1  -8  -2   14.45    1.31
   1  -8  -2    9.93    1.68
   1  -8  -2    8.46    1.96
   7   1  -2   11.49    1.56
  -7  -1   2   14.93    1.79
   8  -7   2   10.31    1.52
  -7  -1   2   12.88    2.12
  -1   8   2   13.57    1.21
  -7  -1   2   13.92    1.41
   0  -8  -2    0.49    1.48
   0  -8  -2    1.14    1.32
   8   0  -2    0.74    1.17
  -8   0   2    0.28    1.52
  -8   0   2   -0.65    1.13
  -8   0   2   -0.53    0.81
   0   8   2    0.45    0.75
   8  -8   2    0.87    1.12
  -1  -8  -2    4.65    1.87
  -1  -8  -2    2.39    1.42
   9  -1  -2    4.04    1.50
  -9   1   2    5.28    1.93
  -9   1   2    3.65    1.41
   8  -9   2    3.99    1.35
  -9   1   2    4.74    1.04
  -2  -8  -2   22.84    3.03
  -2  -8  -2   16.20    2.38
  10  -2  -2   19.28    2.22
 -10   2   2   16.45    2.16
 -10   2   2   16.50    2.68
 -10   2   2   17.34    2.27
   8 -10   2   18.59    2.13
  -3  -8  -2   15.96    2.85
  -3  -8  -2   15.47    2.35
  11  -3  -2   16.40    2.30
 -11   3   2   14.73    2.19
 -11   3   2   16.47    2.86
   8 -11   2   15.97    2.11
  12  -4  -2    7.98    2.05
  -4  -8  -2    0.83    2.21
  -4  -8  -2    3.96    1.84
 -12   4   2    6.32    1.93
 -12   4   2    6.57    2.42
   8 -12   2    4.94    1.68
  -5  -8  -2    1.06    1.85
  -5  -8  -2    4.27    2.69
  13  -5  -2    5.93    2.00
   8 -13   2    6.22    1.78
 -13   5   2    8.25    2.79
 -13   5   2    3.51    2.02
  -9  -4  -2   12.28    2.99
  13  -9  -2   10.42    2.12
  -9  -4  -2    9.20    2.40
   4 -13   2   10.93    2.89
 -13   9   2   10.83    2.57
  -9  -3  -2   -0.39    2.21
  -9  -3  -2    2.23    1.52
  -9  -3  -2    1.36    1.69
  12  -9  -2    1.34    1.56
   9   3   2   -0.67    1.44
   3 -12   2    2.71    2.29
 -12   9   2   -0.63    1.79
  -9  -2  -2    5.05    1.63
  11  -9  -2    4.94    1.63
  -9  -2  -2    3.74    1.83
  -9  -2  -2    2.21    2.04
   2 -11   2    6.68    2.24
   9   2   2    3.00    1.59
  -9  -1  -2   10.76    1.81
  10  -9  -2   11.30    1.71
  -9  -1  -2    9.51    2.05
  -9  -1  -2    7.93    2.27
   9   1   2   10.89    1.86
   1 -10   2    9.39    2.37
  -9   0  -2   10.80    2.23
  -9   0  -2   12.42    1.72
  -9   0  -2   10.38    1.94
   9  -9  -2   11.04    1.62
   0  -9   2   10.12    2.01
   9   0   2    9.83    1.86
   0  -9   2   13.11    2.47
   1   8  -2   12.20    1.56
  -9   1  -2   10.55    1.88
  -9   1  -2    9.09    2.06
   8  -9  -2    9.61    1.47
  -9   1  -2    9.31    1.57
  -1  -8   2   10.68    2.21
   9  -1   2    8.83    1.62
  -1  -8   2    6.96    1.70
  -9   2  -2    3.62    1.44
   7  -9  -2    5.23    1.14
   2   7  -2    2.53    1.10
  -9   2  -2    3.65    1.76
  -9   2  -2    3.35    1.23
  -2  -7   2    2.15    1.32
   9  -2   2    4.10    1.42
  -2  -7   2   -0.20    1.54
   3   6  -2   36.43    2.62
  -9   3  -2   39.58    3.03
   6  -9  -2   36.05    2.42
  -9   3  -2   33.10    2.53
  -3  -6   2   32.07    3.20
  -3  -6   2   34.53    2.70
   9  -3   2   33.79    2.79
  -9   4  -2   27.67    2.61
  -9   4  -2   27.25    2.39
   5  -9  -2   32.20    2.23
   4   5  -2   31.85    2.51
   5  -9  -2   27.09    2.92
   5  -9  -2   33.83    2.32
  -4  -5   2   35.15    3.19
   9  -4   2   29.76    2.71
  -4  -5   2   30.36    2.64
  -9   5  -2    6.53    1.42
   4  -9  -2    7.36    1.15
  -9   5  -2    7.65    1.68
   4  -9  -2    8.96    1.98
   5   4  -2    7.37    1.42
  -5  -4   2    9.18    1.91
  -5  -4   2    7.46    1.53
   9  -5   2    8.21    1.46
  -9   6  -2   38.70    3.00
   6   3  -2   32.59    2.73
  -9   6  -2   33.38    2.77
   3  -9  -2   35.66    3.37
  -6  -3   2   36.26    3.36
   9  -6   2   37.99    2.91
  -6  -3   2   39.14    2.89
   2  -9  -2   23.93    2.80
   2  -9  -2   18.26    2.33
   7   2  -2   23.34    2.30
  -7  -2   2   20.64    2.24
  -7  -2   2   18.61    2.55
   9  -7   2   21.53    2.13
   8   1  -2   12.33    1.76
   1  -9  -2   12.24    2.34
   1  -9  -2   11.87    2.04
  -8  -1   2   15.67    2.45
  -8  -1   2   10.40    1.76
   9  -8   2    9.74    1.69
  -8  -1   2   10.98    1.38
   0  -9  -2   10.30    1.94
   9   0  -2    4.51    1.56
   0  -9  -2    4.55    2.02
  -9   0   2    8.28    1.22
   9  -9   2    7.06    1.61
  -9   0   2    6.89    1.68
  -9   0   2    7.05    2.13
  -1  -9  -2   11.03    2.55
  -1  -9  -2   15.36    2.33
  10  -1  -2   13.69    2.05
 -10   1   2   14.96    2.60
 -10   1   2   14.46    2.13
   9 -10   2   13.24    2.01
  11  -2  -2   16.99    2.32
  -2  -9  -2   15.69    2.46
  -2  -9  -2   20.42    3.15
 -11   2   2   16.35    2.89
 -11   2   2   19.80    2.53
   9 -11   2   22.71    2.42
  12  -3  -2    2.65    1.81
  -3  -9  -2    8.41    2.18
  -3  -9  -2    6.70    2.59
 -12   3   2    5.09    2.35
   9 -12   2    4.46    1.76
 -12   3   2    6.74    2.02
  -4  -9  -2    0.18    2.37
  13  -4  -2    1.76    1.83
  -4  -9  -2    0.43    1.76
   9 -13   2    1.14    1.65
 -13   4   2   -1.39    1.85
 -13   4   2   -0.42    2.20
 -10  -2  -2    2.68    1.92
 -10  -2  -2    1.68    2.35
  12 -10  -2    0.42    1.47
 -10  -2  -2    2.05    1.57
   2 -12   2    0.36    2.18
  10   2   2    2.38    1.77
 -10  -1  -2   11.49    2.32
  11 -10  -2   12.75    1.96
 -10  -1  -2   13.34    2.83
 -10  -1  -2   12.47    1.96
  10   1   2    8.62    1.95
   1 -11   2   10.13    2.64
 -10   0  -2   18.85    2.56
 -10   0  -2   15.27    2.03
  10 -10  -2   19.99    2.17
 -10   0  -2   17.27    2.88
   0 -10   2   21.26    3.15
  10   0   2   21.09    2.45
   0 -10   2   21.01    2.69
 -10   1  -2   10.88    2.05
 -10   1  -2    9.00    2.21
   9 -10  -2   10.13    1.61
 -10   1  -2   11.65    1.75
  10  -1   2   12.30    2.01
  -1  -9   2    9.09    1.90
  -1  -9   2   11.66    2.51
   8 -10  -2    0.61    1.13
 -10   2  -2   -0.70    1.09
 -10   2  -2    1.95    1.84
 -10   2  -2    1.29    1.51
  -2  -8   2    0.45    1.77
  -2  -8   2    2.30    1.53
  10  -2   2    1.38    1.47
   3   7  -2   25.83    2.35
 -10   3  -2   19.52    2.43
 -10   3  -2   24.62    2.18
 -10   3  -2   19.25    2.68
   7 -10  -2   26.87    2.23
  -3  -7   2   24.04    3.04
  -3  -7   2   28.43    2.70
  10  -3   2   22.60    2.35
   4   6  -2   13.53    1.76
   6 -10  -2   13.96    2.38
 -10   4  -2   11.40    1.61
 -10   4  -2   11.44    2.05
   6 -10  -2   14.85    1.58
  -4  -6   2   14.11    1.97
  10  -4   2   12.12    1.81
  -4  -6   2   15.02    2.67
 -10   5  -2    2.22    1.17
 -10   5  -2    3.27    1.58
   5 -10  -2    0.96    1.67
   5 -10  -2    2.43    1.05
   5   5  -2    2.29    1.28
  -5  -5   2    3.18    1.86
  -5  -5   2    4.13    1.49
  10  -5   2    2.50    1.47
   4 -10  -2    2.15    1.76
   6   4  -2   -0.57    1.10
 -10   6  -2    1.45    1.52
 -10   6  -2    0.44    1.15
  -6  -4   2    0.12    1.25
  -6  -4   2   -1.07    1.56
  10  -6   2    0.55    1.30
   7   3  -2    2.04    1.37
 -10   7  -2    3.83    1.42
   3 -10  -2    3.81    1.85
 -10   7  -2    4.22    1.65
  -7  -3   2    2.98    1.44
  10  -7   2    4.97    1.50
  -7  -3   2    0.67    1.71
   2 -10  -2    4.47    1.73
   2 -10  -2    1.85    1.82
   8   2  -2    5.02    1.48
  -8  -2   2    6.60    1.65
  -8  -2   2    6.30    2.12
  10  -8   2    3.42    1.48
   9   1  -2    1.32    1.44
   1 -10  -2    2.82    1.74
   1 -10  -2    4.39    2.12
  -9  -1   2    0.73    1.43
  -9  -1   2   -1.44    1.78
  10  -9   2    1.01    1.43
   0 -10  -2    3.01    1.71
   0 -10  -2    1.42    2.04
  10   0  -2    2.19    1.45
  10 -10   2   -2.12    1.46
 -10   0   2    0.96    1.48
 -10   0   2    1.32    2.04
  -1 -10  -2   10.05    2.23
  11  -1  -2   14.31    2.27
  -1 -10  -2   11.78    2.79
  10 -11   2   10.19    2.01
 -11   1   2    7.84    2.05
 -11   1   2    7.05    2.37
  -2 -10  -2    2.38    2.40
  12  -2  -2    1.55    1.77
  -2 -10  -2    6.25    2.09
 -12   2   2    4.71    1.94
 -12   2   2    3.82    2.41
  10 -12   2    4.98    1.77
 -11  -1  -2   -3.32    1.72
 -11  -1  -2   -1.02    2.34
  12 -11  -2    2.06    1.72
   1 -12   2    3.61    2.52
  11   1   2    1.32    1.69
  11 -11  -2    1.82    1.51
 -11   0  -2    6.27    2.49
 -11   0  -2    5.16    1.97
   0 -11   2    6.56    2.50
  11   0   2    6.06    1.84
   0 -11   2    0.50    1.74
 -11   1  -2    3.78    1.56
  10 -11  -2    3.30    1.43
 -11   1  -2    2.47    1.87
 -11   1  -2    4.51    2.14
  11  -1   2    6.12    1.83
  -1 -10   2    4.48    1.90
  -1 -10   2    2.64    2.24
 -11   2  -2    1.16    1.33
 -11   2  -2    4.22    2.18
   9 -11  -2    3.65    1.32
 -11   2  -2    0.45    1.62
  11  -2   2    1.82    1.61
  -2  -9   2    2.10    2.04
  -2  -9   2    1.19    1.49
 -11   3  -2    3.42    1.32
 -11   3  -2    5.79    1.89
   8 -11  -2    4.03    1.31
 -11   3  -2    6.60    2.29
  11  -3   2    2.06    1.58
  -3  -8   2    6.01    2.31
  -3  -8   2    7.43    1.85
 -11   4  -2    0.65    1.14
 -11   4  -2    0.79    1.51
   7 -11  -2    1.69    1.12
   4   7  -2   -0.38    1.28
  -4  -7   2    1.88    1.97
  11  -4   2   -2.65    1.39
  -4  -7   2    1.48    1.48
   5   6  -2    0.53    1.23
   6 -11  -2    2.71    1.99
 -11   5  -2    2.62    1.18
   6 -11  -2    2.34    1.09
 -11   5  -2    0.44    1.64
  -5  -6   2    3.89    2.03
  -5  -6   2    2.28    1.56
  11  -5   2    2.28    1.50
   5 -11  -2   10.40    1.49
   5 -11  -2    7.78    2.20
   6   5  -2    9.04    1.70
 -11   6  -2   12.18    2.24
 -11   6  -2    8.68    1.55
  -6  -5   2    7.36    2.20
  -6  -5   2    9.12    1.83
  11  -6   2    5.33    1.69
 -11   7  -2    4.09    1.44
 -11   7  -2    0.68    1.73
   7   4  -2    1.23    1.35
   4 -11  -2    4.67    2.11
  -7  -4   2    2.07    1.96
  11  -7   2    0.98    1.54
  -7  -4   2    1.42    1.43
   3 -11  -2    2.90    2.01
 -11   8  -2    3.97    1.81
   8   3  -2    3.05    1.50
 -11   8  -2    2.64    1.53
  11  -8   2    2.03    1.59
  -8  -3   2    3.86    2.14
  -8  -3   2    2.79    1.56
   2 -11  -2   11.46    2.59
   9   2  -2    6.54    1.79
  11  -9   2    6.77    1.87
  -9  -2   2    9.92    2.01
  -9  -2   2    9.20    2.54
   1 -11  -2    7.96    2.47
   1 -11  -2    9.77    2.18
  10   1  -2   10.12    2.04
 -10  -1   2    9.04    2.09
  11 -10   2    8.82    1.98
 -10  -1   2   11.05    2.73
   0 -11  -2    0.54    2.20
   0 -11  -2    1.55    1.87
  11   0  -2    3.40    1.79
 -11   0   2    5.76    2.46
  11 -11   2    2.89    1.75
 -11   0   2    5.15    1.96
  12  -1  -2    2.65    1.88
  -1 -11  -2   -0.63    1.77
  -1 -11  -2    5.68    2.74
 -12   1   2    0.50    2.39
 -12   1   2   -0.69    1.79
  11 -12   2    0.19    1.65
  11 -12  -2    0.15    1.49
 -12   1  -2    3.14    2.05
 -12   1  -2   -4.00    2.06
  -1 -11   2    0.46    1.84
  -1 -11   2    0.19    2.40
  12  -1   2    1.69    1.75
 -12   2  -2    4.54    2.35
  10 -12  -2    3.03    1.49
 -12   2  -2   -0.32    1.78
  -2 -10   2    0.95    1.66
  12  -2   2   -0.36    1.56
  -2 -10   2   -0.26    2.09
 -12   3  -2    8.25    2.13
   9 -12  -2    8.43    1.66
 -12   3  -2    5.51    2.44
  -3  -9   2    8.95    2.77
  12  -3   2    4.66    1.81
  -3  -9   2    9.32    2.11
 -12   4  -2    5.88    2.04
 -12   4  -2    2.89    2.12
   8 -12  -2    1.46    1.25
  -4  -8   2    4.94    1.78
  12  -4   2    4.64    1.84
  -4  -8   2    5.52    2.38
   7 -12  -2    1.44    1.16
 -12   5  -2    3.00    1.80
  -5  -7   2   -0.90    1.94
  -5  -7   2    0.17    1.49
  12  -5   2   -2.26    1.44
   6 -12  -2   18.13    1.86
 -12   6  -2   13.93    2.60
   6 -12  -2   19.53    3.04
  12  -6   2   15.63    2.39
  -6  -6   2   17.59    2.53
  -6  -6   2   18.57    3.10
 -12   7  -2   12.00    2.47
   5 -12  -2   10.42    1.57
   5 -12  -2   12.31    2.68
   7   5  -2   11.83    2.04
  -7  -5   2   14.26    2.96
  12  -7   2   10.06    2.02
  -7  -5   2   10.62    2.06
 -12   8  -2    6.68    2.29
   8   4  -2   13.47    2.12
   4 -12  -2   12.47    2.78
  -8  -4   2   10.96    2.10
  -8  -4   2    9.36    2.70
  12  -8   2    7.08    1.95
   3 -12  -2    1.46    2.15
 -12   9  -2    7.72    2.35
   9   3  -2    7.12    2.06
  -9  -3   2    5.41    2.46
  -9  -3   2    8.12    2.06
  12  -9   2    4.77    1.75
   2 -12  -2    8.15    2.67
  10   2  -2   14.06    2.30
 -10  -2   2    8.44    2.17
  12 -10   2    7.34    2.04
 -10  -2   2   11.93    2.95
   1 -12  -2   11.51    3.00
  11   1  -2   16.60    2.41
   1 -12  -2    8.87    2.44
 -11  -1   2   11.58    2.42
 -11  -1   2   11.70    2.99
  12 -11   2   15.77    2.44
   9 -13  -2   12.60    1.83
 -13   4  -2   13.22    2.99
 -13   4  -2   15.63    2.80
  -4  -9   2   15.68    2.61
  -4  -9   2   14.98    3.24
  13  -4   2   12.28    2.23
 -13   5  -2    1.86    2.07
   8 -13  -2    1.30    1.26
 -13   5  -2    0.62    2.35
  -5  -8   2    3.99    2.51
  13  -5   2    6.72    1.97
  -5  -8   2    4.36    1.88
   7 -13  -2    5.04    1.38
 -13   6  -2    5.47    2.29
  13  -6   2    5.21    1.88
  -6  -7   2    2.65    2.44
  -6  -7   2    4.25    1.95
 -13   7  -2   13.99    2.75
   6 -13  -2   13.86    1.77
   6 -13  -2    8.88    2.83
  13  -7   2   10.35    2.18
  -7  -6   2   16.03    3.18
  -7  -6   2    9.77    2.23
   5 -13  -2    7.26    1.49
 -13   8  -2    8.16    2.55
   5 -13  -2    6.60    2.47
  -8  -5   2    5.93    2.63
  13  -8   2    6.20    2.10
  -8  -5   2   10.91    2.25
 -13   9  -2    1.30    2.29
   9   4  -2    7.66    2.17
   4 -13  -2    4.47    2.50
  -9  -4   2    4.05    1.85
  -9  -4   2    2.10    2.48
  13  -9   2    3.46    1.99
   0   0  -3  567.16   21.96
   0   0  -3  524.13   22.05
   0   0   3  580.91   22.18
   0   0   3  521.23   22.25
  -1   0  -3  390.09   15.82
   1  -1  -3  408.78   15.74
  -1   0  -3  367.02   15.72
   1  -1  -3  381.80   15.72
   0   1  -3  376.57   15.85
  -1   0  -3  387.15   15.88
   0   1  -3  406.37   15.84
  -1   0  -3  381.90   15.81
   0   1  -3  403.58   15.76
  -1   1   3  393.79   15.55
   1   0   3  386.03   15.62
  -1   1   3  386.76   15.54
   0  -1   3  390.54   15.64
   1   0   3  371.65   15.60
  -1   1   3  381.05   15.52
   0  -1   3  380.50   15.65
   1   0  -3   30.23    1.28
  -1   1  -3   30.73    1.53
   0  -1  -3   30.04    1.50
   0  -1  -3   26.31    1.32
   0  -1  -3   29.44    1.49
  -1   1  -3   30.66    1.42
   1   0  -3   28.02    1.49
   0  -1  -3   28.90    1.35
   0  -1  -3   32.93    1.58
   0   1   3   28.21    1.52
  -1   0   3   32.16    1.33
   0   1   3   30.79    1.38
   0   1   3   32.41    1.52
   1  -1   3   31.13    1.60
   1  -1   3   31.35    1.47
   0   1   3   28.26    1.38
   0   1   3   34.62    1.61
  -1  -1  -3   51.11    2.28
   2  -1  -3   49.40    2.30
  -1  -1  -3   47.92    2.40
  -1  -1  -3   51.96    2.45
  -1   2  -3   51.64    2.43
  -1  -1  -3   46.94    2.40
  -1   2  -3   55.04    2.50
  -2   1   3   50.83    2.29
   1  -2   3   52.07    2.44
   1   1   3   49.49    2.39
   1   1   3   51.60    2.28
   1   1   3   48.71    2.41
   1  -2   3   51.86    2.50
  -2  -1  -3   37.19    2.17
  -1   3  -3   42.30    2.10
  -2  -1  -3   39.28    1.96
  -2  -1  -3   38.72    2.21
  -2  -1  -3   36.39    2.11
  -1   3  -3   40.32    2.08
  -1   3  -3   40.11    2.22
   3  -2  -3   39.18    1.94
   2   1   3   34.13    1.85
   1  -3   3   38.94    2.21
   2   1   3   33.12    1.97
   1  -3   3   37.78    2.00
  -3   2   3   36.87    1.79
   2   1   3   34.24    1.97
   2   1   3   35.67    1.97
  -3   2   3   39.69    1.57
  -2   0  -3   32.72    1.67
   0   2  -3   31.68    1.86
  -2   0  -3   30.77    1.71
  -2   0  -3   31.16    1.74
   0   2  -3   30.27    1.64
   0   2  -3   29.26    1.69
  -2   0  -3   28.68    1.81
   2  -2  -3   29.56    1.44
   2   0   3   27.62    1.76
  -2   2   3   34.07    1.48
   2   0   3   31.82    1.76
  -2   2   3   30.22    1.45
   0  -2   3   33.12    1.74
   0  -2   3   33.31    1.95
   0  -2   3   30.53    1.78
   2   0   3   30.90    1.70
   1   1  -3   61.14    2.87
   1  -2  -3   60.15    2.68
   1  -2  -3   59.59    2.77
  -2   1  -3   60.62    2.81
  -2   1  -3   59.89    2.82
   1   1  -3   64.04    2.66
   1   1  -3   59.43    2.78
   1  -2  -3   54.26    2.80
  -1   2   3   65.91    2.72
   2  -1   3   57.66    2.82
  -1   2   3   57.37    2.75
  -1  -1   3   59.03    2.78
  -1  -1   3   61.39    2.69
  -1   2   3   59.46    2.84
  -1  -1   3   63.17    2.91
   0  -2  -3   68.86    3.23
   0  -2  -3   69.66    3.10
   2   0  -3   67.96    3.09
   2   0  -3   65.83    2.97
   0  -2  -3   66.54    2.85
  -2   2  -3   71.31    3.13
   0  -2  -3   67.70    3.16
   0   2   3   65.48    3.09
   0   2   3   61.00    2.80
  -2   0   3   67.36    2.93
   0   2   3   66.63    3.15
   2  -2   3   69.31    3.11
   0   2   3   68.50    3.08
  -2   0   3   69.77    3.03
  -2   0   3   74.47    3.28
  -1  -2  -3  177.11    7.35
  -1  -2  -3  166.69    7.45
  -1  -2  -3  167.15    7.40
  -2   3  -3  174.59    7.44
   3  -1  -3  174.10    7.28
  -2   3  -3  176.29    7.34
  -1  -2  -3  174.92    7.17
   1   2   3  174.85    7.14
   1   2   3  161.23    6.90
   2  -3   3  171.30    7.19
  -3   1   3  164.98    6.97
   1   2   3  164.10    7.18
   2  -3   3  165.45    7.08
  -2  -2  -3   32.24    1.71
  -2   4  -3   34.38    1.89
  -2  -2  -3   30.09    2.03
   4  -2  -3   30.22    1.78
  -2  -2  -3   29.76    1.88
  -2  -2  -3   30.32    2.01
   2   2   3   26.35    1.81
   2  -4   3   33.90    2.14
  -4   2   3   32.00    1.70
   2   2   3   29.77    1.69
   2  -4   3   32.84    1.86
   2   2   3   32.01    2.02
  -3  -2  -3   10.49    1.45
  -3  -2  -3   10.20    1.00
  -2   5  -3   11.35    1.12
   5  -3  -3   10.93    1.06
  -3  -2  -3    9.98    1.18
  -3  -2  -3    8.00    1.19
   3   2   3   11.10    1.04
   3   2   3   10.51    1.33
  -5   3   3    8.69    0.81
   2  -5   3   10.30    1.43
   2  -5   3   10.19    1.08
   4  -3  -3   57.85    2.69
  -3  -1  -3   56.47    2.90
  -3  -1  -3   50.97    2.95
  -3  -1  -3   57.94    2.87
  -1   4  -3   57.32    2.82
  -3  -1  -3   54.52    2.70
   3   1   3   53.02    2.70
   1  -4   3   57.25    2.78
  -4   3   3   53.87    2.58
   1  -4   3   57.50    3.08
   3   1   3   52.60    2.85
   3  -3  -3   27.00    1.42
  -3   0  -3   26.54    1.60
   0   3  -3   27.45    1.85
   0   3  -3   26.56    1.64
  -3   0  -3   25.58    1.76
  -3   0  -3   28.55    1.79
  -3   0  -3   26.94    1.76
   0   3  -3   26.06    1.62
   0  -3   3   28.00    1.70
   0  -3   3   27.74    1.95
  -3   3   3   26.75    1.80
  -3   3   3   24.28    1.37
   0  -3   3   28.53    1.72
   3   0   3   27.26    1.66
  -3   3   3   28.40    1.39
   3   0   3   27.95    1.71
  -3   1  -3    2.41    0.74
   2  -3  -3    1.38    0.78
   1   2  -3    2.29    0.78
   1   2  -3    2.58    0.69
   2  -3  -3    1.98    0.36
  -3   1  -3    1.56    0.71
  -3   1  -3    2.42    0.61
   1   2  -3    1.22    0.57
   3  -1   3    2.06    0.62
  -2   3   3    1.67    0.74
  -2   3   3    2.07    0.62
   3  -1   3    2.65    0.65
  -1  -2   3    0.91    0.80
  -1  -2   3    2.08    0.64
  -2   3   3    2.69    0.52
  -1  -2   3    2.23    0.64
   2   1  -3    6.65    0.82
   1  -3  -3    5.22    0.87
   1  -3  -3    5.73    0.48
   1  -3  -3    5.62    1.03
   1  -3  -3    7.83    0.80
   2   1  -3    7.67    0.76
   2   1  -3    7.70    1.04
  -3   2  -3    7.79    0.85
   2   1  -3    7.68    0.67
   3  -2   3    7.84    0.90
  -2  -1   3    9.34    0.83
  -2  -1   3    8.18    0.84
  -1   3   3    6.42    0.86
  -1   3   3    7.68    0.78
  -2  -1   3    8.13    1.10
  -1   3   3    5.70    0.92
   0  -3  -3  432.30   17.29
   0  -3  -3  417.05   17.45
   3   0  -3  424.17   17.06
  -3   3  -3  422.45   17.36
   0  -3  -3  408.11   17.37
   0  -3  -3  422.49   17.05
   3   0  -3  410.35   17.27
   3   0  -3  431.42   17.19
   0   3   3  417.28   17.46
  -3   0   3  422.98   17.30
   0   3   3  425.46   17.55
   3  -3   3  422.34   17.46
   0   3   3  419.38   17.38
   3  -3   3  442.66   17.42
   0   3   3  400.00   17.14
  -3   0   3  443.95   17.61
   4  -1  -3  224.21    9.58
  -1  -3  -3  247.12   10.05
   4  -1  -3  228.21    9.87
  -1  -3  -3  237.39    9.93
  -1  -3  -3  246.59   10.18
  -1  -3  -3  231.98    9.70
  -4   1   3  241.28   10.02
  -4   1   3  256.02    9.74
   1   3   3  226.64   10.27
   1   3   3  235.73    9.89
   1   3   3  224.46   10.13
   3  -4   3  249.44   10.28
   3  -4   3  242.23   10.09
  -3   5  -3   15.72    1.30
  -2  -3  -3   12.93    1.57
  -3   5  -3   15.27    2.26
  -2  -3  -3   14.01    1.15
   5  -2  -3   17.14    1.39
  -2  -3  -3   12.81    1.38
  -2  -3  -3   15.04    1.40
  -5   2   3   15.00    0.88
   3  -5   3   15.59    1.36
   2   3   3   14.50    1.54
  -5   2   3   17.33    1.38
   2   3   3   16.12    1.25
   3  -5   3   15.45    1.68
  -3  -3  -3   71.30    3.86
  -3  -3  -3   76.79    3.57
  -3  -3  -3   71.62    4.10
  -3   6  -3   79.28    3.68
   6  -3  -3   75.73    3.70
  -3  -3  -3   75.09    3.76
   3  -6   3   80.82    3.67
   3   3   3   73.00    3.51
  -6   3   3   74.86    3.65
   3  -6   3   72.11    4.02
  -6   3   3   67.36    3.15
  -4  -3  -3  110.77    5.88
  -4  -3  -3  123.32    5.73
  -3   7  -3  123.74    5.43
  -4  -3  -3  104.42    5.29
   7  -4  -3  121.26    5.47
  -4  -3  -3  118.86    5.55
  -7   4   3  117.21    5.07
   4   3   3  118.98    5.44
   3  -7   3  119.56    5.51
  -7   4   3  119.50    5.61
   3  -7   3  115.24    6.01
  -2   6  -3   28.76    1.92
  -4  -2  -3   29.38    2.13
  -4  -2  -3   27.73    2.30
   6  -4  -3   29.90    1.93
  -4  -2  -3   27.15    1.96
   2  -6   3   32.68    2.52
   4   2   3   27.31    1.98
   2  -6   3   31.46    2.02
  -4  -1  -3   25.63    1.95
  -1   5  -3   23.30    1.70
  -4  -1  -3   23.38    2.03
  -4  -1  -3   24.21    1.88
   5  -4  -3   26.65    1.70
   1  -5   3   25.23    2.17
   4   1   3   23.94    1.75
   1  -5   3   27.28    1.77
   1  -5   3   24.67    1.93
  -4   0  -3   22.53    1.84
   0   4  -3   21.58    1.58
  -4   0  -3   22.72    1.73
   0   4  -3   23.05    1.68
  -4   0  -3   21.03    1.77
   4  -4  -3   22.85    1.39
   0   4  -3   23.82    1.91
   0  -4   3   22.39    1.63
   0  -4   3   21.47    1.54
   4   0   3   20.97    1.60
   0  -4   3   21.67    1.94
  -4   4   3   22.49    1.29
   4   0   3   15.83    1.46
  -4   4   3   21.03    1.74
   3  -4  -3  102.47    4.37
   1   3  -3  102.80    4.66
  -4   1  -3  100.99    4.68
   1   3  -3  104.89    4.88
   1   3  -3  100.96    4.62
  -4   1  -3  104.12    4.75
  -1  -3   3  101.90    4.23
   4  -1   3   94.44    4.21
  -3   4   3   89.08    4.18
  -1  -3   3   89.58    4.40
  -1  -3   3   96.55    4.18
   4  -1   3   73.53    4.07
  -3   4   3   91.02    4.36
  -4   2  -3   12.02    1.17
   2   2  -3    8.99    0.92
   2   2  -3   11.06    0.97
   2   2  -3    9.49    0.97
   2  -4  -3    7.85    0.67
  -4   2  -3    8.45    1.08
   2  -4  -3    8.01    1.06
   2  -4  -3   10.92    1.31
  -2  -2   3   10.99    1.09
  -2   4   3   11.17    0.98
  -2   4   3   10.30    1.12
  -2  -2   3   13.21    1.13
   4  -2   3   10.27    1.06
  -2   4   3   11.46    1.28
  -2  -2   3   10.69    1.28
   1  -4  -3  228.98   10.21
  -4   3  -3  231.78   10.00
   3   1  -3  237.96    9.88
   1  -4  -3  242.57    9.95
   1  -4  -3  230.99    9.67
   3   1  -3  231.22   10.15
   3   1  -3  234.19    9.96
   3   1  -3  243.13    9.80
   1  -4  -3  251.08   10.13
  -1   4   3  232.56    9.94
  -3  -1   3  249.66   10.25
   4  -3   3  248.15   10.05
  -1   4   3  234.10   10.19
  -1   4   3  228.01    9.58
  -1   4   3  227.15   10.03
  -3  -1   3  239.98    9.90
   0  -4  -3   62.68    3.10
   0  -4  -3   64.10    3.28
  -4   4  -3   59.43    3.16
   0  -4  -3   61.43    3.38
   4   0  -3   61.94    3.09
   4   0  -3   59.47    2.79
   4   0  -3   64.62    3.02
   0  -4  -3   63.17    2.78
   4  -4   3   63.81    3.25
   0   4   3   64.67    3.45
  -4   0   3   66.90    3.51
  -4   0   3   64.70    3.12
   0   4   3   61.39    2.83
   4  -4   3   65.27    3.16
  -4   0   3   66.77    3.10
   0   4   3   63.80    3.29
   0   4   3   59.83    3.24
  -1  -4  -3   64.51    2.90
   5  -1  -3   64.03    3.17
  -1  -4  -3   64.86    3.40
  -1  -4  -3   63.88    3.23
  -1  -4  -3   55.91    3.47
   5  -1  -3   58.56    2.77
   1   4   3   64.03    2.93
  -5   1   3   64.58    3.18
   4  -5   3   63.19    3.46
  -5   1   3   60.72    2.78
   4  -5   3   63.89    3.30
   4  -5   3   63.08    3.17
  -2  -4  -3    2.65    0.66
  -2  -4  -3    3.45    1.25
   6  -2  -3    2.78    0.82
  -2  -4  -3    2.52    1.02
  -2  -4  -3    4.31    1.01
  -6   2   3    1.69    0.87
   4  -6   3    1.79    0.73
  -6   2   3    1.87    0.46
   4  -6   3    3.18    1.10
   2   4   3    3.63    0.77
  -3  -4  -3    2.63    1.10
   7  -3  -3    5.82    1.12
  -3  -4  -3    7.14    1.50
  -3  -4  -3    4.34    1.12
  -3  -4  -3    4.08    0.79
  -7   3   3    5.48    0.63
   3   4   3    4.92    0.92
   4  -7   3    5.66    1.45
  -7   3   3    6.00    1.18
   4  -7   3    4.01    0.92
   8  -4  -3   72.48    3.87
  -4  -4  -3   70.39    4.45
  -4  -4  -3   71.88    4.14
  -4  -4  -3   69.12    3.87
  -4  -4  -3   73.81    3.66
  -8   4   3   63.26    3.03
   4  -8   3   68.97    4.19
  -8   4   3   67.55    3.73
   4   4   3   66.96    3.48
  -5  -4  -3   15.81    1.90
   9  -5  -3   16.49    1.84
  -5  -4  -3   14.33    1.96
  -5  -4  -3   17.93    2.37
   5   4   3   20.58    1.85
   4  -9   3   13.13    2.20
   4  -9   3   16.05    1.93
  -9   5   3   16.00    1.34
  -9   5   3   18.50    2.03
   8  -5  -3   45.19    2.86
  -3   8  -3   46.59    2.72
  -5  -3  -3   43.17    2.95
  -5  -3  -3   45.87    3.49
  -5  -3  -3   43.12    3.05
   3  -8   3   43.16    3.35
  -8   5   3   42.51    2.23
   5   3   3   39.46    2.64
   7  -5  -3    8.14    1.15
  -2   7  -3    8.09    1.11
  -5  -2  -3    5.70    1.27
  -5  -2  -3    5.61    1.18
  -5  -2  -3    7.63    1.62
   5   2   3    8.45    1.23
   2  -7   3    6.00    1.07
   2  -7   3    4.73    1.54
  -5  -1  -3    3.42    1.05
  -5  -1  -3    2.00    0.97
   6  -5  -3    3.08    0.81
  -5  -1  -3    2.99    1.19
  -1   6  -3    3.03    0.86
   1  -6   3    2.40    0.87
   1  -6   3    3.89    1.04
   1  -6   3    2.29    1.13
   5   1   3    1.83    0.87
  -5   0  -3   10.97    1.38
   5  -5  -3   11.93    1.07
  -5   0  -3    8.81    1.20
   0   5  -3   12.31    1.22
  -5   0  -3   11.17    1.30
  -5   0  -3   11.76    1.53
   0  -5   3   11.86    1.38
   0  -5   3   13.83    1.34
   0  -5   3   12.99    1.77
   5   0   3   12.62    1.35
   1   4  -3   35.08    2.29
  -5   1  -3   26.68    2.07
   1   4  -3   31.69    2.02
  -5   1  -3   29.57    2.06
   4  -5  -3   32.72    1.75
  -5   1  -3   34.36    2.16
  -1  -4   3   31.89    2.15
  -4   5   3   34.52    1.87
   5  -1   3   31.70    2.16
   5  -1   3   30.83    2.06
  -1  -4   3   32.65    2.00
  -1  -4   3   36.96    2.53
  -5   2  -3   19.26    1.68
   2   3  -3   22.38    1.53
   2   3  -3   19.77    1.57
   3  -5  -3   18.50    1.13
   3  -5  -3   17.91    1.17
   3  -5  -3   17.02    1.72
   2   3  -3   19.24    1.43
  -5   2  -3   19.49    1.68
  -3   5   3   19.32    1.42
  -3   5   3   18.62    2.00
  -2  -3   3   18.42    1.86
   5  -2   3   21.69    1.73
  -2  -3   3   20.04    1.61
   2  -5  -3   18.52    1.81
   2  -5  -3   20.78    1.19
   3   2  -3   20.26    1.60
   3   2  -3   19.68    1.48
   2  -5  -3   19.50    1.70
  -2   5   3   20.32    1.55
   5  -3   3   22.58    1.77
  -3  -2   3   22.03    2.04
  -3  -2   3   21.63    1.56
  -3  -2   3   22.53    1.67
   1  -5  -3   44.55    2.91
   1  -5  -3   44.93    2.15
   4   1  -3   43.65    2.28
   1  -5  -3   45.43    2.75
  -5   4  -3   47.32    2.89
   4   1  -3   48.71    2.45
   4   1  -3   44.55    2.52
  -1   5   3   41.29    1.99
   5  -4   3   48.38    2.60
  -4  -1   3   43.52    2.43
  -4  -1   3   45.54    2.84
   5   0  -3   80.62    3.92
   0  -5  -3   80.90    3.92
   5   0  -3   76.08    3.59
   0  -5  -3   83.28    4.13
   5   0  -3   81.41    3.84
   0  -5  -3   83.79    4.32
   0  -5  -3   79.03    3.59
  -5   0   3   75.26    4.29
  -5   0   3   85.45    3.99
  -5   0   3   87.47    3.71
   0   5   3   82.20    3.68
   5  -5   3   84.43    4.10
  -1  -5  -3    2.78    1.09
  -1  -5  -3    0.71    0.81
   6  -1  -3    0.17    0.53
   6  -1  -3    1.23    0.78
  -1  -5  -3    1.66    0.57
  -1  -5  -3   -0.82    1.10
   1   5   3    1.47    0.61
  -6   1   3    1.22    0.52
   5  -6   3   -0.41    0.49
  -6   1   3    1.97    0.83
   5  -6   3    0.40    0.82
  -6   1   3    1.93    1.17
   7  -2  -3   18.53    1.68
  -2  -5  -3   20.44    2.27
  -2  -5  -3   18.24    1.44
  -2  -5  -3   14.74    1.62
  -2  -5  -3   14.45    1.72
   5  -7   3   17.86    2.04
   2   5   3   17.75    1.52
  -7   2   3   17.72    1.66
  -7   2   3   19.85    1.26
   5  -7   3   15.43    1.63
   8  -3  -3   51.59    3.21
  -3  -5  -3   51.16    3.35
  -3  -5  -3   54.91    3.24
  -3  -5  -3   51.24    3.69
  -8   3   3   54.49    3.25
   3   5   3   54.21    2.93
  -8   3   3   49.84    2.51
   5  -8   3   57.58    3.73
   9  -4  -3   -0.03    1.14
  -4  -5  -3    0.40    1.10
  -4  -5  -3    0.84    1.17
  -4  -5  -3   -0.28    1.53
   5  -9   3    3.06    1.56
   5  -9   3    1.17    1.01
  -9   4   3    1.97    1.34
  -9   4   3   -0.21    0.58
   4   5   3   -0.04    0.93
  -5  -5  -3    1.48    1.35
  -5  -5  -3    1.58    1.74
  10  -5  -3    2.70    1.31
  -5  -5  -3    1.31    1.40
 -10   5   3    4.00    1.52
   5   5   3    3.98    1.22
   5 -10   3    3.51    1.83
  -6  -5  -3    9.67    1.75
  -6  -5  -3    9.52    2.39
  11  -6  -3    7.75    1.69
  -6  -5  -3    7.21    1.91
   5 -11   3    5.40    2.14
 -11   6   3    3.65    1.72
  -6  -4  -3    2.01    1.40
  -6  -4  -3    1.37    1.66
  10  -6  -3    0.88    1.26
  -6  -4  -3   -0.61    1.17
 -10   6   3    1.58    1.45
   4 -10   3    1.43    1.76
   6   4   3    2.97    1.25
  -6  -3  -3   12.90    2.36
  -6  -3  -3   14.77    2.02
   9  -6  -3   12.92    1.67
  -6  -3  -3   14.78    1.87
  -3   9  -3   13.81    1.55
   3  -9   3   12.99    2.24
  -9   6   3   12.01    1.26
   6   3   3   14.49    1.72
  -6  -2  -3    9.92    1.54
  -6  -2  -3    7.59    1.81
  -6  -2  -3   11.04    1.64
   8  -6  -3    8.17    1.34
  -2   8  -3   10.46    1.32
   6   2   3    9.17    1.43
   2  -8   3    9.04    1.87
   7  -6  -3    3.68    0.95
  -1   7  -3    3.35    0.93
  -6  -1  -3    3.68    1.42
  -6  -1  -3    2.45    1.19
  -6  -1  -3    3.56    1.10
   1  -7   3    3.12    1.18
   6   1   3    2.68    1.07
   1  -7   3    1.31    0.71
   1  -7   3    2.64    1.39
  -6   0  -3    8.74    1.56
  -6   0  -3   11.81    1.51
  -6   0  -3   10.76    1.35
   0   6  -3   11.20    1.28
   6  -6  -3   11.79    1.20
   0  -6   3   11.09    1.71
   0  -6   3   11.17    1.47
   6   0   3    9.54    1.26
  -6   1  -3    1.37    1.07
  -6   1  -3    0.17    0.83
   5  -6  -3   -0.20    0.56
  -6   1  -3    0.71    1.01
   1   5  -3    0.06    0.73
  -1  -5   3   -0.13    0.63
  -1  -5   3   -0.01    0.81
   6  -1   3    0.76    0.86
  -1  -5   3    0.94    1.19
  -6   2  -3    0.75    0.92
   4  -6  -3    1.99    0.61
  -6   2  -3    0.36    0.81
   2   4  -3    2.11    0.84
   4  -6  -3    2.63    1.19
   4  -6  -3    2.08    0.56
  -2  -4   3    0.28    1.11
  -4   6   3    0.92    0.73
  -2  -4   3    1.92    0.88
   6  -2   3    0.59    0.77
  -2  -4   3    2.39    0.77
   3  -6  -3   37.50    2.74
  -6   3  -3   43.52    2.57
   3   3  -3   43.14    2.45
   3  -6  -3   39.59    2.02
  -6   3  -3   36.25    2.49
  -3  -3   3   41.43    2.89
   6  -3   3   40.26    2.50
  -3  -3   3   38.06    2.37
   4   2  -3   29.89    2.08
   4   2  -3   29.50    1.85
   2  -6  -3   30.63    2.23
   2  -6  -3   32.95    2.52
   2  -6  -3   30.26    1.66
  -4  -2   3   32.28    2.13
  -4  -2   3   34.92    2.50
   1  -6  -3    8.97    0.87
   5   1  -3    8.67    1.17
   1  -6  -3   10.58    1.69
   1  -6  -3   10.38    1.43
  -5  -1   3   10.77    1.60
   6  -5   3    9.74    1.24
  -1   6   3    9.43    0.85
  -5  -1   3   11.32    1.30
   6   0  -3   27.71    2.14
   0  -6  -3   28.78    2.28
   0  -6  -3   29.74    1.69
   0  -6  -3   28.77    2.55
   6   0  -3   25.45    1.63
  -6   0   3   31.11    2.69
   0   6   3   32.31    1.77
   6  -6   3   33.51    2.17
   6  -6   3   31.50    2.27
  -6   0   3   31.75    1.80
  -6   0   3   28.63    2.12
   7  -1  -3   18.91    1.85
   7  -1  -3   16.86    1.37
  -1  -6  -3   16.32    1.88
  -1  -6  -3   17.48    1.42
  -1  -6  -3   22.47    2.41
  -7   1   3   17.99    2.21
   6  -7   3   15.86    1.74
   6  -7   3   19.02    1.74
   1   6   3   19.16    1.47
  -7   1   3   19.42    1.80
  -7   1   3   16.83    1.35
   8  -2  -3   32.38    2.53
  -2  -6  -3   30.11    2.00
  -2  -6  -3   31.91    2.59
  -2  -6  -3   31.33    3.05
  -8   2   3   31.17    2.52
   2   6   3   30.44    2.04
   6  -8   3   33.60    2.52
   6  -8   3   29.34    2.20
  -8   2   3   28.92    1.77
  -3  -6  -3   11.78    1.63
  -3  -6  -3   10.13    2.17
   9  -3  -3   13.08    1.78
  -3  -6  -3   11.07    1.84
   6  -9   3   11.19    1.68
  -9   3   3   12.62    1.72
   3   6   3   15.55    1.58
   6  -9   3   15.64    2.28
  -9   3   3   14.68    1.17
  -4  -6  -3   18.52    2.33
  10  -4  -3   19.58    2.25
  -4  -6  -3   19.59    2.80
   4   6   3   20.23    2.00
 -10   4   3   18.55    2.24
   6 -10   3   17.13    2.58
   6 -10   3   18.60    2.12
  -5  -6  -3    9.05    2.01
  11  -5  -3    9.16    1.91
  -5  -6  -3   10.46    2.49
   6 -11   3   12.61    1.94
   6 -11   3    7.35    2.30
 -11   5   3   12.81    2.20
  12  -6  -3    2.79    1.68
  -6  -6  -3    6.08    1.92
  -6  -6  -3    6.89    2.58
   6 -12   3    3.41    2.23
   6 -12   3    6.08    1.78
 -12   6   3    3.41    1.87
  13  -7  -3    1.43    1.69
  -7  -6  -3    3.29    1.85
  -7  -6  -3   -0.97    2.20
 -13   7   3   -0.11    1.88
   6 -13   3   -0.75    1.48
   6 -13   3   -0.89    2.23
  12  -7  -3   -1.34    1.42
  -7  -5  -3    1.79    1.38
  -7  -5  -3    1.98    1.67
  -7  -5  -3   -1.28    2.03
   5 -12   3   -1.81    1.91
 -12   7   3   -1.59    1.65
  -7  -4  -3    6.55    2.21
  -7  -4  -3    5.74    1.79
  -7  -4  -3    5.29    1.69
  11  -7  -3    4.40    1.58
 -11   7   3    4.79    1.80
   4 -11   3    4.18    2.04
   7   4   3    8.76    1.63
  -7  -3  -3    3.21    1.46
  -7  -3  -3    1.17    1.44
  -7  -3  -3    1.62    1.91
  10  -7  -3    2.75    1.30
   3 -10   3    3.26    1.87
   7   3   3    2.15    1.31
  -2   9  -3   16.73    1.69
  -7  -2  -3   13.00    1.82
  -7  -2  -3   14.09    2.37
   9  -7  -3   12.82    1.64
  -7  -2  -3   10.29    1.86
   7   2   3   12.04    1.69
   2  -9   3   15.70    2.39
  -1   8  -3   23.27    1.99
   8  -7  -3   22.30    1.96
  -7  -1  -3   22.01    2.32
  -7  -1  -3   22.64    2.12
  -7  -1  -3   22.15    2.59
   1  -8   3   23.01    2.67
   1  -8   3   25.73    2.12
   1  -8   3   20.63    2.25
   7   1   3   19.53    2.00
  -7   0  -3   57.22    3.70
   7  -7  -3   50.93    2.89
   0   7  -3   52.21    3.04
  -7   0  -3   48.79    3.11
  -7   0  -3   48.32    3.30
   7   0   3   51.89    3.31
   0  -7   3   51.09    3.78
   0  -7   3   53.40    3.39
   0  -7   3   56.98    3.19
   6  -7  -3   29.55    1.97
  -7   1  -3   28.91    2.47
  -7   1  -3   27.48    2.57
   1   6  -3   32.81    2.28
  -7   1  -3   30.18    2.24
  -1  -6   3   29.76    2.41
  -1  -6   3   34.64    2.28
  -1  -6   3   33.30    2.97
   7  -1   3   32.53    2.50
   5  -7  -3    1.07    0.61
   2   5  -3    1.22    0.91
   5  -7  -3    2.00    0.70
  -7   2  -3    0.72    1.06
  -7   2  -3    1.58    0.93
   7  -2   3    0.47    0.97
  -2  -5   3    0.88    1.26
  -2  -5   3    0.36    0.94
   4  -7  -3   64.93    3.04
   3   4  -3   62.16    3.42
  -7   3  -3   64.32    3.46
   4  -7  -3   62.62    3.00
  -7   3  -3   62.80    3.61
   4  -7  -3   58.11    3.68
   7  -3   3   64.14    3.49
  -3  -4   3   59.82    3.44
   3  -7  -3   20.77    1.43
  -7   4  -3   24.23    2.12
  -7   4  -3   22.86    1.97
   3  -7  -3   21.76    2.26
   4   3  -3   18.67    1.72
   7  -4   3   17.83    1.73
  -4  -3   3   16.23    2.03
  -4  -3   3   17.33    1.69
   2  -7  -3   47.96    3.40
   2  -7  -3   51.61    3.19
   2  -7  -3   50.07    2.49
   5   2  -3   46.69    2.86
  -5  -2   3   54.24    3.50
  -5  -2   3   50.45    3.01
   7  -5   3   48.34    3.02
   1  -7  -3   22.81    1.51
   1  -7  -3   16.86    2.22
   6   1  -3   22.37    1.65
   6   1  -3   22.26    2.02
   1  -7  -3   20.89    2.15
   7  -6   3   18.43    1.82
  -6  -1   3   20.13    1.85
  -6  -1   3   19.26    2.27
  -1   7   3   21.38    1.32
   0  -7  -3    1.63    0.66
   0  -7  -3    1.70    1.42
   0  -7  -3    1.50    1.16
   7   0  -3    0.98    0.69
   7   0  -3    0.65    1.01
   7  -7   3    0.37    1.01
   0   7   3    0.88    0.63
  -7   0   3    1.62    1.02
  -7   0   3   -0.91    1.26
  -7   0   3    1.40    0.70
  -1  -7  -3   26.33    2.82
  -1  -7  -3   26.69    1.82
   8  -1  -3   24.59    2.22
  -1  -7  -3   22.31    2.41
   1   7   3   26.26    1.88
  -8   1   3   28.40    2.41
   7  -8   3   30.86    2.52
  -8   1   3   24.96    2.79
  -8   1   3   28.31    1.80
  -2  -7  -3    2.82    1.44
   9  -2  -3    5.62    1.42
  -2  -7  -3    1.21    1.69
  -9   2   3    2.97    0.79
  -9   2   3    1.31    1.26
   2   7   3    4.43    1.08
   7  -9   3    2.60    1.26
  -9   2   3    3.47    1.77
  -3  -7  -3    6.21    2.12
  10  -3  -3    0.87    1.39
  -3  -7  -3    2.29    1.46
 -10   3   3    7.77    1.67
   7 -10   3    6.17    1.55
 -10   3   3    3.77    1.88
  11  -4  -3   20.97    2.41
  -4  -7  -3   14.08    2.28
  -4  -7  -3   15.96    2.99
 -11   4   3   18.44    2.36
   7 -11   3   18.17    2.26
  12  -5  -3   12.90    2.17
  -5  -7  -3   18.42    3.11
  -5  -7  -3   15.60    2.57
   7 -12   3   11.86    2.70
 -12   5   3   13.41    2.30
   7 -12   3   12.42    2.12
  -6  -7  -3    2.99    2.48
  -6  -7  -3    0.22    1.74
  13  -6  -3    4.26    1.92
   7 -13   3    2.81    2.49
   7 -13   3    2.32    1.70
 -13   6   3    0.59    1.85
  -8  -5  -3   -2.30    2.21
  -8  -5  -3    2.47    1.86
  13  -8  -3    0.54    1.64
   5 -13   3    5.80    2.57
 -13   8   3    2.77    2.05
  12  -8  -3   14.01    2.15
  -8  -4  -3   14.01    2.16
  -8  -4  -3   18.92    3.25
  -8  -4  -3   18.89    2.67
   4 -12   3   15.89    3.01
 -12   8   3   16.98    2.53
  -8  -3  -3   16.50    2.87
  11  -8  -3   16.75    2.06
  -8  -3  -3   14.29    2.39
  -8  -3  -3   14.78    2.12
   3 -11   3   11.16    2.56
   8   3   3   13.16    2.00
 -11   8   3   18.56    2.50
  -8  -2  -3    4.59    2.03
  10  -8  -3    9.17    1.67
  -8  -2  -3    8.55    1.88
  -8  -2  -3    7.92    1.71
   8   2   3    8.99    1.72
   2 -10   3    9.65    2.37
  -8  -1  -3    4.28    1.56
  -8  -1  -3    4.79    1.87
  -8  -1  -3    4.47    1.44
   9  -8  -3    3.31    1.26
  -1   9  -3    3.60    1.17
   1  -9   3    4.15    1.93
   8   1   3    4.67    1.45
   0   8  -3   20.73    1.97
  -8   0  -3   20.18    2.25
  -8   0  -3   20.50    2.08
  -8   0  -3   17.29    2.44
   8  -8  -3   22.64    2.05
   0  -8   3   17.73    2.45
   0  -8   3   15.77    2.09
   8   0   3   17.93    1.97
  -8   1  -3   57.12    3.87
   1   7  -3   50.40    3.06
  -8   1  -3   49.38    3.13
   7  -8  -3   49.48    2.89
  -8   1  -3   43.96    3.24
  -1  -7   3   49.72    3.31
  -1  -7   3   48.46    3.81
   8  -1   3   46.62    3.27
   6  -8  -3   28.10    1.88
  -8   2  -3   32.53    2.46
  -8   2  -3   31.69    2.57
   2   6  -3   29.91    2.30
   6  -8  -3   33.23    2.08
  -8   2  -3   26.90    2.64
  -2  -6   3   27.76    2.49
  -2  -6   3   29.04    2.97
   8  -2   3   30.42    2.53
   5  -8  -3    4.21    0.81
   5  -8  -3    6.53    1.66
  -8   3  -3    5.10    1.39
   5  -8  -3    6.41    0.94
  -8   3  -3    5.59    1.23
   3   5  -3    5.62    1.21
  -3  -5   3    6.75    1.30
  -3  -5   3    4.85    1.61
   8  -3   3    5.65    1.31
   4  -8  -3   67.84    4.33
   4  -8  -3   73.09    3.50
   4   4  -3   73.98    3.93
   4  -8  -3   75.11    3.49
  -8   4  -3   72.18    3.89
  -8   4  -3   69.83    4.11
  -4  -4   3   63.88    3.65
  -4  -4   3   65.26    4.18
   8  -4   3   68.20    3.84
  -8   5  -3   16.30    2.02
   3  -8  -3   17.89    1.48
   5   3  -3   24.07    2.13
  -8   5  -3   23.46    2.08
   3  -8  -3   22.44    2.50
  -5  -3   3   21.57    2.49
  -5  -3   3   19.57    1.93
   8  -5   3   16.32    1.78
   2  -8  -3   10.26    1.72
   2  -8  -3   12.01    2.03
   6   2  -3    9.22    1.44
   2  -8  -3   10.29    1.08
   8  -6   3    7.84    1.39
  -6  -2   3   11.20    1.56
  -6  -2   3   13.22    2.05
   1  -8  -3   23.96    1.63
   1  -8  -3   18.47    2.18
   7   1  -3   19.99    1.99
   1  -8  -3   22.25    2.68
  -1   8   3   21.84    1.42
   8  -7   3   18.89    2.06
  -7  -1   3   17.20    2.46
  -7  -1   3   22.88    2.11
   0  -8  -3   22.52    2.42
   0  -8  -3   22.06    2.79
   8   0  -3   18.58    1.98
  -8   0   3   17.59    2.03
   8  -8   3   19.85    2.07
  -8   0   3   22.15    2.66
  -1  -8  -3    8.69    1.83
   9  -1  -3   10.36    1.75
  -1  -8  -3    9.96    2.19
  -9   1   3   13.17    1.28
   8  -9   3   10.85    1.77
  -9   1   3    9.88    2.22
  -9   1   3   12.52    1.85
  -2  -8  -3    1.15    1.96
  10  -2  -3    1.55    1.42
  -2  -8  -3    4.13    1.60
 -10   2   3    0.01    1.76
   8 -10   3    2.96    1.47
 -10   2   3    0.51    1.30
  -3  -8  -3    9.87    2.08
  11  -3  -3    7.56    1.83
  -3  -8  -3    9.06    2.47
   8 -11   3    9.09    1.89
 -11   3   3    8.14    1.86
 -11   3   3    4.18    2.19
  -4  -8  -3    8.95    2.14
  12  -4  -3    7.35    1.91
  -4  -8  -3    6.65    2.61
 -12   4   3    4.87    1.91
   8 -12   3    8.37    1.93
 -12   4   3    5.90    2.47
  -5  -8  -3    4.56    2.02
  -5  -8  -3    2.00    2.58
  13  -5  -3    2.50    1.76
 -13   5   3    1.08    2.32
 -13   5   3    2.50    2.04
   8 -13   3    1.38    1.65
  -9  -4  -3    7.66    1.85
  -9  -4  -3   -0.38    1.92
  13  -9  -3    2.42    1.68
  -9  -4  -3    2.91    2.38
 -13   9   3    1.49    2.04
   4 -13   3    6.45    2.64
  -9  -3  -3   15.98    3.04
  12  -9  -3   11.99    1.99
  -9  -3  -3   20.43    2.71
  -9  -3  -3   11.22    2.09
 -12   9   3   13.80    2.52
   3 -12   3   19.11    3.13
  11  -9  -3   10.62    1.82
  -9  -2  -3    6.72    2.07
  -9  -2  -3   10.90    2.53
  -9  -2  -3    9.60    1.92
   2 -11   3   11.63    2.64
   9   2   3    9.29    1.84
  -9  -1  -3   12.74    2.23
  -9  -1  -3   12.85    2.55
  10  -9  -3   11.46    1.82
  -9  -1  -3   12.79    1.93
   9   1   3   13.81    2.04
   1 -10   3   14.62    2.59
   9  -9  -3    5.00    1.30
  -9   0  -3    3.87    1.40
  -9   0  -3    4.31    1.66
  -9   0  -3    7.37    2.12
   0  -9   3    6.17    2.07
   9   0   3    5.98    1.61
   0  -9   3    6.74    1.81
  -9   1  -3   32.63    3.24
  -9   1  -3   35.12    3.07
   8  -9  -3   35.26    2.49
   1   8  -3   33.63    2.61
  -9   1  -3   34.41    2.77
  -1  -8   3   45.40    3.83
  -1  -8   3   36.33    3.12
   9  -1   3   36.28    3.12
   7  -9  -3   17.28    1.64
  -9   2  -3   14.56    2.07
  -9   2  -3   14.64    2.28
   2   7  -3   20.19    2.01
  -9   2  -3   19.06    1.96
  -2  -7   3   19.40    2.21
   9  -2   3   18.53    2.08
  -2  -7   3   17.04    2.64
   3   6  -3    2.18    1.15
  -9   3  -3    4.54    1.24
  -9   3  -3    0.73    1.34
   6  -9  -3    1.36    0.90
  -3  -6   3    0.95    1.55
  -3  -6   3    1.47    1.23
   9  -3   3    1.11    1.19
   5  -9  -3   17.91    1.81
  -9   4  -3   19.83    2.22
   5  -9  -3   17.68    1.52
   5  -9  -3   17.13    2.40
  -9   4  -3   16.12    1.87
   4   5  -3   20.33    2.01
   9  -4   3   13.85    1.86
  -4  -5   3   22.57    2.18
  -4  -5   3   18.12    2.49
   4  -9  -3    0.99    0.75
  -9   5  -3    1.89    1.38
   4  -9  -3    1.15    1.55
   5   4  -3    1.47    1.15
  -9   5  -3    0.84    1.26
  -5  -4   3    1.55    1.13
  -5  -4   3    2.43    1.68
   9  -5   3    1.93    1.34
  -9   6  -3    2.44    1.54
   3  -9  -3    5.14    1.81
  -9   6  -3    3.41    1.38
   6   3  -3    3.06    1.27
  -6  -3   3    3.63    1.31
   9  -6   3    4.75    1.46
  -6  -3   3    5.78    1.77
   2  -9  -3   10.30    1.83
   7   2  -3    9.13    1.63
   2  -9  -3    9.19    2.13
  -7  -2   3    8.06    1.60
   9  -7   3    8.91    1.56
  -7  -2   3    5.78    1.93
   1  -9  -3    2.76    1.73
   1  -9  -3   -0.46    1.22
   8   1  -3    0.86    1.20
  -8  -1   3   -0.41    1.13
   9  -8   3   -0.29    1.24
  -8  -1   3    1.36    1.66
   9   0  -3    0.95    1.26
   0  -9  -3    4.23    1.99
   0  -9  -3    0.59    1.46
  -9   0   3    3.19    1.43
  -9   0   3    2.79    1.84
   9  -9   3    3.89    1.52
  -1  -9  -3    6.68    2.24
  -1  -9  -3    4.67    1.80
  10  -1  -3    7.16    1.78
 -10   1   3    6.39    1.64
   9 -10   3    2.97    1.61
 -10   1   3    7.46    2.26
  -2  -9  -3    9.39    2.48
  -2  -9  -3    7.01    1.97
  11  -2  -3   12.37    2.19
 -11   2   3    4.80    1.79
   9 -11   3    7.26    1.85
 -11   2   3    9.74    2.56
  12  -3  -3    3.22    1.78
  -3  -9  -3    5.36    2.53
  -3  -9  -3    3.95    1.98
 -12   3   3    5.08    1.90
 -12   3   3    2.16    2.33
   9 -12   3    5.43    1.76
  13  -4  -3    0.16    1.69
  -4  -9  -3   -0.61    1.73
  -4  -9  -3   -2.19    2.22
 -13   4   3   -0.47    1.80
 -13   4   3   -0.75    2.17
   9 -13   3   -2.13    1.56
 -10  -2  -3    1.95    1.86
 -10  -2  -3    4.20    1.81
  12 -10  -3    3.97    1.74
 -10  -2  -3    2.18    2.29
  10   2   3    5.13    1.86
   2 -12   3    4.66    2.54
 -10  -1  -3    5.50    2.56
 -10  -1  -3    4.91    2.02
  11 -10  -3    4.50    1.50
 -10  -1  -3    5.23    1.74
   1 -11   3    7.25    2.50
  10   1   3    6.65    1.75
 -10   0  -3   -3.91    1.39
 -10   0  -3    1.42    1.39
  10 -10  -3   -0.51    1.18
 -10   0  -3   -2.22    1.70
   0 -10   3    0.11    1.57
  10   0   3    1.91    1.51
   0 -10   3   -2.15    1.95
 -10   1  -3    8.08    1.57
 -10   1  -3    7.62    1.93
   9 -10  -3    9.64    1.50
 -10   1  -3    8.72    2.20
  -1  -9   3    8.40    2.29
  10  -1   3    7.54    1.83
  -1  -9   3    8.09    1.91
   8 -10  -3    3.26    1.16
 -10   2  -3   -1.87    1.59
   2   8  -3    2.63    1.26
 -10   2  -3    3.38    1.40
 -10   2  -3    0.28    1.39
  -2  -8   3    3.70    1.54
  10  -2   3    2.56    1.46
  -2  -8   3    5.57    2.11
 -10   3  -3    8.58    2.07
 -10   3  -3   10.37    1.67
   7 -10  -3    8.67    1.34
 -10   3  -3   11.88    2.08
   3   7  -3   10.91    1.67
  10  -3   3    6.68    1.62
  -3  -7   3    9.18    2.21
  -3  -7   3    6.55    1.76
   6 -10  -3    3.01    1.00
 -10   4  -3    3.54    1.66
   4   6  -3    6.36    1.46
 -10   4  -3    1.06    1.20
  10  -4   3    2.13    1.41
  -4  -6   3    3.31    1.85
  -4  -6   3    2.64    1.35
   5 -10  -3    2.70    0.97
 -10   5  -3    0.98    1.21
   5 -10  -3    0.39    1.76
 -10   5  -3    1.14    1.56
   5   5  -3    2.16    1.32
  10  -5   3    0.67    1.37
  -5  -5   3    3.20    1.38
  -5  -5   3    3.59    1.79
   4 -10  -3   -0.24    1.65
 -10   6  -3    2.99    1.63
   6   4  -3    3.00    1.27
 -10   6  -3   -0.19    1.29
  -6  -4   3    0.91    1.73
  -6  -4   3   -0.05    1.16
  10  -6   3    0.58    1.31
 -10   7  -3   14.18    2.21
 -10   7  -3   11.11    1.95
   3 -10  -3   10.34    2.34
   7   3  -3   13.38    1.98
  10  -7   3    8.01    1.74
  -7  -3   3   10.47    2.30
  -7  -3   3    9.69    1.75
   2 -10  -3    6.46    1.98
   8   2  -3   10.21    1.85
   2 -10  -3    7.34    2.24
  -8  -2   3   11.91    2.45
  10  -8   3    8.38    1.81
  -8  -2   3    7.41    1.75
   1 -10  -3    0.56    1.83
   9   1  -3    0.02    1.37
   1 -10  -3    2.23    1.64
  -9  -1   3   -0.07    1.37
  10  -9   3    0.78    1.45
  -9  -1   3    1.91    1.94
   0 -10  -3    4.31    2.25
  10   0  -3    0.31    1.53
   0 -10  -3    3.98    1.74
 -10   0   3    0.97    1.50
  10 -10   3    3.50    1.70
 -10   0   3    1.80    2.07
  -1 -10  -3    8.18    2.58
  11  -1  -3    7.76    1.98
  -1 -10  -3   12.59    2.36
 -11   1   3    7.16    1.99
  10 -11   3   12.49    2.19
 -11   1   3   10.60    2.72
  12  -2  -3    1.99    1.83
  -2 -10  -3    2.02    1.87
  -2 -10  -3    2.07    2.46
 -12   2   3    2.22    2.22
 -12   2   3    2.77    1.82
  10 -12   3   -0.64    1.69
 -11  -1  -3    4.66    3.08
 -11  -1  -3    5.54    2.72
 -11  -1  -3    1.38    1.84
  12 -11  -3    4.21    1.68
  11   1   3    3.19    1.86
   1 -12   3    5.55    2.55
 -11   0  -3    8.00    2.64
 -11   0  -3    8.36    1.96
  11 -11  -3    7.07    1.72
 -11   0  -3    9.89    2.33
   0 -11   3    5.82    2.52
  11   0   3    9.52    2.01
   0 -11   3   12.52    2.40
 -11   1  -3    3.74    2.35
 -11   1  -3    7.40    1.72
  10 -11  -3    5.78    1.56
 -11   1  -3    6.43    2.10
  -1 -10   3    7.56    2.13
  -1 -10   3   11.50    2.73
  11  -1   3   11.21    2.12
 -11   2  -3    1.62    1.95
 -11   2  -3   -0.14    1.59
   9 -11  -3    0.98    1.17
 -11   2  -3    3.16    1.51
  -2  -9   3    2.24    2.09
  -2  -9   3    2.18    1.69
  11  -2   3    0.46    1.57
 -11   3  -3    4.51    1.73
   8 -11  -3    3.63    1.20
 -11   3  -3    0.65    2.02
 -11   3  -3    3.31    1.38
  11  -3   3    1.90    1.51
  -3  -8   3    2.21    1.57
  -3  -8   3    3.27    2.01
 -11   4  -3    8.92    2.00
   4   7  -3   14.64    1.96
 -11   4  -3   11.97    1.78
   7 -11  -3   13.49    1.55
  -4  -7   3   13.70    2.62
  11  -4   3   14.68    2.14
  -4  -7   3   12.38    2.15
   6 -11  -3   16.68    1.59
   6 -11  -3   14.27    2.57
 -11   5  -3   14.25    1.85
 -11   5  -3   10.70    2.32
   5   6  -3   13.15    1.99
  -5  -6   3   18.62    2.90
  11  -5   3   14.99    2.14
  -5  -6   3   18.12    2.28
   6   5  -3   10.02    1.85
 -11   6  -3   11.35    2.17
   5 -11  -3    6.29    2.23
   5 -11  -3   11.54    1.40
 -11   6  -3    9.10    1.65
  -6  -5   3    9.31    1.84
  -6  -5   3    8.33    2.29
  11  -6   3   13.43    2.08
 -11   7  -3    3.96    1.91
 -11   7  -3    9.12    1.75
   4 -11  -3    5.46    2.36
   7   4  -3    6.77    1.63
  11  -7   3    6.82    1.73
  -7  -4   3    5.09    1.69
  -7  -4   3    4.47    2.18
   8   3  -3   27.24    2.68
 -11   8  -3   24.53    2.63
 -11   8  -3   22.27    2.87
   3 -11  -3   17.40    2.97
  11  -8   3   21.28    2.38
  -8  -3   3   22.37    2.53
  -8  -3   3   20.35    3.10
   2 -11  -3   18.95    3.08
   9   2  -3   24.47    2.66
  -9  -2   3   26.91    3.55
  11  -9   3   23.13    2.59
  -9  -2   3   19.90    2.56
   1 -11  -3    2.88    1.85
   1 -11  -3    4.71    2.29
  10   1  -3    3.87    1.66
  11 -10   3    1.21    1.64
 -10  -1   3   -1.00    1.50
 -10  -1   3    0.86    2.09
   0 -11  -3   10.03    2.37
   0 -11  -3    7.94    2.66
  11   0  -3    5.57    1.91
  11 -11   3    6.39    1.97
 -11   0   3    8.66    2.13
 -11   0   3    7.63    2.62
  -1 -11  -3   15.98    3.23
  12  -1  -3    8.22    2.17
  -1 -11  -3    8.90    2.36
 -12   1   3    6.62    2.74
 -12   1   3    9.74    2.36
  11 -12   3   12.45    2.33
  11 -12  -3   13.01    1.94
 -12   1  -3    6.64    2.77
 -12   1  -3    9.00    2.49
  -1 -11   3   14.14    3.22
  12  -1   3   12.69    2.32
  -1 -11   3   12.23    2.45
 -12   2  -3    6.81    2.12
  10 -12  -3    5.66    1.58
 -12   2  -3    4.35    2.45
  12  -2   3    9.33    2.11
  -2 -10   3    3.77    1.95
  -2 -10   3    8.47    2.76
 -12   3  -3    0.88    1.82
   9 -12  -3    0.56    1.14
 -12   3  -3    0.32    2.04
  12  -3   3    3.37    1.88
  -3  -9   3    1.73    1.65
  -3  -9   3    3.19    2.35
   8 -12  -3   11.76    1.58
 -12   4  -3   16.88    2.83
 -12   4  -3   11.72    2.45
  -4  -8   3   13.51    2.34
  -4  -8   3    9.73    2.83
  12  -4   3   10.82    2.02
 -12   5  -3   20.94    2.80
   7 -12  -3   19.03    1.84
  -5  -7   3   19.88    2.59
  -5  -7   3   23.25    3.32
  12  -5   3   17.19    2.49
   6 -12  -3    4.32    2.38
 -12   6  -3    6.03    2.09
   6   6  -3    3.85    1.58
   6 -12  -3    3.76    1.13
  -6  -6   3    2.62    2.16
  12  -6   3    6.65    1.88
  -6  -6   3    5.66    1.78
   7   5  -3    3.13    1.59
   5 -12  -3    0.01    2.03
   5 -12  -3    3.71    1.19
 -12   7  -3    5.16    2.07
  -7  -5   3    6.80    1.83
  12  -7   3    2.83    1.76
  -7  -5   3    3.73    2.29
   8   4  -3   12.45    2.09
 -12   8  -3    6.90    2.16
   4 -12  -3    8.71    2.52
  -8  -4   3    7.66    2.67
  -8  -4   3   12.86    2.11
  12  -8   3    6.76    1.91
 -12   9  -3    7.27    2.46
   9   3  -3   13.00    2.29
   3 -12  -3   16.02    2.90
  -9  -3   3   14.17    2.32
  12  -9   3   12.46    2.16
  -9  -3   3    9.44    2.70
  10   2  -3    3.52    1.72
   2 -12  -3    0.23    2.16
 -10  -2   3    3.36    1.76
  12 -10   3    1.94    1.72
 -10  -2   3   -1.34    2.16
   1 -12  -3    2.83    2.45
   1 -12  -3   -1.78    1.94
  11   1  -3   -1.76    1.58
 -11  -1   3    1.40    1.80
  12 -11   3    1.20    1.84
 -11  -1   3    1.42    2.42
 -13   4  -3   -0.23    1.92
 -13   4  -3    1.18    2.26
   9 -13  -3   -1.56    1.06
  -4  -9   3   -0.96    1.51
  13  -4   3   -1.11    1.73
  -4  -9   3   -0.02    2.40
   8 -13  -3    0.86    1.16
 -13   5  -3    1.40    2.13
 -13   5  -3   -2.27    2.29
  -5  -8   3    0.57    2.34
  13  -5   3    2.23    1.71
  -5  -8   3   -0.57    1.65
   7 -13  -3    3.64    1.23
 -13   6  -3   -1.14    1.98
  13  -6   3    4.36    2.02
  -6  -7   3    1.97    1.77
  -6  -7   3    5.66    2.58
   6 -13  -3   -1.72    2.20
 -13   7  -3    0.10    2.07
   6 -13  -3    4.59    1.22
  -7  -6   3    4.44    1.90
  -7  -6   3    2.92    2.47
  13  -7   3    2.19    1.96
   5 -13  -3    0.75    1.06
   5 -13  -3    0.50    2.29
 -13   8  -3    0.23    2.12
  -8  -5   3    2.85    2.37
  -8  -5   3   -2.59    1.58
  13  -8   3   -0.48    1.70
   4 -13  -3    2.60    2.42
 -13   9  -3    3.61    2.24
   9   4  -3    0.84    1.75
  -9  -4   3    3.75    1.87
  13  -9   3    2.34    1.87
  -9  -4   3    2.61    2.42
   0   0  -4   -0.63    0.55
   0   0  -4   -0.04    0.40
   0   0  -4    0.04    0.31
   0   0   4    0.16    0.28
   0   0   4   -0.20    0.27
   0   0   4   -0.34    0.39
   1  -1  -4  306.86   12.23
   0   1  -4  322.78   12.30
  -1   0  -4  284.40   12.13
   1  -1  -4  278.63   12.20
   1  -1  -4  293.18   12.16
   0   1  -4  293.33   12.34
  -1   0  -4  310.42   12.29
  -1   0  -4  314.34   12.40
   1   0   4  278.58   12.42
   1   0   4  299.68   12.34
   0  -1   4  310.29   12.36
  -1   1   4  321.90   12.24
  -1   1   4  299.12   12.26
   1   0   4  300.21   12.37
   0  -1   4  293.12   12.40
  -1   1   4  320.30   12.32
   1   0   4  293.73   12.34
   0  -1  -4   70.45    3.22
  -1   1  -4   77.20    3.41
  -1   1  -4   79.54    3.23
   0  -1  -4   76.63    3.31
   0  -1  -4   84.28    3.41
   0  -1  -4   68.10    3.25
   1   0  -4   76.63    3.36
   0   1   4   76.49    3.24
   1  -1   4   79.14    3.25
   0   1   4   71.63    3.24
   1  -1   4   77.31    3.42
   0   1   4   70.95    3.29
   0   1   4   81.51    3.41
  -1   0   4   77.19    3.39
   0   1   4   79.35    3.32
  -1  -1  -4   20.27    1.36
  -1  -1  -4   22.29    1.50
  -1  -1  -4   22.79    1.41
   2  -1  -4   21.40    1.06
  -1   2  -4   21.43    1.45
  -1   2  -4   22.72    1.43
   2  -1  -4   20.30    1.25
  -1  -1  -4   23.73    1.25
   1   1   4   20.17    1.28
  -2   1   4   22.65    1.22
   1  -2   4   24.09    1.46
   1   1   4   23.64    1.22
   1  -2   4   24.33    1.47
   1   1   4   16.01    1.30
   1   1   4   23.76    1.37
   3  -2  -4   16.52    1.15
  -1   3  -4   16.62    1.29
  -1   3  -4   19.95    1.49
  -2  -1  -4   16.44    1.47
  -2  -1  -4   16.67    1.43
  -2  -1  -4   16.95    1.19
  -1   3  -4   16.93    1.36
  -2  -1  -4   17.96    1.42
  -3   2   4   18.66    1.11
   1  -3   4   20.82    1.61
   1  -3   4   18.29    1.36
  -3   2   4   17.97    0.87
   2   1   4   18.69    1.25
   2   1   4   17.88    1.37
   2   1   4   14.85    1.27
   2  -2  -4    7.09    0.64
  -2   0  -4    6.59    0.85
  -2   0  -4    6.02    0.93
  -2   0  -4    6.10    0.73
   0   2  -4    7.26    0.75
  -2   0  -4    5.73    0.74
   2  -2  -4    7.35    0.59
   0   2  -4    6.39    0.83
   0   2  -4    8.95    0.98
  -2   2   4    8.01    0.63
   2   0   4    7.34    0.79
  -2   2   4    6.37    0.59
   0  -2   4    7.96    0.86
   2   0   4    7.04    0.83
  -2   2   4    6.79    0.71
   0  -2   4    8.29    0.98
   2   0   4    6.89    0.89
  -2   1  -4   42.54    2.19
   1   1  -4   42.38    2.18
   1   1  -4   45.45    1.98
   1   1  -4   48.64    2.30
   1  -2  -4   36.18    1.82
  -2   1  -4   43.44    2.19
   1  -2  -4   42.59    2.20
   1  -2  -4   47.37    2.08
  -2   1  -4   43.61    2.32
   1  -2  -4   40.84    2.11
  -1  -1   4   45.59    2.35
  -1   2   4   43.20    2.25
  -1   2   4   47.41    2.19
  -1  -1   4   47.47    2.10
  -1   2   4   45.78    2.20
   2  -1   4   43.36    2.30
   2  -1   4   45.55    2.23
  -1  -1   4   47.18    2.27
   0  -2  -4  267.23   10.86
   2   0  -4  271.50   11.08
   2   0  -4  264.14   10.89
   0  -2  -4  247.31   11.10
  -2   2  -4  270.71   11.05
   0  -2  -4  283.96   11.10
   0  -2  -4  268.93   11.09
  -2   0   4  273.21   10.97
  -2   0   4  263.30   10.68
   0   2   4  269.25   10.87
   0   2   4  257.33   10.60
   2  -2   4  266.03   10.90
   2  -2   4  264.75   10.84
   0   2   4  263.57   10.91
   0   2   4  246.93   10.61
   0   2   4  259.31   10.86
  -1  -2  -4   36.39    2.21
  -2   3  -4   43.11    2.17
  -1  -2  -4   37.48    2.19
   3  -1  -4   36.84    2.01
  -1  -2  -4   36.80    2.16
  -2   3  -4   43.32    2.16
  -1  -2  -4   41.23    1.88
   1   2   4   38.19    1.87
  -3   1   4   42.87    1.95
   1   2   4   37.31    2.14
   2  -3   4   40.41    2.15
   1   2   4   39.58    2.14
  -3   1   4   43.08    2.02
   2  -3   4   38.85    2.19
   4  -2  -4  103.37    4.45
  -2  -2  -4   96.17    4.58
  -2  -2  -4   89.74    4.62
  -2  -2  -4  102.94    4.66
  -2  -2  -4   99.98    4.37
  -2   4  -4  106.51    4.59
   2   2   4  100.25    4.63
   2  -4   4  106.48    4.83
   2   2   4  102.84    4.46
   2   2   4   94.26    4.67
   2   2   4   99.46    4.67
   2  -4   4  104.70    4.66
  -4   2   4  106.41    4.51
  -3  -2  -4   97.20    4.65
  -2   5  -4  100.16    4.52
  -3  -2  -4   99.13    4.60
  -3  -2  -4   91.37    4.73
  -3  -2  -4   90.25    4.33
   5  -3  -4   99.46    4.39
   2  -5   4  100.20    4.98
   3   2   4  103.20    4.56
   3   2   4   90.98    4.76
   2  -5   4  108.06    4.71
  -3  -1  -4   65.80    3.46
   4  -3  -4   68.55    3.14
  -3  -1  -4   69.97    3.44
  -1   4  -4   70.87    3.35
  -3  -1  -4   67.51    3.22
  -3  -1  -4   67.75    3.38
   1  -4   4   68.74    3.27
   3   1   4   62.98    3.23
   3   1   4   69.42    3.18
   3   1   4   63.06    3.26
  -4   3   4   65.44    3.02
   3   1   4   59.32    3.22
   1  -4   4   68.86    3.51
  -4   3   4   70.75    2.83
  -3   0  -4   23.18    1.63
  -3   0  -4   22.92    1.48
   0   3  -4   24.02    1.50
  -3   0  -4   21.88    1.69
   3  -3  -4   22.97    1.26
  -3   0  -4   24.31    1.63
   0   3  -4   19.79    1.55
   0   3  -4   24.22    1.72
   3   0   4   22.95    1.65
  -3   3   4   23.03    1.28
  -3   3   4   25.42    1.31
   0  -3   4   25.80    1.62
  -3   3   4   22.72    1.70
   0  -3   4   26.64    1.97
   3   0   4   26.71    1.62
   0  -3   4   27.55    1.67
  -3   1  -4   58.42    2.98
   2  -3  -4   59.62    2.76
  -3   1  -4   61.54    3.08
   1   2  -4   58.34    2.95
   1   2  -4   64.63    2.84
   2  -3  -4   60.24    2.54
  -3   1  -4   57.48    2.90
   1   2  -4   64.96    3.08
  -1  -2   4   65.58    3.10
  -2   3   4   61.58    3.03
  -1  -2   4   66.24    3.02
   3  -1   4   67.35    3.16
  -2   3   4   65.92    2.93
  -1  -2   4   69.39    3.34
  -2   3   4   60.73    3.16
   1  -3  -4   52.92    2.80
   1  -3  -4   57.21    2.73
   1  -3  -4   57.51    2.93
   2   1  -4   58.99    2.92
  -3   2  -4   54.99    2.79
   2   1  -4   57.36    2.79
   2   1  -4   57.33    2.60
  -1   3   4   65.52    2.87
  -2  -1   4   62.99    2.92
  -1   3   4   54.76    2.96
   3  -2   4   60.16    2.99
  -1   3   4   60.99    2.91
  -2  -1   4   61.48    3.11
  -2  -1   4   59.36    2.78
   0  -3  -4   78.70    3.79
   3   0  -4   79.38    3.66
   0  -3  -4   78.77    3.35
   3   0  -4   81.21    3.38
  -3   3  -4   83.94    3.73
   0  -3  -4   79.18    3.71
   0  -3  -4   75.77    3.82
   3   0  -4   77.97    3.51
   0   3   4   71.13    3.18
   3  -3   4   78.58    3.58
   0   3   4   72.09    3.51
   3  -3   4   75.04    3.67
  -3   0   4   79.97    3.78
  -3   0   4   79.07    3.39
   0   3   4   78.84    3.61
   0   3   4   77.71    3.67
  -1  -3  -4   36.29    2.16
   4  -1  -4   32.62    1.93
  -1  -3  -4   35.76    2.30
   4  -1  -4   30.69    1.47
  -1  -3  -4   34.44    2.04
  -1  -3  -4   33.68    1.68
   1   3   4   35.78    2.23
   1   3   4   31.65    2.05
   3  -4   4   36.74    2.05
   1   3   4   35.99    1.76
  -4   1   4   35.16    1.89
   3  -4   4   34.66    2.16
  -2  -3  -4   19.69    1.74
   5  -2  -4   23.24    1.65
  -2  -3  -4   22.88    1.45
  -3   5  -4   24.44    1.68
  -3   5  -4   21.57    1.98
  -2  -3  -4   23.63    1.96
  -2  -3  -4   20.90    1.80
   3  -5   4   25.60    2.07
   2   3   4   22.90    1.44
  -5   2   4   19.29    1.52
   2   3   4   20.18    1.77
   3  -5   4   24.06    1.66
  -3  -3  -4    9.31    1.03
  -3  -3  -4   13.00    1.65
  -3   6  -4   14.67    1.33
   6  -3  -4   10.87    1.17
  -3  -3  -4   11.25    1.39
  -3  -3  -4   11.10    1.43
  -6   3   4   12.00    1.28
   3   3   4   13.20    1.18
   3  -6   4   14.74    1.76
  -3   7  -4   10.27    1.26
  -4  -3  -4    9.20    1.65
  -4  -3  -4    6.68    1.30
   7  -4  -4    6.88    1.14
  -4  -3  -4    8.63    1.48
  -7   4   4    7.02    1.27
   3  -7   4    2.41    0.84
   4   3   4    7.34    1.09
  -7   4   4    7.25    0.59
   3  -7   4    8.11    1.55
  -4  -2  -4   40.44    2.65
  -4  -2  -4   46.42    2.67
  -2   6  -4   40.88    2.45
  -4  -2  -4   42.46    2.89
   6  -4  -4   43.52    2.43
   4   2   4   40.44    2.42
   2  -6   4   44.99    2.94
  -4  -1  -4    7.70    1.30
   5  -4  -4   10.73    1.01
  -4  -1  -4    9.44    1.21
  -1   5  -4   11.36    1.20
  -4  -1  -4    8.35    1.17
  -5   4   4   10.50    0.84
   1  -5   4   10.75    1.19
   1  -5   4   11.15    1.54
   4   1   4   10.86    1.13
  -4   0  -4   18.49    1.64
   0   4  -4   20.76    1.79
   0   4  -4   19.11    1.54
  -4   0  -4   17.94    1.58
   0   4  -4   19.99    1.52
  -4   0  -4   20.11    1.79
   4  -4  -4   18.43    1.27
   0  -4   4   17.60    1.79
   4   0   4   16.47    1.52
   4   0   4   18.63    1.59
   0  -4   4   19.58    1.53
   0  -4   4   19.52    1.56
  -4   4   4   19.34    1.17
  -4   4   4   17.60    1.14
  -4   1  -4   17.05    1.50
   1   3  -4   19.76    1.43
   3  -4  -4   19.01    1.08
   1   3  -4   20.48    1.55
   1   3  -4   18.31    1.70
  -4   1  -4   20.33    1.70
  -3   4   4   21.52    1.67
   4  -1   4   18.80    1.51
  -1  -3   4   20.68    1.45
  -3   4   4   19.50    1.46
  -3   4   4   20.01    1.30
  -1  -3   4   21.36    1.85
   4  -1   4   22.58    1.63
  -1  -3   4   19.70    1.51
   2   2  -4   59.73    2.92
   2   2  -4   61.85    2.76
   2   2  -4   59.71    3.07
   2  -4  -4   55.03    2.73
   2  -4  -4   55.86    2.92
   2  -4  -4   54.61    2.40
   2  -4  -4   52.98    2.40
   2  -4  -4   53.76    3.03
  -4   2  -4   60.26    2.99
  -4   2  -4   62.14    3.08
  -2  -2   4   64.79    2.94
  -2   4   4   59.39    3.15
  -2   4   4   59.17    2.86
   4  -2   4   63.31    3.10
  -2  -2   4   58.63    3.24
  -2   4   4   55.86    2.95
   1  -4  -4   37.16    1.75
  -4   3  -4   41.66    2.28
   3   1  -4   41.58    2.00
   1  -4  -4   38.82    2.23
   3   1  -4   40.63    2.06
   1  -4  -4   41.07    2.38
   3   1  -4   41.48    2.31
   1  -4  -4   41.89    2.51
  -1   4   4   42.21    2.37
  -1   4   4   42.21    2.25
  -3  -1   4   44.28    2.19
  -3  -1   4   44.01    2.28
   4  -3   4   42.93    2.44
  -3  -1   4   39.72    2.56
  -1   4   4   37.94    2.44
   4   0  -4   17.70    1.44
   0  -4  -4   19.44    1.51
   0  -4  -4   16.52    1.02
   4   0  -4   16.02    1.07
   0  -4  -4   16.62    1.72
   0  -4  -4   15.91    1.49
   4   0  -4   18.28    1.29
  -4   0   4   21.00    1.39
   0   4   4   18.03    1.67
  -4   0   4   18.25    1.75
   0   4   4   17.36    1.01
   4  -4   4   17.35    1.51
   5  -1  -4    7.83    0.66
  -1  -4  -4    8.46    1.27
  -1  -4  -4    8.19    0.79
  -1  -4  -4    8.99    1.42
   5  -1  -4    8.37    1.01
  -1  -4  -4    9.59    1.19
   4  -5   4    7.54    1.23
  -5   1   4    6.41    0.97
   4  -5   4    8.25    1.14
   1   4   4    7.96    0.78
  -2  -4  -4   87.60    4.01
  -2  -4  -4   89.57    4.45
  -2  -4  -4   87.05    4.66
   6  -2  -4   90.85    4.27
  -2  -4  -4   84.95    4.31
  -6   2   4   91.59    4.37
   4  -6   4   92.93    4.69
   2   4   4   91.77    4.17
  -3  -4  -4    9.31    1.41
  -3  -4  -4    6.75    1.38
   7  -3  -4   10.10    1.27
  -3  -4  -4    6.65    1.52
  -3  -4  -4    8.61    1.01
   4  -7   4    7.28    1.12
   3   4   4    6.69    0.99
  -7   3   4    9.37    1.26
   4  -7   4    7.24    1.55
  -4  -4  -4    3.57    0.88
  -4  -4  -4    3.73    1.58
   8  -4  -4    4.45    1.17
  -4  -4  -4    3.69    1.29
  -4  -4  -4    2.65    1.21
   4  -8   4    2.83    0.96
   4   4   4    3.51    1.01
  -8   4   4    2.24    1.16
   4  -8   4    3.93    1.58
  -5  -4  -4   25.69    2.91
   9  -5  -4   28.90    2.49
  -5  -4  -4   33.20    2.68
  -5  -4  -4   27.06    2.62
  -9   5   4   23.37    2.26
   5   4   4   26.17    2.21
   4  -9   4   29.28    3.26
  -9   5   4   20.93    1.33
   4  -9   4   27.68    2.83
  -5  -3  -4    0.35    1.07
   8  -5  -4   -0.86    0.86
  -3   8  -4   -1.00    0.78
  -5  -3  -4   -0.27    1.33
  -5  -3  -4    0.17    1.11
   3  -8   4   -0.32    1.30
   5   3   4   -0.42    0.88
  -8   5   4    0.59    0.53
   3  -8   4   -0.33    0.82
  -5  -2  -4   22.39    2.20
   7  -5  -4   20.18    1.77
  -5  -2  -4   14.56    1.79
  -2   7  -4   19.53    1.76
  -5  -2  -4   19.29    1.84
   2  -7   4   24.36    1.95
   2  -7   4   19.70    2.30
   5   2   4   22.38    1.85
  -5  -1  -4    8.47    1.31
  -5  -1  -4    8.90    1.29
  -5  -1  -4    7.45    1.27
  -5  -1  -4    7.71    1.48
  -1   6  -4    9.13    1.20
   6  -5  -4    9.88    1.10
   1  -6   4    9.37    1.62
   5   1   4    8.11    1.14
  -5   0  -4   11.35    1.50
   5  -5  -4    9.98    0.98
   0   5  -4    7.78    1.06
  -5   0  -4    7.25    0.95
  -5   0  -4    9.91    1.29
  -5   0  -4    7.02    1.15
   5   0   4    8.36    1.12
   0  -5   4   11.53    1.67
   0  -5   4   10.45    1.30
  -5   5   4    9.44    0.88
   4  -5  -4   11.34    0.92
   1   4  -4   11.16    1.23
  -5   1  -4   11.14    1.30
  -5   1  -4   10.77    1.33
   1   4  -4   12.60    1.29
  -5   1  -4   10.93    1.36
  -5   1  -4    9.94    1.34
  -1  -4   4   12.47    1.63
  -4   5   4   11.86    1.06
  -1  -4   4    9.57    1.16
  -1  -4   4   12.79    1.34
   5  -1   4   13.83    1.39
  -5   2  -4    7.10    1.16
   2   3  -4    5.85    0.86
   3  -5  -4    6.22    0.58
   3  -5  -4    3.47    1.15
   2   3  -4    5.49    0.84
   2   3  -4    5.50    0.91
  -5   2  -4    3.70    1.02
   3  -5  -4    5.18    0.56
  -2  -3   4    7.20    1.06
   5  -2   4    4.91    0.93
  -3   5   4    5.74    0.88
  -3   5   4    6.19    1.14
  -2  -3   4    5.72    1.22
  -2  -3   4    6.86    0.98
   2  -5  -4    0.23    0.85
   2  -5  -4    0.97    0.98
   3   2  -4   -0.46    0.35
   2  -5  -4    0.36    0.35
   3   2  -4   -0.52    0.66
  -5   3  -4    1.15    0.93
   3   2  -4   -0.68    0.43
  -3  -2   4   -0.20    0.68
  -2   5   4   -0.79    0.55
  -3  -2   4    1.22    0.99
   5  -3   4    1.44    0.83
  -3  -2   4    0.15    0.68
   1  -5  -4  105.61    4.94
   4   1  -4  102.14    4.48
   1  -5  -4   97.31    4.31
   1  -5  -4  102.38    5.10
   4   1  -4   98.35    4.72
  -5   4  -4  112.40    4.93
   1  -5  -4   99.30    4.71
  -4  -1   4  101.57    4.67
  -4  -1   4  103.41    5.11
   5  -4   4  103.49    4.87
   5   0  -4   64.33    2.97
   0  -5  -4   68.20    3.58
   5   0  -4   64.70    3.32
   0  -5  -4   65.03    2.94
   5   0  -4   67.88    3.22
   0  -5  -4   64.23    3.34
   0  -5  -4   59.92    3.65
   5  -5   4   68.53    3.61
   5  -5   4   73.27    3.56
  -5   0   4   68.85    3.42
   0   5   4   68.89    3.09
  -5   0   4   69.21    3.91
   6  -1  -4    3.33    0.96
  -1  -5  -4    2.35    1.06
  -1  -5  -4    3.43    0.64
  -1  -5  -4    2.91    1.27
   6  -1  -4    3.38    0.59
  -1  -5  -4    3.29    0.98
  -6   1   4    3.76    0.91
   5  -6   4    4.29    0.93
   1   5   4    3.17    0.66
   5  -6   4    3.80    1.08
  -6   1   4    3.24    1.18
  -2  -5  -4    7.83    1.43
  -2  -5  -4    6.80    1.30
   7  -2  -4    9.13    1.29
  -2  -5  -4    6.95    0.91
  -2  -5  -4    8.68    1.67
   5  -7   4    9.99    1.25
   5  -7   4    8.65    1.55
   5  -7   4    5.51    1.20
   2   5   4    8.79    1.01
  -7   2   4    7.93    1.24
   8  -3  -4   24.87    2.24
  -3  -5  -4   23.73    1.78
  -3  -5  -4   24.13    2.18
  -3  -5  -4   24.93    2.29
  -3  -5  -4   22.89    2.59
   3   5   4   26.70    1.88
   5  -8   4   24.18    2.52
  -8   3   4   24.34    2.14
   5  -8   4   25.70    2.05
  -8   3   4   23.62    1.29
  -4  -5  -4   36.03    2.88
  -4  -5  -4   37.86    3.39
   9  -4  -4   36.03    2.85
  -4  -5  -4   40.30    3.05
   5  -9   4   35.02    3.19
  -9   4   4   36.62    2.88
   4   5   4   36.73    2.50
  -5  -5  -4    6.20    2.04
  -5  -5  -4    3.21    1.46
  -5  -5  -4    6.75    1.67
  10  -5  -4    6.75    1.54
   5 -10   4    8.18    2.05
 -10   5   4    5.85    1.65
   5   5   4    8.21    1.42
  11  -6  -4   10.11    1.83
  -6  -5  -4   10.61    1.89
  -6  -5  -4    8.94    1.95
  -6  -5  -4    4.78    2.22
 -11   6   4    7.19    1.84
   5 -11   4    9.27    2.32
  -6  -4  -4    1.37    1.37
  10  -6  -4    2.76    1.29
  -6  -4  -4    1.34    1.70
  -6  -4  -4    2.89    1.55
   4 -10   4    2.80    1.78
   6   4   4    1.42    1.19
 -10   6   4    4.38    1.56
  -6  -3  -4   10.29    1.86
   9  -6  -4   10.05    1.49
  -3   9  -4    9.37    1.42
  -6  -3  -4    7.57    2.14
  -6  -3  -4    8.49    1.66
   6   3   4    9.86    1.51
   3  -9   4    9.79    2.14
  -9   6   4    8.77    0.94
  -6  -2  -4   38.75    2.96
  -6  -2  -4   37.28    3.19
  -2   8  -4   43.22    2.69
  -6  -2  -4   41.84    2.84
   8  -6  -4   44.05    2.73
   2  -8   4   43.37    3.48
   6   2   4   43.40    2.96
   2  -8   4   49.61    2.94
  -1   7  -4   22.05    1.85
  -6  -1  -4   18.25    2.02
  -6  -1  -4   17.62    2.13
   7  -6  -4   20.90    1.78
  -6  -1  -4   17.93    1.86
   1  -7   4   20.50    2.38
   1  -7   4   20.33    1.86
   6   1   4   17.13    1.76
  -6   0  -4   23.36    2.13
   0   6  -4   24.94    1.87
  -6   0  -4   22.33    2.05
   6  -6  -4   22.89    1.68
  -6   0  -4   23.01    2.22
  -6   6   4   23.23    1.58
   6   0   4   29.16    2.14
   0  -6   4   26.09    1.98
   0  -6   4   21.96    2.38
   0  -6   4   24.54    2.13
   5  -6  -4   29.58    1.75
  -6   1  -4   25.55    2.27
  -6   1  -4   30.47    2.15
   1   5  -4   29.28    2.07
  -6   1  -4   28.37    2.20
  -1  -5   4   38.12    2.37
  -1  -5   4   35.18    2.41
  -1  -5   4   38.23    2.85
  -5   6   4   38.04    2.11
   6  -1   4   33.31    2.44
  -6   2  -4   33.91    2.41
   4  -6  -4   32.54    1.72
   2   4  -4   32.94    2.21
   4  -6  -4   34.63    1.77
  -6   2  -4   31.33    2.25
  -2  -4   4   34.06    2.61
   6  -2   4   31.91    2.28
  -2  -4   4   33.69    2.20
  -4   6   4   33.64    2.17
   3  -6  -4   57.05    2.62
   3   3  -4   57.01    3.11
   3  -6  -4   58.64    3.42
  -6   3  -4   59.05    3.23
   3  -6  -4   54.80    2.60
  -6   3  -4   59.46    3.25
  -3  -3   4   58.60    3.16
  -3  -3   4   61.02    3.68
   6  -3   4   62.54    3.33
   2  -6  -4   59.97    3.36
   4   2  -4   58.91    3.16
   2  -6  -4   57.38    3.52
   2  -6  -4   57.54    2.66
   4   2  -4   58.84    2.92
  -4  -2   4   63.20    3.73
  -4  -2   4   61.80    3.25
   6  -4   4   64.13    3.45
   1  -6  -4    1.12    1.04
   1  -6  -4    1.29    1.22
   1  -6  -4    2.95    0.53
   5   1  -4    0.03    0.39
   5   1  -4    2.89    0.79
   6  -5   4    3.37    0.97
  -5  -1   4    3.07    1.22
  -5  -1   4    4.46    0.91
  -1   6   4    3.66    0.45
   0  -6  -4   62.28    3.88
   6   0  -4   66.05    3.47
   0  -6  -4   68.50    3.02
   0  -6  -4   61.85    3.64
   6   0  -4   60.36    3.00
  -6   0   4   67.84    4.03
  -6   0   4   69.17    3.45
   6  -6   4   66.88    3.61
   0   6   4   62.12    3.00
  -1  -6  -4    2.33    1.44
  -1  -6  -4    3.33    0.69
  -1  -6  -4    1.15    1.15
  -1  -6  -4    2.39    0.99
   7  -1  -4    3.15    0.67
   7  -1  -4    1.38    0.93
   6  -7   4    0.72    0.93
  -7   1   4    3.44    1.49
  -7   1   4    3.57    1.03
   1   6   4    2.54    0.70
  -2  -6  -4    5.34    1.46
  -2  -6  -4    5.48    1.74
   8  -2  -4    5.03    1.24
  -2  -6  -4    6.38    1.36
  -2  -6  -4    5.79    0.93
   2   6   4    7.83    1.08
  -8   2   4    6.36    1.31
   6  -8   4    7.15    1.49
  -8   2   4    5.15    1.68
   9  -3  -4   21.51    2.13
  -3  -6  -4   22.16    2.35
  -3  -6  -4   22.73    2.27
  -3  -6  -4   23.66    2.83
   6  -9   4   23.64    2.72
  -9   3   4   23.98    1.35
   3   6   4   23.21    2.00
   6  -9   4   26.78    2.37
  -9   3   4   25.76    2.30
  -4  -6  -4   10.88    2.35
  10  -4  -4    8.24    1.70
  -4  -6  -4    7.29    1.75
  -4  -6  -4   11.65    1.75
 -10   4   4    7.59    1.73
   6 -10   4    9.60    2.17
   6 -10   4   11.30    1.79
  -5  -6  -4    6.58    1.86
  -5  -6  -4   11.74    2.52
  11  -5  -4    6.06    1.70
  -5  -6  -4    5.48    1.64
   6 -11   4    8.38    1.79
   6 -11   4    6.09    2.12
 -11   5   4    2.47    1.67
  -6  -6  -4    5.67    2.39
  -6  -6  -4    7.19    1.74
  -6  -6  -4    5.93    2.02
  12  -6  -4    5.36    1.78
 -12   6   4    2.39    1.77
   6 -12   4    0.64    2.10
  -7  -6  -4    6.64    2.67
  13  -7  -4    9.13    2.12
  -7  -6  -4    8.13    2.21
 -13   7   4    4.85    2.25
   6 -13   4    1.20    2.53
  -7  -5  -4    5.87    2.07
  -7  -5  -4    8.46    2.63
  12  -7  -4    8.59    1.94
  -7  -5  -4   10.61    1.99
   5 -12   4   11.07    2.70
 -12   7   4   12.01    2.26
  11  -7  -4    3.26    1.52
  -7  -4  -4    6.25    1.73
  -7  -4  -4    6.35    1.77
  -7  -4  -4    5.71    2.31
   4 -11   4    2.38    2.10
 -11   7   4    5.24    1.83
   7   4   4    2.86    1.63
  10  -7  -4    9.29    1.64
  -7  -3  -4   11.45    2.15
  -7  -3  -4   10.98    2.43
  -7  -3  -4    8.95    1.77
   3 -10   4    8.86    2.20
   7   3   4   10.99    1.74
  -7  -2  -4   18.79    2.06
  -7  -2  -4   11.94    1.92
   9  -7  -4   13.16    1.71
  -2   9  -4   16.26    1.72
  -7  -2  -4   12.21    2.18
   2  -9   4   12.78    2.32
   7   2   4   14.30    1.85
  -7  -1  -4   29.30    2.99
   8  -7  -4   32.51    2.37
  -1   8  -4   33.14    2.37
  -7  -1  -4   33.78    2.63
  -7  -1  -4   28.85    2.79
   1  -8   4   29.54    3.07
   7   1   4   36.01    2.74
  -7   0  -4    9.90    1.66
  -7   0  -4   11.47    1.57
  -7   0  -4    8.21    1.70
   7  -7  -4    8.08    1.18
   0   7  -4    9.02    1.37
   0  -7   4   10.47    1.94
   7   0   4    8.92    1.43
  -7   7   4    7.77    0.99
   0  -7   4   10.66    1.61
  -7   1  -4   10.91    1.60
  -7   1  -4   10.48    1.46
   6  -7  -4    8.19    1.05
  -7   1  -4    9.14    1.68
   1   6  -4   11.18    1.38
  -1  -6   4   11.32    1.57
  -1  -6   4   10.75    1.94
   7  -1   4    7.32    1.29
   5  -7  -4   25.87    1.63
  -7   2  -4   24.88    2.11
  -7   2  -4   26.66    2.24
   5  -7  -4   23.07    1.51
   2   5  -4   25.12    2.06
   7  -2   4   24.55    2.24
  -2  -5   4   26.50    2.14
  -2  -5   4   27.33    2.69
   4  -7  -4   15.99    1.20
   3   4  -4   19.20    1.71
  -7   3  -4   17.00    1.87
   4  -7  -4   15.21    1.99
   4  -7  -4   16.15    1.25
  -7   3  -4   18.11    1.78
  -3  -4   4   18.32    1.75
  -3  -4   4   16.59    1.99
   7  -3   4   16.07    1.69
   3  -7  -4   17.38    1.23
  -7   4  -4   18.31    1.88
  -7   4  -4   18.43    1.90
   3  -7  -4   16.56    2.12
   4   3  -4   22.08    1.87
   7  -4   4   16.53    1.76
  -4  -3   4   23.34    1.90
  -4  -3   4   22.40    2.31
   2  -7  -4   29.46    2.42
   2  -7  -4   31.63    2.76
   2  -7  -4   31.25    1.69
   5   2  -4   31.13    2.32
   7  -5   4   32.45    2.47
  -5  -2   4   32.82    2.80
  -5  -2   4   30.69    2.18
   6   1  -4   39.65    2.69
   1  -7  -4   44.64    3.02
   6   1  -4   39.87    2.32
   1  -7  -4   43.87    3.26
   1  -7  -4   43.18    2.17
  -6  -1   4   40.78    3.20
  -1   7   4   41.74    2.03
  -6  -1   4   41.85    2.67
   7  -6   4   48.79    2.95
   0  -7  -4    9.05    1.84
   0  -7  -4    7.04    1.52
   7   0  -4   10.88    1.56
   0  -7  -4    9.82    0.99
  -7   0   4    9.34    1.37
   0   7   4   10.33    0.97
   7  -7   4    9.77    1.52
  -7   0   4    7.73    1.84
  -1  -7  -4    1.31    1.60
   8  -1  -4    1.53    0.69
   8  -1  -4    0.86    1.08
  -1  -7  -4    3.01    0.78
  -1  -7  -4    2.25    1.33
  -8   1   4    2.21    1.48
   7  -8   4    2.53    1.19
  -8   1   4    2.64    1.12
   1   7   4    1.88    0.79
  -2  -7  -4   42.50    3.27
   9  -2  -4   49.26    3.32
  -2  -7  -4   45.42    3.82
  -9   2   4   49.96    3.33
   7  -9   4   49.77    3.39
  -9   2   4   48.74    3.87
  -3  -7  -4   20.60    2.48
  10  -3  -4   24.15    2.47
  -3  -7  -4   20.97    2.94
   7 -10   4   24.21    2.39
 -10   3   4   22.45    2.82
 -10   3   4   19.41    2.26
  -4  -7  -4    5.41    2.27
  -4  -7  -4    6.07    1.87
  11  -4  -4    7.04    1.77
   7 -11   4    7.15    1.80
 -11   4   4    6.80    1.82
  -5  -7  -4    7.56    2.64
  12  -5  -4    4.60    1.81
  -5  -7  -4   10.98    2.16
   7 -12   4    8.04    1.97
   7 -12   4    9.78    2.74
 -12   5   4    8.48    2.01
  13  -6  -4    2.45    1.77
  -6  -7  -4    3.49    1.98
  -6  -7  -4    7.44    2.65
 -13   6   4    1.99    1.90
   7 -13   4    0.17    2.27
   7 -13   4    4.43    1.86
  -8  -5  -4    9.35    1.97
  13  -8  -4    6.27    2.00
  -8  -5  -4    4.56    2.54
  -8  -5  -4    5.62    2.17
   5 -13   4    9.55    2.79
 -13   8   4    7.04    2.25
  -8  -4  -4    1.64    2.15
  -8  -4  -4    3.70    1.68
  12  -8  -4    4.77    1.66
  -8  -4  -4    1.09    1.79
   4 -12   4    5.20    2.40
 -12   8   4    1.06    1.82
  11  -8  -4    3.02    1.46
  -8  -3  -4    1.27    1.49
  -8  -3  -4    1.40    2.23
  -8  -3  -4    0.64    1.62
 -11   8   4    1.19    1.58
   3 -11   4    4.42    2.18
   8   3   4    3.11    1.54
  -8  -2  -4    7.36    2.21
  10  -8  -4    9.79    1.64
  -8  -2  -4    9.17    1.73
  -8  -2  -4   10.68    2.03
   2 -10   4    9.80    2.38
   8   2   4   12.39    1.86
  -8  -1  -4   11.03    2.25
  -8  -1  -4   11.73    1.84
  -1   9  -4   13.68    1.67
  -8  -1  -4   10.56    1.87
   9  -8  -4   13.87    1.69
   8   1   4   15.46    1.97
   1  -9   4   12.45    2.51
  -8   0  -4   16.98    1.97
   8  -8  -4   16.23    1.61
   0   8  -4   12.21    1.63
  -8   0  -4   15.52    2.02
  -8   0  -4   12.05    2.15
   8   0   4   17.68    2.07
   0  -8   4   19.01    2.24
   0  -8   4   20.48    2.67
   7  -8  -4    1.68    0.91
   1   7  -4    1.94    1.03
  -8   1  -4    3.33    1.67
  -8   1  -4    1.00    1.23
  -8   1  -4    0.65    1.17
  -1  -7   4    3.59    1.79
  -1  -7   4    3.27    1.34
   8  -1   4    1.85    1.27
  -8   2  -4   30.14    2.52
   2   6  -4   36.14    2.52
  -8   2  -4   34.03    2.79
  -8   2  -4   33.08    2.86
   6  -8  -4   36.77    2.14
   6  -8  -4   29.81    1.95
   8  -2   4   36.25    2.81
  -2  -6   4   33.17    2.62
  -2  -6   4   30.49    3.05
  -8   3  -4   18.05    1.87
  -8   3  -4   13.86    1.88
   5  -8  -4   17.69    1.42
   5  -8  -4   16.93    1.32
   3   5  -4   16.71    1.78
  -3  -5   4   17.71    1.91
   8  -3   4   17.49    1.92
  -3  -5   4   17.11    2.35
  -8   4  -4    2.71    1.30
  -8   4  -4    3.85    1.30
   4  -8  -4    3.89    1.47
   4   4  -4    4.97    1.23
   4  -8  -4    3.10    0.76
   4  -8  -4    3.12    0.72
  -4  -4   4    5.24    1.21
  -4  -4   4    5.33    1.57
   8  -4   4    4.28    1.20
   5   3  -4   28.14    2.36
   3  -8  -4   26.89    2.78
   3  -8  -4   29.06    1.73
  -8   5  -4   30.51    2.57
  -8   5  -4   32.84    2.75
   8  -5   4   30.25    2.49
  -5  -3   4   29.42    2.85
  -5  -3   4   32.45    2.36
   2  -8  -4    1.94    1.30
   2  -8  -4    1.66    0.62
   2  -8  -4   -0.67    1.45
   6   2  -4    2.74    1.17
  -6  -2   4    1.36    1.04
   8  -6   4    2.48    1.20
  -6  -2   4    2.04    1.45
   1  -8  -4    0.50    0.61
   1  -8  -4    4.17    1.45
   1  -8  -4    1.11    1.56
   7   1  -4    1.14    1.16
   8  -7   4    1.25    1.12
  -7  -1   4    2.32    1.14
  -7  -1   4    2.17    1.56
  -1   8   4    0.44    0.50
   0  -8  -4   -0.53    1.53
   8   0  -4    0.23    1.10
   0  -8  -4    1.40    1.40
  -8   0   4   -0.19    1.04
  -8   0   4    1.40    1.54
   8  -8   4    0.19    1.18
  -1  -8  -4   -1.21    1.66
   9  -1  -4    0.35    1.23
  -1  -8  -4    0.14    1.37
  -9   1   4    0.18    1.16
   8  -9   4    2.02    1.38
  -9   1   4    2.20    1.73
  -2  -8  -4    1.03    1.94
  10  -2  -4    4.92    1.50
  -2  -8  -4    2.63    1.57
   8 -10   4    4.53    1.57
 -10   2   4    1.95    1.40
 -10   2   4    4.58    1.98
  -3  -8  -4    5.51    2.36
  -3  -8  -4    5.93    1.82
  11  -3  -4    4.98    1.72
 -11   3   4    4.71    2.17
   8 -11   4    7.04    1.79
 -11   3   4    3.01    1.64
  -4  -8  -4   -2.67    1.97
  -4  -8  -4    5.05    1.93
  12  -4  -4    4.52    1.71
 -12   4   4    3.31    2.24
 -12   4   4    5.17    1.79
   8 -12   4    7.51    1.90
  -5  -8  -4    2.86    2.56
  13  -5  -4    1.73    1.88
  -5  -8  -4    2.27    1.88
 -13   5   4    1.07    1.92
 -13   5   4    3.71    2.51
   8 -13   4    4.23    1.96
  13  -9  -4   -0.64    1.54
  -9  -4  -4   -3.22    1.69
  -9  -4  -4    1.02    2.43
  -9  -4  -4    2.44    1.65
 -13   9   4   -2.33    1.81
   4 -13   4    1.51    2.17
  12  -9  -4    3.06    1.64
  -9  -3  -4    3.82    2.00
  -9  -3  -4    5.06    2.49
  -9  -3  -4    1.88    1.65
   3 -12   4   -1.89    1.99
 -12   9   4    4.78    1.91
  -9  -2  -4    1.71    2.09
  11  -9  -4   -0.27    1.34
  -9  -2  -4   -0.07    1.59
  -9  -2  -4   -1.39    1.46
   9   2   4    0.23    1.46
   2 -11   4   -0.90    1.94
  -9  -1  -4   12.55    2.14
  10  -9  -4    6.71    1.49
  -9  -1  -4    7.74    2.25
  -9  -1  -4    7.42    1.82
   9   1   4    5.94    1.69
   1 -10   4    7.47    2.26
   9  -9  -4    6.69    1.37
  -9   0  -4    5.25    1.73
   0   9  -4    6.39    1.72
  -9   0  -4    6.29    2.09
  -9   0  -4    5.30    1.58
   9   0   4    5.34    1.63
   0  -9   4    5.16    2.07
   0  -9   4    6.82    1.67
   8  -9  -4   25.15    2.16
   1   8  -4   25.15    2.31
  -9   1  -4   23.43    2.34
  -9   1  -4   22.10    2.53
  -9   1  -4   22.71    2.80
  -1  -8   4   26.80    2.63
   9  -1   4   24.33    2.43
  -1  -8   4   22.27    2.89
  -9   2  -4   13.26    2.22
  -9   2  -4   13.60    1.99
   2   7  -4   21.27    2.07
  -9   2  -4   15.33    1.90
   7  -9  -4   15.31    1.48
  -2  -7   4   18.81    2.18
   9  -2   4   13.40    1.87
  -2  -7   4   17.45    2.61
  -9   3  -4   -1.38    1.06
   6  -9  -4    0.54    0.80
  -9   3  -4    0.95    1.35
   3   6  -4   -0.15    1.05
   9  -3   4    0.87    1.29
  -3  -6   4    0.86    1.17
  -3  -6   4    1.29    1.64
   4   5  -4   27.62    2.36
  -9   4  -4   23.12    2.44
   5  -9  -4   23.96    1.76
   5  -9  -4   21.33    2.70
  -9   4  -4   25.71    2.31
   9  -4   4   21.56    2.30
  -4  -5   4   23.81    2.76
  -4  -5   4   26.26    2.36
   4  -9  -4   11.31    1.20
   5   4  -4   13.30    1.74
   4  -9  -4   10.65    2.04
   4  -9  -4   11.49    1.27
  -9   5  -4   12.78    1.97
  -9   5  -4   14.03    1.87
  -5  -4   4   10.61    1.60
  -5  -4   4   11.33    2.14
   9  -5   4    9.58    1.61
   3  -9  -4   19.19    2.62
   6   3  -4   22.04    2.20
  -9   6  -4   20.94    2.30
  -9   6  -4   18.27    2.30
  -6  -3   4   24.21    2.74
  -6  -3   4   16.22    1.96
   9  -6   4   17.17    1.98
   2  -9  -4    1.47    1.33
   2  -9  -4    0.17    1.60
   7   2  -4    3.39    1.27
   9  -7   4    2.58    1.33
  -7  -2   4   -0.36    1.50
  -7  -2   4    0.93    1.18
   1  -9  -4   13.87    2.13
   8   1  -4   16.10    2.05
   1  -9  -4   17.02    2.59
  -8  -1   4   17.84    2.57
   9  -8   4   12.61    1.88
  -8  -1   4   12.81    1.81
   9   0  -4   22.93    2.41
   0  -9  -4   18.39    2.84
   0  -9  -4   18.68    2.44
  -9   0   4   21.30    2.91
  -9   0   4   24.34    2.43
   9  -9   4   23.63    2.42
  -1  -9  -4    8.40    1.95
  10  -1  -4   11.03    1.87
  -1  -9  -4    5.09    2.37
   9 -10   4    9.10    1.83
 -10   1   4    4.98    1.65
 -10   1   4   10.03    2.40
  -2  -9  -4   -1.43    1.91
  -2  -9  -4    0.51    1.61
  11  -2  -4   -0.83    1.50
 -11   2   4   -0.46    1.46
 -11   2   4   -1.52    1.89
   9 -11   4    2.89    1.63
  -3  -9  -4    8.18    2.20
  12  -3  -4    6.37    1.92
  -3  -9  -4    9.13    2.66
 -12   3   4    0.31    2.21
 -12   3   4    9.08    2.00
   9 -12   4   11.52    2.15
  -4  -9  -4    8.64    2.27
  13  -4  -4    7.67    2.02
  -4  -9  -4   11.07    2.96
 -13   4   4   15.11    3.27
   9 -13   4   13.08    2.25
 -13   4   4    5.48    2.12
  12 -10  -4   12.47    2.02
 -10  -2  -4    9.09    2.65
 -10  -2  -4   10.86    2.18
 -10  -2  -4    8.56    2.33
   2 -12   4    8.30    2.78
  11 -10  -4    6.49    1.60
 -10  -1  -4    9.72    2.68
 -10  -1  -4    9.72    2.19
 -10  -1  -4    4.35    1.80
   1 -11   4    7.44    2.49
  10   1   4    9.85    1.98
  10 -10  -4    3.22    1.31
 -10   0  -4    0.56    1.44
 -10   0  -4    0.14    1.93
 -10   0  -4    1.95    1.67
   0 -10   4    1.54    2.09
   0 -10   4    0.03    1.56
  10   0   4    1.78    1.46
 -10   1  -4    0.42    1.86
 -10   1  -4    0.13    1.47
   9 -10  -4    1.99    1.19
 -10   1  -4    1.52    1.41
  -1  -9   4   -0.93    1.70
  10  -1   4    3.14    1.53
  -1  -9   4   -0.57    1.47
   2   8  -4   10.12    1.63
 -10   2  -4    9.15    2.27
 -10   2  -4    9.11    1.92
 -10   2  -4    9.69    1.74
   8 -10  -4   10.60    1.42
  -2  -8   4    9.92    1.92
  10  -2   4    9.60    1.88
  -2  -8   4   13.48    2.68
 -10   3  -4   13.89    2.15
 -10   3  -4   13.35    1.86
   3   7  -4   14.17    1.87
   7 -10  -4   14.19    1.49
 -10   3  -4   12.89    2.40
  10  -3   4    9.27    1.75
  -3  -7   4    9.08    1.81
  -3  -7   4   15.71    2.57
   6 -10  -4    2.25    0.92
 -10   4  -4    1.98    1.55
   4   6  -4    3.97    1.38
 -10   4  -4   -0.19    1.26
  -4  -6   4    1.54    1.29
  -4  -6   4    3.16    1.70
  10  -4   4    0.66    1.29
 -10   5  -4    7.06    1.61
   5   5  -4    6.99    1.56
   5 -10  -4    7.83    1.08
   5 -10  -4    7.79    2.12
 -10   5  -4    5.04    1.73
  10  -5   4    6.70    1.62
  -5  -5   4    7.59    1.60
  -5  -5   4    7.15    1.88
   6   4  -4   14.60    1.90
 -10   6  -4   11.03    2.09
 -10   6  -4   12.43    1.96
   4 -10  -4   13.44    2.50
  -6  -4   4   12.58    1.84
  10  -6   4    9.65    1.75
  -6  -4   4   13.14    2.49
 -10   7  -4   31.83    2.86
 -10   7  -4   27.12    2.96
   3 -10  -4   29.06    3.22
   7   3  -4   30.78    2.82
  -7  -3   4   30.29    2.72
  10  -7   4   30.96    2.85
  -7  -3   4   31.19    3.28
   2 -10  -4    3.16    2.00
   8   2  -4    5.84    1.57
   2 -10  -4    1.51    1.55
  -8  -2   4    2.10    1.93
  -8  -2   4    4.37    1.48
  10  -8   4    5.06    1.65
   1 -10  -4   18.52    2.99
   1 -10  -4   20.88    2.70
   9   1  -4   24.68    2.56
  -9  -1   4   20.98    3.01
  10  -9   4   21.76    2.47
  -9  -1   4   20.37    2.35
   0 -10  -4   29.52    3.47
  10   0  -4   26.63    2.91
   0 -10  -4   25.06    2.93
  10 -10   4   24.57    2.62
 -10   0   4   26.55    2.72
 -10   0   4   20.18    3.09
  -1 -10  -4    8.30    2.69
  -1 -10  -4    5.28    2.08
  11  -1  -4    8.04    1.92
 -11   1   4    9.68    2.60
 -11   1   4    6.19    1.83
  10 -11   4    5.89    1.88
  12  -2  -4    8.51    2.13
  -2 -10  -4    8.11    2.78
  -2 -10  -4    8.48    2.28
  10 -12   4    7.40    2.01
 -12   2   4    6.74    2.08
 -12   2   4    8.12    2.72
 -11  -1  -4   12.33    2.55
  12 -11  -4   11.76    1.91
 -11  -1  -4    7.61    2.10
 -11  -1  -4   15.14    3.13
   1 -12   4   16.90    3.23
  11   1   4   10.55    2.31
 -11   0  -4    7.26    2.04
  11 -11  -4    6.09    1.59
 -11   0  -4    6.24    2.71
 -11   0  -4    4.90    1.83
  11   0   4    2.37    1.76
   0 -11   4    5.43    2.58
 -11   1  -4    4.44    1.96
 -11   1  -4    0.63    1.50
  10 -11  -4    5.23    1.44
 -11   1  -4    3.52    2.21
  11  -1   4    2.61    1.65
  -1 -10   4    1.48    2.09
  -1 -10   4    3.40    1.82
 -11   2  -4   15.39    2.70
 -11   2  -4   18.32    2.57
 -11   2  -4   16.31    2.18
   9 -11  -4   20.02    1.92
  -2  -9   4   14.43    2.89
  11  -2   4   13.03    2.15
  -2  -9   4   19.05    2.46
 -11   3  -4   11.53    2.16
 -11   3  -4   14.36    2.02
   8 -11  -4   12.28    1.50
 -11   3  -4   11.57    2.44
  -3  -8   4   16.44    2.89
  -3  -8   4   12.59    2.14
  11  -3   4    8.98    2.03
   4   7  -4    6.14    1.62
   7 -11  -4    5.04    1.11
 -11   4  -4    3.06    1.54
 -11   4  -4    3.49    1.72
  11  -4   4    5.95    1.69
  -4  -7   4    6.95    1.75
  -4  -7   4    6.48    2.28
   5   6  -4   12.52    1.94
 -11   5  -4   10.35    1.75
   6 -11  -4    7.53    2.40
   6 -11  -4   12.45    1.36
 -11   5  -4   12.85    2.25
  11  -5   4   11.27    1.97
  -5  -6   4   11.71    2.50
  -5  -6   4   13.07    2.02
   5 -11  -4   18.50    3.00
 -11   6  -4   17.93    2.23
 -11   6  -4   20.84    2.65
   6   5  -4   23.13    2.44
   5 -11  -4   20.22    1.83
  -6  -5   4   16.23    2.22
  -6  -5   4   17.65    2.80
  11  -6   4   18.52    2.44
 -11   7  -4   11.90    2.28
   4 -11  -4   12.86    2.64
   7   4  -4   11.63    1.89
 -11   7  -4   14.13    2.17
  -7  -4   4   16.29    2.89
  11  -7   4   14.39    2.22
  -7  -4   4   13.43    1.95
   8   3  -4    0.51    1.37
   3 -11  -4   -1.81    1.75
 -11   8  -4    2.71    1.93
 -11   8  -4    3.11    1.70
  -8  -3   4    1.46    1.43
  -8  -3   4    0.79    1.93
  11  -8   4    1.40    1.46
   2 -11  -4    4.25    2.25
   2 -11  -4    5.81    1.99
   9   2  -4    4.05    1.73
  -9  -2   4    2.51    2.15
  11  -9   4    6.40    1.85
  -9  -2   4    5.10    1.65
   1 -11  -4    4.59    2.37
  10   1  -4    7.21    1.86
   1 -11  -4    6.33    2.01
  11 -10   4   10.88    2.10
 -10  -1   4    5.32    1.83
 -10  -1   4    8.22    2.62
   0 -11  -4    5.01    2.51
  11   0  -4    4.10    1.82
   0 -11  -4    3.73    1.92
 -11   0   4    2.55    2.32
  11 -11   4    1.73    1.83
 -11   0   4    1.15    1.56
  -1 -11  -4   -1.83    1.68
  12  -1  -4    4.57    1.83
  -1 -11  -4   -3.66    2.16
 -12   1   4   -0.71    1.80
  11 -12   4    0.18    1.86
 -12   1   4   -1.33    2.19
 -12   1  -4    2.27    2.09
 -12   1  -4   -1.08    2.21
  11 -12  -4   -0.54    1.34
  12  -1   4   -0.14    1.64
  -1 -11   4   -2.38    1.66
  -1 -11   4    2.21    2.41
 -12   2  -4    2.85    2.25
  10 -12  -4    4.97    1.35
 -12   2  -4    1.29    2.01
  -2 -10   4    5.98    2.37
  12  -2   4    5.21    2.06
  -2 -10   4    6.68    2.08
   9 -12  -4    0.42    1.06
 -12   3  -4   -0.66    1.68
 -12   3  -4   -1.40    2.06
  -3  -9   4   -1.12    1.51
  -3  -9   4    2.80    2.26
  12  -3   4    0.46    1.68
 -12   4  -4    3.51    2.17
 -12   4  -4    1.61    1.96
   8 -12  -4    1.79    1.06
  -4  -8   4    3.12    1.70
  12  -4   4    2.32    1.77
  -4  -8   4    3.65    2.29
   7 -12  -4    0.21    0.95
 -12   5  -4    1.47    1.74
 -12   5  -4    2.66    1.61
  -5  -7   4    0.95    1.52
  -5  -7   4    1.44    2.10
  12  -5   4    1.10    1.61
   6 -12  -4    3.95    1.06
 -12   6  -4    0.31    1.40
 -12   6  -4    5.34    2.15
   6 -12  -4    0.04    2.15
   6   6  -4    2.23    1.55
  -6  -6   4    3.40    2.27
  12  -6   4    1.59    1.63
  -6  -6   4    7.49    1.84
   7   5  -4    0.51    1.52
 -12   7  -4    1.74    1.58
   5 -12  -4    1.38    0.92
 -12   7  -4    2.45    1.95
   5 -12  -4    1.38    2.20
  -7  -5   4    4.14    2.23
  -7  -5   4    3.35    1.56
  12  -7   4    0.13    1.69
 -12   8  -4    3.29    2.06
   4 -12  -4    3.34    2.24
   8   4  -4    3.93    1.59
 -12   8  -4    6.04    1.87
  -8  -4   4    4.56    2.48
  12  -8   4    3.57    1.78
  -8  -4   4    4.59    1.66
   9   3  -4    2.77    1.68
 -12   9  -4    6.22    2.26
   3 -12  -4    2.83    2.20
 -12   9  -4    1.98    1.95
  12  -9   4    4.08    1.97
  -9  -3   4    2.92    1.77
  -9  -3   4    4.81    2.49
   2 -12  -4    6.38    2.46
  10   2  -4    3.57    1.86
 -10  -2   4    6.86    1.95
 -10  -2   4    1.43    2.22
  12 -10   4    1.92    1.84
   1 -12  -4   -0.40    1.93
  11   1  -4    0.51    1.75
   1 -12  -4    1.98    2.41
 -11  -1   4    3.30    2.52
  12 -11   4   -0.09    1.79
 -11  -1   4    1.52    1.77
 -13   4  -4    2.57    2.53
 -13   4  -4   -1.21    2.01
   9 -13  -4    1.49    1.15
  13  -4   4   -1.74    1.65
  -4  -9   4    0.49    2.31
  -4  -9   4    3.06    1.80
 -13   5  -4    5.63    2.32
 -13   5  -4    3.40    2.35
   8 -13  -4    2.75    1.16
  13  -5   4    5.13    2.04
  -5  -8   4    8.20    2.04
  -5  -8   4    2.97    2.50
 -13   6  -4    1.70    2.01
   7 -13  -4    3.37    1.13
  13  -6   4   -0.32    1.68
  -6  -7   4    5.68    2.72
  -6  -7   4    3.61    1.86
   6 -13  -4    2.32    2.43
   6 -13  -4    3.69    1.10
 -13   7  -4    0.59    2.17
  -7  -6   4    0.85    1.64
  -7  -6   4    3.97    2.39
  13  -7   4    2.46    1.85
   8   5  -4    6.03    2.07
   5 -13  -4    5.10    1.26
 -13   8  -4    4.64    2.37
   5 -13  -4   10.69    2.91
  -8  -5   4    3.13    2.50
  -8  -5   4    3.44    1.84
  13  -8   4    9.04    2.39
   9   4  -4    8.18    2.03
 -13   9  -4    5.55    2.38
   4 -13  -4    6.23    2.58
  13  -9   4    3.20    2.03
  -9  -4   4   12.35    2.22
  -9  -4   4    5.26    2.79
   0   0  -5    0.62    0.65
   0   0  -5    0.46    0.36
   0   0  -5    0.75    0.47
   0   0   5    0.16    0.32
   0   0   5    0.20    0.43
   0   0   5    0.08    0.31
  -1   0  -5   30.27    1.78
  -1   0  -5   29.08    1.56
  -1   0  -5   27.37    1.52
   0   1  -5   31.35    1.56
   1  -1  -5   27.10    1.35
   1  -1  -5   28.51    1.48
  -1   0  -5   26.66    1.23
   1  -1  -5   29.31    1.56
   1   0   5   27.13    1.54
   0  -1   5   25.44    1.48
   1   0   5   25.13    1.41
  -1   1   5   28.37    1.26
   1   0   5   25.95    1.71
  -1   1   5   26.52    1.46
   0  -1   5   25.66    1.43
  -1   1   5   24.86    1.33
   1   0   5   25.60    1.46
   0  -1  -5   28.10    1.52
   0  -1  -5   29.62    1.45
  -1   1  -5   31.90    1.41
   0  -1  -5   31.25    1.72
  -1   1  -5   28.02    1.66
   0  -1  -5   25.76    1.45
   1   0  -5   26.82    1.62
   0   1   5   32.60    1.68
   0   1   5   27.23    1.48
   1  -1   5   30.84    1.41
   0   1   5   27.29    1.46
   0   1   5   30.27    1.52
  -1   0   5   29.28    1.58
   0   1   5   30.71    1.49
  -1   0   5   30.06    1.61
  -1  -1  -5   33.54    1.73
  -1  -1  -5   29.53    1.74
  -1   2  -5   36.48    1.85
   2  -1  -5   31.65    1.62
   2  -1  -5   36.18    1.75
  -1   2  -5   33.79    1.95
  -1  -1  -5   33.89    1.85
  -1  -1  -5   39.46    2.04
   1   1   5   38.17    1.94
  -2   1   5   37.69    1.85
   1  -2   5   39.97    2.02
   1   1   5   38.18    1.84
   1   1   5   38.35    2.09
   1   1   5   39.97    1.86
   1   1   5   34.86    1.85
   1  -2   5   38.21    2.04
   3  -2  -5   52.82    2.43
  -1   3  -5   54.41    2.67
  -1   3  -5   52.97    2.68
  -2  -1  -5   46.09    2.59
  -2  -1  -5   51.13    2.73
  -2  -1  -5   47.73    2.63
  -1   3  -5   54.31    2.57
   3  -2  -5   53.67    2.20
  -2  -1  -5   49.59    2.50
  -3   2   5   49.99    2.28
   2   1   5   50.00    2.39
   2   1   5   45.59    2.40
  -3   2   5   48.62    2.12
   2   1   5   43.94    2.46
   1  -3   5   55.65    2.58
   1  -3   5   50.28    2.64
   2  -2  -5    5.93    0.59
  -2   0  -5    7.13    0.90
  -2   0  -5    7.11    1.01
   0   2  -5    7.08    0.90
   0   2  -5    7.60    0.92
  -2   0  -5    5.37    0.75
   2  -2  -5    7.49    0.67
   0   2  -5    7.75    0.75
  -2   0  -5    5.46    0.69
  -2   2   5    6.74    0.71
   0  -2   5    8.43    0.90
   0  -2   5    8.05    0.97
  -2   2   5    7.77    0.71
   2   0   5    6.89    0.85
  -2   2   5    7.61    0.62
   2   0   5    7.17    0.84
   1   1  -5   20.19    1.43
   1  -2  -5   21.77    1.33
   1   1  -5   19.62    1.42
   1  -2  -5   19.53    1.25
  -2   1  -5   20.97    1.43
  -2   1  -5   22.75    1.64
   1  -2  -5   17.11    1.02
   1   1  -5   19.95    1.08
  -1   2   5   20.00    1.33
  -1   2   5   19.68    1.25
  -1   2   5   18.55    0.92
  -1   2   5   18.50    0.94
  -1   2   5   21.65    1.30
   2  -1   5   20.99    1.47
  -1  -1   5   20.76    1.42
  -1  -1   5   21.02    1.10
  -1  -1   5   21.73    1.35
   0  -2  -5  179.78    7.56
   2   0  -5  179.88    7.56
   0  -2  -5  177.84    7.35
   2   0  -5  181.38    7.31
   0  -2  -5  171.40    7.54
  -2   2  -5  189.36    7.50
   0  -2  -5  171.64    7.55
   2  -2   5  182.52    7.78
   0   2   5  186.69    7.75
   0   2   5  188.18    7.72
   2  -2   5  187.42    7.68
   0   2   5  177.30    7.74
   0   2   5  190.64    7.48
  -2   0   5  190.31    7.86
   0   2   5  169.61    7.49
  -2   0   5  180.85    7.49
   3  -1  -5  165.82    6.80
  -1  -2  -5  166.16    7.21
   3  -1  -5  162.49    7.09
  -1  -2  -5  169.03    7.20
  -2   3  -5  171.26    7.20
  -1  -2  -5  173.64    6.99
  -2   3  -5  172.97    7.23
  -1  -2  -5  157.02    7.18
   1   2   5  167.61    7.19
   1   2   5  173.40    7.19
  -3   1   5  172.71    7.08
   1   2   5  151.49    7.13
   2  -3   5  174.66    7.22
  -3   1   5  169.91    6.94
   1   2   5  162.35    6.93
   4  -2  -5   21.96    1.50
  -2  -2  -5   18.80    1.72
  -2  -2  -5   23.11    1.42
  -2  -2  -5   25.23    1.82
  -2  -2  -5   24.71    1.81
  -2   4  -5   23.94    1.68
  -4   2   5   25.35    1.46
   2   2   5   22.97    1.62
   2   2   5   25.69    1.43
   2  -4   5   24.40    1.88
  -4   2   5   24.97    1.46
   2   2   5   23.11    1.70
   2  -4   5   16.06    1.51
  -3  -2  -5   11.99    1.40
   5  -3  -5   11.43    1.13
  -3  -2  -5   13.42    1.40
  -2   5  -5   11.13    1.19
  -3  -2  -5   11.08    1.06
  -3  -2  -5   10.61    1.39
   3   2   5   10.05    1.30
   2  -5   5   10.45    1.49
   3   2   5   13.04    1.10
  -3  -1  -5   16.59    1.47
  -3  -1  -5   15.62    1.30
  -3  -1  -5   14.38    1.39
  -3  -1  -5   18.15    1.60
  -1   4  -5   16.58    1.45
  -1   4  -5   16.84    1.57
   4  -3  -5   17.27    1.24
   3   1   5   16.40    1.39
  -4   3   5   15.75    0.91
   3   1   5   16.64    1.59
   3   1   5   15.73    1.38
  -4   3   5   17.08    1.12
   1  -4   5   18.09    1.64
   0   3  -5   16.40    1.42
  -3   0  -5   13.35    1.19
  -3   0  -5   12.55    1.19
  -3   0  -5   12.57    1.28
   3  -3  -5   13.40    0.95
   0   3  -5   14.23    1.17
  -3   0  -5   12.71    1.25
   0   3  -5   15.06    1.33
  -3   3   5   12.68    0.86
  -3   3   5   13.51    1.12
   3   0   5   14.61    1.24
   3   0   5   14.20    1.30
   3   0   5   12.96    1.27
   0  -3   5   13.53    1.25
   0  -3   5   15.75    1.47
  -3   3   5   15.03    0.97
  -3   1  -5   11.97    1.28
  -3   1  -5   13.16    1.20
   2  -3  -5   10.78    0.71
   1   2  -5   11.57    1.12
  -3   1  -5   14.57    1.19
   2  -3  -5   13.11    1.05
   1   2  -5   12.74    1.02
   1   2  -5   13.95    1.30
  -2   3   5   11.75    0.99
  -1  -2   5    7.66    1.00
  -1  -2   5   13.77    1.06
  -1  -2   5   15.18    1.40
  -2   3   5   12.25    1.04
   3  -1   5   13.86    1.23
  -2   3   5   10.43    1.09
   1  -3  -5    3.81    0.81
   2   1  -5    5.38    0.83
  -3   2  -5    4.08    0.68
   2   1  -5    4.15    0.56
   1  -3  -5    2.67    0.81
   1  -3  -5    3.15    0.71
   2   1  -5    5.50    0.94
  -2  -1   5    4.41    0.59
  -2  -1   5    4.84    0.94
  -1   3   5    2.83    0.72
   3  -2   5    3.48    0.77
  -1   3   5    3.65    0.68
  -1   3   5    3.30    0.63
  -3   3  -5   58.77    2.84
   0  -3  -5   58.25    2.96
   0  -3  -5   60.21    2.51
   3   0  -5   52.24    2.84
   0  -3  -5   58.12    3.03
   3   0  -5   57.35    2.62
   0  -3  -5   56.29    2.85
   3  -3   5   55.21    2.86
   0   3   5   52.27    2.26
  -3   0   5   57.85    2.95
   0   3   5   51.48    2.27
  -3   0   5   57.71    2.48
   0   3   5   53.19    2.73
   0   3   5   55.24    2.72
   0   3   5   48.06    2.72
  -1  -3  -5   30.97    2.09
  -3   4  -5   31.95    1.95
   4  -1  -5   29.76    1.84
  -1  -3  -5   32.69    1.61
  -1  -3  -5   28.51    2.14
  -1  -3  -5   29.44    1.96
   1   3   5   32.26    2.01
  -4   1   5   33.17    1.73
   1   3   5   30.56    1.58
   3  -4   5   31.93    2.06
   1   3   5   27.77    1.96
  -2  -3  -5   28.08    2.13
   5  -2  -5   29.23    1.88
  -3   5  -5   32.55    2.41
  -2  -3  -5   27.94    2.08
  -2  -3  -5   28.75    2.01
  -2  -3  -5   30.09    1.69
  -3   5  -5   30.45    1.98
  -5   2   5   30.73    1.82
   2   3   5   31.24    2.15
   2   3   5   30.86    1.75
   3  -5   5   30.31    2.19
  -3  -3  -5   27.38    2.30
  -3  -3  -5   24.49    2.14
   6  -3  -5   27.38    1.89
  -3  -3  -5   24.81    1.65
  -3   6  -5   26.74    1.94
  -3  -3  -5   23.71    1.97
  -6   3   5   28.69    1.95
   3   3   5   26.53    1.79
   3  -6   5   28.85    1.99
   3  -6   5   28.00    2.28
   7  -4  -5   48.11    2.77
  -4  -3  -5   45.00    2.99
  -4  -3  -5   46.36    2.99
  -4  -3  -5   43.85    3.13
  -3   7  -5   50.41    2.86
   3  -7   5   48.60    2.89
   3  -7   5   47.37    3.36
  -7   4   5   49.06    2.87
   4   3   5   47.30    2.74
  -4  -2  -5    6.31    1.22
  -4  -2  -5    8.68    1.30
   6  -4  -5    7.14    1.01
  -4  -2  -5    8.46    1.45
  -2   6  -5    9.91    1.22
   4   2   5    7.15    1.04
   2  -6   5    9.55    1.20
   2  -6   5    6.84    1.45
  -4  -1  -5   51.89    2.92
  -4  -1  -5   48.20    2.93
  -4  -1  -5   47.90    2.85
   5  -4  -5   50.31    2.52
  -1   5  -5   50.59    2.76
  -5   4   5   48.80    2.13
   1  -5   5   40.81    2.57
   1  -5   5   48.70    2.95
   4   1   5   47.79    2.56
  -4   0  -5    2.67    0.90
  -4   0  -5    3.30    0.97
   4  -4  -5    5.54    0.66
   0   4  -5    5.38    0.93
   0   4  -5    5.16    1.33
  -4   0  -5    4.81    1.00
   0   4  -5    5.62    0.88
  -4   4   5    5.21    0.61
  -4   4   5    4.34    0.57
   0  -4   5    1.54    0.69
   0  -4   5    6.70    1.00
   4   0   5    4.45    0.84
   0  -4   5    5.41    1.20
   1   3  -5   30.23    1.72
   3  -4  -5   27.59    1.38
   1   3  -5   26.87    1.88
  -4   1  -5   28.86    1.96
   1   3  -5   25.78    1.99
  -4   1  -5   29.36    2.08
  -1  -3   5   32.24    2.22
  -3   4   5   29.86    1.84
  -3   4   5   27.79    1.61
   4  -1   5   32.36    1.95
  -1  -3   5   23.24    1.75
  -1  -3   5   28.91    1.79
  -3   4   5   29.91    1.97
   2   2  -5  110.54    4.73
   2   2  -5  119.18    5.13
  -4   2  -5  110.19    5.07
   2   2  -5  109.07    4.91
   2  -4  -5  108.16    4.93
   2  -4  -5  101.10    4.75
   2  -4  -5   98.91    4.98
  -4   2  -5  108.82    4.94
  -4   2  -5  105.39    4.94
  -2  -2   5  106.58    4.70
   4  -2   5  111.98    4.92
  -2  -2   5  105.74    4.80
  -2   4   5   98.28    4.67
  -2   4   5  107.37    4.99
  -2   4   5  102.41    4.77
  -2  -2   5  111.56    5.08
  -4   3  -5  145.53    6.17
   1  -4  -5  135.26    6.10
   3   1  -5  135.24    6.15
   1  -4  -5  140.93    6.37
   3   1  -5  143.07    5.96
   1  -4  -5  139.29    6.23
   1  -4  -5  135.04    5.67
   3   1  -5  142.31    5.90
  -1   4   5  136.28    5.97
  -1   4   5  124.89    6.11
   4  -3   5  134.77    6.10
  -3  -1   5  138.01    6.04
   4  -3   5  143.88    6.06
  -3  -1   5  139.13    5.85
  -3  -1   5  136.30    6.25
  -1   4   5  133.81    6.02
   0  -4  -5   20.61    1.72
   4   0  -5   18.41    1.53
   0  -4  -5   20.92    1.85
   4   0  -5   19.17    1.33
   0  -4  -5   18.76    1.08
   0  -4  -5   18.06    1.66
   4   0  -5   19.53    1.15
   4  -4   5   21.93    1.73
  -4   0   5   18.13    1.79
   0   4   5   16.21    0.93
   4  -4   5   17.78    1.50
   0   4   5   18.98    1.60
  -4   0   5   18.91    1.32
  -1  -4  -5   72.37    3.66
  -1  -4  -5   73.17    3.25
   5  -1  -5   73.96    3.55
  -1  -4  -5   74.63    3.73
   5  -1  -5   67.60    3.03
  -1  -4  -5   71.69    3.91
   1   4   5   73.69    3.30
   4  -5   5   74.67    3.88
  -5   1   5   71.92    3.48
   4  -5   5   75.18    3.67
  -2  -4  -5   89.66    4.65
   6  -2  -5   88.31    4.29
  -2  -4  -5   86.75    4.40
  -2  -4  -5   93.43    4.58
  -2  -4  -5   88.07    4.04
   4  -6   5   98.60    4.68
  -6   2   5   96.98    4.54
   2   4   5   92.51    4.35
   4  -6   5  103.34    4.96
  -3  -4  -5   24.60    1.68
  -3  -4  -5   24.75    2.31
  -3  -4  -5   28.36    2.16
  -3  -4  -5   20.44    2.26
   7  -3  -5   28.62    2.09
   4  -7   5   27.45    2.12
   3   4   5   26.38    1.85
  -7   3   5   28.41    2.12
   4  -7   5   27.45    2.55
   8  -4  -5   19.38    1.79
  -4  -4  -5   14.91    1.84
  -4  -4  -5   15.62    1.98
  -4  -4  -5   16.10    2.19
  -8   4   5   17.14    1.80
   4  -8   5   17.85    2.23
   4   4   5   21.01    1.73
  -5  -4  -5   10.57    2.12
  -4   9  -5   15.16    1.62
  -5  -4  -5   13.28    1.91
   9  -5  -5   15.07    1.74
  -5  -4  -5   12.06    1.88
  -9   5   5   12.07    1.75
   4  -9   5   11.11    2.16
   5   4   5   16.82    1.70
  -5  -3  -5   -0.09    1.27
  -3   8  -5    1.08    0.92
   8  -5  -5    1.36    1.03
  -5  -3  -5   -0.05    1.07
  -5  -3  -5    1.12    1.22
  -8   5   5    1.44    1.07
   5   3   5    1.28    0.97
   3  -8   5    2.77    1.44
   7  -5  -5   29.63    2.04
  -2   7  -5   27.61    2.13
  -5  -2  -5   28.68    2.59
  -5  -2  -5   27.64    2.30
  -5  -2  -5   25.73    2.33
   5   2   5   25.23    2.11
   2  -7   5   29.56    2.63
  -7   5   5   26.64    1.40
   2  -7   5   26.91    2.34
  -5  -1  -5   68.06    3.72
  -5  -1  -5   66.31    3.48
  -5  -1  -5   69.19    3.66
  -1   6  -5   66.93    3.51
  -5  -1  -5   60.98    3.70
   6  -5  -5   69.00    3.31
   1  -6   5   69.99    4.12
   1  -6   5   79.68    3.84
  -6   5   5   70.91    3.24
   5   1   5   72.12    3.70
   0   5  -5   21.24    1.69
  -5   0  -5   18.33    1.57
  -5   0  -5   22.29    1.88
  -5   0  -5   21.13    1.90
  -5   0  -5   18.47    1.82
   5  -5  -5   18.90    1.36
   5   0   5   18.77    1.68
   0  -5   5   21.07    2.19
   0  -5   5   19.58    1.73
   0  -5   5   21.11    1.76
  -5   5   5   21.26    1.33
   1   4  -5   23.59    1.89
  -5   1  -5   24.67    1.97
  -5   1  -5   26.42    2.08
   1   4  -5   27.01    1.82
   4  -5  -5   27.52    1.47
  -5   1  -5   27.38    2.04
   5  -1   5   28.17    1.99
  -1  -4   5   28.08    1.93
  -4   5   5   24.65    1.63
  -1  -4   5   28.49    1.93
  -4   5   5   27.42    2.01
  -1  -4   5   28.91    2.29
  -5   2  -5   68.61    3.68
   3  -5  -5   71.38    3.02
   2   3  -5   67.61    3.56
   3  -5  -5   70.69    3.83
  -5   2  -5   75.99    3.74
  -2  -3   5   72.74    3.53
  -3   5   5   74.63    3.48
  -3   5   5   69.98    3.79
  -2  -3   5   75.01    3.97
   2  -5  -5   42.52    2.54
   2  -5  -5   37.07    1.78
   2  -5  -5   46.50    2.78
  -5   3  -5   42.51    2.62
   3   2  -5   46.07    2.48
   2  -5  -5   42.06    2.29
  -3  -2   5   44.91    2.45
   5  -3   5   46.28    2.72
  -3  -2   5   48.54    2.97
   4   1  -5   60.29    2.80
   1  -5  -5   61.20    3.13
   4   1  -5   61.84    3.17
   1  -5  -5   59.71    3.42
   1  -5  -5   58.97    2.58
  -5   4  -5   62.58    3.18
   1  -5  -5   53.66    3.20
  -4  -1   5   65.35    3.18
  -4  -1   5   64.74    3.65
   0  -5  -5  110.05    5.20
   5   0  -5  111.80    5.02
   0  -5  -5  106.73    5.02
   5   0  -5  101.42    4.58
   5   0  -5  106.69    4.81
   0  -5  -5  108.20    4.57
   0  -5  -5  103.58    5.33
   0   5   5  106.23    4.62
  -5   0   5  113.19    5.53
  -5   0   5  110.86    4.98
   5  -5   5  113.14    5.29
  -1  -5  -5   29.11    2.51
   6  -1  -5   28.72    1.52
  -1  -5  -5   30.02    1.69
  -1  -5  -5   30.19    2.32
   6  -1  -5   32.12    2.12
  -1  -5  -5   29.45    2.16
   1   5   5   35.26    1.86
  -6   1   5   35.89    2.16
   5  -6   5   36.10    2.46
  -6   1   5   29.19    2.49
  -2  -5  -5   13.00    1.16
   7  -2  -5   12.71    1.42
  -2  -5  -5   12.69    1.77
  -2  -5  -5   14.80    1.97
  -2  -5  -5   11.90    1.54
   2   5   5   16.81    1.37
   5  -7   5   14.18    1.87
  -7   2   5   16.22    1.60
   5  -7   5   13.88    1.67
  -3  -5  -5    1.17    1.19
   8  -3  -5    2.26    1.10
  -3  -5  -5    3.47    1.53
  -3  -5  -5    1.27    0.69
  -3  -5  -5    1.37    1.22
   5  -8   5   -0.43    1.21
   3   5   5    1.07    0.81
  -8   3   5    2.40    1.11
  -4  -5  -5   18.88    2.49
  -4  -5  -5   16.98    2.07
   9  -4  -5   14.46    1.82
  -4  -5  -5   14.27    1.91
  -9   4   5   18.27    1.96
   4   5   5   13.34    1.57
   5  -9   5   18.59    2.36
  -5  -5  -5    8.29    1.71
  -5  -5  -5    9.62    2.24
  10  -5  -5    6.05    1.54
  -5  -5  -5    5.52    1.68
   5   5   5    9.00    2.18
 -10   5   5    9.02    1.82
   5 -10   5    4.85    1.94
  -6  -5  -5   11.33    2.19
  11  -6  -5   16.18    2.10
  -6  -5  -5   12.89    2.59
  -6  -5  -5   11.63    2.03
 -11   6   5   13.23    2.12
   5 -11   5   16.57    2.76
  -6  -4  -5   23.53    2.95
  -4  10  -5   23.05    2.23
  10  -6  -5   21.01    2.16
  -6  -4  -5   20.48    2.39
  -6  -4  -5   17.83    2.37
   6   4   5   21.68    2.11
   4 -10   5   25.75    3.01
 -10   6   5   22.26    2.43
  -6  -3  -5    2.87    1.45
  -6  -3  -5    0.39    1.31
  -3   9  -5    2.68    1.03
  -6  -3  -5    1.63    1.70
   9  -6  -5    1.61    1.09
   6   3   5    3.78    1.21
   3  -9   5    3.56    1.68
  -6  -2  -5   21.72    2.30
   8  -6  -5   20.04    1.84
  -6  -2  -5   18.39    2.33
  -2   8  -5   22.04    1.93
  -6  -2  -5   17.74    2.02
   2  -8   5   22.58    2.55
   6   2   5   16.23    1.77
  -8   6   5   17.74    1.23
  -6  -1  -5   22.36    2.27
  -6  -1  -5   21.73    2.37
  -1   7  -5   23.82    2.00
   7  -6  -5   25.08    1.90
  -6  -1  -5   27.76    2.36
   1  -7   5   22.57    2.44
  -7   6   5   20.01    1.43
   6   1   5   27.96    2.14
  -6   0  -5   15.75    1.71
  -6   0  -5   10.88    1.56
   6  -6  -5   14.30    1.26
  -6   0  -5   16.95    1.86
   0   6  -5   13.32    1.49
   0  -6   5   15.10    1.70
   6   0   5   15.39    1.53
   0  -6   5   14.33    1.98
  -6   6   5   13.82    1.27
  -6   1  -5    7.31    1.37
  -6   1  -5    6.96    1.27
   5  -6  -5    7.66    0.83
  -6   1  -5    7.03    1.32
   1   5  -5    5.73    1.09
  -1  -5   5    9.49    1.61
   6  -1   5    8.08    1.27
  -1  -5   5    7.46    1.20
  -5   6   5    6.30    0.93
  -6   2  -5   10.46    1.44
   4  -6  -5    9.86    0.81
   2   4  -5    8.32    1.23
  -6   2  -5    9.60    1.36
  -2  -4   5   10.50    1.27
   6  -2   5    8.78    1.28
  -2  -4   5   10.09    1.58
  -4   6   5   10.21    1.25
   3  -6  -5   57.74    2.62
   3  -6  -5   62.93    3.53
   3  -6  -5   59.84    2.61
  -6   3  -5   58.87    3.30
  -6   3  -5   59.00    3.38
   3   3  -5   58.08    3.20
  -3  -3   5   57.38    3.07
   6  -3   5   59.25    3.29
  -3  -3   5   59.73    3.60
   4   2  -5   57.55    3.17
   4   2  -5   58.05    3.12
   2  -6  -5   54.56    3.40
   2  -6  -5   50.78    2.44
   2  -6  -5   62.55    3.29
   4   2  -5   57.05    2.78
  -4  -2   5   54.22    2.88
  -4  -2   5   55.02    3.41
   6  -4   5   52.22    3.14
   1  -6  -5   20.82    1.20
   1  -6  -5   21.79    1.86
   5   1  -5   19.26    1.77
   1  -6  -5   23.34    2.10
   1  -6  -5   22.73    2.21
  -5  -1   5   20.29    1.69
  -5  -1   5   20.05    2.11
   6  -5   5   21.74    1.98
   6   0  -5    4.00    1.04
   0  -6  -5    5.18    1.26
   0  -6  -5    3.03    1.41
   6   0  -5    3.64    0.67
   0  -6  -5    2.88    1.07
   0  -6  -5    3.94    0.61
   0   6   5    4.54    0.57
  -6   0   5    3.27    1.40
   6  -6   5    4.23    1.11
  -6   0   5    4.87    0.99
  -1  -6  -5   82.40    3.87
   7  -1  -5   85.42    4.36
  -1  -6  -5   83.70    4.79
  -1  -6  -5   87.51    4.62
   7  -1  -5   81.44    3.74
  -1  -6  -5   89.39    4.44
   1   6   5   85.46    4.03
  -7   1   5   92.24    4.43
  -7   1   5   82.68    4.97
   6  -7   5   97.14    4.75
  -2  -6  -5    3.86    1.35
  -2  -6  -5    5.61    1.80
   8  -2  -5    4.23    1.23
  -2  -6  -5    3.53    1.19
  -2  -6  -5    4.03    0.85
  -8   2   5    4.39    1.25
  -8   2   5    7.08    1.75
   2   6   5    4.76    0.89
   6  -8   5    3.29    1.27
   9  -3  -5    2.29    1.25
  -3  -6  -5    6.03    1.90
  -3  -6  -5    2.10    1.24
  -3  -6  -5    3.52    1.51
   6  -9   5    3.05    1.40
  -9   3   5    4.51    1.37
   3   6   5    4.28    1.04
   6  -9   5    3.91    1.70
  10  -4  -5   18.00    2.11
  -4  -6  -5   24.37    2.60
  -4  -6  -5   22.13    2.91
  -4  -6  -5   18.49    2.18
   6 -10   5   23.77    2.91
 -10   4   5   24.82    2.42
   6 -10   5   23.13    2.47
  11  -5  -5   10.81    1.89
  -5  -6  -5    9.99    2.00
  -5  -6  -5   10.12    2.55
  -5  -6  -5    6.19    1.73
 -11   5   5    6.58    1.85
   6 -11   5   10.28    2.48
  -6  -6  -5    0.00    1.99
  -6  -6  -5    4.06    1.67
  12  -6  -5    5.72    1.78
  -6  -6  -5    4.45    1.91
 -12   6   5    1.33    1.81
   6 -12   5    1.73    2.16
  -7  -6  -5    0.64    1.77
  -7  -6  -5   -1.94    2.18
  13  -7  -5    0.45    1.66
  -7  -6  -5    4.39    1.71
   6 -13   5    0.33    2.21
 -13   7   5    0.41    1.95
  -7  -5  -5    0.50    1.78
  -7  -5  -5    3.41    1.73
  -7  -5  -5    8.88    2.58
  12  -7  -5    1.55    1.65
 -12   7   5    1.61    1.75
   5 -12   5    2.32    2.16
  11  -7  -5   16.98    2.22
  -7  -4  -5   16.99    2.55
  -7  -4  -5   11.86    2.56
  -7  -4  -5   12.50    2.13
   4 -11   5   12.93    2.65
 -11   7   5   15.27    2.23
  -7  -3  -5   11.22    1.95
  -7  -3  -5    7.89    2.12
  10  -7  -5    9.67    1.61
  -7  -3  -5    6.89    1.81
   7   3   5   13.16    1.77
   3 -10   5    8.62    2.28
  -7  -2  -5    2.53    1.44
  -2   9  -5    3.31    1.11
  -7  -2  -5    2.09    1.68
  -7  -2  -5    5.09    1.60
   9  -7  -5    4.28    1.20
   7   2   5    2.21    1.24
   2  -9   5    4.37    1.89
  -7  -1  -5    4.11    1.55
  -7  -1  -5    5.26    1.71
  -1   8  -5    4.73    1.23
   8  -7  -5    6.71    1.21
  -7  -1  -5    4.70    1.48
   1  -8   5    6.28    1.85
  -8   7   5    3.72    1.13
   7   1   5    5.06    1.31
   0   7  -5   27.53    2.21
  -7   0  -5   22.92    2.32
  -7   0  -5   27.48    2.65
  -7   0  -5   30.02    2.48
   7  -7  -5   27.61    1.99
   0  -7   5   28.70    2.91
  -7   7   5   24.84    1.80
   7   0   5   28.57    2.47
   0  -7   5   29.50    2.43
   1   6  -5   18.25    1.78
   6  -7  -5   18.09    1.42
  -7   1  -5   11.75    1.64
  -7   1  -5   14.71    1.77
  -7   1  -5   13.57    1.89
   7  -1   5   15.63    1.69
  -1  -6   5   15.91    2.17
  -1  -6   5   15.03    1.73
  -7   2  -5    2.95    1.15
   5  -7  -5    4.03    0.73
   2   5  -5    5.10    1.12
  -7   2  -5    3.30    1.22
  -2  -5   5    4.57    1.12
   7  -2   5    3.47    1.16
  -2  -5   5    3.87    1.42
  -7   3  -5   23.96    2.20
   4  -7  -5   26.08    1.46
   3   4  -5   23.60    2.09
   4  -7  -5   23.64    1.41
  -7   3  -5   25.53    2.26
   4  -7  -5   27.55    2.48
  -3  -4   5   23.29    2.38
   7  -3   5   23.57    2.19
  -3  -4   5   24.70    1.99
  -7   4  -5    9.14    1.52
   4   3  -5    9.08    1.29
   3  -7  -5    9.70    0.88
  -7   4  -5    8.62    1.49
   3  -7  -5   12.81    1.84
  -4  -3   5   10.76    1.26
  -4  -3   5    7.46    1.62
   7  -4   5    9.09    1.33
   5   2  -5    3.95    1.10
   2  -7  -5    3.24    0.54
   2  -7  -5    3.66    1.24
   2  -7  -5    6.03    1.58
  -5  -2   5    1.63    0.87
  -5  -2   5    3.62    1.45
   7  -5   5    2.50    1.09
   1  -7  -5   21.48    2.20
   6   1  -5   24.33    2.14
   1  -7  -5   19.95    1.30
   6   1  -5   18.56    1.50
   1  -7  -5   23.14    2.44
  -6  -1   5   17.53    2.22
  -6  -1   5   22.97    1.87
   7  -6   5   18.89    1.93
   7   0  -5    3.17    1.14
   7   0  -5    0.22    0.43
   0  -7  -5   -0.16    0.52
   0  -7  -5    2.33    1.53
   0  -7  -5    0.32    1.19
  -7   0   5    1.57    1.48
   7  -7   5    0.66    1.05
   0   7   5   -0.34    0.47
  -7   0   5    1.03    0.92
  -1  -7  -5    4.58    1.57
   8  -1  -5    5.26    1.32
  -1  -7  -5    5.35    1.79
   7  -8   5    6.38    1.38
   1   7   5    5.71    0.97
  -8   1   5    6.09    1.85
  -8   1   5    4.71    1.22
  -2  -7  -5    0.78    1.39
  -2  -7  -5    2.34    1.16
   9  -2  -5    1.79    1.28
  -2  -7  -5    1.33    1.77
   7  -9   5    3.49    1.38
  -9   2   5    2.05    1.20
  -9   2   5    0.57    1.62
  -3  -7  -5    8.66    1.69
  -3  -7  -5    6.24    2.16
  -3  -7  -5    9.41    1.91
  10  -3  -5    7.74    1.68
 -10   3   5    7.52    2.14
   7 -10   5    8.89    1.74
 -10   3   5    5.75    1.58
  11  -4  -5    0.30    1.39
  -4  -7  -5    3.08    1.64
  -4  -7  -5    1.97    1.99
 -11   4   5    0.48    1.51
   7 -11   5    4.15    1.70
  -5  -7  -5    0.46    1.59
  12  -5  -5   -0.95    1.49
  -5  -7  -5    2.86    2.29
   7 -12   5    2.44    1.69
   7 -12   5    1.72    2.20
 -12   5   5    0.27    1.57
  -6  -7  -5    6.22    2.81
  13  -6  -5   12.27    2.16
  -6  -7  -5    5.48    2.14
 -13   6   5    7.60    2.22
   7 -13   5    8.16    2.88
   7 -13   5   13.06    2.27
  -8  -5  -5    1.06    2.02
  -8  -5  -5    0.93    1.78
  13  -8  -5    2.07    1.76
  -8  -5  -5    7.16    2.68
   5 -13   5    3.03    2.36
 -13   8   5    3.15    2.06
  -8  -4  -5   -1.18    1.63
  -8  -4  -5    2.00    1.62
  -8  -4  -5   -1.87    1.91
  12  -8  -5   -1.00    1.44
   4 -12   5   -2.01    1.94
 -12   8   5   -1.48    1.61
  -8  -3  -5    2.89    2.09
  11  -8  -5    2.41    1.44
  -8  -3  -5    2.27    1.76
  -8  -3  -5    3.12    1.62
   3 -11   5    0.89    2.02
 -11   8   5    1.72    1.52
   8   3   5    3.62    1.52
  10  -8  -5    1.16    1.18
  -8  -2  -5    0.54    1.50
  -8  -2  -5    2.46    1.78
  -8  -2  -5   -0.97    1.47
   2 -10   5    0.91    1.80
   8   2   5    1.39    1.32
  -8  -1  -5   14.31    2.41
  -1   9  -5   13.14    1.72
   9  -8  -5   11.36    1.54
  -8  -1  -5   10.82    1.95
  -8  -1  -5   11.24    1.89
   8   1   5   13.65    1.90
   1  -9   5   15.71    2.58
  -8   0  -5   11.38    2.17
  -8   0  -5    9.27    1.75
   0   8  -5   12.42    1.68
   8  -8  -5   11.45    1.40
  -8   0  -5    9.20    1.74
   0  -8   5   14.29    1.91
   0  -8   5   11.65    2.23
   8   0   5   12.16    1.75
   7  -8  -5    2.58    0.88
  -8   1  -5    2.23    1.32
  -8   1  -5    3.10    1.33
   1   7  -5    4.07    1.24
  -8   1  -5    1.23    1.48
  -1  -7   5    2.28    1.22
  -1  -7   5   -0.24    1.56
   8  -1   5    1.49    1.24
   6  -8  -5   47.66    2.55
  -8   2  -5   50.49    3.31
  -8   2  -5   51.18    3.47
   2   6  -5   52.05    3.22
   6  -8  -5   51.35    2.64
  -8   2  -5   50.41    3.36
  -2  -6   5   53.36    3.91
   8  -2   5   56.23    3.52
  -2  -6   5   54.58    3.39
   5  -8  -5   21.55    1.42
  -8   3  -5   20.20    2.11
   5  -8  -5   23.18    1.51
   3   5  -5   23.19    2.11
  -8   3  -5   19.81    2.20
   8  -3   5   17.24    1.90
  -3  -5   5   21.20    2.47
  -3  -5   5   25.73    2.12
   4  -8  -5   15.10    1.18
  -8   4  -5   16.26    1.93
   4   4  -5   16.93    1.79
  -8   4  -5   13.97    1.83
   4  -8  -5   14.01    1.14
   4  -8  -5   14.04    2.05
  -4  -4   5   17.18    1.82
  -4  -4   5   15.75    2.17
   8  -4   5   15.65    1.84
  -8   5  -5   50.26    3.46
   3  -8  -5   53.28    3.72
  -8   5  -5   52.46    3.43
   5   3  -5   55.54    3.26
   3  -8  -5   48.03    2.43
  -5  -3   5   46.47    2.96
  -5  -3   5   49.19    3.46
   8  -5   5   50.79    3.26
   2  -8  -5    5.81    1.78
   2  -8  -5    7.72    1.61
   2  -8  -5    7.19    0.77
   6   2  -5    6.59    1.45
  -6  -2   5    6.14    1.28
  -6  -2   5    7.18    1.71
   8  -6   5    6.16    1.41
   1  -8  -5   28.96    2.94
   1  -8  -5   25.47    2.59
   1  -8  -5   26.65    1.64
   7   1  -5   25.38    2.26
  -7  -1   5   22.55    2.67
  -7  -1   5   22.88    2.13
   8  -7   5   26.68    2.42
   8   0  -5    5.45    1.46
   0  -8  -5    2.88    1.81
   0  -8  -5    1.96    1.42
  -8   0   5    3.21    1.20
   8  -8   5    8.05    1.57
  -8   0   5    7.57    1.91
  -1  -8  -5   13.03    2.41
   9  -1  -5   13.94    1.84
  -1  -8  -5   15.46    2.23
  -9   1   5   13.78    1.86
  -9   1   5   12.93    2.46
   8  -9   5   14.00    2.00
  10  -2  -5   27.27    2.62
  -2  -8  -5   30.42    3.03
  -2  -8  -5   31.51    3.40
 -10   2   5   28.00    3.32
   8 -10   5   34.61    3.13
 -10   2   5   36.20    2.92
  11  -3  -5   12.64    2.03
  -3  -8  -5   14.28    2.71
  -3  -8  -5    7.82    2.04
 -11   3   5   10.75    1.96
   8 -11   5   14.90    2.15
 -11   3   5    8.28    2.46
  -4  -8  -5   -0.12    2.13
  12  -4  -5    1.71    1.65
  -4  -8  -5    0.10    1.60
 -12   4   5    1.29    1.56
   8 -12   5   -1.48    1.61
 -12   4   5    0.39    1.91
  -5  -8  -5    1.21    2.54
  13  -5  -5    6.57    1.96
  -5  -8  -5    2.02    1.93
   8 -13   5    4.73    1.93
 -13   5   5    1.61    2.50
 -13   5   5    4.25    1.99
  12  -9  -5   -0.47    1.30
  -9  -3  -5    0.87    1.81
  -9  -3  -5    1.69    2.30
  -9  -3  -5    1.09    1.68
   3 -12   5    4.13    2.47
 -12   9   5   -0.48    1.80
  11  -9  -5    7.16    1.63
  -9  -2  -5    3.43    2.16
  -9  -2  -5    4.56    1.85
  -9  -2  -5    5.71    2.03
   2 -11   5   10.77    2.54
   9   2   5    9.25    1.80
  10  -9  -5    7.54    1.48
  -9  -1  -5    7.10    1.98
  -9  -1  -5    5.63    2.22
  -9  -1  -5    6.62    1.78
   1 -10   5    7.95    2.30
   9   1   5    6.11    1.59
   9  -9  -5   19.11    1.85
  -9   0  -5   18.55    2.73
  -9   0  -5   16.51    2.19
  -9   0  -5   16.50    2.35
   0   9  -5   16.96    1.99
   0  -9   5   22.72    2.94
   0  -9   5   19.51    2.35
   9   0   5   17.25    2.11
  -9   1  -5    7.04    1.95
   1   8  -5    9.89    1.58
   8  -9  -5   10.78    1.38
  -9   1  -5    9.57    1.78
  -9   1  -5   11.80    2.05
  -1  -8   5   13.49    2.42
  -1  -8   5    7.62    1.68
   9  -1   5    5.18    1.51
   2   7  -5   17.65    1.96
  -9   2  -5   14.08    1.95
  -9   2  -5   13.92    2.19
   7  -9  -5   16.34    1.47
  -9   2  -5   12.43    2.08
  -2  -7   5   14.29    1.91
  -2  -7   5   13.65    2.42
   9  -2   5   13.87    1.85
   3   6  -5   12.45    1.73
   6  -9  -5    9.63    1.12
  -9   3  -5   13.20    1.81
  -9   3  -5    9.49    1.76
   9  -3   5    9.09    1.72
  -3  -6   5   10.71    1.70
  -3  -6   5   12.71    2.29
  -9   4  -5    5.08    1.55
  -9   4  -5    3.71    1.43
   5  -9  -5    6.60    1.86
   4   5  -5    6.33    1.46
   5  -9  -5    4.97    0.84
  -4  -5   5    4.12    1.75
   9  -4   5    1.96    1.34
  -4  -5   5    3.54    1.23
   5   4  -5    1.03    1.23
  -9   5  -5    1.87    1.41
  -9   5  -5   -0.13    1.32
   4  -9  -5    1.77    0.67
   4  -9  -5    1.73    1.59
   4  -9  -5    0.57    0.63
   9  -5   5    0.68    1.26
  -5  -4   5    0.92    1.15
  -5  -4   5    0.92    1.57
  -9   6  -5    9.75    1.92
  -9   6  -5   12.28    1.99
   6   3  -5   13.24    1.84
   3  -9  -5   11.51    2.20
  -6  -3   5   10.61    2.14
  -6  -3   5   13.20    1.69
   9  -6   5    9.90    1.72
   7   2  -5   21.80    2.27
   2  -9  -5   17.25    2.41
   2  -9  -5   22.19    2.76
   9  -7   5   20.76    2.26
  -7  -2   5   21.86    2.83
  -7  -2   5   22.75    2.18
   8   1  -5   18.65    2.21
   1  -9  -5   14.93    2.55
   1  -9  -5   17.94    2.39
  -8  -1   5   16.33    2.52
  -8  -1   5   16.41    1.98
   9  -8   5   15.93    2.13
   0  -9  -5    6.86    2.12
   0  -9  -5    4.27    1.69
   9   0  -5    2.27    1.44
  -9   0   5    3.66    1.93
  -9   0   5    6.38    1.57
   9  -9   5    7.97    1.80
  -1  -9  -5   19.82    2.58
  -1  -9  -5   17.19    2.81
  10  -1  -5   17.36    2.22
   9 -10   5   20.02    2.36
 -10   1   5   17.70    2.82
 -10   1   5   18.50    2.32
  -2  -9  -5    7.19    2.15
  -2  -9  -5    9.12    2.58
  11  -2  -5    7.53    1.95
 -11   2   5    4.74    1.65
   9 -11   5   12.61    2.16
 -11   2   5    9.44    2.47
  12  -3  -5    5.97    1.95
  -3  -9  -5    2.87    2.42
  -3  -9  -5    3.90    1.96
   9 -12   5    7.60    2.04
 -12   3   5    4.20    1.81
 -12   3   5   -0.92    2.04
 -10  -2  -5    3.77    1.87
 -10  -2  -5    2.60    1.98
  12 -10  -5    1.33    1.48
 -10  -2  -5   -0.26    2.44
   2 -12   5    3.02    2.46
 -10  -1  -5    8.05    1.96
 -10  -1  -5    3.33    1.98
 -10  -1  -5    9.44    2.65
  11 -10  -5    6.09    1.55
   1 -11   5    7.24    2.47
  10   1   5    9.14    1.94
 -10   0  -5   11.45    2.02
 -10   0  -5   13.68    2.64
 -10   0  -5   13.45    2.41
  10 -10  -5   16.20    1.84
   0 -10   5    8.59    2.51
  10   0   5   11.71    1.93
 -10   1  -5    3.39    1.68
   9 -10  -5    3.33    1.20
 -10   1  -5    2.78    1.89
 -10   1  -5    5.24    1.61
  10  -1   5    6.22    1.71
  -1  -9   5    0.80    1.52
  -1  -9   5    2.62    2.02
 -10   2  -5    4.06    1.95
 -10   2  -5    1.53    1.55
   8 -10  -5   -0.56    0.91
   2   8  -5    0.57    1.20
 -10   2  -5    1.15    1.39
  -2  -8   5    1.71    1.35
  -2  -8   5   -1.88    1.81
  10  -2   5    0.84    1.30
   7 -10  -5   27.39    1.93
 -10   3  -5   24.47    2.91
 -10   3  -5   22.77    2.74
 -10   3  -5   25.81    2.56
   3   7  -5   27.20    2.54
  -3  -7   5   24.81    2.54
  10  -3   5   22.27    2.54
  -3  -7   5   26.10    3.24
   6 -10  -5   34.10    2.15
 -10   4  -5   37.76    3.27
   4   6  -5   36.66    2.97
 -10   4  -5   36.83    3.00
  -4  -6   5   34.65    3.00
  -4  -6   5   34.08    3.57
  10  -4   5   38.61    3.30
   5 -10  -5    2.88    1.80
   5 -10  -5    0.20    0.71
 -10   5  -5   -2.82    1.30
   5   5  -5    4.50    1.38
 -10   5  -5    0.45    1.54
  10  -5   5    2.95    1.50
  -5  -5   5    2.66    1.28
  -5  -5   5    0.60    1.63
 -10   6  -5    3.82    1.58
 -10   6  -5    5.45    1.69
   4 -10  -5    6.99    1.00
   6   4  -5    4.80    1.50
   4 -10  -5    7.10    2.02
  -6  -4   5    5.14    1.43
  -6  -4   5    7.50    2.16
  10  -6   5    6.83    1.68
   7   3  -5    6.46    1.59
   3 -10  -5    5.36    2.03
 -10   7  -5    4.38    1.83
 -10   7  -5    5.00    1.81
  -7  -3   5    0.34    1.67
  10  -7   5    3.80    1.51
  -7  -3   5    0.45    1.22
   8   2  -5    9.13    1.82
   2 -10  -5    5.55    2.16
   2 -10  -5    8.06    2.00
  10  -8   5    8.18    1.84
  -8  -2   5    7.10    2.27
  -8  -2   5    7.25    1.56
   9   1  -5    1.23    1.37
   1 -10  -5    2.91    1.73
   1 -10  -5   -0.81    1.83
  -9  -1   5   -0.46    1.27
  -9  -1   5    2.17    1.96
  10  -9   5   -0.34    1.48
  10   0  -5    0.50    1.46
   0 -10  -5   -0.29    1.93
   0 -10  -5    1.52    1.64
  10 -10   5    1.98    1.63
 -10   0   5   -0.79    1.26
 -10   0   5    0.26    1.96
  11  -1  -5    3.22    1.68
  -1 -10  -5    3.10    1.92
  -1 -10  -5    1.07    2.13
  10 -11   5    0.48    1.63
 -11   1   5    2.16    2.04
 -11   1   5   -0.14    1.48
  -2 -10  -5   -1.71    2.22
  12  -2  -5    0.46    1.76
  -2 -10  -5   -0.16    1.73
 -12   2   5   -2.36    1.97
 -12   2   5   -1.88    1.58
  10 -12   5   -0.28    1.74
 -11   0  -5    9.32    2.18
 -11   0  -5   12.21    2.88
 -11   0  -5   10.50    2.41
  11 -11  -5    9.87    1.71
   0 -11   5   11.57    2.98
  11   0   5   11.59    2.25
 -11   1  -5    3.24    1.70
  10 -11  -5    2.85    1.24
 -11   1  -5    1.70    2.06
 -11   1  -5    1.80    1.81
  -1 -10   5    3.11    1.73
  11  -1   5    2.33    1.63
  -1 -10   5    5.44    2.34
 -11   2  -5    0.98    1.81
 -11   2  -5    2.24    1.55
   9 -11  -5    1.13    1.06
 -11   2  -5    0.26    1.67
  11  -2   5    0.70    1.46
  -2  -9   5   -0.07    2.04
  -2  -9   5    1.81    1.56
 -11   3  -5    1.50    1.46
   8 -11  -5    2.36    0.97
 -11   3  -5    1.73    1.71
 -11   3  -5    3.35    2.04
  -3  -8   5    2.28    1.56
  -3  -8   5    3.25    2.25
  11  -3   5    2.31    1.59
   7 -11  -5   -0.42    0.80
   4   7  -5    1.05    1.31
 -11   4  -5    0.67    1.42
 -11   4  -5   -1.49    1.40
 -11   4  -5   -0.08    1.82
  11  -4   5    1.35    1.58
  -4  -7   5    0.09    1.35
  -4  -7   5    1.15    1.96
   5   6  -5    2.61    1.43
 -11   5  -5    3.07    1.53
 -11   5  -5    4.32    1.88
   6 -11  -5    4.38    0.90
  11  -5   5    1.11    1.57
  -5  -6   5    3.48    1.53
  -5  -6   5    5.90    2.16
 -11   6  -5    1.49    1.54
 -11   6  -5    1.67    1.80
   5 -11  -5    3.20    0.83
   6   5  -5    2.35    1.50
   5 -11  -5   -0.95    1.82
  11  -6   5    0.72    1.46
  -6  -5   5    2.09    1.41
  -6  -5   5    1.23    1.87
   4 -11  -5    6.53    1.03
   4 -11  -5    9.00    2.37
 -11   7  -5    6.76    1.97
 -11   7  -5    6.19    1.85
   7   4  -5    7.57    1.77
  11  -7   5    6.76    1.87
  -7  -4   5    7.57    1.67
  -7  -4   5    6.00    2.40
 -11   8  -5   -0.86    1.52
 -11   8  -5    0.02    1.82
   3 -11  -5    3.05    1.98
   8   3  -5    1.81    1.39
  11  -8   5    1.25    1.54
  -8  -3   5    0.11    1.94
  -8  -3   5   -3.14    1.20
   2 -11  -5    3.00    2.13
   2 -11  -5    1.39    1.82
   9   2  -5    6.69    1.89
  -9  -2   5    2.94    2.18
  -9  -2   5    1.19    1.42
  11  -9   5   -0.45    1.51
  10   1  -5    9.58    2.02
   1 -11  -5    6.23    2.20
   1 -11  -5    6.82    2.42
 -10  -1   5    5.56    2.34
 -10  -1   5    4.54    1.73
  11 -10   5    6.35    2.08
  11   0  -5    5.27    1.91
   0 -11  -5    0.58    2.22
   0 -11  -5   -0.29    1.69
 -11   0   5    2.24    2.26
 -11   0   5    2.13    1.71
  11 -11   5    1.47    1.89
  10 -12  -5    4.25    1.33
 -12   2  -5    6.04    2.35
 -12   2  -5    3.81    2.05
  12  -2   5    5.87    2.02
  -2 -10   5    1.68    1.74
  -2 -10   5    6.07    2.63
 -12   3  -5   11.98    2.14
 -12   3  -5    9.15    2.31
   9 -12  -5    9.20    1.36
 -12   3  -5    8.75    2.56
  12  -3   5   11.29    2.27
  -3  -9   5   12.37    2.29
  -3  -9   5   13.27    3.07
   8 -12  -5    1.65    0.92
 -12   4  -5   -0.70    1.38
 -12   4  -5    0.89    2.16
 -12   4  -5    0.90    1.83
  -4  -8   5    0.88    1.51
  -4  -8   5   -1.32    1.92
  12  -4   5    1.07    1.70
   7 -12  -5    0.83    0.90
 -12   5  -5   -0.19    1.77
 -12   5  -5    0.46    1.52
  12  -5   5    0.97    1.64
  -5  -7   5    0.43    1.44
  -5  -7   5    1.46    2.03
   6   6  -5    8.24    1.91
 -12   6  -5   12.30    2.00
   6 -12  -5    6.97    1.09
 -12   6  -5   12.52    2.48
   6 -12  -5    7.38    2.54
  -6  -6   5    7.85    2.57
  -6  -6   5    6.56    1.86
  12  -6   5    4.98    1.86
   7   5  -5   14.68    2.16
 -12   7  -5   19.10    2.44
   5 -12  -5   10.03    2.75
 -12   7  -5   11.33    2.51
   5 -12  -5   13.32    1.32
  -7  -5   5   13.64    2.17
  12  -7   5   10.98    2.23
  -7  -5   5   11.78    2.69
   4 -12  -5    4.40    2.18
   4 -12  -5    3.91    1.07
 -12   8  -5    2.31    2.11
   8   4  -5    7.27    1.86
 -12   8  -5    4.55    1.90
  -8  -4   5    6.43    1.84
  12  -8   5    1.14    1.86
  -8  -4   5    4.52    2.39
 -12   9  -5    1.31    2.16
 -12   9  -5    0.29    1.86
   3 -12  -5    3.70    2.39
   9   3  -5    2.51    1.65
  -9  -3   5   -1.14    2.08
  -9  -3   5    0.61    1.60
  12  -9   5    1.00    1.77
   2 -12  -5   11.38    2.92
  10   2  -5   10.48    2.24
 -12  10  -5   10.61    2.62
 -10  -2   5    8.48    2.02
  12 -10   5    6.24    2.11
 -10  -2   5   11.19    2.87
 -13   5  -5   -0.84    2.21
   8 -13  -5    2.08    1.17
 -13   5  -5   -0.85    1.95
  -5  -8   5    3.15    2.45
  -5  -8   5    2.32    1.72
  13  -5   5    0.23    1.74
 -13   6  -5    5.21    2.33
  -6  -7   5   10.62    2.16
  -6  -7   5   13.92    3.08
  13  -6   5    8.74    2.14
 -13   7  -5   17.83    3.14
   6 -13  -5   14.63    3.25
  -7  -6   5   14.25    3.06
  -7  -6   5   19.06    2.57
  13  -7   5   13.54    2.38
   8   5  -5   10.79    2.17
   5 -13  -5   11.09    3.05
 -13   8  -5   10.15    2.64
  13  -8   5   10.96    2.43
  -8  -5   5   12.93    3.09
  -8  -5   5   13.87    2.36
   0   0  -6   21.58    1.59
   0   0  -6   20.79    1.39
   0   0  -6   24.34    1.17
   0   0   6   25.39    1.21
   0   0   6   24.07    1.44
  -1   0  -6   41.58    2.08
  -1   0  -6   46.46    2.39
   0   1  -6   40.26    2.20
  -1   0  -6   40.62    2.11
   1  -1  -6   39.26    2.06
   1  -1  -6   40.82    1.88
   0   1  -6   45.05    2.06
   1  -1  -6   45.52    2.15
   0  -1   6   43.16    2.08
   1   0   6   40.74    2.13
   1   0   6   41.71    2.08
  -1   1   6   42.72    2.14
   1   0   6   45.23    2.21
  -1   1   6   44.26    1.89
  -1   1   6   42.49    2.03
  -1   1  -6   13.70    0.80
  -1   1  -6   11.03    1.00
   0  -1  -6   12.81    0.98
   0  -1  -6   11.40    0.95
   1   0  -6   12.50    1.14
   0  -1  -6   13.64    1.13
  -1   1  -6   11.80    0.93
   1  -1   6   13.88    0.79
   0   1   6   13.04    0.91
   0   1   6   16.96    1.25
  -1   0   6   13.23    1.07
  -1   0   6   11.56    1.05
   0   1   6   12.34    0.97
   0   1   6   12.57    0.94
   0   1   6   13.75    0.95
   2  -1  -6   10.36    0.80
  -1   2  -6    9.97    1.04
   2  -1  -6   10.54    0.91
  -1  -1  -6   10.23    1.11
  -1  -1  -6    8.22    0.78
  -1  -1  -6    8.89    0.95
  -1  -1  -6    9.47    0.85
  -1   2  -6   11.07    0.95
   1   1   6    8.36    1.01
   1  -2   6   10.24    1.01
  -2   1   6    9.81    0.81
  -2   1   6    8.58    0.59
   1   1   6    8.03    0.75
   1  -2   6    9.63    0.90
   1   1   6    7.72    0.76
   1   1   6    6.77    0.69
   1   1   6    9.02    0.83
  -1   3  -6   39.23    2.20
  -2  -1  -6   37.07    2.25
  -2  -1  -6   38.00    2.19
  -2  -1  -6   39.13    2.03
   3  -2  -6   36.16    1.90
  -1   3  -6   41.24    2.20
   3  -2  -6   38.12    1.70
  -2  -1  -6   32.18    1.99
  -3   2   6   34.49    1.79
   1  -3   6   38.02    2.15
   2   1   6   35.42    1.89
   2   1   6   38.44    1.94
   2   1   6   34.15    2.01
   0   2  -6    8.77    0.97
  -2   0  -6    4.88    0.99
   2  -2  -6    8.89    0.74
  -2   0  -6    6.57    0.82
  -2   0  -6    6.97    0.89
   2  -2  -6    5.98    0.64
   0   2  -6    6.29    0.83
   0   2  -6    7.98    0.77
  -2   0  -6    6.41    0.67
   0  -2   6    7.07    0.93
   2   0   6    5.74    0.74
  -2   2   6    7.46    0.60
  -2   2   6    6.79    0.68
   2   0   6    7.21    0.83
   2   0   6    6.74    0.85
  -2   2   6    8.85    0.79
   1  -2  -6    0.68    0.54
  -2   1  -6    0.93    0.83
  -2   1  -6    1.43    0.38
  -2   1  -6    0.96    0.64
   1  -2  -6    0.38    0.36
   1   1  -6    1.18    0.36
   1   1  -6    0.68    0.62
   1   1  -6    1.62    0.65
   1  -2  -6    1.18    0.60
  -1   2   6    0.64    0.50
  -1   2   6    0.65    0.55
   2  -1   6    1.00    0.69
  -1   2   6    0.27    0.54
  -1   2   6    0.39    0.31
  -1  -1   6   -0.43    0.32
   2  -1   6   -0.06    0.12
  -1  -1   6    1.65    0.67
   2   0  -6   24.26    1.59
   0  -2  -6   24.59    1.51
   0  -2  -6   21.97    1.54
   0  -2  -6   27.59    1.70
  -2   2  -6   22.86    1.60
  -2   2  -6   26.67    1.45
  -2   0   6   23.47    1.62
  -2   0   6   22.14    1.06
   0   2   6   24.04    1.15
   2  -2   6   23.28    1.35
   0   2   6   20.58    1.43
   0   2   6   20.81    1.16
   0   2   6   23.55    1.53
   0   2   6   22.71    1.40
   3  -1  -6   41.80    1.99
  -1  -2  -6   47.03    2.48
  -1  -2  -6   43.31    2.38
   3  -1  -6   46.20    2.34
  -1  -2  -6   41.95    2.15
  -2   3  -6   48.34    2.40
  -2   3  -6   48.06    2.51
  -1  -2  -6   42.80    2.42
   1   2   6   44.80    2.33
   1   2   6   40.19    2.28
   1   2   6   46.86    2.09
  -3   1   6   43.30    2.02
   1   2   6   45.26    2.43
   1   2   6   44.19    2.10
   2  -3   6   44.00    2.35
  -3   1   6   46.27    2.23
  -2  -2  -6   12.58    1.15
  -2  -2  -6   14.45    1.41
  -2   4  -6   13.37    1.29
  -2  -2  -6   14.23    1.36
   4  -2  -6   11.72    1.11
  -4   2   6   11.97    0.97
   2  -4   6   11.06    1.14
   2  -4   6   10.85    1.29
   2   2   6   10.55    0.93
  -3  -2  -6    6.43    1.16
  -3  -2  -6    8.14    0.93
  -3  -2  -6    7.57    1.19
   5  -3  -6    7.12    0.90
  -3  -2  -6    6.93    1.19
  -2   5  -6    6.84    1.07
   2  -5   6    6.83    1.07
   3   2   6    6.12    0.86
   2  -5   6    6.68    1.28
   3   2   6    6.25    1.05
  -3  -1  -6   23.78    1.85
   4  -3  -6   21.74    1.39
  -3  -1  -6   20.09    1.78
  -3  -1  -6   18.67    1.67
  -3  -1  -6   22.37    1.54
  -1   4  -6   21.61    1.66
  -1   4  -6   24.40    1.75
   3   1   6   17.66    1.49
   3   1   6   20.02    1.50
   1  -4   6   23.09    1.88
  -4   3   6   21.43    1.08
   1  -4   6   19.51    1.56
  -4   3   6   18.71    1.22
  -3   0  -6   37.91    2.39
  -3   0  -6   38.16    2.16
   3  -3  -6   40.50    1.90
  -3   0  -6   37.99    2.14
   0   3  -6   44.22    2.10
   3  -3  -6   40.69    1.91
   0   3  -6   41.83    2.26
   0   3  -6   30.68    2.15
  -3   0  -6   41.88    2.32
   3   0   6   38.39    2.11
   0  -3   6   38.30    2.20
  -3   3   6   34.99    1.95
  -3   3   6   36.33    1.74
   0  -3   6   39.17    2.37
   3   0   6   32.54    2.19
  -3   3   6   38.81    1.85
   3   0   6   38.78    2.14
  -3   1  -6   10.92    1.12
   1   2  -6   13.24    1.23
   1   2  -6   11.48    1.13
   2  -3  -6    9.07    0.73
   1   2  -6   11.37    0.92
  -3   1  -6    9.85    1.25
   2  -3  -6   10.86    0.95
  -3   1  -6    9.89    1.06
   2  -3  -6   10.07    0.99
  -2   3   6   11.72    0.99
  -2   3   6    7.63    0.99
  -1  -2   6   11.76    0.96
  -2   3   6    9.15    0.91
   3  -1   6    9.76    1.05
  -1  -2   6   10.73    1.28
  -1  -2   6   12.80    1.18
  -3   2  -6   56.05    2.85
   1  -3  -6   58.44    2.77
   1  -3  -6   53.62    2.83
  -3   2  -6   57.01    2.66
   2   1  -6   50.91    2.81
   1  -3  -6   53.16    2.77
   2   1  -6   58.16    2.52
   2   1  -6   59.60    2.93
  -1   3   6   54.91    2.74
  -2  -1   6   58.60    2.56
   3  -2   6   55.12    2.93
  -2  -1   6   59.16    2.80
  -1   3   6   56.18    2.76
  -2  -1   6   54.96    2.98
  -1   3   6   53.84    2.86
   3  -2   6   57.59    2.84
   0  -3  -6  108.53    5.05
  -3   3  -6  113.19    4.96
   0  -3  -6  112.63    4.68
   3   0  -6  110.73    4.71
   0  -3  -6  116.97    5.04
   0  -3  -6  109.11    5.08
   3   0  -6  107.42    4.98
   0   3   6  111.28    4.89
  -3   0   6  115.49    5.06
   3  -3   6  108.82    5.01
   0   3   6  100.71    4.87
   0   3   6  104.38    4.42
   0   3   6  102.97    4.44
   0   3   6  109.19    4.84
   3  -3   6  105.68    4.90
  -3   0   6  113.22    4.58
  -1  -3  -6  240.61   10.12
   4  -1  -6  244.29   10.31
  -1  -3  -6  242.29   10.42
  -1  -3  -6  255.21   10.50
  -3   4  -6  244.60   10.41
  -1  -3  -6  242.16   10.49
   3  -4   6  244.69   10.34
   3  -4   6  247.73   10.33
   1   3   6  243.65   10.54
   1   3   6  238.38    9.95
  -4   1   6  242.84   10.02
   1   3   6  236.64   10.33
  -3   5  -6   23.93    1.83
  -3   5  -6   23.98    2.10
  -2  -3  -6   23.28    1.48
  -2  -3  -6   23.00    1.98
  -2  -3  -6   20.13    1.82
  -2  -3  -6   23.52    1.98
   5  -2  -6   23.99    1.66
   3  -5   6   26.20    1.83
   3  -5   6   25.38    2.05
   2   3   6   21.93    1.82
  -5   2   6   25.93    1.62
   2   3   6   25.47    1.53
  -3  -3  -6   24.12    2.18
  -3   6  -6   26.20    1.92
  -3  -3  -6   23.38    2.05
  -3  -3  -6   22.23    1.60
  -3  -3  -6   22.02    2.05
   6  -3  -6   24.70    1.78
   3   3   6   25.35    1.70
  -6   3   6   22.62    1.74
   3  -6   6   26.27    2.19
   7  -4  -6   68.97    3.63
  -4  -3  -6   68.44    3.83
  -4  -3  -6   72.83    4.12
  -4  -3  -6   74.25    4.05
  -3   7  -6   67.87    3.74
  -7   4   6   68.74    3.67
   4   3   6   70.64    3.62
   3  -7   6   76.11    4.24
  -2   6  -6   11.02    1.33
  -4  -2  -6    7.28    1.01
   6  -4  -6   11.43    1.15
  -4  -2  -6   10.60    1.58
  -4  -2  -6    7.19    1.27
  -4  -2  -6    9.87    1.40
   4   2   6   10.48    1.14
   2  -6   6   10.88    1.62
  -4  -1  -6   47.50    2.88
  -4  -1  -6   48.03    2.91
  -1   5  -6   50.37    2.80
   5  -4  -6   51.43    2.53
  -4  -1  -6   49.28    2.93
   1  -5   6   54.71    3.00
  -5   4   6   52.74    2.39
   1  -5   6   55.31    3.26
   4   1   6   53.04    2.84
   0   4  -6   85.02    4.15
  -4   0  -6   87.55    4.26
   0   4  -6   89.69    4.05
  -4   0  -6   75.94    4.08
   4  -4  -6   88.67    3.80
  -4   0  -6   91.04    4.30
  -4   4   6   91.10    4.09
   4   0   6   97.42    4.47
   0  -4   6   95.89    4.76
   0  -4   6   97.30    4.54
  -4   4   6   97.86    4.41
  -4   4   6   93.91    4.12
  -4   1  -6   30.27    2.13
   3  -4  -6   27.75    1.62
   3  -4  -6   26.80    1.38
   1   3  -6   31.00    1.71
   1   3  -6   27.93    1.94
  -4   1  -6   28.32    2.03
   1   3  -6   26.25    1.99
  -1  -3   6   28.49    2.14
  -3   4   6   29.43    1.67
  -3   4   6   28.98    1.85
   4  -1   6   29.21    1.96
  -3   4   6   28.49    2.01
  -1  -3   6   31.79    2.00
  -1  -3   6   31.35    1.81
  -4   2  -6   37.15    2.28
  -4   2  -6   33.78    2.45
  -4   2  -6   37.53    2.21
   2  -4  -6   37.22    2.36
   2   2  -6   38.00    2.35
   2   2  -6   36.91    2.20
   2  -4  -6   36.30    2.06
   2  -4  -6   33.30    2.16
   2   2  -6   36.36    1.91
  -2  -2   6   38.22    2.41
  -2   4   6   33.78    2.19
  -2  -2   6   39.55    1.99
  -2   4   6   36.27    2.03
   4  -2   6   38.83    2.32
  -2   4   6   36.84    2.14
   1  -4  -6  110.88    5.21
   1  -4  -6  106.80    4.54
   1  -4  -6  109.04    5.11
   1  -4  -6  116.00    5.05
  -4   3  -6  109.83    4.97
   3   1  -6  114.45    4.81
  -1   4   6  106.91    5.16
  -1   4   6  110.93    4.99
  -3  -1   6  115.15    5.29
  -3  -1   6  108.22    4.82
   4  -3   6  113.93    5.18
  -1   4   6  110.46    5.04
   0  -4  -6  118.24    5.42
   0  -4  -6  116.36    5.48
   4   0  -6  115.71    5.39
   4   0  -6  120.90    5.14
   0  -4  -6  121.11    4.97
   4   0  -6  118.20    4.98
   0  -4  -6  116.32    5.55
   4  -4   6  126.14    5.56
  -4   0   6  120.78    5.64
   0   4   6  111.54    4.81
   0   4   6  121.15    4.82
  -4   0   6  117.84    5.10
   0   4   6  110.47    5.44
  -1  -4  -6   20.10    1.80
  -1  -4  -6   16.97    1.63
   5  -1  -6   18.80    1.59
  -1  -4  -6   19.89    1.22
  -1  -4  -6   19.43    1.87
   4  -5   6   18.53    1.71
   1   4   6   17.24    1.14
  -5   1   6   19.97    1.37
  -2  -4  -6    8.28    1.39
  -2  -4  -6    8.38    0.90
  -2  -4  -6    7.16    1.28
  -2  -4  -6    9.91    1.59
   6  -2  -6    9.54    1.17
   4  -6   6    8.61    1.40
  -6   2   6   10.05    1.11
   2   4   6    9.79    0.96
  -4   7  -6    1.99    0.92
  -3  -4  -6    0.63    1.02
   7  -3  -6    4.00    1.01
  -3  -4  -6    3.21    1.21
  -3  -4  -6    2.19    0.69
  -3  -4  -6    0.58    1.25
   4  -7   6    1.39    1.17
   3   4   6    2.32    0.79
  -7   3   6    1.11    0.90
   8  -4  -6    4.79    1.17
  -4  -4  -6    5.34    1.44
  -4  -4  -6    3.72    1.33
  -4  -4  -6    4.80    1.62
  -4   8  -6    3.83    1.12
  -8   4   6    6.88    1.29
   4  -8   6    5.15    1.62
   4   4   6    5.93    1.08
   9  -5  -6    8.22    1.47
  -5  -4  -6    7.28    1.64
  -5  -4  -6    8.87    1.99
  -5  -4  -6    3.99    1.52
  -4   9  -6    8.50    1.39
  -9   5   6    9.48    1.54
   5   4   6    7.83    1.35
   4  -9   6    7.95    2.00
  -5  -3  -6   51.40    3.53
  -5  -3  -6   56.39    3.56
   8  -5  -6   56.06    3.29
  -5  -3  -6   54.96    3.71
  -3   8  -6   60.75    3.38
   5   3   6   59.81    3.33
   3  -8   6   53.18    3.86
  -8   5   6   60.86    3.42
  -5  -2  -6   12.22    1.69
  -5  -2  -6   13.67    1.90
  -5  -2  -6   15.01    1.79
  -2   7  -6   14.84    1.58
  -5  -2  -6   12.41    1.66
   7  -5  -6   14.13    1.42
   5   2   6   15.07    1.52
   2  -7   6   11.38    1.84
  -5  -1  -6   -0.41    0.93
  -1   6  -6   -0.38    0.74
   6  -5  -6    1.08    0.73
  -5  -1  -6    1.37    1.18
  -5  -1  -6   -0.71    0.59
  -5  -1  -6    0.61    0.99
  -6   5   6   -0.20    0.43
   5   1   6    0.40    0.79
   1  -6   6    0.20    1.05
   0   5  -6   17.50    1.63
  -5   0  -6   17.70    1.75
  -5   0  -6   17.64    1.74
  -5   0  -6   16.52    1.77
  -5   0  -6   21.06    1.91
   5  -5  -6   20.26    1.34
   0  -5   6   18.66    1.66
  -5   5   6   17.89    1.23
   0  -5   6   18.19    2.04
   5   0   6   17.68    1.59
  -5   1  -6   33.61    2.24
   1   4  -6   34.32    2.25
   1   4  -6   33.31    2.02
  -5   1  -6   34.27    2.31
   4  -5  -6   32.62    1.68
  -5   1  -6   34.21    2.43
  -1  -4   6   32.88    2.05
  -1  -4   6   32.26    2.44
   5  -1   6   32.38    2.21
  -4   5   6   30.90    1.81
  -4   5   6   31.14    2.15
   3  -5  -6   28.97    1.33
  -5   2  -6   30.70    2.16
  -5   2  -6   27.11    2.16
   2   3  -6   28.73    2.04
  -2  -3   6   31.59    1.90
  -3   5   6   27.44    1.79
  -2  -3   6   32.79    2.35
   2  -5  -6    4.09    1.09
  -5   3  -6    6.24    1.29
  -5   3  -6    5.82    1.11
   2  -5  -6    4.85    1.01
   2  -5  -6    5.62    0.94
   3   2  -6    6.65    1.09
   3   2  -6    5.19    0.77
  -3  -2   6    5.42    1.27
  -3  -2   6    6.96    0.90
   5  -3   6    5.55    1.03
   4   1  -6    8.92    0.96
   1  -5  -6   12.80    1.32
   1  -5  -6   12.55    1.45
   4   1  -6   12.56    1.29
   4   1  -6   11.29    1.01
   1  -5  -6   11.75    0.71
  -5   4  -6   12.79    1.35
   1  -5  -6   11.82    1.56
  -4  -1   6   12.35    1.13
  -4  -1   6   12.82    1.61
   5  -4   6   10.97    1.39
   5   0  -6   52.98    2.95
   5   0  -6   52.48    2.49
   0  -5  -6   56.80    3.32
   0  -5  -6   54.71    2.47
   0  -5  -6   52.92    3.04
   0  -5  -6   56.25    3.18
  -5   0   6   54.08    2.70
   5  -5   6   53.62    3.09
  -5   0   6   52.91    3.32
   0   5   6   51.51    2.26
   6  -1  -6   36.17    1.69
  -1  -5  -6   34.77    2.54
  -1  -5  -6   34.28    2.42
  -1  -5  -6   36.81    2.68
   6  -1  -6   37.84    2.36
  -1  -5  -6   36.31    1.91
  -6   1   6   38.06    2.30
   5  -6   6   43.38    2.77
   1   5   6   37.77    2.00
  -6   1   6   43.33    2.99
  -2  -5  -6    9.40    1.48
   7  -2  -6   12.49    1.39
  -2  -5  -6   12.94    1.75
  -2  -5  -6   11.76    1.10
  -2  -5  -6   13.02    1.83
   2   5   6   12.39    1.15
   5  -7   6   13.46    1.82
  -7   2   6   13.80    1.43
  -3  -5  -6   38.06    2.92
  -3  -5  -6   32.15    2.16
  -3  -5  -6   38.95    3.23
  -3  -5  -6   36.58    2.70
   8  -3  -6   38.57    2.63
   3   5   6   37.24    2.34
  -8   3   6   39.99    2.65
   5  -8   6   42.58    3.26
  -4  -5  -6    6.69    1.62
  -4  -5  -6   13.11    2.02
  -4  -5  -6   11.47    2.11
   9  -4  -6   11.11    1.63
   4   5   6   12.21    1.42
   5  -9   6   10.14    1.98
  -9   4   6   13.34    1.74
  -5  -5  -6    6.46    1.94
  10  -5  -6   11.82    1.69
  -5  -5  -6    9.33    2.22
  -5  -5  -6   10.36    1.81
   5 -10   6   10.97    2.27
 -10   5   6    9.48    1.75
  -6  -5  -6    2.92    2.00
  -6  -5  -6    4.25    1.70
  11  -6  -6    4.00    1.54
  -6  -5  -6    0.34    1.64
 -11   6   6    2.18    1.62
   5 -11   6    1.62    1.90
  -6  -4  -6    1.64    1.76
  -6  -4  -6   -0.11    1.42
  10  -6  -6    0.50    1.22
  -6  -4  -6    1.55    1.46
  -4  10  -6    0.09    1.02
 -10   6   6   -1.28    1.28
   6   4   6    2.25    1.18
   4 -10   6    2.08    1.83
   9  -6  -6   22.87    2.10
  -6  -3  -6   21.99    2.52
  -6  -3  -6   23.29    2.49
  -3   9  -6   27.31    2.32
  -6  -3  -6   23.52    2.77
   6   3   6   21.68    2.08
  -9   6   6   23.27    2.22
   3  -9   6   26.86    2.93
  -6  -2  -6   36.80    2.88
  -6  -2  -6   30.39    2.87
  -6  -2  -6   33.35    3.08
  -2   8  -6   37.20    2.58
   8  -6  -6   34.67    2.45
  -8   6   6   34.77    1.73
   6   2   6   34.48    2.64
   2  -8   6   37.24    3.21
  -6  -1  -6    3.41    1.25
   7  -6  -6    1.57    0.86
  -1   7  -6    2.42    1.00
  -6  -1  -6    2.61    1.28
  -6  -1  -6    2.58    1.38
   1  -7   6    2.10    1.43
  -7   6   6    1.76    0.60
   6   1   6    1.05    1.01
   6  -6  -6    2.39    0.75
  -6   0  -6    2.43    1.17
  -6   0  -6    3.16    1.26
   0   6  -6    2.86    0.95
  -6   0  -6    3.71    1.23
  -6   6   6    2.21    0.67
   0  -6   6    3.22    1.08
   0  -6   6    2.91    1.41
   6   0   6    2.04    0.98
  -6   1  -6   14.85    1.73
  -6   1  -6   14.15    1.74
   1   5  -6   15.88    1.68
  -6   1  -6   14.93    1.73
   5  -6  -6   14.24    1.17
  -5   6   6   16.99    1.42
   6  -1   6   21.74    1.93
  -1  -5   6   14.96    1.59
  -1  -5   6   17.03    2.08
  -6   2  -6    0.05    0.93
   2   4  -6    1.72    0.95
   4  -6  -6    1.90    0.45
  -6   2  -6    1.69    1.05
  -4   6   6    0.63    1.01
  -2  -4   6    0.97    1.08
   6  -2   6    1.17    0.90
  -2  -4   6    2.60    0.88
   3  -6  -6    6.15    1.47
   3  -6  -6    6.11    0.47
   3  -6  -6    6.31    0.51
  -6   3  -6    7.85    1.43
  -6   3  -6    6.84    1.31
   3   3  -6    6.72    1.12
   3   3  -6    7.34    1.11
  -3  -3   6    6.40    1.47
  -3  -3   6    7.38    1.09
   6  -3   6    5.72    1.14
   2  -6  -6   21.25    2.02
   2  -6  -6   22.69    1.07
   4   2  -6   22.15    1.61
   4   2  -6   24.20    1.55
   2  -6  -6   24.56    2.22
   4   2  -6   26.13    1.92
  -6   4  -6   21.23    1.94
  -4  -2   6   25.19    2.32
   6  -4   6   27.02    2.20
  -4  -2   6   25.65    1.83
   5   1  -6   -0.35    0.51
   1  -6  -6    0.10    0.34
   1  -6  -6    0.60    1.15
   5   1  -6   -0.35    0.65
   1  -6  -6    1.81    1.04
   5   1  -6    0.45    0.88
   1  -6  -6   -1.03    0.84
  -5  -1   6    0.52    1.09
  -5  -1   6    0.33    0.71
   6  -5   6    0.33    0.92
   0  -6  -6   11.01    1.46
   6   0  -6    9.99    1.36
   0  -6  -6   10.13    1.56
   6   0  -6    7.22    0.81
   0  -6  -6   11.35    1.78
   0  -6  -6    9.81    0.83
  -6   0   6    9.28    1.74
   0   6   6    7.80    0.66
  -6   0   6    7.90    1.13
   6  -6   6   11.71    1.55
   7  -1  -6   20.93    1.25
  -1  -6  -6   20.30    2.34
   7  -1  -6   19.11    1.82
  -1  -6  -6   20.43    2.15
  -1  -6  -6   18.92    1.94
  -1  -6  -6   21.54    1.45
  -7   1   6   20.56    2.44
   6  -7   6   23.53    2.20
   1   6   6   24.82    1.51
  -7   1   6   24.68    1.92
   8  -2  -6    5.07    1.24
  -2  -6  -6    4.62    1.48
  -2  -6  -6    5.13    1.81
  -2  -6  -6    3.73    1.34
  -2  -6  -6    5.55    0.89
  -8   2   6    6.63    1.82
   2   6   6    9.36    1.08
  -8   2   6    6.73    1.30
   6  -8   6    7.30    1.48
  -3  -6  -6    2.18    1.46
  -3  -6  -6    1.75    1.29
   9  -3  -6    0.42    1.11
  -3  -6  -6    0.80    1.59
   6  -9   6   -0.05    1.49
  -9   3   6   -0.96    1.04
   6  -9   6   -0.51    1.22
  -4  -6  -6    8.46    2.16
  10  -4  -6    9.31    1.72
  -4  -6  -6    8.82    1.80
  -4  -6  -6    8.73    1.78
 -10   4   6    9.86    1.63
   6 -10   6   10.02    1.86
   6 -10   6    7.42    2.16
  11  -5  -6   21.83    2.43
  -5  -6  -6   20.62    2.50
  -5  -6  -6   18.49    2.65
  -5  -6  -6   21.49    3.12
 -11   5   6   19.83    2.32
   6 -11   6   17.14    2.82
  -6  -6  -6    4.61    1.73
  -6  -6  -6    4.39    1.84
  12  -6  -6    4.27    1.72
  -6  -6  -6    4.67    2.41
   6 -12   6    4.03    2.21
 -12   6   6    6.31    1.91
  -7  -6  -6   -0.33    1.80
  -7  -6  -6    1.62    1.69
  -7  -6  -6    1.48    2.32
  13  -7  -6   -0.07    1.53
   6 -13   6    0.36    2.25
 -13   7   6   -3.82    1.71
  -7  -5  -6    1.38    1.78
  12  -7  -6    0.45    1.47
  -7  -5  -6    0.28    1.61
  -7  -5  -6   -0.31    2.18
 -12   7   6    0.29    1.68
   5 -12   6   -0.72    2.00
  -7  -4  -6    5.28    1.80
  11  -7  -6   -0.18    1.37
  -7  -4  -6    2.38    2.02
  -7  -4  -6    3.10    1.62
   4 -11   6    4.17    2.15
 -11   7   6    0.49    1.50
  10  -7  -6    6.53    1.49
  -7  -3  -6    7.45    2.07
  -7  -3  -6    7.69    2.05
  -7  -3  -6    7.78    1.80
  -3  10  -6    6.01    1.72
   3 -10   6    2.94    1.93
 -10   7   6    5.23    1.54
   7   3   6    6.12    1.49
  -2   9  -6    9.02    1.50
  -7  -2  -6    6.96    1.75
  -7  -2  -6    7.28    1.65
  -7  -2  -6   11.17    2.14
   9  -7  -6    7.91    1.37
   2  -9   6    8.64    2.07
   7   2   6    4.76    1.34
   8  -7  -6    1.84    0.98
  -1   8  -6    3.77    1.14
  -7  -1  -6    1.90    1.40
  -7  -1  -6    1.03    1.37
  -7  -1  -6    2.94    1.61
   1  -8   6   -0.04    1.51
   7   1   6    1.56    1.18
   7  -7  -6   83.43    3.91
   0   7  -6   82.55    4.33
  -7   0  -6   78.13    4.47
  -7   0  -6   69.32    4.47
  -7   0  -6   84.10    4.51
  -7   7   6   74.67    3.74
   0  -7   6   80.04    4.33
   7   0   6   81.83    4.31
   0  -7   6   78.34    4.82
   1   6  -6   12.37    1.62
   6  -7  -6   11.84    1.15
  -7   1  -6   10.78    1.75
  -7   1  -6   13.53    1.75
  -7   1  -6   12.91    1.69
  -6   7   6   10.55    1.54
   7  -1   6   11.07    1.56
  -1  -6   6   12.95    1.59
  -1  -6   6   11.73    2.01
  -7   2  -6   16.85    1.86
  -7   2  -6   14.09    1.78
   2   5  -6   18.02    1.85
   5  -7  -6   15.45    1.20
  -2  -5   6   15.80    1.70
   7  -2   6   15.34    1.74
  -2  -5   6   15.44    2.13
   3   4  -6   66.11    3.64
   4  -7  -6   62.15    2.90
   4  -7  -6   64.30    3.93
  -7   3  -6   68.28    3.84
  -7   3  -6   72.11    3.89
   4  -7  -6   64.25    2.87
   7  -3   6   68.99    3.80
  -3  -4   6   62.73    3.53
  -3  -4   6   69.61    4.12
  -7   4  -6   18.57    2.04
   4   3  -6   24.29    2.13
   3  -7  -6   15.77    0.96
   3  -7  -6   17.69    2.05
   3  -7  -6   15.69    0.94
  -7   4  -6   18.03    1.94
  -4  -3   6   15.60    2.06
  -4  -3   6   20.31    1.74
   7  -4   6   14.36    1.63
   2  -7  -6   39.03    1.86
   2  -7  -6   45.28    2.93
   5   2  -6   42.91    2.79
   2  -7  -6   39.47    3.08
  -5  -2   6   41.61    2.53
   7  -5   6   40.30    2.92
  -5  -2   6   42.85    3.20
   1  -7  -6   11.76    1.95
   6   1  -6   14.93    1.71
   6   1  -6   13.95    1.25
   1  -7  -6   14.60    1.02
   1  -7  -6   12.39    1.81
  -6  -1   6   14.09    2.05
   7  -6   6   12.62    1.67
  -6  -1   6   13.64    1.46
   7   0  -6    9.49    0.96
   0  -7  -6    8.01    0.86
   0  -7  -6   10.44    1.94
   0  -7  -6    7.81    1.44
   7   0  -6   10.37    1.55
   0  -7  -6   10.07    1.69
   0   7   6    9.28    0.76
  -7   0   6   10.31    1.98
   7  -7   6    8.09    1.46
  -7   0   6    7.32    1.28
  -1  -7  -6   24.05    2.71
  -1  -7  -6   18.75    2.11
  -1  -7  -6   23.27    2.45
   8  -1  -6   27.47    2.35
  -8   1   6   25.84    2.21
  -8   1   6   29.63    3.01
   7  -8   6   27.39    2.59
  -2  -7  -6    3.26    1.35
   9  -2  -6    2.47    1.41
  -2  -7  -6    5.46    1.97
  -2  -7  -6    3.42    1.53
   7  -9   6    5.13    1.54
  -9   2   6    3.02    1.28
  -9   2   6    3.41    1.82
  -3  -7  -6   10.03    2.07
  10  -3  -6   13.67    1.96
  -3  -7  -6   12.35    1.95
  -3  -7  -6   11.16    2.37
 -10   3   6   13.17    1.87
 -10   3   6   12.63    2.42
   7 -10   6   16.12    2.21
  11  -4  -6   14.55    2.18
  -4  -7  -6   12.23    2.29
  -4  -7  -6   14.29    2.74
  -4  -7  -6   11.91    2.02
   7 -11   6   18.73    2.46
 -11   4   6   12.87    2.06
  -5  -7  -6    8.20    2.65
  12  -5  -6    5.86    1.79
  -5  -7  -6   11.25    2.31
  -5  -7  -6    9.32    1.97
 -12   5   6   13.71    2.24
   7 -12   6    7.32    2.50
   7 -12   6   16.29    2.36
  -6  -7  -6    5.28    2.73
  13  -6  -6    3.37    1.80
  -6  -7  -6    4.51    2.07
 -13   6   6    2.87    1.96
   7 -13   6    5.42    2.79
   7 -13   6    8.19    2.12
  -8  -4  -6    9.44    2.61
  12  -8  -6    9.71    1.95
  -8  -4  -6   11.15    2.41
  -8  -4  -6    9.80    2.15
 -12   8   6    5.74    1.94
   4 -12   6   10.95    2.66
  -8  -3  -6   17.35    2.44
  11  -8  -6   22.06    2.32
  -8  -3  -6   19.07    2.94
  -8  -3  -6   18.99    2.72
 -11   8   6   21.68    2.54
   3 -11   6   25.20    3.30
  10  -8  -6   11.08    1.61
  -8  -2  -6    8.13    1.95
  -8  -2  -6   12.01    2.42
  -8  -2  -6   13.56    2.22
   2 -10   6   11.19    2.49
   8   2   6   10.43    1.80
  -1   9  -6   18.99    2.03
   9  -8  -6   13.29    1.64
  -8  -1  -6   14.23    2.11
  -8  -1  -6   14.84    2.21
  -8  -1  -6   17.07    2.61
   1  -9   6   14.87    2.58
   8   1   6   13.10    1.89
  -8   0  -6   32.16    3.02
  -8   0  -6   25.97    2.65
  -8   0  -6   24.65    2.50
   0   8  -6   31.09    2.55
   8  -8  -6   26.72    2.13
   8   0   6   30.74    2.77
   0  -8   6   32.01    3.26
   7  -8  -6   23.83    1.81
   1   7  -6   27.50    2.36
  -8   1  -6   27.24    2.42
  -8   1  -6   19.44    2.47
  -8   1  -6   19.04    2.22
   8  -1   6   30.53    2.70
  -1  -7   6   33.13    3.28
  -1  -7   6   26.65    2.54
   2   6  -6    1.17    1.11
  -8   2  -6    0.53    1.23
  -8   2  -6    0.71    1.29
   6  -8  -6    0.66    0.68
  -8   2  -6    1.23    1.39
  -2  -6   6   -0.16    1.02
   8  -2   6   -0.30    1.17
  -2  -6   6    1.01    1.52
   5  -8  -6    6.72    0.75
   5  -8  -6    4.16    0.69
   3   5  -6    6.11    1.39
  -8   3  -6    6.17    1.66
  -8   3  -6    7.45    1.50
   8  -3   6    2.76    1.27
  -3  -5   6    6.30    1.27
  -3  -5   6    5.15    1.63
  -8   4  -6   16.43    2.02
   4  -8  -6   15.22    1.06
   4  -8  -6   15.84    1.08
   4   4  -6   21.08    2.07
  -8   4  -6   14.79    1.93
   4  -8  -6   17.17    2.30
  -4  -4   6   14.22    2.10
  -4  -4   6   16.51    1.74
   8  -4   6   12.23    1.72
   3  -8  -6   13.53    2.12
   3  -8  -6   10.37    0.86
  -8   5  -6   14.27    1.99
  -8   5  -6   15.40    1.97
   5   3  -6   14.01    1.81
   8  -5   6   12.67    1.79
  -5  -3   6    8.79    1.91
  -5  -3   6   13.55    1.55
   2  -8  -6   11.71    1.89
   2  -8  -6   14.22    2.17
   6   2  -6    9.31    1.52
   2  -8  -6    9.38    0.80
   8  -6   6   10.83    1.72
  -6  -2   6   11.86    1.49
  -6  -2   6   11.36    2.07
   7   1  -6   12.59    1.74
   1  -8  -6   10.52    2.07
   1  -8  -6    9.61    0.99
   1  -8  -6    9.38    1.77
  -7  -1   6    7.47    1.90
   8  -7   6   12.21    1.87
  -7  -1   6   11.35    1.53
   8   0  -6   43.34    3.19
   0  -8  -6   44.79    3.50
   0  -8  -6   47.74    3.87
   8  -8   6   52.17    3.51
  -8   0   6   46.33    3.84
  -8   0   6   46.07    3.09
  -1  -8  -6   26.60    3.08
  -1  -8  -6   25.49    2.73
   9  -1  -6   24.28    2.53
  -9   1   6   27.46    2.42
  -9   1   6   28.51    3.15
   8  -9   6   25.04    2.57
  -2  -8  -6    3.54    2.07
  10  -2  -6    4.80    1.53
  -2  -8  -6    0.20    1.53
 -10   2   6    4.10    1.97
   8 -10   6    8.13    1.76
 -10   2   6    4.61    1.45
  -3  -8  -6    5.94    1.91
  -3  -8  -6   11.75    2.60
  11  -3  -6   11.01    2.04
 -11   3   6    7.77    1.82
 -11   3   6   11.98    2.62
   8 -11   6    9.53    2.00
  -4  -8  -6    5.27    2.47
  -4  -8  -6    8.31    2.10
  12  -4  -6    7.99    2.10
   8 -12   6    5.23    1.95
 -12   4   6    6.03    2.41
 -12   4   6    8.64    1.96
  12  -9  -6    4.66    1.62
  -9  -3  -6    6.60    2.04
  -9  -3  -6    8.24    2.58
  -9  -3  -6    4.41    2.10
 -12   9   6    5.92    2.00
   3 -12   6    4.24    2.33
  11  -9  -6   11.41    1.73
  -9  -2  -6    7.75    2.04
  -9  -2  -6    8.79    2.29
  -9  -2  -6    7.54    2.53
   9   2   6    9.52    2.04
   2 -11   6    9.80    2.55
  -9  -1  -6    6.08    1.98
  10  -9  -6    6.85    1.45
  -9  -1  -6    9.34    2.34
  -9  -1  -6    6.11    1.79
   9   1   6   11.27    1.95
   1 -10   6    9.26    2.43
  -9   0  -6    0.39    1.70
  -9   0  -6   -1.07    1.38
   9  -9  -6    1.38    1.03
  -9   0  -6    0.42    1.42
   0   9  -6    0.08    1.15
   0  -9   6    4.35    1.99
   9   0   6    1.90    1.48
  -9   1  -6   12.86    1.96
  -9   1  -6   10.06    1.97
   1   8  -6   11.50    1.76
   8  -9  -6   10.57    1.34
  -9   1  -6    7.98    2.09
  -1  -8   6   10.46    1.82
  -1  -8   6   11.03    2.35
   9  -1   6    8.75    1.80
  -9   2  -6   15.44    2.08
   7  -9  -6   14.91    1.36
  -9   2  -6   12.41    2.27
   2   7  -6   17.47    1.99
  -9   2  -6   12.29    1.98
  -2  -7   6   13.00    2.36
   9  -2   6   13.22    1.94
  -2  -7   6   14.05    1.89
   3   6  -6    4.15    1.31
  -9   3  -6    1.99    1.42
   6  -9  -6    2.71    0.74
  -9   3  -6    0.72    1.33
   9  -3   6    3.60    1.44
  -3  -6   6    4.31    1.35
  -3  -6   6    4.73    1.89
  -9   4  -6   17.40    2.20
   5  -9  -6   18.49    1.31
  -9   4  -6   17.62    2.16
   4   5  -6   19.16    2.12
  -4  -5   6   17.01    1.90
   9  -4   6   12.88    1.88
  -4  -5   6   21.00    2.58
   4  -9  -6    7.45    0.78
  -9   5  -6    8.65    1.85
   5   4  -6    8.70    1.63
  -9   5  -6    7.45    1.68
   4  -9  -6    8.25    1.96
   4  -9  -6    7.82    0.79
   9  -5   6    6.57    1.60
  -5  -4   6    6.71    1.38
  -5  -4   6    8.87    2.05
  -9   6  -6    4.15    1.76
   3  -9  -6    5.81    1.81
   6   3  -6    5.41    1.44
  -9   6  -6    3.60    1.56
  -6  -3   6    5.11    1.25
   9  -6   6    4.49    1.44
  -6  -3   6    3.95    1.80
   2  -9  -6    2.00    1.75
   7   2  -6    1.39    1.29
   2  -9  -6    2.05    1.53
  -7  -2   6    2.20    1.06
  -7  -2   6    0.56    1.59
   9  -7   6    1.12    1.33
   1  -9  -6    1.15    1.46
   8   1  -6    0.94    1.33
   1  -9  -6    0.12    1.65
   9  -8   6    0.88    1.37
  -8  -1   6    0.46    1.05
  -8  -1   6    0.67    1.64
   0  -9  -6    6.93    2.21
   0  -9  -6    7.27    1.99
   9   0  -6    5.03    1.67
   9  -9   6    3.15    1.56
  -9   0   6    3.49    1.37
  -9   0   6    4.22    1.89
  10  -1  -6   -0.30    1.39
  -1  -9  -6    0.46    1.58
  -1  -9  -6    0.18    1.86
 -10   1   6   -0.94    1.79
   9 -10   6    2.04    1.56
 -10   1   6   -0.96    1.25
  -2  -9  -6   -1.02    2.05
  -2  -9  -6    0.69    1.68
  11  -2  -6   -1.37    1.55
 -11   2   6   -0.58    1.35
   9 -11   6   -0.49    1.53
 -11   2   6    2.57    2.10
  -3  -9  -6    3.80    1.91
  12  -3  -6    1.22    1.67
  -3  -9  -6    3.32    2.26
 -12   3   6    2.69    2.31
   9 -12   6    4.10    1.90
 -12   3   6    2.86    1.65
  12 -10  -6    2.60    1.48
 -10  -2  -6    0.31    1.88
 -10  -2  -6    3.69    2.44
 -10  -2  -6    0.39    1.97
   2 -12   6    1.69    2.35
  11 -10  -6    0.65    1.29
 -10  -1  -6    3.76    2.07
 -10  -1  -6   -1.91    1.67
 -10  -1  -6    1.19    1.80
  10   1   6    4.23    1.74
   1 -11   6    0.36    2.15
 -10   0  -6   -1.00    1.98
 -10   0  -6   -1.09    1.53
  10 -10  -6   -0.34    1.07
 -10   0  -6    1.94    1.66
  10   0   6    1.96    1.64
   0 -10   6   -0.23    2.02
 -10   1  -6    3.74    1.82
 -10   1  -6    7.40    1.87
 -10   1  -6    5.54    1.99
   9 -10  -6    5.48    1.23
  10  -1   6    6.08    1.75
  -1  -9   6    8.41    1.87
  -1  -9   6    5.42    2.28
 -10   2  -6    2.98    1.60
   2   8  -6    2.60    1.35
 -10   2  -6    1.08    1.82
   8 -10  -6    3.35    0.96
 -10   2  -6    0.32    1.46
  -2  -8   6    0.69    1.34
  10  -2   6    1.84    1.52
  -2  -8   6    3.30    2.13
 -10   3  -6    7.73    1.89
   3   7  -6    8.26    1.69
   7 -10  -6    5.89    0.98
 -10   3  -6    5.43    1.97
 -10   3  -6    5.41    1.72
  -3  -7   6    9.70    2.40
  -3  -7   6    5.78    1.61
  10  -3   6    4.84    1.63
 -10   4  -6    5.54    1.78
   4   6  -6    3.83    1.47
 -10   4  -6    4.28    1.55
   6 -10  -6    4.54    0.82
  -4  -6   6    1.90    1.89
  10  -4   6    5.13    1.58
  -4  -6   6    6.79    1.56
 -10   5  -6    8.37    1.96
 -10   5  -6   10.29    1.91
   5   5  -6   10.79    1.82
   5 -10  -6    8.29    2.25
   5 -10  -6    9.65    0.94
  -5  -5   6   11.19    2.31
  -5  -5   6    6.93    1.52
  10  -5   6    9.56    1.82
   4 -10  -6    0.20    1.70
 -10   6  -6    0.54    1.60
   6   4  -6    1.62    1.32
   4 -10  -6    1.53    0.64
 -10   6  -6    1.00    1.56
  -6  -4   6    2.95    1.24
  -6  -4   6    0.98    1.89
  10  -6   6   -0.08    1.39
 -10   7  -6    5.34    1.85
   7   3  -6    3.36    1.42
   3 -10  -6    5.72    2.03
 -10   7  -6    5.71    1.84
  10  -7   6    5.56    1.71
  -7  -3   6    3.96    1.86
  -7  -3   6    3.43    1.32
   2 -10  -6   10.00    2.09
   8   2  -6   10.60    1.90
   2 -10  -6    8.98    2.31
  -8  -2   6   12.12    1.79
  10  -8   6    8.12    1.92
  -8  -2   6   17.12    2.77
   1 -10  -6   -0.27    1.75
   9   1  -6    2.23    1.55
   1 -10  -6    0.51    1.59
  -9  -1   6    2.18    1.38
  -9  -1   6    2.22    1.97
  10  -9   6    1.77    1.66
   0 -10  -6    0.38    1.71
  10   0  -6    2.86    1.70
   0 -10  -6    2.58    2.03
 -10   0   6    1.28    1.33
 -10   0   6    1.30    2.07
  10 -10   6   -1.32    1.49
  -1 -10  -6    9.25    2.33
  -1 -10  -6    9.08    2.63
  11  -1  -6   10.18    2.13
 -11   1   6   11.37    2.05
 -11   1   6    9.02    2.50
  10 -11   6   12.90    2.35
  -2 -10  -6   10.37    2.53
  -2 -10  -6    8.72    2.73
  12  -2  -6    9.51    2.13
 -12   2   6    4.83    2.01
 -12   2   6    7.25    2.64
  10 -12   6    7.32    2.22
 -11   0  -6    5.56    2.06
  11 -11  -6   11.18    1.76
 -11   0  -6    7.05    2.27
 -11   0  -6   11.30    2.70
   0 -11   6   13.69    3.13
  11   0   6    8.39    2.20
 -11   1  -6    7.09    2.45
 -11   1  -6    8.50    2.28
  10 -11  -6    6.80    1.35
 -11   1  -6    8.15    1.99
  -1 -10   6    7.39    2.56
  -1 -10   6    6.44    1.96
  11  -1   6    7.07    1.93
 -11   2  -6    3.46    1.84
 -11   2  -6    3.29    1.66
   9 -11  -6    2.90    1.07
 -11   2  -6   -0.95    1.88
  11  -2   6    2.68    1.62
  -2  -9   6    4.72    2.36
  -2  -9   6    2.97    1.69
 -11   3  -6    6.88    2.25
   3   8  -6    6.93    1.83
 -11   3  -6    6.19    1.80
   8 -11  -6    4.95    1.05
 -11   3  -6    5.77    1.96
  -3  -8   6    7.03    1.78
  11  -3   6    7.58    1.82
  -3  -8   6    5.75    2.44
 -11   4  -6   12.89    2.31
   4   7  -6   15.93    2.14
 -11   4  -6   15.17    2.12
 -11   4  -6   14.30    2.48
   7 -11  -6   12.51    1.26
  -4  -7   6   12.60    2.71
  -4  -7   6   16.32    2.18
  11  -4   6   13.54    2.17
 -11   5  -6    6.86    1.81
   6 -11  -6    7.24    0.96
   5   6  -6    7.64    1.71
 -11   5  -6    3.75    1.88
  -5  -6   6    7.25    2.32
  11  -5   6    4.15    1.72
  -5  -6   6    5.77    1.60
   6   5  -6    1.34    1.41
 -11   6  -6    2.91    1.92
   5 -11  -6    2.63    0.72
   5 -11  -6    3.34    2.05
 -11   6  -6    5.33    1.78
  -6  -5   6    1.18    1.31
  -6  -5   6    5.85    2.13
  11  -6   6    1.27    1.46
   4 -11  -6    6.09    2.18
   7   4  -6    7.63    1.82
   4 -11  -6    7.66    0.94
 -11   7  -6   10.94    2.20
 -11   7  -6    9.73    2.27
  11  -7   6    3.38    1.66
  -7  -4   6    9.75    1.78
  -7  -4   6    6.60    2.39
 -11   8  -6   23.63    2.84
   8   3  -6   24.60    2.64
   3 -11  -6   16.58    2.91
 -11   8  -6   21.62    2.91
  -8  -3   6   20.56    2.35
  -8  -3   6   24.39    3.31
  11  -8   6   19.73    2.44
   2 -11  -6    2.88    1.93
   9   2  -6    6.57    1.94
   2 -11  -6    7.88    2.43
  11  -9   6    7.56    2.04
  -9  -2   6    8.71    1.85
  -9  -2   6   11.33    2.68
   1 -11  -6    0.89    2.03
  10   1  -6    0.97    1.70
   1 -11  -6   -2.60    1.65
 -10  -1   6   -0.49    1.39
  11 -10   6    3.67    1.85
 -10  -1   6   -0.07    2.14
   0 -11  -6    9.46    2.78
   0 -11  -6   13.13    2.66
  11   0  -6   12.39    2.25
 -11   0   6    9.38    2.85
  11 -11   6   11.65    2.35
 -11   0   6   10.08    2.12
 -12   2  -6    7.74    2.42
 -12   2  -6    3.72    1.92
  10 -12  -6    8.93    1.42
 -12   2  -6    7.38    2.31
  -2 -10   6   10.78    2.17
  -2 -10   6    7.18    2.71
  12  -2   6    5.31    1.89
   9 -12  -6    0.23    0.94
 -12   3  -6    0.85    1.84
 -12   3  -6    0.59    1.64
 -12   3  -6    3.29    2.10
  -3  -9   6   -0.20    1.50
  12  -3   6    0.84    1.62
  -3  -9   6    1.70    2.22
 -12   4  -6   12.70    2.46
 -12   4  -6    9.06    2.01
 -12   4  -6    8.60    2.52
   8 -12  -6   10.56    1.26
  -4  -8   6   10.56    2.13
  12  -4   6   11.48    2.24
  -4  -8   6   11.65    3.01
   5   7  -6   21.78    2.62
 -12   5  -6   19.46    2.42
 -12   5  -6   22.03    2.88
   7 -12  -6   19.03    1.64
  12  -5   6   17.85    2.50
  -5  -7   6   18.02    3.20
  -5  -7   6   24.89    2.70
 -12   6  -6   17.14    2.39
   6   6  -6   15.37    2.27
 -12   6  -6   15.42    2.62
  12  -6   6   12.49    2.20
  -6  -6   6   17.98    2.40
  -6  -6   6   19.46    3.16
   7   5  -6    6.37    1.82
 -12   7  -6    6.59    2.31
   5 -12  -6    7.44    2.49
 -12   7  -6    2.78    1.81
  -7  -5   6    0.03    1.97
  12  -7   6    6.00    2.01
  -7  -5   6    4.16    1.66
   4 -12  -6    8.66    2.52
   8   4  -6    6.96    1.87
 -12   8  -6    7.38    2.41
 -12   8  -6   10.84    2.34
  12  -8   6    9.09    2.26
  -8  -4   6    6.95    2.63
  -8  -4   6    7.21    1.79
   9   3  -6   14.53    2.31
 -12   9  -6    9.45    2.56
   3 -12  -6   10.55    2.76
 -12   9  -6   11.32    2.48
  12  -9   6   10.68    2.23
  -9  -3   6   11.84    2.10
  -9  -3   6   11.87    2.88
 -12  10  -6   -2.53    2.00
 -12  10  -6    2.67    2.27
  10   2  -6    0.70    1.60
   2 -12  -6   -0.95    2.15
  12 -10   6   -0.70    1.64
 -10  -2   6   -0.63    1.53
 -10  -2   6   -1.28    2.12
 -13   6  -6   -1.80    1.99
  13  -6   6    1.70    1.98
  -6  -7   6   -2.55    1.53
  -6  -7   6    0.21    2.26
 -13   7  -6    1.09    2.25
  -7  -6   6    1.43    1.67
  -7  -6   6   -2.87    2.05
  13  -7   6   -0.63    1.86
   0   0  -7    0.58    0.53
   0   0  -7    1.43    0.75
   0   0  -7    0.32    0.37
   0   0   7   -0.33    0.46
   0   0   7    0.86    0.35
   1  -1  -7   48.83    2.16
  -1   0  -7   48.70    2.35
  -1   0  -7   48.58    2.43
   0   1  -7   48.23    2.52
   1  -1  -7   50.43    2.45
  -1   0  -7   47.98    2.63
   0   1  -7   50.69    2.33
   1  -1  -7   47.66    2.38
  -1   1   7   49.52    2.11
   1   0   7   49.66    2.46
   0  -1   7   50.27    2.31
   1   0   7   45.88    2.38
  -1   1   7   48.30    2.30
   1   0   7   47.11    2.30
   0  -1  -7   41.34    2.19
   1   0  -7   45.60    2.35
  -1   1  -7   43.27    2.35
  -1   1  -7   47.07    1.98
   0  -1  -7   44.66    2.16
  -1   1  -7   45.49    2.18
   0  -1  -7   47.44    2.41
   0   1   7   41.09    1.98
   1  -1   7   44.34    1.89
   0   1   7   43.53    2.03
   0   1   7   40.12    2.08
  -1   0   7   43.04    2.12
   0   1   7   50.56    2.35
  -1   0   7   39.34    2.18
   2  -1  -7   41.66    2.04
  -1  -1  -7   38.69    2.12
  -1   2  -7   39.32    2.23
  -1   2  -7   44.17    2.06
  -1  -1  -7   37.24    1.88
  -1  -1  -7   41.76    2.31
   2  -1  -7   37.20    2.07
   1   1   7   39.25    2.01
   1   1   7   40.32    2.28
   1   1   7   39.30    2.02
   1   1   7   41.44    2.03
   1   1   7   36.50    1.87
   1  -2   7   43.36    2.08
  -2   1   7   40.51    2.01
  -2  -1  -7    2.63    0.81
   3  -2  -7    1.73    0.44
  -2  -1  -7    1.76    0.86
   3  -2  -7    2.49    0.63
  -2  -1  -7    2.48    0.67
  -1   3  -7    2.53    0.75
  -1   3  -7    2.35    0.82
  -2  -1  -7    1.98    0.65
   2   1   7    1.90    0.57
   1  -3   7    2.07    0.72
   1  -3   7    2.73    0.81
  -3   2   7    2.14    0.50
   2   1   7    2.52    0.60
  -3   2   7    1.63    0.51
   2   1   7    1.96    0.70
   2   1   7    1.78    0.60
   0   2  -7    7.44    0.97
  -2   0  -7    6.96    1.07
   0   2  -7    4.83    0.81
   2  -2  -7    7.58    0.74
   2  -2  -7    7.42    0.78
  -2   0  -7    5.25    0.62
   0   2  -7    8.94    0.77
  -2   0  -7    5.10    0.87
   2   0   7    8.23    0.94
   2   0   7    6.91    0.88
   0  -2   7    7.13    0.96
   2   0   7    7.97    0.85
   2   0   7    7.95    1.04
  -2   2   7    7.21    0.66
  -2   2   7    7.69    0.72
  -2   2   7    8.30    0.87
   0  -2   7    8.96    1.04
  -2   1  -7  131.79    5.35
  -2   1  -7  127.26    5.85
   1  -2  -7  138.96    5.65
   1  -2  -7  125.75    5.52
   1  -2  -7  119.83    5.46
   1   1  -7  129.91    5.34
  -2   1  -7  127.97    5.63
   1   1  -7  134.74    5.66
   1   1  -7  129.42    5.73
  -1   2   7  130.81    5.42
  -1   2   7  134.35    5.58
   2  -1   7  129.55    5.68
  -1  -1   7  134.96    5.64
  -1   2   7  118.17    5.31
  -1   2   7  121.03    5.50
  -2   2  -7   69.39    3.48
   2   0  -7   72.54    3.43
  -2   2  -7   76.74    3.26
   0  -2  -7   70.06    3.36
   0  -2  -7   70.30    3.30
   0  -2  -7   74.05    3.50
  -2   0   7   72.43    3.21
   0   2   7   68.76    3.14
   0   2   7   63.13    3.12
   0   2   7   70.58    3.28
   2  -2   7   68.69    3.29
  -2   0   7   69.07    3.31
   0   2   7   69.99    2.96
   0   2   7   62.14    2.96
  -1  -2  -7   26.09    1.73
  -2   3  -7   29.96    1.75
   3  -1  -7   25.76    1.44
  -1  -2  -7   27.67    1.87
  -1  -2  -7   29.74    1.94
  -1  -2  -7   26.75    1.58
   3  -1  -7   27.54    1.73
  -2   3  -7   26.90    1.88
   2  -3   7   28.28    1.70
   1   2   7   26.80    1.83
   1   2   7   24.65    1.46
   2  -3   7   25.68    1.73
  -3   1   7   25.75    1.27
   1   2   7   24.67    1.61
  -3   1   7   27.04    1.57
   1   2   7   26.53    1.44
   1   2   7   26.87    1.66
  -2  -2  -7   27.78    1.69
  -2   4  -7   30.80    1.96
   4  -2  -7   28.36    1.73
  -2  -2  -7   25.09    1.88
  -2  -2  -7   28.36    2.06
  -2  -2  -7   28.48    2.02
   2   2   7   23.56    1.67
  -4   2   7   24.92    1.45
   2  -4   7   32.28    2.49
   2   2   7   25.80    1.57
   2  -4   7   27.78    1.93
  -3  -2  -7   77.73    3.90
  -3  -2  -7   74.62    3.57
   5  -3  -7   74.26    3.53
  -2   5  -7   77.39    3.79
  -3  -2  -7   78.08    3.90
  -3  -2  -7   64.56    3.71
   3   2   7   69.98    3.72
   3   2   7   80.76    3.62
   2  -5   7   78.28    4.05
  -1   4  -7   49.02    2.68
   4  -3  -7   45.65    2.33
  -3  -1  -7   43.65    2.66
  -3  -1  -7   44.47    2.62
  -1   4  -7   49.94    2.68
  -3  -1  -7   48.38    2.80
  -3  -1  -7   45.19    2.47
   1  -4   7   47.88    2.83
   3   1   7   49.40    2.57
  -4   3   7   48.65    2.21
   0   3  -7   29.41    1.58
   3  -3  -7   24.31    1.43
  -3   0  -7   23.61    1.95
  -3   0  -7   22.62    1.57
  -3   0  -7   25.83    1.71
  -3   0  -7   24.77    1.83
   3  -3  -7   24.57    1.42
   0   3  -7   25.83    1.76
   3   0   7   20.80    1.59
  -3   3   7   24.33    1.46
  -3   3   7   24.01    1.42
   0  -3   7   24.02    1.85
  -3   3   7   22.45    1.67
   3   0   7   24.56    1.70
   0  -3   7   23.60    1.73
  -3   3   7   23.47    1.25
   1   2  -7   62.86    2.73
   1   2  -7   63.04    3.07
   2  -3  -7   62.16    2.84
   2  -3  -7   54.96    2.63
   2  -3  -7   56.76    2.84
  -3   1  -7   55.56    3.19
   1   2  -7   56.10    3.05
  -3   1  -7   62.80    3.06
  -2   3   7   62.50    2.91
  -2   3   7   55.54    3.01
  -1  -2   7   64.10    3.11
  -2   3   7   61.25    2.55
  -1  -2   7   63.26    3.22
  -2   3   7   56.56    2.85
   3  -1   7   63.89    3.12
  -3   2  -7  147.79    6.45
   1  -3  -7  145.07    6.44
   1  -3  -7  144.47    6.40
   1  -3  -7  157.68    6.44
   2   1  -7  142.92    6.49
  -3   2  -7  147.96    6.25
   1  -3  -7  138.67    6.08
   2   1  -7  154.67    6.12
  -2  -1   7  156.78    6.37
  -1   3   7  147.40    6.58
  -2  -1   7  154.47    6.79
   3  -2   7  154.38    6.80
  -1   3   7  156.13    6.64
  -1   3   7  149.62    6.70
  -3   3  -7  133.58    5.50
   0  -3  -7  130.12    5.64
   0  -3  -7  119.56    5.58
   0  -3  -7  124.80    5.61
   0  -3  -7  120.40    5.24
   3   0  -7  118.97    5.55
  -3   0   7  127.06    5.67
   0   3   7  118.79    5.05
  -3   0   7  125.86    5.12
   0   3   7  125.52    5.03
   0   3   7  120.16    5.65
   0   3   7  113.55    5.45
   0   3   7  123.01    5.42
  -3   4  -7  137.47    6.28
   4  -1  -7  136.89    6.18
  -1  -3  -7  140.09    5.95
  -1  -3  -7  147.31    6.36
  -1  -3  -7  143.62    6.33
  -1  -3  -7  133.72    6.27
   3  -4   7  143.74    6.10
   1   3   7  138.72    5.72
   1   3   7  137.56    5.73
  -4   1   7  136.64    5.73
   1   3   7  121.70    6.03
  -2  -3  -7   37.88    2.45
   5  -2  -7   36.19    2.16
  -2  -3  -7   37.17    2.48
  -3   5  -7   34.83    2.55
  -2  -3  -7   35.37    2.00
  -3   5  -7   37.87    2.36
  -2  -3  -7   35.71    2.40
   3  -5   7   36.11    2.43
  -5   2   7   37.67    2.00
   2   3   7   36.34    2.30
   2   3   7   38.01    1.98
  -3  -3  -7   10.68    1.11
  -3  -3  -7    8.80    1.46
  -3  -3  -7   11.76    1.57
  -3  -3  -7   11.09    1.48
  -3   6  -7   10.71    1.37
   6  -3  -7   11.10    1.21
  -6   3   7   13.56    1.25
   3  -6   7   11.75    1.60
   3   3   7   11.35    1.14
  -4  -3  -7    6.87    1.52
  -4  -3  -7    6.98    1.38
  -3   7  -7   10.53    1.44
  -4  -3  -7    5.91    1.43
   7  -4  -7    7.08    1.14
  -4  -3  -7    5.64    0.93
   3  -7   7    7.43    1.57
  -7   4   7    7.23    1.19
   4   3   7    5.92    1.05
  -4  -2  -7   50.12    3.13
  -2   6  -7   48.84    2.92
  -4  -2  -7   50.39    3.14
  -4  -2  -7   50.76    3.10
   6  -4  -7   49.78    2.69
   4   2   7   51.60    2.85
   2  -6   7   54.21    3.32
  -4  -1  -7   12.42    1.49
  -1   5  -7   17.41    1.62
  -4  -1  -7   13.69    1.52
   5  -4  -7   13.35    1.23
  -4  -1  -7   14.04    1.56
   1  -5   7   15.58    1.73
   4   1   7   15.10    1.39
  -5   4   7   15.86    0.97
  -4   0  -7    5.18    1.12
   0   4  -7    5.10    0.99
  -4   0  -7    5.94    1.01
   4  -4  -7    5.74    0.70
  -4   0  -7    5.56    1.13
   0   4  -7    6.02    0.89
   4   0   7    6.58    1.00
   0  -4   7    6.14    1.26
  -4   4   7    6.10    0.74
  -4   4   7    7.12    0.93
  -4   4   7    5.74    0.62
   3  -4  -7   12.37    1.07
   3  -4  -7   12.34    0.87
  -4   1  -7   12.84    1.51
  -4   1  -7   10.73    1.25
   1   3  -7   16.51    1.58
   1   3  -7   14.53    1.16
   1   3  -7   14.64    1.46
  -4   1  -7   11.41    1.34
  -4   1  -7   12.84    1.21
  -3   4   7   14.52    1.42
   4  -1   7   14.83    1.42
  -3   4   7   12.65    1.18
  -1  -3   7   12.72    1.49
  -1  -3   7   15.70    1.25
  -3   4   7   13.82    1.23
   2  -4  -7    1.78    0.32
  -4   2  -7    1.37    0.87
   2  -4  -7    1.74    0.91
   2   2  -7    1.53    0.91
   2   2  -7    2.76    0.59
   2   2  -7    1.91    0.81
   2  -4  -7    1.78    0.82
  -4   2  -7    4.15    1.11
   2  -4  -7    2.72    0.75
  -2   4   7    1.32    0.68
  -2   4   7    1.48    0.68
  -2  -2   7    2.23    0.98
  -2   4   7    2.15    0.79
  -2  -2   7    1.36    0.57
   4  -2   7    2.35    0.83
   3   1  -7   52.51    2.46
  -4   3  -7   55.44    2.68
   1  -4  -7   49.68    2.76
   1  -4  -7   51.05    2.82
   1  -4  -7   52.94    2.92
   3   1  -7   50.84    2.84
   4  -3   7   50.75    2.82
  -3  -1   7   50.90    2.90
  -1   4   7   46.34    2.72
  -1   4   7   49.58    2.63
  -3  -1   7   47.93    2.34
   4   0  -7    5.34    0.57
   0  -4  -7    4.10    0.93
   0  -4  -7    4.84    0.56
   4   0  -7    5.95    0.72
   0  -4  -7    4.25    1.04
   0  -4  -7    6.51    1.20
   4   0  -7    4.34    0.94
  -4   0   7    4.83    1.17
   4  -4   7    4.32    1.04
   0   4   7    3.10    0.91
  -4   0   7    6.62    0.72
  -1  -4  -7    5.61    1.18
  -4   5  -7    5.28    1.19
  -1  -4  -7    5.41    0.70
  -1  -4  -7    6.50    1.24
  -1  -4  -7    3.91    1.04
   5  -1  -7    6.15    0.97
   1   4   7    4.22    1.12
  -5   1   7    4.46    1.24
   4  -5   7    5.17    1.07
   1   4   7    5.30    0.61
  -5   1   7    5.55    0.76
  -2  -4  -7   10.19    1.46
  -2  -4  -7   11.49    1.08
  -2  -4  -7   15.40    1.73
  -2  -4  -7   12.59    1.68
   6  -2  -7   12.23    1.38
   4  -6   7   13.05    1.57
   2   4   7   12.15    1.06
  -6   2   7   12.78    1.18
  -3  -4  -7    4.86    1.40
   7  -3  -7    4.90    1.02
  -3  -4  -7    3.56    0.80
  -3  -4  -7    4.08    1.22
  -4   7  -7    5.50    1.16
  -3  -4  -7    5.30    1.48
  -7   3   7    4.83    1.01
   4  -7   7    4.26    1.40
   3   4   7    6.22    0.94
  -4   8  -7    9.71    1.46
  -4  -4  -7    7.11    1.50
   8  -4  -7    9.84    1.40
  -4  -4  -7    5.37    1.48
  -4  -4  -7    9.16    1.86
  -8   4   7   10.05    1.41
   4  -8   7   10.09    1.88
   4   4   7    7.72    1.20
  -5  -4  -7   31.76    2.83
   9  -5  -7   29.40    2.51
  -5  -4  -7   27.39    2.97
  -4   9  -7   28.73    2.44
  -5  -4  -7   26.21    2.73
  -9   5   7   30.51    2.54
   4  -9   7   30.51    3.07
   5   4   7   31.14    2.40
  -3   8  -7    3.30    1.19
  -5  -3  -7    2.59    1.32
  -5  -3  -7    2.15    1.39
  -5  -3  -7    0.04    0.86
  -5  -3  -7    2.84    1.51
   8  -5  -7    0.74    0.98
   3  -8   7    2.75    1.51
   5   3   7    2.12    1.05
  -8   5   7    1.03    1.11
  -5  -2  -7   14.88    1.99
  -2   7  -7   13.61    1.59
  -5  -2  -7   14.13    1.80
  -5  -2  -7   12.72    1.80
   7  -5  -7   11.01    1.33
  -5  -2  -7   10.33    1.33
   2  -7   7   11.67    1.84
   5   2   7   10.67    1.33
  -5  -1  -7    8.30    1.47
  -1   6  -7    9.64    1.35
   6  -5  -7   10.92    1.10
  -5  -1  -7    8.62    1.52
  -5  -1  -7    8.06    1.44
  -5  -1  -7    8.58    1.18
  -6   5   7    9.73    0.89
   5   1   7    8.26    1.19
   1  -6   7    9.50    1.61
  -5   0  -7   10.67    1.42
  -5   0  -7   11.89    1.55
   0   5  -7   11.30    1.32
   5  -5  -7   13.04    1.07
  -5   0  -7   11.89    1.49
   5   0   7   11.42    1.34
  -5   5   7   14.53    1.13
   0  -5   7   14.26    1.84
  -5   1  -7   21.86    1.98
  -5   1  -7   20.05    1.90
   4  -5  -7   20.70    1.23
   1   4  -7   20.49    1.82
   1   4  -7   22.66    1.59
  -5   1  -7   22.53    1.85
  -4   5   7   22.68    1.70
  -1  -4   7   20.33    2.05
  -4   5   7   21.16    1.45
  -1  -4   7   22.25    1.67
   5  -1   7   21.12    1.90
   3  -5  -7    9.99    0.66
   3  -5  -7   10.80    1.13
  -5   2  -7    9.45    1.34
   2   3  -7   14.51    1.49
  -5   2  -7    9.99    1.43
  -2  -3   7   13.59    1.64
   5  -2   7   11.27    1.38
  -3   5   7   11.81    1.14
  -2  -3   7   12.95    1.21
   2  -5  -7    7.44    1.21
   2  -5  -7    6.95    1.05
   3   2  -7    8.63    0.89
   2  -5  -7    5.51    1.09
   3   2  -7    4.89    0.95
  -5   3  -7    7.08    1.20
  -5   3  -7    8.00    1.42
  -3  -2   7    8.27    0.95
  -3  -2   7    5.41    1.28
   5  -3   7    7.04    1.13
   4   1  -7    1.12    0.75
   4   1  -7    1.31    0.51
  -5   4  -7    1.96    0.81
   1  -5  -7    1.05    0.83
   1  -5  -7    1.40    0.32
   1  -5  -7   -0.69    0.94
   1  -5  -7    1.64    0.95
   4   1  -7    1.82    0.63
  -4  -1   7    2.59    1.10
   5  -4   7    2.15    0.97
  -4  -1   7    0.86    0.60
   5   0  -7   87.70    4.41
   5   0  -7   87.20    3.87
   0  -5  -7   88.48    3.87
   0  -5  -7   92.01    4.56
   0  -5  -7   92.57    4.45
   0  -5  -7   90.27    4.67
   5  -5   7   93.58    4.69
  -5   0   7   89.04    4.81
  -5   0   7   91.86    4.17
   6  -1  -7    1.67    0.79
  -1  -5  -7    0.73    1.02
  -1  -5  -7    2.63    1.24
  -1  -5  -7    1.47    0.53
  -1  -5  -7    0.88    0.99
  -6   1   7    0.74    1.15
   5  -6   7    0.78    0.98
   1   5   7    0.54    0.49
  -6   1   7    2.10    0.73
  -2  -5  -7    2.45    1.42
  -2  -5  -7    5.32    1.43
   7  -2  -7    7.03    1.25
  -2  -5  -7    4.42    0.75
  -2  -5  -7    3.34    1.26
  -7   2   7    6.85    1.10
   2   5   7    6.44    0.88
   5  -7   7    7.72    1.54
  -3  -5  -7   16.57    1.52
   8  -3  -7   16.44    1.73
  -3  -5  -7   19.47    2.39
  -3  -5  -7   18.71    2.14
  -3  -5  -7   16.62    1.99
   3   5   7   19.74    1.69
   5  -8   7   20.76    2.34
  -8   3   7   19.81    1.81
  -4  -5  -7   10.19    2.13
  -4  -5  -7   11.64    2.01
  -4  -5  -7   12.20    1.89
   9  -4  -7   11.57    1.65
   5  -9   7   12.29    2.04
  -9   4   7   11.32    1.59
  -5  -5  -7   13.02    2.34
  -5  -5  -7    8.98    1.89
  -5  -5  -7    9.35    1.92
  10  -5  -7    8.06    1.62
   5 -10   7    8.67    2.16
 -10   5   7    9.10    1.68
  -6  -5  -7   -0.81    1.49
  -6  -5  -7    3.45    2.12
  -6  -5  -7    1.35    1.59
  11  -6  -7    1.26    1.39
 -11   6   7   -0.27    1.45
   5 -11   7    3.67    2.06
  -4  10  -7    5.84    1.40
  -6  -4  -7    6.32    1.75
  10  -6  -7    8.98    1.64
  -6  -4  -7    5.66    2.06
  -6  -4  -7    7.46    1.88
 -10   6   7    7.59    1.66
   4 -10   7    6.86    2.05
  -6  -3  -7    6.42    1.74
  -6  -3  -7    6.03    1.82
   9  -6  -7    7.75    1.42
  -6  -3  -7    7.05    1.65
  -3   9  -7   10.35    1.64
   3  -9   7   10.17    2.12
   6   3   7    7.67    1.42
  -9   6   7   11.26    1.63
  -2   8  -7   41.13    2.76
   8  -6  -7   34.60    2.53
  -6  -2  -7   38.35    3.12
  -6  -2  -7   40.76    3.30
  -6  -2  -7   35.58    3.01
   6   2   7   37.08    2.75
   2  -8   7   43.43    3.39
  -1   7  -7    6.17    1.30
  -6  -1  -7    5.36    1.39
   7  -6  -7    7.47    1.09
  -6  -1  -7    5.25    1.49
  -6  -1  -7    5.63    1.50
   1  -7   7    5.95    1.67
  -7   6   7    4.91    0.69
   6   1   7    7.06    1.29
  -6   0  -7   20.05    2.02
  -6   0  -7   15.92    1.88
  -6   0  -7   16.22    1.96
   0   6  -7   18.20    1.77
   6  -6  -7   17.69    1.47
  -6   6   7   16.16    1.36
   0  -6   7   18.61    2.23
   6   0   7   20.21    1.85
  -6   1  -7   82.27    4.34
  -6   1  -7   78.10    4.30
   5  -6  -7   81.42    3.66
   1   5  -7   85.34    4.28
  -6   1  -7   82.30    4.34
  -1  -5   7   85.70    4.72
  -1  -5   7   83.66    4.24
  -5   6   7   84.80    3.97
   6  -1   7   87.31    4.41
  -6   2  -7   39.02    2.86
   2   4  -7   44.85    2.73
  -6   2  -7   41.30    2.76
   4  -6  -7   41.54    1.93
   6  -2   7   44.36    2.85
  -2  -4   7   45.57    3.06
  -2  -4   7   43.18    2.55
   3  -6  -7   69.59    3.85
   3   3  -7   63.33    3.52
  -6   3  -7   61.11    3.57
   3   3  -7   67.31    3.27
  -6   3  -7   63.94    3.73
  -3  -3   7   67.23    3.41
  -3  -3   7   66.94    3.98
   6  -3   7   69.85    3.75
   2  -6  -7   55.83    3.14
   4   2  -7   55.58    3.21
   2  -6  -7   52.49    3.41
   4   2  -7   60.20    2.86
   2  -6  -7   56.70    3.30
   4   2  -7   57.27    2.90
  -6   4  -7   62.78    3.40
   6  -4   7   55.25    3.31
  -4  -2   7   54.29    2.84
  -4  -2   7   57.23    3.51
   5   1  -7   55.74    2.71
   1  -6  -7   51.16    2.24
   5   1  -7   42.66    2.46
   1  -6  -7   57.49    3.46
   5   1  -7   52.18    3.03
   1  -6  -7   50.27    3.15
   1  -6  -7   49.57    3.00
  -5  -1   7   55.10    3.52
  -5  -1   7   52.98    2.83
   6  -5   7   56.93    3.34
   0  -6  -7   36.40    2.65
   6   0  -7   30.76    1.70
   0  -6  -7   33.09    2.79
   0  -6  -7   31.09    1.68
   0  -6  -7   31.88    2.39
   6   0  -7   32.69    2.37
  -6   0   7   38.98    2.99
  -6   0   7   31.93    2.10
   6  -6   7   33.76    2.61
  -1  -6  -7    6.24    0.81
  -1  -6  -7    5.99    1.35
   7  -1  -7    7.37    1.31
  -1  -6  -7    6.13    1.65
  -1  -6  -7    6.60    1.52
   6  -7   7    6.34    1.52
  -7   1   7    6.86    1.70
  -7   1   7    6.88    1.13
   1   6   7    6.36    0.76
  -2  -6  -7   20.14    2.25
  -2  -6  -7   25.95    2.70
  -2  -6  -7   18.69    2.10
   8  -2  -7   19.66    1.98
  -8   2   7   22.58    2.64
   6  -8   7   23.86    2.33
  -8   2   7   23.96    1.99
   2   6   7   24.38    1.94
  -3  -6  -7   14.89    2.04
   9  -3  -7   16.64    1.87
  -3  -6  -7   18.69    2.52
  -3  -6  -7   12.94    2.06
  -9   3   7   19.26    1.93
   6  -9   7   19.67    2.35
   6  -9   7   17.45    2.42
  10  -4  -7    5.87    1.62
  -4  -6  -7    5.32    1.74
  -4  -6  -7    6.35    1.65
  -4  -6  -7    7.19    2.27
 -10   4   7    8.06    1.58
   6 -10   7    6.71    2.04
   6 -10   7    9.04    1.90
  -5  -6  -7    4.32    2.09
  11  -5  -7    3.83    1.53
  -5  -6  -7    2.80    1.69
  -5  -6  -7    1.92    1.60
 -11   5   7    2.55    1.51
   6 -11   7    5.02    2.13
  -6  -6  -7    3.42    1.85
  -6  -6  -7    8.52    2.58
  -6  -6  -7    2.95    1.82
  12  -6  -7    5.80    1.77
   6 -12   7    2.98    2.14
 -12   6   7    4.19    1.78
  -7  -5  -7   14.85    2.99
  12  -7  -7   18.95    2.36
  -7  -5  -7   14.24    2.45
  -7  -5  -7   17.12    2.77
   5 -12   7   17.73    3.03
 -12   7   7   18.17    2.60
  11  -7  -7    5.62    1.63
  -7  -4  -7    5.34    2.26
  -7  -4  -7    4.75    1.86
  -7  -4  -7    7.49    2.05
   4 -11   7    6.62    2.28
 -11   7   7    7.78    1.80
  -7  -3  -7   24.60    2.65
  10  -7  -7   22.26    2.23
  -3  10  -7   23.98    2.39
  -7  -3  -7   25.71    2.84
  -7  -3  -7   20.33    2.84
 -10   7   7   24.19    2.42
   7   3   7   21.75    2.27
   3 -10   7   23.73    3.00
  -7  -2  -7   25.96    2.55
  -2   9  -7   23.07    2.20
  -7  -2  -7   22.31    2.50
   9  -7  -7   21.88    2.04
  -7  -2  -7   24.44    2.79
   7   2   7   23.22    2.23
   2  -9   7   23.09    2.78
  -7  -1  -7   23.95    2.59
  -1   8  -7   34.29    2.58
   8  -7  -7   27.41    2.16
  -7  -1  -7   22.93    2.72
  -7  -1  -7   29.51    2.68
   7   1   7   25.71    2.31
   1  -8   7   28.53    3.00
  -7   0  -7    2.80    1.38
  -7   0  -7    7.88    1.68
   0   7  -7    4.33    1.25
   7  -7  -7    5.55    0.98
  -7   0  -7    4.53    1.49
   0  -7   7    2.93    1.62
  -7   7   7    3.10    0.77
   7   0   7    3.88    1.27
  -7   1  -7   20.00    2.15
   1   6  -7   21.00    2.03
   6  -7  -7   20.04    1.49
  -7   1  -7   19.70    2.16
  -7   1  -7   19.92    2.08
  -1  -6   7   24.44    2.64
  -6   7   7   19.49    1.85
  -1  -6   7   24.36    2.12
   7  -1   7   21.89    2.05
  -7   2  -7   16.71    1.97
  -7   2  -7   17.71    2.05
   5  -7  -7   17.57    1.19
   2   5  -7   19.97    1.94
  -7   2  -7   17.07    1.91
   7  -2   7   20.12    2.03
  -2  -5   7   19.77    1.87
  -2  -5   7   20.73    2.40
  -7   3  -7   22.46    2.18
   3   4  -7   23.40    2.07
   4  -7  -7   20.46    1.10
  -7   3  -7   17.24    1.96
   4  -7  -7   19.96    1.06
  -3  -4   7   22.64    1.87
  -3  -4   7   18.88    2.22
   7  -3   7   23.54    2.12
  -7   4  -7    8.17    1.58
  -7   4  -7   11.24    1.77
   3  -7  -7   11.99    1.82
   4   3  -7   10.06    1.49
   7  -4   7    9.33    1.48
  -4  -3   7   11.16    1.31
  -4  -3   7   10.20    1.82
   2  -7  -7    3.61    1.54
   5   2  -7    6.98    1.21
  -7   5  -7    6.08    1.44
   2  -7  -7    5.52    1.41
  -5  -2   7    8.64    1.70
   7  -5   7    3.79    1.26
  -5  -2   7    7.86    1.13
   6   1  -7   56.62    3.36
   1  -7  -7   57.16    3.53
   1  -7  -7   56.19    3.76
   1  -7  -7   55.24    2.55
   1  -7  -7   57.37    3.37
  -6  -1   7   54.93    3.15
   7  -6   7   62.94    3.70
  -6  -1   7   62.00    3.99
   0  -7  -7   34.02    2.69
   0  -7  -7   25.97    1.61
   0  -7  -7   27.11    2.40
   7   0  -7   28.89    1.64
   7   0  -7   28.93    2.46
   0  -7  -7   28.35    2.84
  -7   0   7   32.93    2.29
   7  -7   7   32.99    2.83
  -7   0   7   32.77    3.17
  -1  -7  -7    3.37    1.72
  -1  -7  -7   -0.59    1.10
   8  -1  -7    1.43    1.10
  -1  -7  -7    1.55    1.40
  -8   1   7    0.15    1.60
   7  -8   7    2.00    1.36
  -8   1   7    4.93    1.15
   9  -2  -7   20.31    2.29
  -2  -7  -7   20.43    2.43
  -2  -7  -7   21.80    2.72
  -2  -7  -7   19.02    2.21
   7  -9   7   18.57    2.33
  -9   2   7   24.18    2.88
  -9   2   7   24.13    2.13
  10  -3  -7   12.33    1.93
  -3  -7  -7    7.69    1.72
  -3  -7  -7   11.74    2.50
  -3  -7  -7    4.98    1.82
 -10   3   7   10.71    2.42
   7 -10   7   11.54    2.02
 -10   3   7   10.00    1.68
  -4  -7  -7    6.42    1.77
  -4  -7  -7    4.52    2.18
  -4  -7  -7    5.00    1.94
  11  -4  -7    6.97    1.78
 -11   4   7    8.32    1.76
   7 -11   7    9.99    2.08
  -5  -7  -7    3.58    1.95
  12  -5  -7    6.75    1.76
  -5  -7  -7    1.67    1.58
  -5  -7  -7    3.70    2.29
   7 -12   7    1.50    2.33
   7 -12   7    4.70    1.89
 -12   5   7    2.99    1.74
  -8  -4  -7    8.25    2.22
  -8  -4  -7    9.88    2.50
  -8  -4  -7    3.88    1.97
  12  -8  -7    5.48    1.68
 -12   8   7    6.04    1.98
   4 -12   7    5.90    2.48
  11  -8  -7    1.62    1.35
  -8  -3  -7    0.22    1.75
  -8  -3  -7    2.26    1.76
  -8  -3  -7    2.17    1.71
 -11   8   7    1.22    1.51
   3 -11   7   -4.20    1.89
  10  -8  -7    7.54    1.50
  -8  -2  -7    6.81    1.93
  -8  -2  -7   10.53    2.43
  -8  -2  -7    4.14    1.76
   8   2   7    9.70    1.79
   2 -10   7    8.46    2.31
  -8  -1  -7   10.11    2.19
  -8  -1  -7   12.16    2.07
  -1   9  -7   12.60    1.83
  -8  -1  -7    9.28    1.90
   9  -8  -7   11.37    1.55
   8   1   7   11.37    1.79
   1  -9   7   13.94    2.54
  -8   0  -7    4.53    1.60
   8  -8  -7    4.29    1.03
  -8   0  -7    5.85    1.66
   0   8  -7    3.53    1.26
  -8   0  -7    2.91    1.59
   0  -8   7    3.10    1.82
   8   0   7    2.65    1.37
  -8   1  -7    2.12    1.56
  -8   1  -7    4.01    1.50
   1   7  -7    2.49    1.21
   7  -8  -7    3.83    0.89
  -8   1  -7    1.30    1.31
  -1  -7   7    5.03    1.36
   8  -1   7    3.69    1.35
  -1  -7   7    4.13    1.86
   2   6  -7   13.37    1.78
  -8   2  -7    7.43    1.68
   6  -8  -7   12.86    1.07
  -8   2  -7   11.51    1.89
  -8   2  -7   12.37    1.90
   8  -2   7    7.89    1.57
  -2  -6   7   13.47    2.17
  -2  -6   7   10.51    1.55
   5  -8  -7   24.78    1.38
   5  -8  -7   22.73    1.37
   3   5  -7   27.40    2.43
  -8   3  -7   27.66    2.49
  -8   3  -7   20.66    2.36
  -3  -5   7   27.06    2.78
   8  -3   7   23.06    2.35
  -3  -5   7   26.67    2.20
   4  -8  -7    3.35    0.42
  -8   4  -7    2.80    1.47
   4  -8  -7    2.54    1.63
  -8   4  -7    3.04    1.40
   4  -8  -7    2.80    0.40
   4   4  -7    4.15    1.30
   8  -4   7    4.97    1.45
  -4  -4   7    4.81    1.64
  -4  -4   7    2.26    1.00
  -8   5  -7   33.02    2.91
   3  -8  -7   28.96    2.90
   5   3  -7   29.80    2.62
  -8   5  -7   35.22    2.82
   8  -5   7   33.89    2.78
  -5  -3   7   28.45    2.24
  -5  -3   7   32.17    3.05
   6   2  -7    3.82    1.28
   2  -8  -7    2.73    1.38
   2  -8  -7    0.98    0.39
   2  -8  -7    1.61    1.49
  -6  -2   7    0.37    0.87
   8  -6   7    3.47    1.37
  -6  -2   7    1.63    1.49
   1  -8  -7   17.93    2.24
   1  -8  -7   17.04    2.47
   7   1  -7   19.98    2.17
  -7  -1   7   17.35    1.79
   8  -7   7   14.91    1.97
  -7  -1   7   17.81    2.43
   8   0  -7    7.48    1.62
   0  -8  -7    5.49    1.84
   0  -8  -7    5.54    1.67
  -8   0   7    4.12    1.19
  -8   0   7    5.45    1.93
   8  -8   7    3.51    1.50
  -1  -8  -7    6.47    2.10
  -1  -8  -7    8.13    1.93
   9  -1  -7    7.54    1.57
  -9   1   7    5.15    1.37
  -9   1   7    7.12    2.12
   8  -9   7    5.16    1.59
  10  -2  -7    1.94    1.53
  -2  -8  -7    3.55    2.01
  -2  -8  -7    0.34    1.65
 -10   2   7    3.79    1.97
 -10   2   7    2.16    1.40
   8 -10   7    1.89    1.52
  -3  -8  -7   -0.28    1.88
  11  -3  -7   -1.45    1.45
  -3  -8  -7   -0.76    1.61
 -11   3   7   -0.09    1.24
   8 -11   7   -0.60    1.63
 -11   3   7    0.71    1.95
  12  -4  -7    8.91    1.99
  -4  -8  -7    7.26    2.50
  -4  -8  -7    6.06    2.08
 -12   4   7    7.20    2.58
 -12   4   7    6.58    1.92
   8 -12   7   10.52    2.26
  -9  -3  -7   -0.56    1.80
  -9  -3  -7   -1.36    1.75
  12  -9  -7   -2.15    1.26
  -9  -3  -7    0.71    2.03
 -12   9   7    0.80    1.78
   3 -12   7    1.89    2.23
  -9  -2  -7    0.59    1.81
  -9  -2  -7   -0.80    1.61
  -9  -2  -7    3.47    2.26
  11  -9  -7    0.60    1.28
   2 -11   7   -0.96    1.99
  -9  -1  -7   -1.24    1.58
  10  -9  -7    0.48    1.11
  -9  -1  -7    1.50    1.77
  -9  -1  -7    0.87    1.56
   9   1   7   -0.90    1.32
   1 -10   7    1.74    2.03
   9  -9  -7    4.20    1.15
   0   9  -7    4.87    1.46
  -9   0  -7    6.77    1.84
  -9   0  -7    5.11    1.73
  -9   0  -7    3.36    1.90
   9   0   7    4.20    1.59
   0  -9   7    4.03    2.04
   1   8  -7    9.36    1.73
  -9   1  -7   11.76    2.16
  -9   1  -7   10.59    2.06
  -9   1  -7   13.96    2.05
   8  -9  -7   11.38    1.34
   9  -1   7    9.21    1.79
  -1  -8   7   13.16    1.93
  -1  -8   7   13.85    2.48
  -9   2  -7    6.62    1.89
  -9   2  -7    6.18    1.67
   7  -9  -7    8.35    1.03
  -9   2  -7   10.44    1.89
   2   7  -7    9.36    1.61
   9  -2   7    9.28    1.77
  -2  -7   7    6.71    2.11
  -2  -7   7   10.64    1.65
   6  -9  -7    5.90    0.79
  -9   3  -7    2.56    1.51
   3   6  -7    6.75    1.49
  -9   3  -7    6.44    1.70
  -9   3  -7    4.40    1.56
  -3  -6   7    7.52    1.51
  -3  -6   7    6.61    2.03
   9  -3   7    4.54    1.44
   5  -9  -7    9.10    0.76
  -9   4  -7    9.47    1.89
  -9   4  -7    8.56    1.83
   4   5  -7   11.40    1.74
  -4  -5   7   11.16    2.18
   9  -4   7   10.88    1.73
  -4  -5   7   12.51    1.70
   5   4  -7   14.87    1.89
   4  -9  -7   13.60    0.83
   4  -9  -7   12.94    2.29
   4  -9  -7   12.93    0.87
  -9   5  -7   13.01    2.07
  -9   5  -7   16.73    2.22
   9  -5   7   13.44    2.03
  -5  -4   7   14.16    2.35
  -5  -4   7   18.23    1.85
  -9   6  -7   20.62    2.33
   3  -9  -7   17.06    2.54
  -9   6  -7   21.85    2.61
   3  -9  -7   18.98    1.14
   6   3  -7   20.52    2.13
  -6  -3   7   17.24    2.53
  -6  -3   7   19.44    1.96
   9  -6   7   18.96    2.20
   2  -9  -7   -0.01    1.73
   2  -9  -7    2.86    1.62
   7   2  -7    5.17    1.50
  -7  -2   7    3.47    1.74
   9  -7   7    3.61    1.57
  -7  -2   7    1.18    1.10
   1  -9  -7    9.35    2.28
   1  -9  -7    4.28    1.76
   8   1  -7    6.64    1.66
  -8  -1   7    8.66    1.53
   9  -8   7    5.45    1.61
  -8  -1   7    6.89    2.07
   0  -9  -7   14.22    2.62
   0  -9  -7   18.10    2.50
   9   0  -7   12.55    2.04
  -9   0   7    9.42    2.29
  -9   0   7   15.12    1.84
   9  -9   7   14.75    2.24
  -1  -9  -7   11.98    2.62
  -1  -9  -7    7.07    2.06
  10  -1  -7    9.52    1.93
 -10   1   7    9.74    2.42
 -10   1   7    7.88    1.67
   9 -10   7    9.95    2.02
  -2  -9  -7   -0.52    1.65
  11  -2  -7   -0.23    1.49
  -2  -9  -7    2.13    2.19
   9 -11   7    0.27    1.68
 -11   2   7    1.57    2.15
 -11   2   7    0.13    1.37
  12  -3  -7    3.74    1.78
  -3  -9  -7    6.81    2.56
  -3  -9  -7    4.26    2.11
 -12   3   7    6.40    2.60
 -12   3   7    4.40    1.79
   9 -12   7    5.78    2.09
  12 -10  -7    8.52    1.83
 -10  -2  -7   10.94    2.87
 -10  -2  -7    8.40    2.51
 -10  -2  -7    9.46    2.31
   2 -12   7   11.11    2.88
 -10  -1  -7    7.79    2.30
 -10  -1  -7    6.64    2.23
  11 -10  -7    5.94    1.53
 -10  -1  -7    3.98    2.14
   1 -11   7    9.06    2.63
 -10   0  -7    2.75    2.03
 -10   0  -7    4.34    1.81
 -10   0  -7    4.89    1.88
  10 -10  -7    0.75    1.07
   0 -10   7   -0.93    2.02
  10   0   7    1.47    1.54
 -10   1  -7    6.45    1.88
 -10   1  -7   10.82    2.01
 -10   1  -7    9.68    2.27
   9 -10  -7    5.72    1.21
  10  -1   7    6.94    1.75
  -1  -9   7    6.82    2.31
  -1  -9   7    5.48    1.76
 -10   2  -7   10.32    2.10
   2   8  -7   10.70    1.87
   8 -10  -7   10.11    1.19
 -10   2  -7    9.43    2.13
 -10   2  -7   10.27    1.98
  -2  -8   7   11.74    2.55
  -2  -8   7   11.92    1.97
  10  -2   7    8.89    1.90
 -10   3  -7    9.92    2.10
 -10   3  -7   10.97    1.94
 -10   3  -7    6.46    1.95
   3   7  -7   12.14    1.94
   7 -10  -7    9.96    1.08
  -3  -7   7    9.40    2.41
  10  -3   7    8.14    1.72
  -3  -7   7   12.81    1.87
 -10   4  -7    8.36    1.97
   4   6  -7    8.92    1.76
 -10   4  -7    9.85    1.89
   6 -10  -7    5.39    0.76
  -4  -6   7    8.95    2.31
  -4  -6   7    6.51    1.55
  10  -4   7    7.54    1.69
 -10   5  -7   11.31    2.14
 -10   5  -7   11.26    2.09
   5 -10  -7   15.48    2.55
   5 -10  -7   11.91    0.97
   5   5  -7   17.12    2.17
  10  -5   7   13.22    2.02
  -5  -5   7   16.60    2.62
  -5  -5   7   14.08    1.83
   4 -10  -7   13.18    0.94
   4 -10  -7   10.26    2.41
 -10   6  -7   11.88    2.14
   6   4  -7   12.99    1.95
 -10   6  -7   14.48    2.35
  10  -6   7   11.31    2.00
  -6  -4   7   16.21    2.72
  -6  -4   7   13.85    1.83
 -10   7  -7    5.53    1.86
 -10   7  -7    7.65    2.12
   3 -10  -7    5.90    2.07
   7   3  -7    8.05    1.75
  -7  -3   7    5.61    2.04
  -7  -3   7    5.20    1.38
  10  -7   7    4.93    1.56
   8   2  -7    7.08    1.76
 -10   8  -7    9.51    2.06
   2 -10  -7   11.64    2.42
   2 -10  -7    5.64    1.94
  -8  -2   7    8.76    1.62
  -8  -2   7    7.71    2.28
  10  -8   7   10.31    2.04
   1 -10  -7   24.26    2.97
   1 -10  -7   25.56    3.21
   9   1  -7   23.06    2.58
  -9  -1   7   24.95    3.31
  10  -9   7   21.36    2.59
  -9  -1   7   27.60    2.49
   0 -10  -7    5.41    2.09
  10   0  -7   13.79    2.14
   0 -10  -7    9.72    2.52
 -10   0   7    9.84    2.50
 -10   0   7    6.80    1.70
  10 -10   7    7.29    2.17
  -1 -10  -7    6.40    2.36
  -1 -10  -7    6.94    2.19
  11  -1  -7    4.57    1.78
  10 -11   7    6.46    2.04
 -11   1   7    1.46    1.55
 -11   1   7    5.40    2.30
  -2 -10  -7    5.30    2.22
  12  -2  -7    8.40    2.13
  -2 -10  -7    7.77    2.70
 -12   2   7    7.58    2.70
  10 -12   7    6.67    2.15
 -12   2   7   11.98    2.98
 -11   0  -7    6.77    2.13
 -11   0  -7    5.61    2.45
 -11   0  -7    5.52    1.99
  11 -11  -7    5.59    1.42
  11   0   7    4.56    1.93
   0 -11   7    6.81    2.85
 -11   1  -7    1.21    1.71
  10 -11  -7    0.62    1.04
 -11   1  -7    1.27    2.05
 -11   1  -7    1.94    1.95
  11  -1   7    1.37    1.75
  -1 -10   7    0.66    2.00
 -11   2  -7    7.50    2.05
   9 -11  -7    7.49    1.17
 -11   2  -7    6.21    2.10
 -11   2  -7    5.67    1.96
  -2  -9   7    6.00    1.83
  11  -2   7    6.02    1.87
  -2  -9   7    6.87    2.59
 -11   3  -7   10.47    2.27
   3   8  -7   16.93    2.28
   8 -11  -7   16.38    1.40
 -11   3  -7   11.95    2.40
 -11   3  -7   16.25    2.25
  11  -3   7   10.34    2.08
  -3  -8   7   13.53    2.10
  -3  -8   7   15.60    2.98
 -11   4  -7    5.22    1.74
   4   7  -7    6.32    1.70
 -11   4  -7    5.91    1.90
 -11   4  -7    5.31    1.92
   7 -11  -7    4.74    0.84
  -4  -7   7    5.81    1.66
  -4  -7   7    6.60    2.34
  11  -4   7    4.61    1.71
 -11   5  -7    9.84    2.12
   6 -11  -7    7.41    0.81
 -11   5  -7   11.42    2.08
   5   6  -7    7.47    1.80
  -5  -6   7    8.36    1.74
  11  -5   7    6.22    1.87
  -5  -6   7   11.47    2.54
 -11   6  -7   15.21    2.45
   6   5  -7   22.46    2.56
   5 -11  -7   16.56    2.86
 -11   6  -7   15.39    2.54
  -6  -5   7   18.47    2.20
  -6  -5   7   18.64    2.99
  11  -6   7   16.08    2.32
 -11   7  -7   24.21    2.90
 -11   7  -7   17.33    2.69
   4 -11  -7   16.33    2.93
   7   4  -7   21.00    2.46
  11  -7   7   19.03    2.50
  -7  -4   7   22.19    2.35
  -7  -4   7   19.13    3.12
 -11   8  -7    3.45    2.06
   8   3  -7    4.61    1.70
   3 -11  -7    7.25    2.33
 -11   8  -7    2.62    2.01
  11  -8   7    2.03    1.70
  -8  -3   7    3.67    1.38
  -8  -3   7    4.84    2.28
   9   2  -7    4.69    1.78
   2 -11  -7    5.61    2.34
 -11   9  -7    8.67    2.38
   2 -11  -7    8.15    2.20
  -9  -2   7    7.34    2.49
  11  -9   7    1.87    1.78
  -9  -2   7    4.90    1.58
   1 -11  -7    7.65    2.59
  10   1  -7    2.24    1.75
   1 -11  -7    1.93    1.94
  11 -10   7   -0.16    1.78
 -10  -1   7    0.47    2.17
 -10  -1   7    3.99    1.51
  11   0  -7    2.53    1.75
   0 -11  -7    2.17    2.39
   0 -11  -7   -2.44    1.72
 -11   0   7    3.28    2.45
  11 -11   7    0.85    1.93
 -11   0   7   -2.23    1.40
 -12   2  -7    3.63    2.20
 -12   2  -7    0.71    2.21
  10 -12  -7    2.22    1.14
 -12   2  -7    1.27    1.82
  12  -2   7    4.16    1.96
  -2 -10   7    1.72    1.83
  -2 -10   7    1.80    2.42
   9 -12  -7    1.38    0.91
 -12   3  -7    3.10    1.96
 -12   3  -7    1.80    1.79
 -12   3  -7    3.83    2.16
  12  -3   7    0.81    1.60
  -3  -9   7    2.47    2.27
  -3  -9   7   -1.51    1.52
 -12   4  -7   -0.69    1.89
 -12   4  -7    2.62    1.93
 -12   4  -7    0.97    1.63
  12  -4   7   -0.62    1.46
  -4  -8   7    3.30    2.47
  -4  -8   7    3.18    1.66
 -12   5  -7   -0.60    1.91
 -12   5  -7   -0.52    1.53
   5   7  -7   -0.08    1.44
 -12   5  -7    2.66    1.92
  -5  -7   7    0.57    2.18
  -5  -7   7    0.86    1.38
  12  -5   7   -1.79    1.60
   6   6  -7    2.72    1.62
 -12   6  -7    2.43    1.99
 -12   6  -7    1.34    1.68
  12  -6   7    0.55    1.76
  -6  -6   7    1.36    2.06
  -6  -6   7    0.81    1.50
 -12   7  -7   -1.69    1.63
   7   5  -7    2.59    1.59
   5 -12  -7    1.06    2.30
 -12   7  -7   -2.70    1.90
  12  -7   7   -2.09    1.51
  -7  -5   7    3.82    2.28
  -7  -5   7    0.53    1.31
 -12   8  -7   -2.98    1.86
   8   4  -7   -3.23    1.45
 -12   8  -7   -0.35    1.94
   4 -12  -7    0.82    2.24
  -8  -4   7    0.19    2.18
  -8  -4   7   -0.54    1.38
  12  -8   7    0.38    1.62
 -12   9  -7    4.13    2.33
 -12   9  -7    8.20    2.47
   3 -12  -7    5.03    2.41
   9   3  -7    5.96    1.90
  -9  -3   7    1.35    1.50
  12  -9   7    6.28    2.09
  -9  -3   7    5.41    2.47
  10   2  -7    6.88    1.89
 -12  10  -7   -0.20    2.21
 -12  10  -7    3.33    2.36
   2 -12  -7    1.48    2.25
  12 -10   7    2.21    1.93
 -10  -2   7    1.82    1.72
 -10  -2   7    3.00    2.49
   0   0  -8    2.29    0.82
   0   0  -8    2.05    0.45
   0   0  -8    2.49    0.67
   0   0   8    2.15    0.40
   0   0   8    1.53    0.53
   1  -1  -8    4.41    0.48
  -1   0  -8    4.56    0.98
  -1   0  -8    3.34    0.73
  -1   0  -8    4.00    0.68
   1  -1  -8    3.91    0.79
   1  -1  -8    2.66    0.60
   0   1  -8    3.20    0.74
   1   0   8    6.45    0.72
  -1   1   8    5.37    0.70
   0  -1   8    5.48    0.67
   1   0   8    3.77    0.71
   1   0   8    4.71    0.81
  -1   1   8    5.67    0.48
   0  -1  -8   59.09    2.95
   0  -1  -8   57.73    2.65
   1   0  -8   56.81    2.85
  -1   1  -8   57.09    2.42
  -1   1  -8   57.29    2.67
   0  -1  -8   54.90    2.71
  -1   1  -8   55.00    2.86
   0   1   8   51.52    2.37
   1  -1   8   55.09    2.27
   0   1   8   47.82    2.50
  -1   0   8   52.73    2.63
   0   1   8   53.77    2.44
  -1   0   8   54.26    2.56
   0   1   8   57.39    2.80
  -1  -1  -8   58.94    2.95
   2  -1  -8   57.89    2.94
  -1  -1  -8   59.10    2.64
   2  -1  -8   64.74    2.91
  -1   2  -8   64.46    2.84
  -1   2  -8   58.46    3.07
  -1  -1  -8   58.97    3.13
   1   1   8   60.12    3.05
   1   1   8   60.42    2.80
   1   1   8   56.09    2.75
   1   1   8   58.04    2.79
   1   1   8   54.49    2.56
   1  -2   8   60.99    2.77
   1  -2   8   59.18    3.18
  -2   1   8   60.28    2.78
  -1   3  -8   64.27    3.38
   3  -2  -8   62.23    3.09
  -2  -1  -8   62.17    3.05
  -2  -1  -8   63.89    3.19
   3  -2  -8   65.23    2.94
  -2  -1  -8   68.81    3.48
  -1   3  -8   74.30    3.30
  -2  -1  -8   65.20    3.30
  -3   2   8   66.43    2.88
   2   1   8   67.44    3.16
   2   1   8   63.84    3.20
   2   1   8   60.69    2.96
  -3   2   8   67.41    3.05
   1  -3   8   70.33    3.30
   2  -2  -8   39.79    2.06
   0   2  -8   42.96    2.18
   0   2  -8   38.50    2.29
  -2   0  -8   39.11    2.48
  -2   0  -8   42.57    2.23
   2  -2  -8   40.29    2.09
   0   2  -8   40.84    1.99
  -2   0  -8   37.59    1.79
   2   0   8   38.47    2.21
   2   0   8   37.16    2.11
  -2   2   8   41.46    1.95
  -2   2   8   41.18    1.88
   0  -2   8   40.15    2.22
  -2   2   8   39.33    2.11
   1   1  -8   17.41    1.55
   1   1  -8   19.94    1.01
   1  -2  -8   22.44    1.55
   1  -2  -8   17.40    1.27
  -2   1  -8   21.95    1.50
   1  -2  -8   19.16    1.29
  -2   1  -8   21.62    1.93
   2  -1   8   20.48    1.64
  -1   2   8   22.19    1.50
  -1  -1   8   20.78    1.53
  -1   2   8   19.75    1.35
  -1   2   8   20.81    1.24
  -1   2   8   18.40    1.15
   0  -2  -8  131.80    5.67
   2   0  -8  133.13    5.78
  -2   2  -8  137.43    5.52
  -2   2  -8  121.92    5.79
   0  -2  -8  125.93    5.56
   0  -2  -8  123.15    5.50
   0  -2  -8  134.46    5.82
   0   2   8  118.68    5.12
   0   2   8  120.88    5.23
   0   2   8  119.66    5.10
  -2   0   8  128.60    5.41
   0   2   8  113.96    5.22
   0   2   8  124.23    5.43
  -1  -2  -8   71.81    3.50
  -1  -2  -8   76.37    3.48
  -1  -2  -8   74.98    3.78
  -2   3  -8   80.91    3.59
   3  -1  -8   73.81    3.38
  -1  -2  -8   75.68    3.69
   3  -1  -8   76.82    3.62
  -2   3  -8   76.54    3.79
   1   2   8   71.65    3.25
   1   2   8   73.22    3.44
   1   2   8   67.05    3.35
   2  -3   8   81.40    3.48
   1   2   8   71.03    3.27
  -2  -2  -8   11.07    1.34
  -2   4  -8   14.73    1.40
  -2  -2  -8   12.51    1.41
   4  -2  -8   10.78    0.73
  -2  -2  -8   12.24    1.11
  -2  -2  -8    8.54    1.15
   4  -2  -8   11.52    1.10
   2   2   8   10.50    1.08
   2  -4   8   12.68    1.30
   2   2   8   10.85    0.96
  -4   2   8   10.06    0.82
  -2   5  -8   10.51    1.26
  -3  -2  -8    8.72    1.39
  -3  -2  -8    5.74    0.90
  -3  -2  -8    7.28    1.23
   5  -3  -8    7.22    0.96
  -3  -2  -8    8.67    1.24
   2  -5   8   10.44    1.41
   3   2   8    7.40    1.06
   3   2   8    7.96    0.96
   4  -3  -8   27.32    1.39
  -1   4  -8   27.39    1.72
  -3  -1  -8   24.87    1.77
  -3  -1  -8   27.38    2.13
   4  -3  -8   26.09    1.65
  -1   4  -8   30.38    2.02
  -1   4  -8   26.98    1.96
  -3  -1  -8   26.45    1.75
  -3  -1  -8   25.19    1.99
  -4   3   8   27.61    1.62
   3   1   8   26.59    1.79
   1  -4   8   27.09    2.03
  -3   0  -8   20.85    1.84
   0   3  -8   18.90    1.31
  -3   0  -8   18.63    1.37
  -3   0  -8   18.62    1.53
   3  -3  -8   19.39    1.30
   3  -3  -8   18.54    1.26
   0   3  -8   18.58    1.61
  -3   0  -8   21.28    1.68
  -3   3   8   19.44    1.13
  -3   3   8   21.03    1.59
   3   0   8   22.09    1.63
   0  -3   8   20.70    1.74
  -3   3   8   17.82    1.35
  -3   3   8   19.61    1.27
  -3   1  -8   -0.36    0.50
   1   2  -8    0.80    0.70
   1   2  -8   -0.13    0.63
  -3   1  -8    0.28    0.89
  -3   1  -8    1.97    0.83
   2  -3  -8    0.52    0.63
   2  -3  -8    0.32    0.44
   2  -3  -8    0.20    0.56
   1   2  -8    0.45    0.47
  -2   3   8    1.28    0.65
  -2   3   8    0.78    0.29
  -2   3   8    0.23    0.62
   3  -1   8    0.70    0.76
  -2   3   8    0.64    0.54
  -1  -2   8    1.03    0.79
   2   1  -8   25.51    1.87
  -3   2  -8   29.52    1.86
   2   1  -8   27.38    1.31
  -3   2  -8   27.80    1.50
   1  -3  -8   27.13    1.85
   1  -3  -8   25.04    1.40
   1  -3  -8   25.13    1.73
   1  -3  -8   24.66    1.75
   3  -2   8   27.25    2.02
  -1   3   8   24.19    1.16
  -2  -1   8   26.85    1.89
  -1   3   8   24.39    1.73
  -1   3   8   27.16    1.73
  -1   3   8   26.61    1.15
  -1   3   8   26.64    1.63
   0  -3  -8   22.70    1.62
  -3   3  -8   20.93    1.43
   0  -3  -8   20.83    1.65
   0  -3  -8   20.77    1.80
   3   0  -8   19.13    1.61
   0   3   8   20.42    1.44
   0   3   8   18.82    0.97
  -3   0   8   18.57    0.99
   0   3   8   16.61    1.00
  -3   0   8   22.39    1.83
   0   3   8   15.66    1.42
  -3   4  -8   46.17    2.66
  -1  -3  -8   50.81    2.89
  -1  -3  -8   51.10    2.47
  -1  -3  -8   48.85    2.79
   4  -1  -8   49.14    2.28
  -3   4  -8   55.00    2.87
   4  -1  -8   49.14    2.69
  -1  -3  -8   56.26    2.95
   1   3   8   46.95    2.28
   3  -4   8   51.12    2.64
  -4   1   8   47.03    2.19
   1   3   8   44.98    2.60
   1   3   8   48.82    2.24
  -2  -3  -8    0.85    0.91
  -2  -3  -8    1.56    0.59
  -2  -3  -8    0.92    0.92
  -3   5  -8    1.27    0.85
  -2  -3  -8    0.71    0.96
   5  -2  -8    1.00    0.67
  -3   5  -8    0.68    0.76
  -5   2   8    0.44    0.56
   2   3   8    0.84    0.77
   3  -5   8    0.82    0.89
   2   3   8    1.13    0.54
  -3  -3  -8   21.60    2.03
  -3  -3  -8   19.64    1.61
   6  -3  -8   23.05    1.77
  -3  -3  -8   21.11    2.03
  -3   6  -8   24.10    1.99
  -3  -3  -8   18.81    2.00
   3   3   8   18.19    1.54
   3  -6   8   20.99    2.01
  -6   3   8   19.95    1.51
  -4  -3  -8    9.72    1.64
  -3   7  -8   10.71    1.51
  -4  -3  -8    7.79    1.10
   7  -4  -8   12.81    1.40
  -4  -3  -8    7.77    1.59
  -4  -3  -8   10.12    1.64
   4   3   8   10.13    1.27
  -7   4   8    9.42    1.23
   3  -7   8   10.48    1.72
  -4  -2  -8   17.58    1.85
  -4  -2  -8   13.96    1.67
  -4  -2  -8   10.00    1.28
  -2   6  -8   19.55    1.83
  -4  -2  -8   14.26    1.75
   6  -4  -8   16.05    1.38
   2  -6   8   17.95    1.96
   4   2   8   14.51    1.37
   5  -4  -8    7.28    0.89
  -1   5  -8    5.79    1.10
  -4  -1  -8    5.52    1.26
  -4  -1  -8    5.40    1.13
  -4  -1  -8    4.61    1.14
  -5   4   8    6.68    0.65
  -5   4   8    5.55    0.92
   4   1   8    4.53    0.95
   1  -5   8    7.38    1.32
  -4   0  -8    2.34    0.97
  -4   0  -8    3.42    1.10
  -4   0  -8    2.55    0.85
   4  -4  -8    2.96    0.60
   0   4  -8    2.43    0.84
  -4   0  -8    0.35    0.50
   0   4  -8    2.42    0.68
   4  -4  -8    3.08    0.57
  -4   4   8    3.60    0.64
   0  -4   8    2.21    1.03
  -4   4   8    3.99    0.77
   4   0   8    3.03    0.88
  -4   4   8    3.17    0.50
   1   3  -8   17.23    1.56
   1   3  -8   17.83    1.24
  -4   1  -8   15.31    1.49
  -4   1  -8   16.80    1.52
   3  -4  -8   13.23    1.02
   1   3  -8   14.10    1.39
   3  -4  -8   16.82    1.35
  -4   1  -8   16.51    1.40
  -4   1  -8   16.55    1.73
  -3   4   8   14.79    1.47
  -1  -3   8   16.70    1.68
  -3   4   8   17.65    1.35
   4  -1   8   15.41    1.40
  -3   4   8   14.15    1.25
  -4   2  -8   57.90    3.18
   2  -4  -8   60.12    3.05
   2   2  -8   67.34    3.49
   2   2  -8   62.37    2.79
   2   2  -8   56.44    3.19
  -4   2  -8   62.42    3.48
   2  -4  -8   55.42    2.59
   2  -4  -8   61.46    3.06
  -2   4   8   62.36    3.25
   4  -2   8   65.82    3.35
  -2  -2   8   59.93    3.36
  -2  -2   8   64.02    2.88
  -2   4   8   56.59    3.01
  -2   4   8   60.90    3.07
   3   1  -8   49.82    2.35
   1  -4  -8   49.37    2.76
  -4   3  -8   48.98    2.57
  -4   3  -8   53.81    2.84
   3   1  -8   49.73    2.80
   1  -4  -8   54.55    2.89
   1  -4  -8   50.26    2.81
   4  -3   8   50.29    2.86
  -3  -1   8   47.79    2.24
  -1   4   8   46.98    2.55
  -1   4   8   42.42    2.63
  -3  -1   8   49.54    2.84
   4   0  -8   -0.12    0.64
   0  -4  -8    1.07    0.44
  -4   4  -8   -0.24    0.49
   0  -4  -8    2.72    0.96
   0  -4  -8    0.14    0.75
   0  -4  -8   -0.51    0.87
   4  -4   8    0.64    0.94
  -4   0   8    2.20    1.04
  -4   0   8   -0.04    0.45
   0   4   8    0.72    0.77
   5  -1  -8    8.07    1.12
  -1  -4  -8    6.47    1.23
  -1  -4  -8    7.40    0.80
  -1  -4  -8    6.17    1.20
  -4   5  -8    7.79    1.17
  -1  -4  -8    7.91    1.33
   1   4   8    8.26    0.74
   1   4   8    9.61    1.40
   4  -5   8   10.06    1.32
  -5   1   8    8.13    1.47
  -5   1   8   10.24    0.92
  -4   6  -8   30.78    2.24
  -2  -4  -8   32.60    2.54
  -2  -4  -8   30.06    2.40
  -2  -4  -8   28.02    1.81
   6  -2  -8   29.68    2.09
  -2  -4  -8   28.01    2.29
   4  -6   8   30.63    2.29
   2   4   8   27.63    1.67
  -6   2   8   26.77    1.76
  -3  -4  -8   21.14    2.10
  -4   7  -8   23.35    2.14
  -3  -4  -8   25.75    2.40
   7  -3  -8   24.92    2.03
  -3  -4  -8   24.05    2.34
  -3  -4  -8   24.33    1.74
  -7   3   8   28.25    1.96
   3   4   8   24.36    1.81
   4  -7   8   28.80    2.45
  -4  -4  -8    6.64    1.69
  -4  -4  -8    6.18    1.64
  -4  -4  -8    4.64    1.48
  -4   8  -8    8.21    1.39
   8  -4  -8    8.55    1.36
   4   4   8    8.46    1.21
   4  -8   8    8.12    1.74
  -8   4   8    8.43    1.33
  -4   9  -8    8.90    1.55
  -5  -4  -8    9.12    2.01
  -5  -4  -8   10.02    1.92
   9  -5  -8    9.79    1.54
  -5  -4  -8   10.78    1.95
   5   4   8   12.32    1.60
   4  -9   8   10.72    2.10
  -9   5   8    9.57    1.53
  -5  -3  -8   -0.58    0.91
  -5  -3  -8    0.57    1.34
   8  -5  -8    1.08    0.98
  -5  -3  -8   -0.27    1.32
  -5  -3  -8    1.73    1.30
  -3   8  -8    0.08    1.02
   3  -8   8   -0.49    1.40
  -8   5   8    1.00    1.06
   5   3   8    0.85    0.96
  -2   7  -8   16.53    1.72
  -5  -2  -8   13.03    1.82
  -5  -2  -8   13.24    1.82
  -5  -2  -8   15.83    1.95
   7  -5  -8   16.64    1.50
  -5  -2  -8   11.36    1.39
   5   2   8   17.17    1.65
   2  -7   8   18.41    2.20
  -5  -1  -8  120.26    5.84
  -5  -1  -8  106.94    5.75
   6  -5  -8  117.13    5.24
  -5  -1  -8  121.40    5.73
  -5  -1  -8  122.56    5.81
  -1   6  -8  113.01    5.63
   1  -6   8  117.28    5.99
  -6   5   8  119.97    5.06
   5   1   8  121.09    5.63
   5  -5  -8   25.68    1.58
  -5   0  -8   25.30    2.09
  -5   0  -8   25.38    2.26
  -5   0  -8   28.44    2.27
   0   5  -8   25.76    2.07
  -5   5   8   27.52    1.69
   0  -5   8   32.82    2.53
  -5   5   8   29.10    2.20
   5   0   8   30.99    2.24
   1   4  -8   16.74    1.69
  -5   1  -8   14.59    1.73
  -5   1  -8   14.71    1.47
   1   4  -8   15.19    1.34
  -5   1  -8   15.04    1.68
   4  -5  -8   14.45    1.03
  -4   5   8   14.32    1.40
  -1  -4   8   15.06    1.82
  -4   5   8   17.62    1.37
   5  -1   8   16.05    1.63
   2   3  -8   61.57    3.27
  -5   2  -8   56.68    3.47
   3  -5  -8   53.84    2.50
  -5   2  -8   61.34    3.31
   3  -5  -8   62.29    3.01
  -2  -3   8   65.24    3.47
  -3   5   8   55.55    2.94
   5  -2   8   60.50    3.32
  -2  -3   8   56.24    2.89
  -5   3  -8   55.60    3.08
   2  -5  -8   54.24    3.02
   3   2  -8   56.15    2.64
   3   2  -8   51.42    3.04
   2  -5  -8   54.33    2.93
  -5   3  -8   52.94    3.39
   2  -5  -8   53.63    3.18
   5  -3   8   60.91    3.40
  -3  -2   8   63.01    3.56
  -3  -2   8   58.53    2.91
   1  -5  -8   43.23    2.67
   1  -5  -8   45.61    2.82
   1  -5  -8   38.72    2.55
   4   1  -8   43.72    2.64
  -5   4  -8   45.19    2.49
   4   1  -8   42.15    2.19
  -4  -1   8   44.39    2.97
  -4  -1   8   42.98    2.22
   5  -4   8   42.72    2.80
   0  -5  -8   14.85    1.72
   0  -5  -8   18.58    1.77
   0  -5  -8   18.07    1.14
   5   0  -8   20.59    1.80
   5   0  -8   18.37    1.15
   0  -5  -8   19.19    1.94
  -5   0   8   20.30    1.40
  -5   0   8   20.34    2.13
   5  -5   8   20.02    1.99
  -1  -5  -8   41.29    2.91
  -1  -5  -8   37.17    2.04
  -1  -5  -8   43.04    2.76
   6  -1  -8   36.49    2.52
  -1  -5  -8   39.49    2.80
  -6   1   8   41.03    2.22
  -6   1   8   40.91    3.02
   1   5   8   38.11    1.92
   5  -6   8   41.38    2.95
  -2  -5  -8   13.70    1.84
  -2  -5  -8   15.47    2.01
   7  -2  -8   12.38    1.46
  -2  -5  -8   10.17    1.58
  -2  -5  -8   12.96    1.21
   2   5   8   18.79    1.39
   5  -7   8   17.64    2.00
  -7   2   8   17.72    1.58
  -3  -5  -8    0.74    1.39
   8  -3  -8    3.00    1.17
  -3  -5  -8    4.58    1.50
  -3  -5  -8    1.72    1.28
  -8   3   8    3.21    1.02
   5  -8   8    2.24    1.46
   3   5   8    3.72    0.88
   9  -4  -8   11.80    1.70
  -4  -5  -8   12.90    2.06
  -4  -5  -8   12.92    1.95
  -4  -5  -8   16.76    2.35
  -9   4   8   15.48    1.77
   5  -9   8   15.87    2.25
  10  -5  -8   17.29    2.01
  -5  -5  -8   16.68    2.42
  -5  -5  -8   15.53    2.45
  -5  -5  -8   11.41    2.12
   5 -10   8   18.10    2.59
 -10   5   8   20.57    2.15
  11  -6  -8   14.75    1.97
  -6  -5  -8   12.20    2.27
  -6  -5  -8   16.91    2.73
  -6  -5  -8   13.19    2.30
 -11   6   8   14.47    2.16
   5 -11   8   15.96    2.66
  -6  -4  -8   46.75    3.77
  10  -6  -8   42.45    3.15
  -4  10  -8   47.36    3.26
  -6  -4  -8   41.67    3.82
  -6  -4  -8   41.25    3.41
 -10   6   8   40.60    3.09
   4 -10   8   43.37    3.81
  -6  -3  -8    8.20    1.94
   9  -6  -8    9.06    1.46
  -6  -3  -8   11.12    2.08
  -6  -3  -8    6.80    1.66
  -3   9  -8    9.55    1.60
   3  -9   8   11.26    2.16
   6   3   8   11.46    1.61
  -9   6   8   13.15    1.71
  -6  -2  -8    8.37    1.77
   8  -6  -8   12.09    1.45
  -6  -2  -8    8.74    1.77
  -2   8  -8   14.08    1.77
  -6  -2  -8   10.04    1.89
   6   2   8   10.81    1.51
   2  -8   8    9.07    1.98
  -1   7  -8   54.61    3.25
  -6  -1  -8   50.45    3.44
   7  -6  -8   47.62    2.77
  -6  -1  -8   50.72    3.47
  -6  -1  -8   50.67    3.40
   6   1   8   50.61    3.11
   1  -7   8   47.25    3.53
  -7   6   8   48.69    2.32
   6  -6  -8   35.72    2.05
  -6   0  -8   38.66    2.90
  -6   0  -8   29.88    2.58
   0   6  -8   37.86    2.63
  -6   0  -8   38.20    2.83
  -6   6   8   34.10    2.02
   6   0   8   38.26    2.70
   0  -6   8   41.46    3.18
   5  -6  -8   11.96    1.07
  -6   1  -8   14.07    1.76
  -6   1  -8   11.18    1.66
   1   5  -8   12.06    1.57
  -6   1  -8   11.78    1.59
  -1  -5   8   16.95    2.05
   6  -1   8   13.78    1.52
  -5   6   8   11.93    1.20
  -1  -5   8   15.77    1.57
  -6   2  -8   22.19    2.21
   4  -6  -8   23.10    1.23
  -6   2  -8   24.88    2.17
   2   4  -8   25.03    2.13
   6  -2   8   27.42    2.31
  -2  -4   8   26.43    2.46
  -2  -4   8   26.54    1.87
   3  -6  -8   23.51    2.20
  -6   3  -8   21.23    1.99
   3   3  -8   24.38    2.09
   3   3  -8   22.50    1.62
  -6   3  -8   20.95    2.20
   3  -6  -8   19.63    1.74
   6  -3   8   24.72    2.20
  -3  -3   8   25.13    1.77
  -3  -3   8   28.49    2.58
   2  -6  -8   48.99    2.96
  -6   4  -8   52.67    3.37
   4   2  -8   50.76    2.66
   2  -6  -8   50.36    3.28
   4   2  -8   49.12    3.03
   2  -6  -8   49.26    3.11
   4   2  -8   55.66    2.67
  -6   4  -8   54.93    3.25
   6  -4   8   51.43    3.18
  -4  -2   8   51.70    2.67
  -4  -2   8   45.85    3.36
   5   1  -8    0.54    0.52
   1  -6  -8    2.40    1.30
   1  -6  -8    2.57    0.41
   1  -6  -8    1.72    1.04
   1  -6  -8    2.10    1.12
   5   1  -8    3.86    1.06
   5   1  -8    3.04    0.76
  -5  -1   8    2.85    0.75
   6  -5   8    1.73    1.10
  -5  -1   8    1.13    1.21
   0  -6  -8    9.36    1.72
   0  -6  -8   11.13    1.53
   6   0  -8   10.68    1.44
   6   0  -8   11.92    1.00
   0  -6  -8   13.55    1.04
   0  -6  -8   16.00    1.86
   6  -6   8   15.72    1.87
  -6   0   8   13.57    1.29
  -6   0   8   15.81    2.12
  -1  -6  -8   24.48    2.58
  -1  -6  -8   26.52    1.65
   7  -1  -8   30.47    2.31
  -1  -6  -8   25.84    2.51
  -1  -6  -8   23.27    2.28
   6  -7   8   27.29    2.50
  -7   1   8   28.38    2.84
  -7   1   8   25.35    1.92
   1   6   8   29.08    1.51
  -2  -6  -8   11.88    2.02
  -2  -6  -8   11.28    1.95
   8  -2  -8   14.69    1.79
  -2  -6  -8   10.01    1.68
  -8   2   8   11.83    2.11
   6  -8   8   14.28    2.00
  -8   2   8   14.60    1.59
  -3  -6  -8    3.62    1.85
   9  -3  -8    6.58    1.47
  -3  -6  -8    3.59    1.61
  -3  -6  -8    1.65    1.37
   6  -9   8    1.93    1.54
   6  -9   8    6.61    1.67
  -9   3   8    3.39    1.15
  -4  -6  -8    4.58    1.99
  -4  -6  -8    2.01    1.50
  10  -4  -8    6.79    1.52
  -4  -6  -8    5.83    1.83
   6 -10   8    6.68    2.02
 -10   4   8    6.51    1.42
  -5  -6  -8    6.25    1.88
  -5  -6  -8    5.55    1.91
  -5  -6  -8    6.47    2.27
  11  -5  -8    9.86    1.89
 -11   5   8    4.02    1.50
   6 -11   8    5.69    2.17
  -6  -6  -8    2.31    1.77
  -6  -6  -8    2.42    2.08
  12  -6  -8    2.27    1.61
  -6  -6  -8    2.36    1.85
 -12   6   8   -2.66    1.47
   6 -12   8    0.29    2.24
  -7  -5  -8    0.09    1.87
  -7  -5  -8    0.32    1.83
  12  -7  -8   -0.53    1.44
  -7  -5  -8   -0.34    1.65
 -12   7   8   -1.24    1.68
   5 -12   8   -2.81    2.01
  -7  -4  -8    4.77    2.14
  -7  -4  -8    5.49    1.96
  11  -7  -8    7.61    1.67
  -7  -4  -8    7.38    2.11
   4 -11   8    7.99    2.40
 -11   7   8    7.12    1.78
  -7  -3  -8    7.49    1.99
  -7  -3  -8   11.46    2.37
  -3  10  -8   14.83    1.88
  -7  -3  -8   11.63    2.14
  10  -7  -8   12.75    1.77
 -10   7   8   13.77    1.96
   3 -10   8   12.49    2.50
  -7  -2  -8    0.84    1.66
  -2   9  -8    1.36    1.18
  -7  -2  -8    2.76    1.60
  -7  -2  -8    1.26    1.50
   9  -7  -8    0.89    1.04
   7   2   8   -0.22    1.20
   2  -9   8   -0.37    1.62
   8  -7  -8    0.35    0.92
  -7  -1  -8    1.11    1.45
  -1   8  -8    3.20    1.26
  -7  -1  -8    1.15    1.36
  -7  -1  -8   -0.30    1.38
   7   1   8    2.14    1.24
   1  -8   8   -0.55    1.55
  -7   0  -8   15.38    2.04
  -7   0  -8   15.49    2.05
   7  -7  -8   13.10    1.31
   0   7  -8   13.96    1.78
  -7   0  -8   13.02    1.95
   0  -7   8   15.31    2.31
   7   0   8   14.33    1.75
  -7   1  -8    9.66    1.68
   1   6  -8   12.18    1.66
   6  -7  -8   12.12    1.07
  -7   1  -8    8.98    1.73
  -7   1  -8   10.98    1.78
   7  -1   8   11.91    1.64
  -6   7   8   11.08    1.34
  -1  -6   8   15.69    2.25
  -1  -6   8   13.63    1.61
  -7   2  -8   11.21    1.66
   2   5  -8   11.48    1.60
   5  -7  -8    9.62    0.80
  -7   2  -8   10.19    1.77
  -7   2  -8    9.91    1.74
  -2  -5   8   12.77    1.97
   7  -2   8   10.04    1.50
  -2  -5   8   14.14    1.55
  -7   3  -8   12.17    1.89
  -7   3  -8   10.36    1.70
   3   4  -8   15.09    1.79
  -3  -4   8   12.56    1.91
   7  -3   8   10.73    1.63
  -3  -4   8   13.92    1.47
  -7   4  -8   20.99    2.32
  -7   4  -8   17.15    2.01
   3  -7  -8   18.31    2.23
   4   3  -8   22.73    2.13
   3  -7  -8   17.01    1.97
  -4  -3   8   15.26    1.52
   7  -4   8   20.12    1.97
  -4  -3   8   21.79    2.41
  -7   5  -8   15.82    1.96
   2  -7  -8   14.27    1.85
   2  -7  -8   14.93    2.03
   5   2  -8   16.96    1.88
   2  -7  -8   10.18    1.48
  -5  -2   8   12.40    2.03
   7  -5   8   14.49    1.87
  -5  -2   8   12.27    1.33
   1  -7  -8   15.85    2.14
   6   1  -8   17.89    1.88
   1  -7  -8   14.14    1.95
   1  -7  -8   14.83    1.00
   1  -7  -8   16.39    1.83
   7  -6   8   15.45    1.97
  -6  -1   8   17.34    1.56
  -6  -1   8   14.77    2.19
   0  -7  -8    3.03    1.30
   0  -7  -8    2.55    1.53
   0  -7  -8    4.91    1.50
   0  -7  -8    3.57    0.64
   7   0  -8    5.76    1.39
   7  -7   8    3.69    1.28
  -7   0   8    5.45    1.77
  -7   0   8    4.22    1.01
  -1  -7  -8    8.85    1.82
  -1  -7  -8   10.22    1.70
  -1  -7  -8   10.38    2.11
   8  -1  -8   11.72    1.70
  -8   1   8    9.04    1.34
  -8   1   8   12.85    2.21
   7  -8   8   11.52    1.82
  -2  -7  -8    7.61    1.78
   9  -2  -8    8.35    1.63
  -2  -7  -8    3.41    1.47
  -2  -7  -8    7.11    2.07
  -9   2   8    8.63    2.08
   7  -9   8    5.19    1.70
  -9   2   8    7.23    1.39
  -3  -7  -8    8.11    1.77
  -3  -7  -8    7.42    2.17
  -3  -7  -8    8.56    2.02
  10  -3  -8    5.71    1.63
 -10   3   8   10.09    2.22
 -10   3   8    8.11    1.54
   7 -10   8    6.58    1.86
  -4  -7  -8    0.75    1.74
  11  -4  -8    1.61    1.46
  -4  -7  -8   -0.73    1.36
  -4  -7  -8    3.87    2.09
   7 -11   8   -0.57    1.59
 -11   4   8   -0.53    1.90
 -11   4   8    0.67    1.27
  -5  -7  -8   -0.69    1.75
  -5  -7  -8   -2.19    1.95
  12  -5  -8    2.04    1.62
  -5  -7  -8    1.09    1.60
 -12   5   8    0.24    1.52
   7 -12   8    1.17    2.15
   7 -12   8    2.96    1.95
  -8  -4  -8    0.77    1.72
  -8  -4  -8    3.82    2.31
  12  -8  -8    3.22    1.58
  -8  -4  -8    2.53    1.89
   4 -12   8    3.26    2.28
 -12   8   8   -1.44    1.49
  -8  -3  -8    2.41    1.89
  -8  -3  -8    0.38    1.87
  11  -8  -8    1.75    1.31
  -8  -3  -8   -1.02    1.70
 -11   8   8    1.59    1.58
   3 -11   8    0.36    1.91
  -8  -2  -8   -0.34    1.66
  10  -8  -8    3.26    1.28
  -8  -2  -8   -1.93    1.56
  -8  -2  -8    3.74    1.99
   8   2   8    1.03    1.41
   2 -10   8    5.40    2.18
  -8  -1  -8   14.34    2.26
  -8  -1  -8    9.72    2.18
  -1   9  -8   18.62    2.15
  -8  -1  -8   13.74    2.21
   9  -8  -8   14.58    1.62
   1  -9   8   14.37    2.54
   8   1   8   12.29    1.85
   0   8  -8    4.04    1.33
  -8   0  -8    3.33    1.56
  -8   0  -8    1.91    1.53
  -8   0  -8    1.22    1.57
   8  -8  -8    3.80    1.03
   8   0   8    3.13    1.34
   0  -8   8    2.50    1.72
  -8   1  -8    4.24    1.60
   1   7  -8    7.62    1.54
  -8   1  -8    3.41    1.56
  -8   1  -8    3.63    1.54
   7  -8  -8    3.97    0.89
  -1  -7   8    4.50    1.36
   8  -1   8    3.56    1.27
  -1  -7   8    6.13    1.93
  -8   2  -8   26.81    2.60
   6  -8  -8   27.63    1.65
  -8   2  -8   28.33    2.66
  -8   2  -8   24.97    2.47
   2   6  -8   28.96    2.54
  -2  -6   8   27.83    2.94
   8  -2   8   30.74    2.76
  -2  -6   8   26.70    2.34
   5  -8  -8   15.49    0.99
   5  -8  -8   16.09    1.00
  -8   3  -8   14.76    2.03
  -8   3  -8   15.34    2.05
   3   5  -8   18.95    2.06
  -3  -5   8   16.77    1.75
  -3  -5   8   19.39    2.50
   8  -3   8   15.75    1.99
  -8   4  -8   16.91    2.16
  -8   4  -8   18.27    2.29
   4   4  -8   14.87    1.90
   4  -8  -8   15.21    2.23
  -4  -4   8   15.23    1.61
  -4  -4   8   13.93    2.17
   8  -4   8   15.97    2.03
  -8   5  -8   14.81    2.12
  -8   5  -8   18.43    2.36
   5   3  -8   15.80    1.92
   3  -8  -8   16.68    2.06
   3  -8  -8   15.86    2.26
  -5  -3   8   15.75    1.67
  -5  -3   8   17.92    2.34
   8  -5   8   14.96    1.89
   2  -8  -8   11.22    2.07
   6   2  -8   13.40    1.88
  -8   6  -8    9.28    1.86
   2  -8  -8   13.06    1.94
   8  -6   8    7.67    1.60
  -6  -2   8    9.26    1.28
  -6  -2   8   10.68    2.01
   7   1  -8   16.90    2.02
   1  -8  -8   19.60    2.36
   1  -8  -8   19.61    2.54
   8  -7   8   14.66    2.07
  -7  -1   8   17.05    1.66
  -7  -1   8   14.60    2.28
   0  -8  -8    6.19    1.74
   8   0  -8    5.04    1.49
   0  -8  -8    4.35    1.37
   0  -8  -8    3.40    1.76
  -8   0   8    4.99    1.16
  -8   0   8    6.46    1.96
   8  -8   8    4.57    1.55
  -1  -8  -8    5.62    1.78
  -1  -8  -8    6.43    2.11
  -1  -8  -8    6.03    1.57
   9  -1  -8    3.74    1.53
   8  -9   8    8.20    1.84
  -9   1   8    5.15    1.98
  -9   1   8    8.21    1.49
  -2  -8  -8   12.81    1.93
  -2  -8  -8   11.53    2.22
  10  -2  -8   13.22    2.01
  -2  -8  -8   15.31    2.71
 -10   2   8   16.71    1.99
   8 -10   8   19.13    2.47
 -10   2   8   16.16    2.78
  -3  -8  -8   12.83    2.10
  -3  -8  -8   12.84    2.74
  11  -3  -8   15.43    2.25
  -3  -8  -8   17.14    2.69
 -11   3   8    9.71    2.58
   8 -11   8   16.40    2.52
 -11   3   8   12.24    1.92
  12  -4  -8    2.36    1.66
  -4  -8  -8    4.24    2.05
  -4  -8  -8    2.04    1.54
  -4  -8  -8    5.05    2.35
   8 -12   8    3.86    1.93
 -12   4   8   -0.25    2.07
  12  -9  -8    3.48    1.48
  -9  -3  -8    1.83    1.89
  -9  -3  -8    2.88    2.09
  -9  -3  -8    5.56    2.43
   3 -12   8   10.75    2.82
 -12   9   8    7.77    2.01
  -9  -2  -8    2.56    1.86
  -9  -2  -8    7.41    2.45
  11  -9  -8    4.37    1.43
  -9  -2  -8    6.03    2.16
   2 -11   8    8.00    2.59
  10  -9  -8   21.22    2.00
  -9  -1  -8   15.38    2.52
  -9  -1  -8   20.65    2.63
  -9  -1  -8   22.04    2.88
   1 -10   8   21.39    3.14
   9   1   8   17.35    2.30
  -9   0  -8    9.46    2.21
  -9   0  -8    8.95    2.00
  -9   0  -8   11.27    2.17
   9  -9  -8   10.94    1.45
   0   9  -8   11.73    1.90
   9   0   8   13.09    2.01
   0  -9   8   16.36    2.76
   1   8  -8    3.70    1.41
   8  -9  -8    1.81    0.87
  -9   1  -8   -0.49    1.44
  -9   1  -8    2.14    1.59
  -9   1  -8    0.89    1.64
  -1  -8   8    4.01    2.03
   9  -1   8    5.46    1.61
  -9   2  -8   23.38    2.64
  -9   2  -8   21.74    2.57
   2   7  -8   31.08    2.80
  -9   2  -8   28.52    2.77
   7  -9  -8   26.50    1.74
  -2  -7   8   28.29    3.15
  -2  -7   8   21.51    2.31
   9  -2   8   24.66    2.52
   6  -9  -8   12.79    1.09
  -9   3  -8   13.68    2.01
  -9   3  -8   14.19    2.09
   3   6  -8   16.02    2.12
  -9   3  -8   13.98    2.09
  -3  -6   8   15.01    2.44
  -3  -6   8   11.81    1.74
   9  -3   8   12.87    1.86
   4   5  -8    5.11    1.46
  -9   4  -8    4.61    1.73
  -9   4  -8    4.92    1.70
   9  -4   8    4.12    1.43
  -4  -5   8    3.98    1.82
  -4  -5   8    4.76    1.26
  -9   5  -8    8.86    1.89
   5   4  -8    6.31    1.62
  -9   5  -8    6.04    1.83
   4  -9  -8    6.07    1.88
   9  -5   8    6.34    1.64
  -5  -4   8    6.91    1.94
  -5  -4   8    6.51    1.30
   6   3  -8    7.90    1.73
  -9   6  -8    5.77    1.74
   3  -9  -8    8.76    2.04
  -9   6  -8    4.75    1.89
  -6  -3   8    6.25    1.31
   9  -6   8    6.15    1.69
  -6  -3   8    6.70    1.99
   7   2  -8   41.10    3.17
   2  -9  -8   39.69    3.41
   2  -9  -8   41.30    3.78
  -9   7  -8   41.45    3.38
  -7  -2   8   44.98    3.92
   9  -7   8   39.34    3.43
  -7  -2   8   37.90    2.67
   8   1  -8   14.50    2.00
   1  -9  -8   11.90    2.42
   1  -9  -8   10.20    2.11
  -8  -1   8   16.14    2.68
  -8  -1   8   14.87    1.77
   9  -8   8   12.56    2.12
   0  -9  -8   -0.14    1.56
   0  -9  -8    2.47    1.95
   9   0  -8    2.76    1.61
   9  -9   8   -0.73    1.43
  -9   0   8   -0.96    1.65
  -9   0   8    0.01    1.08
  10  -1  -8   25.44    2.71
  -1  -9  -8   15.62    2.72
  -1  -9  -8   19.20    2.80
 -10   1   8   15.76    2.91
   9 -10   8   20.78    2.59
 -10   1   8   19.05    2.14
  -2  -9  -8   15.30    2.91
  11  -2  -8   14.43    2.20
  -2  -9  -8   14.01    2.59
 -11   2   8   14.15    2.11
   9 -11   8   16.83    2.49
 -11   2   8   12.72    2.81
  -3  -9  -8    4.48    2.20
  12  -3  -8    6.25    1.97
  -3  -9  -8    7.10    2.75
   9 -12   8    6.37    2.16
 -12   3   8    3.22    2.44
 -10  -1  -8    2.74    1.93
  11 -10  -8    3.00    1.33
 -10  -1  -8    4.23    1.98
 -10  -1  -8    8.02    2.31
   1 -11   8   10.25    2.84
 -10   0  -8    4.60    1.94
 -10   0  -8    6.18    2.14
 -10   0  -8    5.53    2.24
  10 -10  -8    6.45    1.36
  10   0   8    3.28    1.73
   0 -10   8    7.13    2.56
   9 -10  -8    9.92    1.34
 -10   1  -8   10.55    2.19
 -10   1  -8    8.15    2.13
   1   9  -8    7.89    1.82
 -10   1  -8    7.80    2.05
  10  -1   8    4.55    1.67
  -1  -9   8    6.76    2.44
 -10   2  -8    2.31    1.63
   8 -10  -8    1.19    0.79
   2   8  -8    5.76    1.61
 -10   2  -8    3.60    1.78
 -10   2  -8    0.65    1.70
  10  -2   8    1.80    1.43
  -2  -8   8    5.61    2.23
  -2  -8   8    3.43    1.43
   3   7  -8    8.25    1.78
 -10   3  -8    4.13    1.68
 -10   3  -8    5.14    1.82
   7 -10  -8    4.28    0.75
 -10   3  -8    3.11    1.71
  10  -3   8    4.18    1.65
  -3  -7   8    5.82    2.15
  -3  -7   8    5.37    1.47
   6 -10  -8   19.74    1.21
   4   6  -8   26.62    2.66
 -10   4  -8   19.57    2.48
 -10   4  -8   21.25    2.57
  10  -4   8   18.61    2.21
  -4  -6   8   21.61    2.21
  -4  -6   8   18.57    2.86
 -10   5  -8    4.88    1.79
 -10   5  -8    6.24    1.89
   5   5  -8    7.38    1.68
  10  -5   8    7.40    1.85
  -5  -5   8    7.49    2.11
  -5  -5   8    7.44    1.52
 -10   6  -8    5.02    1.84
   6   4  -8    8.74    1.71
 -10   6  -8    7.76    2.07
   4 -10  -8    4.65    2.09
  10  -6   8    8.35    1.88
  -6  -4   8    8.62    2.28
  -6  -4   8    6.23    1.39
 -10   7  -8   15.04    2.43
   7   3  -8   21.78    2.56
 -10   7  -8   14.48    2.56
   3 -10  -8   17.30    2.70
  -7  -3   8   15.94    1.89
  -7  -3   8   15.62    2.71
  10  -7   8   16.49    2.40
   8   2  -8   24.59    2.64
   2 -10  -8   22.97    2.95
   2 -10  -8   16.27    2.62
 -10   8  -8   21.52    2.81
  -8  -2   8   22.02    2.25
  10  -8   8   23.50    2.58
  -8  -2   8   17.95    2.95
   1 -10  -8    4.51    2.03
   9   1  -8    1.74    1.56
   1 -10  -8    2.75    1.82
  -9  -1   8   -0.70    1.15
  -9  -1   8    0.16    1.99
  10  -9   8   -1.17    1.50
  10   0  -8    6.12    1.96
   0 -10  -8    3.20    1.93
   0 -10  -8    2.30    2.19
 -10   0   8    4.26    2.15
  10 -10   8    0.09    1.73
 -10   0   8    2.33    1.38
  11  -1  -8    0.80    1.62
  -1 -10  -8   -0.62    2.06
  -1 -10  -8   -1.74    1.65
 -11   1   8    0.80    2.01
  10 -11   8   -0.61    1.77
 -11   0  -8    4.43    2.13
 -11   0  -8    3.18    1.96
  11 -11  -8    1.45    1.19
 -11   0  -8    1.38    2.15
   0 -11   8    5.01    2.60
 -11   1  -8    8.64    2.20
  10 -11  -8    8.10    1.32
 -11   1  -8    4.98    2.24
 -11   1  -8    6.60    2.20
  -1 -10   8    9.76    2.61
  11  -1   8    9.85    2.08
 -11   2  -8   -0.77    1.55
   9 -11  -8    1.08    0.91
 -11   2  -8   -0.03    1.67
 -11   2  -8   -0.34    1.65
  -2  -9   8    1.90    2.24
  11  -2   8   -0.76    1.55
  -2  -9   8   -2.21    1.40
   8 -11  -8    2.03    0.75
   3   8  -8    5.24    1.68
 -11   3  -8   -1.02    1.69
 -11   3  -8    1.21    1.67
 -11   3  -8    1.51    1.79
  11  -3   8   -0.80    1.55
  -3  -8   8    1.02    1.42
  -3  -8   8    0.95    2.18
   4   7  -8    3.11    1.63
 -11   4  -8    5.03    1.92
 -11   4  -8    2.62    1.81
 -11   4  -8    2.44    1.67
  11  -4   8    2.10    1.65
  -4  -7   8    4.01    1.56
  -4  -7   8    4.03    2.10
 -11   5  -8    1.39    1.69
   5   6  -8    5.18    1.69
 -11   5  -8    1.40    1.81
  -5  -6   8    2.40    1.34
  -5  -6   8    1.91    2.00
  11  -5   8    4.49    1.68
 -11   6  -8    4.78    1.93
   5 -11  -8    2.17    2.22
 -11   6  -8    0.37    1.79
   6   5  -8    3.20    1.52
  -6  -5   8    3.39    1.38
  -6  -5   8    1.42    1.95
  11  -6   8    1.80    1.75
   4 -11  -8    2.89    2.13
 -11   7  -8    5.95    2.18
 -11   7  -8    4.09    2.00
   7   4  -8    2.81    1.59
  11  -7   8    3.67    1.66
  -7  -4   8    5.85    1.59
  -7  -4   8    4.55    2.26
   3 -11  -8   -0.38    1.96
 -11   8  -8    0.39    1.94
   8   3  -8    1.80    1.54
 -11   8  -8    1.75    1.94
  11  -8   8    2.21    1.78
  -8  -3   8   -0.13    1.19
  -8  -3   8    1.41    2.02
 -11   9  -8    6.06    2.35
   2 -11  -8    1.89    2.04
   2 -11  -8    2.55    1.95
   9   2  -8    2.19    1.66
  -9  -2   8    3.21    2.25
  11  -9   8    5.18    2.03
  -9  -2   8    2.45    1.44
   1 -11  -8   11.05    2.51
  10   1  -8    6.31    2.00
   1 -11  -8   10.78    2.66
 -10  -1   8   10.89    2.78
 -10  -1   8    6.31    2.09
  11 -10   8    3.00    2.00
  11   0  -8    0.98    1.83
   0 -11  -8    1.98    2.14
   0 -11  -8    3.37    2.47
  11 -11   8    1.23    1.96
 -11   0   8    1.60    2.32
 -12   3  -8    7.11    2.32
 -12   3  -8    6.35    2.18
 -12   3  -8   10.61    2.28
  12  -3   8    4.96    2.05
  -3  -9   8    7.00    2.72
  -3  -9   8    7.05    2.02
 -12   4  -8   -1.84    1.80
 -12   4  -8   -0.93    1.86
 -12   4  -8    1.49    1.84
  -4  -8   8    0.85    1.55
  -4  -8   8    2.44    2.30
  12  -4   8    0.56    1.83
 -12   5  -8    0.25    1.89
 -12   5  -8   -1.43    1.71
 -12   5  -8   -1.03    1.82
   5   7  -8    1.67    1.57
  -5  -7   8   -1.93    1.92
  -5  -7   8    1.31    1.43
  12  -5   8   -3.94    1.33
   6   6  -8    2.50    1.69
 -12   6  -8    2.35    2.17
 -12   6  -8    1.04    1.94
  -6  -6   8    3.11    1.59
  -6  -6   8    6.36    2.44
  12  -6   8    1.59    1.64
 -12   7  -8   11.59    2.55
   5 -12  -8    8.96    2.67
 -12   7  -8   12.73    2.64
   7   5  -8   12.00    2.25
  12  -7   8   10.98    2.35
  -7  -5   8   11.11    2.78
  -7  -5   8   13.32    2.14
 -12   8  -8   -0.55    2.05
   8   4  -8    3.77    1.66
 -12   8  -8    3.33    2.14
   4 -12  -8    0.57    2.36
  -8  -4   8    0.20    1.33
  12  -8   8   -0.81    1.76
  -8  -4   8    1.33    2.35
   3 -12  -8    0.89    2.26
   9   3  -8   -1.60    1.44
 -12   9  -8   -2.48    2.01
 -12   9  -8    1.17    2.25
  -9  -3   8    1.51    2.28
  -9  -3   8    0.11    1.71
  12  -9   8    0.16    1.81
   0   0  -9   46.41    2.61
   0   0  -9   43.65    2.45
   0   0  -9   45.52    2.11
   0   0   9   39.25    1.73
   0   0   9   33.48    2.18
  -1   0  -9   63.53    2.94
   1  -1  -9   61.29    3.02
   0   1  -9   66.21    2.77
   0   1  -9   59.43    3.13
  -1   0  -9   60.27    3.07
  -1   0  -9   61.64    3.34
   1  -1  -9   60.51    2.70
   1  -1  -9   64.53    3.15
   1   0   9   60.94    3.00
  -1   1   9   59.35    2.57
   0  -1   9   59.84    2.76
   1   0   9   57.12    2.77
  -1   1   9   61.04    2.85
  -1   1  -9   20.87    1.61
   0  -1  -9   21.02    1.48
   1   0  -9   19.32    1.55
   0  -1  -9   23.81    1.79
   1   0  -9   23.19    1.69
  -1   1  -9   22.56    1.42
   0  -1  -9   22.38    1.36
   0   1   9   14.69    1.09
  -1   0   9   18.91    1.28
   0   1   9   16.72    1.22
   0   1   9   17.80    1.01
  -1   2  -9    5.70    0.76
  -1  -1  -9    5.32    1.09
   2  -1  -9    7.10    0.93
  -1   2  -9    5.64    1.02
  -1  -1  -9    4.62    0.83
   2  -1  -9    5.23    0.85
   1   1   9    5.56    0.76
   1  -2   9    5.63    0.74
   1   1   9    3.98    0.47
   1   1   9    5.86    0.79
   3  -2  -9   11.00    0.96
  -2  -1  -9    9.49    1.19
   3  -2  -9   10.02    1.06
  -2  -1  -9   14.42    1.51
  -1   3  -9   13.45    1.45
  -1   3  -9   15.03    1.27
  -2  -1  -9    9.85    0.92
   2   1   9   11.51    1.14
  -3   2   9   12.38    0.79
   1  -3   9   11.89    1.20
   2   1   9   10.45    1.04
  -2   0  -9   21.09    1.94
  -2   0  -9   27.59    1.74
   0   2  -9   24.56    1.40
   2  -2  -9   24.43    1.62
   0   2  -9   20.38    1.73
   2  -2  -9   23.71    1.56
   0   2  -9   23.95    1.57
   2   0   9   21.21    1.62
   2   0   9   19.67    1.51
   0  -2   9   25.02    1.63
  -2   2   9   22.11    1.33
  -2   2   9   23.55    1.21
   1  -2  -9   11.40    0.98
  -2   1  -9   12.80    1.52
   1   1  -9   13.24    1.29
  -2   1  -9   10.74    1.13
   1   1  -9   10.74    0.70
  -2   1  -9   11.93    1.15
   1  -2  -9   11.10    0.99
   1  -2  -9   14.70    1.30
  -1  -1   9   10.28    1.13
  -1   2   9   11.59    1.17
   2  -1   9   11.45    1.28
  -1   2   9   12.03    0.95
  -1   2   9   11.55    1.05
  -1   2   9   11.07    0.95
   2   0  -9    2.63    0.77
   0  -2  -9    1.38    0.92
  -2   2  -9    1.36    0.73
   0  -2  -9    0.59    0.64
  -2   2  -9    1.41    0.70
   0  -2  -9    1.97    0.57
  -2   2  -9    1.84    0.49
   0   2   9    0.73    0.56
   0   2   9    2.09    0.51
   0   2   9    2.56    0.61
  -2   0   9    2.26    0.80
   0   2   9    2.35    0.51
   0   2   9    2.52    1.41
   3  -1  -9   29.06    1.88
   3  -1  -9   29.50    1.69
  -2   3  -9   28.79    2.06
  -1  -2  -9   29.17    1.95
  -2   3  -9   29.93    1.78
  -1  -2  -9   32.42    2.16
  -1  -2  -9   28.08    1.72
   1   2   9   27.07    1.52
   1   2   9   25.11    1.66
   2  -3   9   27.93    1.65
   1   2   9   23.44    1.51
   1   2   9   25.72    1.67
  -2   4  -9    8.62    1.25
   4  -2  -9    7.41    0.65
  -2  -2  -9    6.23    1.21
  -2  -2  -9    7.25    0.97
  -2  -2  -9    7.79    1.02
   4  -2  -9    7.13    1.00
  -2  -2  -9    7.20    1.14
   2  -4   9    7.60    1.07
   2   2   9    6.95    0.83
   2   2   9    5.71    0.85
  -4   2   9    7.68    0.65
  -3  -2  -9    1.75    0.73
  -2   5  -9    2.00    0.93
  -3  -2  -9    2.04    1.03
  -3  -2  -9    2.57    1.14
   5  -3  -9    2.55    0.77
  -3  -2  -9    1.85    0.90
   3   2   9    1.07    0.69
   2  -5   9    1.72    0.94
   3   2   9    2.46    0.83
  -1   4  -9   32.42    1.86
   4  -3  -9   31.26    1.57
  -3  -1  -9   28.26    1.95
  -3  -1  -9   28.49    2.13
  -1   4  -9   34.81    2.11
  -3  -1  -9   26.73    1.83
   4  -3  -9   26.65    1.77
  -3  -1  -9   27.32    2.23
  -1   4  -9   29.81    2.15
   1  -4   9   31.16    2.13
   3   1   9   32.33    1.97
  -4   3   9   28.35    1.66
   3  -3  -9   48.20    2.46
   0   3  -9   51.90    2.87
  -3   0  -9   49.58    3.00
   0   3  -9   48.68    2.49
  -3   0  -9   49.91    2.45
  -3   0  -9   50.48    2.79
   3  -3  -9   54.69    2.50
  -3   3   9   48.60    2.32
  -3   3   9   52.77    2.40
   0  -3   9   52.27    2.87
  -3   3   9   44.70    2.69
  -3   3   9   51.08    2.55
   3   0   9   51.45    2.75
  -3   1  -9   11.86    0.87
   2  -3  -9   11.12    1.06
   2  -3  -9   11.94    1.03
  -3   1  -9   11.21    1.27
   1   2  -9   11.63    1.29
  -3   1  -9   12.66    0.96
   1   2  -9   13.20    0.97
   2  -3  -9   15.28    1.26
  -3   1  -9   13.59    1.62
  -2   3   9   12.45    1.08
   3  -1   9   13.94    1.39
  -1  -2   9   14.89    1.41
  -2   3   9   12.49    1.25
  -2   3   9   12.77    0.83
  -2   3   9   14.25    1.30
   1  -3  -9   30.96    1.92
   1  -3  -9   32.08    2.05
  -3   2  -9   34.27    1.67
   2   1  -9   31.09    2.10
  -3   2  -9   31.69    2.05
   1  -3  -9   30.25    1.67
  -3   2  -9   31.27    2.45
   2   1  -9   31.23    1.45
  -1   3   9   32.07    2.00
  -1   3   9   31.66    1.81
  -1   3   9   33.20    1.47
  -1   3   9   30.31    1.93
  -2  -1   9   36.02    2.18
  -1   3   9   29.00    1.47
   3  -2   9   32.06    2.23
   0  -3  -9   73.57    3.55
   0  -3  -9   68.68    3.58
   0  -3  -9   67.81    3.44
  -3   3  -9   69.59    3.61
   3   0  -9   70.60    3.56
  -3   3  -9   77.42    3.39
   0   3   9   72.18    3.02
   0   3   9   67.37    3.38
  -3   0   9   71.27    3.64
   0   3   9   69.80    3.38
   0   3   9   68.38    3.05
  -1  -3  -9   38.61    2.46
  -3   4  -9   35.46    2.37
  -3   4  -9   35.82    2.18
  -1  -3  -9   40.22    2.32
  -1  -3  -9   36.47    2.37
   4  -1  -9   36.69    1.85
  -1  -3  -9   36.42    1.99
   4  -1  -9   38.70    2.26
   1   3   9   38.51    1.88
   3  -4   9   37.41    2.22
  -4   1   9   38.39    1.75
   1   3   9   37.00    2.25
  -3   5  -9    7.73    1.24
  -2  -3  -9    5.53    0.83
  -2  -3  -9    7.49    1.33
  -3   5  -9    7.44    1.21
  -2  -3  -9    6.95    1.29
   5  -2  -9    6.15    1.01
  -2  -3  -9    7.45    1.17
   2   3   9    5.99    1.00
   2   3   9    4.46    0.73
   3  -5   9    5.40    1.09
  -5   2   9    6.52    0.71
  -3  -3  -9    7.21    1.38
  -3  -3  -9    4.37    0.86
  -3  -3  -9    3.30    1.28
  -3   6  -9    6.40    1.30
  -3  -3  -9    4.42    1.18
   6  -3  -9    4.94    0.93
   3  -6   9    5.52    1.30
   3   3   9    4.95    0.84
  -6   3   9    5.62    0.87
   7  -4  -9   33.97    2.34
  -3   7  -9   37.91    2.70
  -4  -3  -9   36.12    2.80
  -4  -3  -9   29.97    2.14
  -4  -3  -9   33.58    2.73
  -4  -3  -9   36.19    2.90
   3  -7   9   40.27    2.99
  -7   4   9   35.06    2.29
   4   3   9   35.01    2.36
  -4  -2  -9    4.48    1.17
   6  -4  -9    4.69    0.92
  -4  -2  -9    5.77    1.35
  -2   6  -9    3.94    1.08
  -4  -2  -9    2.13    0.73
  -4  -2  -9    4.00    1.36
   2  -6   9    3.55    1.24
   4   2   9    4.96    0.97
  -4  -1  -9   16.59    1.86
   5  -4  -9   15.93    1.38
  -4  -1  -9   14.58    1.71
  -4  -1  -9   15.88    1.57
  -1   5  -9   21.69    1.92
   4   1   9   17.10    1.52
   1  -5   9   18.66    1.89
  -5   4   9   18.28    1.46
  -4   0  -9   95.65    4.55
   4  -4  -9  104.31    4.36
  -4   0  -9  102.89    4.86
   0   4  -9   96.01    4.81
   0   4  -9  102.79    4.54
   4  -4  -9   93.00    4.34
  -4   0  -9   95.19    4.93
  -4   4   9  100.52    4.53
   0  -4   9  103.70    5.07
  -4   4   9  103.71    4.60
   4   0   9   99.44    4.82
   1   3  -9   50.99    2.46
  -4   1  -9   54.76    2.92
  -4   1  -9   47.45    3.05
   3  -4  -9   48.35    2.35
   1   3  -9   45.43    2.82
   3  -4  -9   49.62    2.54
  -4   1  -9   49.08    2.53
  -3   4   9   43.15    2.88
   4  -1   9   45.06    2.77
  -3   4   9   47.32    2.49
  -1  -3   9   47.50    2.86
  -3   4   9   49.05    2.46
  -3   4   9   47.64    2.01
   2   2  -9   25.67    1.46
   2  -4  -9   24.57    1.38
   2  -4  -9   28.81    1.84
   2   2  -9   28.88    2.03
  -4   2  -9   27.41    2.06
  -4   2  -9   25.62    2.26
  -4   2  -9   26.71    1.57
   2  -4  -9   26.37    1.82
  -2   4   9   29.81    2.02
   4  -2   9   29.22    2.16
  -2   4   9   31.70    2.12
  -2   4   9   29.93    1.84
  -2  -2   9   27.95    2.10
   3   1  -9   22.53    1.92
  -4   3  -9   28.33    1.63
   1  -4  -9   23.33    1.81
  -4   3  -9   28.52    2.03
   1  -4  -9   23.28    1.85
   1  -4  -9   24.65    1.91
   3   1  -9   25.41    1.36
  -3  -1   9   24.41    1.30
  -3  -1   9   23.43    2.00
   4  -3   9   24.65    2.04
  -1   4   9   22.51    1.66
  -1   4   9   21.46    1.73
   0  -4  -9  126.26    5.95
   4   0  -9  126.79    5.92
   0  -4  -9  131.87    5.98
   0  -4  -9  129.32    5.93
  -4   0   9  123.14    5.30
  -4   0   9  132.55    6.04
   0   4   9  121.19    5.78
   4  -4   9  128.26    6.02
  -1  -4  -9   40.07    2.67
   5  -1  -9   39.63    1.86
  -4   5  -9   46.51    2.55
   5  -1  -9   42.54    2.53
  -1  -4  -9   39.23    2.63
  -1  -4  -9   40.96    2.12
   5  -1  -9   39.75    1.80
  -1  -4  -9   36.84    2.60
   1   4   9   37.01    2.54
  -5   1   9   44.24    2.90
   4  -5   9   44.82    2.67
  -5   1   9   43.49    2.13
   1   4   9   45.25    2.06
  -2  -4  -9    1.93    1.09
  -2  -4  -9    2.67    0.66
   6  -2  -9    0.56    0.80
  -2  -4  -9    0.34    1.03
  -2  -4  -9    1.01    1.11
  -4   6  -9    1.87    0.99
   4  -6   9    1.01    1.01
   2   4   9    1.82    0.62
  -6   2   9    1.58    0.65
  -3  -4  -9   13.77    1.80
  -3  -4  -9   14.73    1.90
  -4   7  -9   16.28    1.75
   7  -3  -9   14.62    1.63
  -3  -4  -9   13.06    1.31
  -3  -4  -9   11.53    1.83
   3   4   9   15.05    1.34
   4  -7   9   13.60    1.85
  -7   3   9   16.00    1.42
  -4  -4  -9    5.26    1.57
   8  -4  -9    6.36    1.28
  -4   8  -9    4.48    1.30
  -4  -4  -9    4.59    1.52
  -4  -4  -9    2.95    1.38
   4  -8   9    4.12    1.59
   4   4   9    5.88    1.11
  -8   4   9    4.78    1.15
   9  -5  -9   11.18    1.62
  -4   9  -9   12.97    1.76
  -5  -4  -9   10.76    1.95
  -5  -4  -9    8.94    1.98
  -5  -4  -9   10.12    1.85
  -9   5   9   13.31    1.65
   4  -9   9   10.29    2.06
  -3   8  -9   36.01    2.77
  -5  -3  -9   34.21    3.01
   8  -5  -9   31.12    2.42
  -5  -3  -9   37.53    3.00
  -5  -3  -9   33.62    2.91
   3  -8   9   40.26    3.19
   5   3   9   34.67    2.55
  -8   5   9   36.11    2.53
  -5  -2  -9   15.84    1.98
  -5  -2  -9   13.07    1.81
   7  -5  -9   11.70    1.31
  -5  -2  -9    9.36    1.41
  -5  -2  -9   14.82    1.92
  -2   7  -9   13.61    1.70
   2  -7   9   13.17    1.94
   5   2   9   10.90    1.44
  -5  -1  -9    1.45    1.20
  -5  -1  -9    0.14    1.07
  -5  -1  -9    0.47    1.07
   6  -5  -9    0.57    0.67
  -1   6  -9    0.05    0.85
   5   1   9    0.65    0.93
   1  -6   9    0.62    1.22
  -6   5   9    0.83    0.50
  -5   0  -9   50.46    3.24
   0   5  -9   49.46    3.04
   5  -5  -9   51.17    2.51
  -5   0  -9   49.84    2.96
  -5   0  -9   48.77    3.16
   0  -5   9   51.30    3.41
  -5   5   9   52.20    2.61
  -5   5   9   49.37    2.83
   5   0   9   58.44    3.13
   1   4  -9   21.83    1.54
   4  -5  -9   19.21    1.50
   4  -5  -9   19.23    1.26
  -5   1  -9   19.44    1.72
   1   4  -9   21.36    1.93
  -5   1  -9   20.95    2.07
  -5   1  -9   19.33    1.90
  -1  -4   9   24.53    2.19
  -4   5   9   21.55    1.57
  -4   5   9   18.56    1.61
   5  -1   9   18.64    1.72
  -5   2  -9   16.15    1.72
   3  -5  -9   15.04    0.96
  -5   2  -9   13.48    1.78
   2   3  -9   16.00    1.24
   2   3  -9   23.61    2.02
   3  -5  -9   17.03    1.51
   5  -2   9   14.71    1.56
  -2  -3   9   18.24    1.40
  -2  -3   9   18.34    1.88
   3   2  -9   17.01    1.64
   2  -5  -9   16.24    1.71
  -5   3  -9   16.97    1.35
  -5   3  -9   17.70    2.01
   2  -5  -9   18.26    1.69
   3   2  -9   18.07    1.23
   2  -5  -9   17.18    1.60
  -5   3  -9   16.73    1.71
  -3  -2   9   23.40    2.16
  -3  -2   9   20.49    1.38
   5  -3   9   17.91    1.77
   1  -5  -9   23.28    1.98
   4   1  -9   24.92    1.97
   1  -5  -9   22.42    1.97
   4   1  -9   24.02    1.45
  -5   4  -9   19.70    1.62
   1  -5  -9   26.53    2.12
  -4  -1   9   27.23    1.58
   5  -4   9   28.10    2.28
  -4  -1   9   25.21    2.34
   0  -5  -9   16.88    1.74
   5   0  -9   16.68    1.12
   5   0  -9   19.92    1.80
   0  -5  -9   17.61    1.81
   0  -5  -9   20.78    1.96
   0  -5  -9   15.36    1.12
  -5   0   9   17.47    2.03
   5  -5   9   20.41    2.07
  -5   0   9   17.84    1.29
  -1  -5  -9    2.10    1.16
   6  -1  -9    3.38    1.00
  -1  -5  -9    1.60    1.15
  -1  -5  -9    1.79    0.58
  -1  -5  -9    3.79    1.26
   5  -6   9    1.35    1.23
   1   5   9    2.88    0.50
  -6   1   9    2.78    1.40
  -6   1   9    2.19    0.70
  -2  -5  -9   12.49    1.86
  -2  -5  -9   10.15    1.82
  -2  -5  -9   11.79    1.73
  -2  -5  -9   10.75    1.14
   7  -2  -9   15.30    1.66
   2   5   9   11.55    1.08
  -7   2   9   14.11    1.32
   5  -7   9   16.33    1.93
  -7   2   9   13.86    2.10
  -3  -5  -9    5.59    1.67
   8  -3  -9    8.22    1.40
  -3  -5  -9    6.40    1.46
  -3  -5  -9    6.35    1.69
  -8   3   9    5.17    1.12
   5  -8   9    7.60    1.69
  -4  -5  -9    5.84    1.68
   9  -4  -9    2.93    1.22
  -4  -5  -9    6.25    1.74
  -4  -5  -9    4.47    1.78
   5  -9   9    5.67    1.65
  -9   4   9    4.82    1.20
  10  -5  -9    6.81    1.58
  -5  -5  -9    6.43    2.04
  -5  -5  -9    7.35    1.83
  -5  -5  -9    7.65    1.88
   5 -10   9    8.62    2.09
 -10   5   9    9.38    1.58
  -6  -5  -9    4.44    1.94
  11  -6  -9    3.25    1.49
  -6  -5  -9    0.69    1.84
  -6  -5  -9    1.67    1.72
   5 -11   9    3.38    2.12
 -11   6   9    6.21    1.67
  -6  -4  -9    3.39    1.73
  -4  10  -9   -0.12    1.09
  -6  -4  -9    0.33    1.51
  -6  -4  -9    0.87    1.66
  10  -6  -9    0.68    1.22
 -10   6   9    0.68    1.19
   4 -10   9   -0.01    1.73
   9  -6  -9    3.55    1.24
  -6  -3  -9    4.09    1.68
  -3   9  -9    6.02    1.48
  -6  -3  -9    1.89    1.56
  -6  -3  -9    2.78    1.49
   3  -9   9    4.80    1.76
   6   3   9    3.80    1.40
  -9   6   9    5.41    1.36
  -6  -2  -9    4.98    1.57
  -6  -2  -9    5.27    1.68
  -2   8  -9    6.41    1.40
   8  -6  -9    6.16    1.20
  -6  -2  -9    6.32    1.70
   6   2   9    4.74    1.23
   2  -8   9    7.24    1.88
  -6  -1  -9    2.74    1.44
  -6  -1  -9    4.13    1.48
   7  -6  -9    5.62    0.98
  -1   7  -9    5.71    1.34
  -6  -1  -9    4.89    1.54
   1  -7   9    7.30    1.78
   6   1   9    7.05    1.30
   6  -6  -9    4.93    0.83
  -6   0  -9    7.89    1.65
  -6   0  -9    3.55    1.30
  -6   0  -9    3.27    1.34
   0   6  -9    4.09    1.17
   6   0   9    3.64    1.15
  -6   6   9    3.94    0.77
   0  -6   9    4.19    1.48
  -6   1  -9    3.26    1.18
   5  -6  -9    3.80    0.65
  -6   1  -9    2.79    1.27
  -6   1  -9    2.75    1.35
   1   5  -9    4.34    1.12
  -5   6   9    4.50    0.88
  -1  -5   9    5.00    1.46
   6  -1   9    4.63    1.24
   2   4  -9   25.93    2.24
  -6   2  -9   25.26    2.08
  -6   2  -9   23.59    2.18
  -6   2  -9   26.90    2.41
   4  -6  -9   22.70    1.26
  -2  -4   9   20.49    2.26
  -2  -4   9   25.70    1.80
   6  -2   9   21.81    2.00
   3   3  -9    5.76    0.87
   3  -6  -9    3.14    1.00
  -6   3  -9    4.16    1.47
  -6   3  -9    3.77    1.29
   3   3  -9    5.19    1.25
   6  -3   9    3.05    1.14
  -3  -3   9    3.87    1.40
  -3  -3   9    4.31    0.83
   4   2  -9   15.60    1.69
   2  -6  -9   16.31    1.86
   2  -6  -9   15.74    1.70
  -6   4  -9   14.20    2.01
   2  -6  -9   12.89    1.55
  -6   4  -9   12.68    1.66
  -4  -2   9   15.85    2.05
   6  -4   9   11.33    1.53
  -4  -2   9   14.84    1.25
   1  -6  -9   10.74    1.61
   1  -6  -9   10.30    1.49
   1  -6  -9    6.98    1.52
   5   1  -9   13.43    1.70
  -5  -1   9    8.94    1.68
   6  -5   9   11.07    1.62
  -5  -1   9   10.06    1.03
   0  -6  -9    4.35    1.30
   6   0  -9    7.33    1.40
   0  -6  -9    4.68    0.65
   6   0  -9    5.31    0.67
   0  -6  -9    4.32    1.46
   0  -6  -9    4.03    1.34
  -6   0   9    7.85    1.67
   6  -6   9    4.31    1.34
  -6   0   9    6.52    0.94
  -1  -6  -9   16.22    2.07
  -1  -6  -9   14.07    1.85
  -1  -6  -9   16.31    1.32
   7  -1  -9   17.55    1.86
  -1  -6  -9   14.87    2.07
  -7   1   9   12.69    2.10
   6  -7   9   17.65    2.07
  -7   1   9   17.86    1.51
  -2  -6  -9    2.03    1.34
  -2  -6  -9    3.64    1.58
  -2  -6  -9    4.85    1.61
   8  -2  -9    3.04    1.22
  -8   2   9    1.74    1.63
   6  -8   9    2.38    1.43
  -8   2   9    2.55    0.96
  -3  -6  -9    5.85    1.77
   9  -3  -9    3.39    1.32
  -3  -6  -9    1.94    1.68
  -3  -6  -9    3.58    1.47
  -9   3   9    4.09    1.18
  -9   3   9    2.43    1.73
   6  -9   9    6.41    1.78
   6  -9   9    2.44    1.61
  -4  -6  -9    0.79    1.54
  -4  -6  -9    2.10    1.58
  -4  -6  -9    4.09    1.76
  10  -4  -9    7.77    1.64
   6 -10   9    1.86    1.71
 -10   4   9    3.82    1.30
  11  -5  -9   19.81    2.36
  -5  -6  -9   12.77    2.35
  -5  -6  -9   18.46    2.92
  -5  -6  -9   21.94    2.83
 -11   5   9   17.51    2.14
   6 -11   9   18.03    2.79
  -6  -6  -9    4.77    2.17
  12  -6  -9    8.63    1.90
  -6  -6  -9   14.35    2.92
  -6  -6  -9    5.19    2.07
   6 -12   9    5.13    2.39
  -7  -5  -9    2.55    2.10
  -7  -5  -9    1.26    2.05
  -7  -5  -9    2.59    1.89
  12  -7  -9    4.61    1.70
   5 -12   9    6.46    2.37
  -7  -4  -9    5.50    2.03
  -7  -4  -9    6.31    2.00
  11  -7  -9    6.32    1.64
  -7  -4  -9    6.19    2.19
 -11   7   9    8.43    1.81
   4 -11   9    7.89    2.32
  -7  -3  -9    4.55    1.91
  -3  10  -9    3.31    1.38
  10  -7  -9    5.49    1.39
  -7  -3  -9    6.29    1.92
  -7  -3  -9    5.01    1.96
 -10   7   9    5.78    1.53
   3 -10   9    7.16    2.23
  -7  -2  -9    4.88    1.79
   9  -7  -9    6.67    1.35
  -7  -2  -9    7.52    1.88
  -2   9  -9    8.22    1.59
  -7  -2  -9    7.88    1.95
   7   2   9    7.43    1.56
   2  -9   9    8.86    2.19
  -7  -1  -9   15.24    2.16
  -7  -1  -9   15.08    2.11
  -7  -1  -9   12.79    2.11
   8  -7  -9   16.77    1.57
  -1   8  -9   17.25    2.05
   1  -8   9   19.21    2.59
   7   1   9   14.21    1.81
  -7   0  -9   34.74    3.02
  -7   0  -9   32.56    2.98
   0   7  -9   32.86    2.75
   7  -7  -9   37.26    2.18
  -7   0  -9   36.19    2.99
   7   0   9   37.07    2.88
   0  -7   9   38.15    3.48
  -7   1  -9   22.40    2.41
   6  -7  -9   26.72    1.65
   1   6  -9   28.47    2.55
  -7   1  -9   26.92    2.48
  -7   1  -9   27.71    2.59
  -1  -6   9   30.49    2.91
   7  -1   9   24.55    2.25
  -6   7   9   27.68    2.24
  -7   2  -9   16.83    1.89
  -7   2  -9   20.22    2.16
  -7   2  -9   21.65    2.25
   5  -7  -9   14.98    1.08
   2   5  -9   20.23    2.15
   7  -2   9   14.18    1.76
  -2  -5   9   18.38    1.75
  -2  -5   9   18.48    2.32
   3   4  -9   25.12    2.32
  -7   3  -9   21.92    2.37
  -7   3  -9   20.42    2.24
  -3  -4   9   22.58    1.82
   7  -3   9   20.55    2.16
  -3  -4   9   24.54    2.51
  -7   4  -9   41.82    3.25
  -7   4  -9   43.71    3.13
   4   3  -9   41.62    2.99
   3  -7  -9   42.49    2.93
   3  -7  -9   45.16    3.27
  -4  -3   9   37.24    2.42
   7  -4   9   43.75    3.13
  -4  -3   9   46.87    3.32
   2  -7  -9   22.73    2.43
   5   2  -9   26.63    2.33
  -7   5  -9   20.89    2.23
   2  -7  -9   24.00    2.28
   2  -7  -9   21.04    2.08
   7  -5   9   22.28    2.29
  -5  -2   9   22.20    1.74
  -5  -2   9   25.57    2.64
   1  -7  -9   11.40    1.80
   1  -7  -9    9.78    0.79
   1  -7  -9    9.90    1.59
   6   1  -9   12.20    1.51
   1  -7  -9   10.29    1.88
  -6  -1   9    9.23    1.85
   7  -6   9    8.58    1.62
  -6  -1   9   11.09    1.23
   7   0  -9   30.51    2.60
   0  -7  -9   28.20    2.58
   0  -7  -9   33.88    2.88
   0  -7  -9   29.37    2.84
  -7   0   9   29.85    2.98
  -7   0   9   28.52    2.08
   7  -7   9   34.00    2.89
  -1  -7  -9   21.51    2.59
  -1  -7  -9   18.72    2.24
  -1  -7  -9   22.72    2.50
   8  -1  -9   22.76    2.27
  -8   1   9   24.35    2.84
   7  -8   9   21.62    2.47
  -8   1   9   22.02    1.88
  -2  -7  -9   11.82    2.06
  -2  -7  -9   14.06    2.33
   9  -2  -9   15.51    2.01
  -2  -7  -9   10.20    1.90
   7  -9   9   13.47    2.12
  -9   2   9    9.42    1.44
  -9   2   9   12.11    2.41
  -3  -7  -9    1.79    1.67
  -3  -7  -9    2.66    1.75
  -3  -7  -9    1.24    1.44
  10  -3  -9    2.57    1.44
 -10   3   9    2.60    1.22
   7 -10   9    3.47    1.73
 -10   3   9    1.04    1.84
  -4  -7  -9   14.05    2.27
  -4  -7  -9   17.69    2.81
  -4  -7  -9   13.54    2.48
  11  -4  -9   16.57    2.33
 -11   4   9   19.40    2.25
   7 -11   9   18.56    2.62
 -11   4   9   10.77    2.67
  -5  -7  -9   16.44    2.72
  -5  -7  -9   11.11    2.79
  12  -5  -9   16.69    2.39
  -5  -7  -9    9.78    2.27
   7 -12   9   12.78    2.47
  -8  -4  -9    8.84    2.34
  -8  -4  -9    6.14    2.31
  12  -8  -9    6.30    1.77
  -8  -4  -9    5.46    2.22
   4 -12   9    9.85    2.60
 -12   8   9    4.81    2.71
  -8  -3  -9   21.40    3.02
  -8  -3  -9   26.08    3.09
  -8  -3  -9   21.60    3.05
  11  -8  -9   30.34    2.69
 -11   8   9   23.06    2.54
   3 -11   9   23.89    3.23
  10  -8  -9   12.06    1.67
  -8  -2  -9   10.39    2.17
  -8  -2  -9   10.85    2.27
  -8  -2  -9   13.80    2.33
  -2  10  -9   11.92    2.02
   2 -10   9   13.28    2.61
  -8  -1  -9    6.10    1.90
  -1   9  -9    4.10    1.44
  -8  -1  -9    5.34    1.89
  -8  -1  -9    4.88    1.74
   9  -8  -9    5.91    1.22
   1  -9   9    5.01    2.02
   8   1   9    3.80    1.41
  -8   0  -9   31.96    3.06
   8  -8  -9   33.19    2.21
   0   8  -9   35.27    2.87
  -8   0  -9   30.42    2.99
  -8   0  -9   29.31    3.03
   0  -8   9   34.54    3.36
   8   0   9   29.57    2.64
  -8   1  -9   22.36    2.53
  -8   1  -9   18.73    2.34
   7  -8  -9   21.60    1.63
  -8   1  -9   22.48    2.41
   1   7  -9   24.66    2.38
   8  -1   9   17.52    1.99
  -1  -7   9   23.44    2.80
  -8   2  -9    3.37    1.45
   6  -8  -9    3.27    0.61
   2   6  -9    2.06    1.26
  -8   2  -9    2.24    1.52
  -8   2  -9    3.46    1.54
  -2  -6   9    3.54    1.18
  -2  -6   9    3.22    1.69
   8  -2   9    1.93    1.28
  -8   3  -9   17.24    2.26
  -8   3  -9   14.07    1.98
   3   5  -9   17.00    2.02
  -3  -5   9   19.27    1.88
  -3  -5   9   19.71    2.50
   8  -3   9   18.94    2.18
  -8   4  -9   16.03    2.25
  -8   4  -9   13.94    2.06
   4   4  -9   18.88    2.21
  -4  -4   9   18.85    1.76
   8  -4   9   13.58    1.94
  -4  -4   9   18.72    2.37
  -8   5  -9   14.48    2.30
  -8   5  -9   16.33    2.15
   3  -8  -9   19.99    2.43
   3  -8  -9   15.17    2.05
   5   3  -9   19.08    2.08
  -5  -3   9   16.82    1.63
  -5  -3   9   18.19    2.41
   8  -5   9   17.13    2.15
  -8   6  -9    1.62    1.45
   2  -8  -9   -1.85    1.16
   6   2  -9    1.02    1.26
   2  -8  -9    0.12    1.53
   8  -6   9    2.18    1.33
  -6  -2   9    1.05    0.87
  -6  -2   9    0.41    1.56
   1  -8  -9    2.17    1.72
   1  -8  -9    3.86    1.35
   7   1  -9    7.97    1.59
   1  -8  -9    3.45    1.57
  -7  -1   9    6.37    1.89
   8  -7   9    6.80    1.67
  -7  -1   9    5.70    1.08
   0  -8  -9   27.58    3.06
   0  -8  -9   27.57    2.62
   0  -8  -9   26.13    2.82
   8   0  -9   31.08    2.76
  -8   0   9   28.33    3.14
   8  -8   9   30.46    2.88
  -8   0   9   28.41    2.24
  -1  -8  -9   18.14    2.67
  -1  -8  -9   14.41    2.11
   9  -1  -9   18.64    2.30
  -1  -8  -9   18.96    2.52
  -9   1   9   18.10    1.83
   8  -9   9   16.35    2.22
  -9   1   9   16.57    2.74
  10  -2  -9    3.49    1.60
  -2  -8  -9    2.77    1.48
  -2  -8  -9    6.35    2.15
  -2  -8  -9    4.29    1.85
   8 -10   9    1.87    1.68
 -10   2   9    2.71    2.11
 -10   2   9    4.83    1.37
  -3  -8  -9    7.47    1.82
  -3  -8  -9    3.73    2.01
  11  -3  -9    3.04    1.58
  -3  -8  -9    2.41    2.14
   8 -11   9    6.35    2.10
 -11   3   9    6.31    2.32
  12  -4  -9   14.12    2.26
  -4  -8  -9   14.45    2.93
  -4  -8  -9   12.26    2.28
  -4  -8  -9   15.73    2.76
 -12   4   9   16.92    3.15
   8 -12   9   17.87    2.70
  12  -9  -9   11.19    1.83
  -9  -3  -9    3.21    2.23
  -9  -3  -9    9.85    2.42
  -9  -3  -9    9.42    2.58
   3 -12   9    5.71    2.58
 -12   9   9    8.16    2.15
  -9  -2  -9    1.98    1.87
  -9  -2  -9    4.25    2.11
  -9  -2  -9    8.65    2.27
  11  -9  -9   10.17    1.67
   2 -11   9    8.13    2.55
  10  -9  -9   -0.19    1.06
  -9  -1  -9   -2.30    1.65
  -9  -1  -9   -0.04    1.70
  -9  -1  -9   -0.64    1.69
   1 -10   9   -1.05    1.85
   9   1   9   -2.64    2.00
   0   9  -9    1.85    1.40
  -9   0  -9    4.55    1.88
   9  -9  -9    2.53    0.96
  -9   0  -9    3.14    1.70
  -9   0  -9   -1.43    1.51
   9   0   9    2.38    1.48
   0  -9   9   -1.28    1.72
  -9   1  -9    6.64    1.92
   8  -9  -9    9.22    1.16
  -9   1  -9   10.12    2.12
   1   8  -9    9.07    1.78
  -9   1  -9   10.50    2.06
   9  -1   9    6.08    1.64
  -1  -8   9    8.50    2.33
  -9   2  -9    4.31    1.69
   2   7  -9    6.35    1.68
  -9   2  -9    8.92    1.98
   7  -9  -9    7.03    0.86
  -9   2  -9    3.47    1.67
  -2  -7   9    4.09    1.35
   9  -2   9    7.35    1.71
  -2  -7   9    6.51    2.12
  -9   3  -9    2.67    1.66
   3   6  -9    2.71    1.43
  -9   3  -9   -1.19    1.44
  -9   3  -9   -0.05    1.42
   6  -9  -9    1.66    0.45
  -3  -6   9    0.56    1.68
  -3  -6   9    0.87    1.04
   9  -3   9    0.88    1.43
  -9   4  -9    4.65    1.79
  -9   4  -9    5.77    1.77
   4   5  -9    5.94    1.64
   9  -4   9    3.80    1.55
  -4  -5   9    3.43    1.81
  -4  -5   9    2.81    1.15
  -9   5  -9   15.89    2.39
   5   4  -9   17.23    2.21
  -9   5  -9   13.74    2.19
   4  -9  -9   14.41    2.28
   9  -5   9   19.69    2.38
  -5  -4   9   16.79    1.82
  -5  -4   9   18.00    2.53
  -9   6  -9    9.28    2.01
  -9   6  -9   11.96    2.30
   6   3  -9   11.02    1.83
   3  -9  -9    9.62    1.91
   3  -9  -9   13.08    2.26
  -6  -3   9   12.37    1.54
  -6  -3   9    9.86    2.19
   9  -6   9    6.98    1.75
   2  -9  -9    1.09    1.73
   7   2  -9    1.25    1.31
  -9   7  -9    2.47    1.75
   2  -9  -9   -1.85    1.38
  -7  -2   9    0.78    0.88
   9  -7   9   -0.63    1.31
  -7  -2   9    1.32    1.82
   1  -9  -9    5.48    2.08
   1  -9  -9    5.86    1.86
   8   1  -9    6.23    1.65
  -8  -1   9   10.38    1.44
   9  -8   9    6.86    1.85
  -8  -1   9    7.32    2.21
   0  -9  -9    5.66    1.91
   9   0  -9    6.62    1.71
   0  -9  -9    4.06    2.05
  -9   0   9    6.79    2.24
   9  -9   9    7.04    1.89
  -9   0   9    6.91    1.44
  -1  -9  -9    4.34    1.95
  -1  -9  -9    3.03    1.94
  10  -1  -9    2.98    1.67
   9 -10   9    2.59    1.76
 -10   1   9    1.23    1.24
 -10   1   9    0.59    1.96
  -2  -9  -9    1.98    2.07
  -2  -9  -9    1.86    1.94
  11  -2  -9    2.38    1.61
   9 -11   9    6.08    2.00
 -11   2   9    1.39    2.17
  12  -3  -9    5.14    1.94
  -3  -9  -9    3.98    2.25
  -3  -9  -9    0.95    2.04
 -12   3   9   -1.98    2.20
   9 -12   9   -0.13    1.78
 -10  -1  -9    2.50    2.10
 -10  -1  -9   -0.33    1.87
  11 -10  -9   -0.85    1.09
 -10  -1  -9    1.40    1.82
   1 -11   9    1.99    2.24
  10 -10  -9    1.89    0.99
 -10   0  -9    2.74    1.95
 -10   0  -9    4.03    1.91
 -10   0  -9    1.48    1.99
   0 -10   9    1.13    2.10
  10   0   9   -0.60    1.50
 -10   1  -9   -1.46    1.60
   1   9  -9    1.70    1.36
 -10   1  -9   -0.76    1.68
 -10   1  -9   -0.88    1.64
   9 -10  -9   -0.50    0.81
  10  -1   9   -2.18    1.45
  -1  -9   9    1.37    2.15
 -10   2  -9    1.32    1.65
   2   8  -9    4.44    1.52
 -10   2  -9    4.45    1.77
   8 -10  -9    2.65    0.77
 -10   2  -9    2.05    1.68
  10  -2   9   -0.54    1.41
  -2  -8   9    2.66    1.95
  -2  -8   9    3.27    1.50
   3   7  -9    6.85    1.79
 -10   3  -9    4.72    1.86
 -10   3  -9    6.13    1.91
 -10   3  -9    7.43    1.94
   7 -10  -9    5.91    0.74
  -3  -7   9    8.24    1.62
  10  -3   9    4.89    1.66
  -3  -7   9    6.14    2.15
 -10   4  -9    0.63    1.52
   4   6  -9    2.17    1.42
 -10   4  -9    0.44    1.69
 -10   4  -9   -0.46    1.54
  -4  -6   9    3.51    1.31
  -4  -6   9    4.33    2.03
  10  -4   9    2.53    1.62
 -10   5  -9    0.28    1.57
 -10   5  -9    1.36    1.71
   5   5  -9    3.86    1.54
  -5  -5   9    3.19    1.23
  10  -5   9    2.17    1.52
  -5  -5   9    1.42    1.81
 -10   6  -9    1.80    1.92
   6   4  -9    2.33    1.46
 -10   6  -9    4.90    1.87
   4 -10  -9    2.99    1.97
  10  -6   9    2.45    1.60
  -6  -4   9    1.70    1.94
  -6  -4   9    0.91    1.06
 -10   7  -9   15.28    2.63
 -10   7  -9   10.06    2.24
   7   3  -9   14.12    2.08
   3 -10  -9   16.20    2.64
  -7  -3   9   15.59    2.67
  10  -7   9   11.14    2.09
  -7  -3   9   14.59    1.81
   2 -10  -9    6.05    1.99
 -10   8  -9    5.89    2.06
   8   2  -9    7.68    1.74
   2 -10  -9    3.86    2.02
  10  -8   9    4.03    1.83
  -8  -2   9    6.28    1.38
  -8  -2   9    4.57    2.19
   1 -10  -9    3.99    2.18
   9   1  -9    0.59    1.56
   1 -10  -9    3.76    1.94
  -9  -1   9    0.26    2.00
  10  -9   9    5.24    1.78
  -9  -1   9    1.24    1.16
   0 -10  -9   -0.04    1.87
   0 -10  -9    2.77    2.09
  10   0  -9    4.15    1.72
 -10   0   9    0.01    2.01
  10 -10   9    3.35    1.94
  -1 -10  -9    2.71    2.03
  11  -1  -9    1.74    1.78
  -1 -10  -9    5.77    2.47
 -11   1   9    1.73    2.22
  10 -11   9    5.86    2.13
 -11   1  -9    4.98    2.16
 -11   1  -9    5.42    2.10
  10 -11  -9    7.45    1.25
 -11   1  -9    7.96    2.40
  11  -1   9    7.45    1.88
  -1 -10   9    9.63    2.87
 -11   2  -9    2.96    1.97
   9 -11  -9    2.60    0.88
 -11   2  -9    3.99    2.01
 -11   2  -9    0.46    1.75
  11  -2   9    1.42    1.75
  -2  -9   9    1.55    2.17
   3   8  -9    9.88    1.96
 -11   3  -9    6.83    2.04
 -11   3  -9    6.06    2.01
 -11   3  -9    6.78    2.07
  -3  -8   9    5.51    1.65
  11  -3   9    6.89    1.90
  -3  -8   9    8.73    2.55
   4   7  -9   18.81    2.49
 -11   4  -9   14.55    2.43
 -11   4  -9   13.09    2.53
 -11   4  -9   18.29    2.63
  -4  -7   9   14.93    2.11
  -4  -7   9   17.28    2.96
  11  -4   9   16.42    2.26
 -11   5  -9   11.86    2.34
 -11   5  -9    6.13    2.12
   5   6  -9   14.99    2.24
  -5  -6   9   12.40    1.89
  -5  -6   9   13.85    2.74
  11  -5   9    7.45    1.86
 -11   6  -9   -0.50    1.77
   6   5  -9    1.43    1.49
 -11   6  -9    3.44    1.94
  -6  -5   9    2.29    2.10
  11  -6   9    1.45    1.70
  -6  -5   9    0.54    1.17
 -11   7  -9    3.21    1.97
   7   4  -9   -1.91    1.34
 -11   7  -9    3.55    2.11
   4 -11  -9    2.22    2.17
  -7  -4   9    4.65    1.40
  -7  -4   9    4.98    2.26
  11  -7   9    1.73    1.69
   3 -11  -9   26.10    3.38
 -11   8  -9   18.43    2.88
   8   3  -9   20.16    2.59
 -11   8  -9   24.54    3.14
  -8  -3   9   17.67    3.10
  11  -8   9   21.57    2.73
  -8  -3   9   20.34    2.24
 -11   9  -9    2.71    2.15
   2 -11  -9    4.46    2.24
   2 -11  -9    5.46    2.12
   9   2  -9    6.55    1.92
 -11   9  -9    6.20    2.47
  -9  -2   9    1.53    2.15
  11  -9   9    4.95    2.05
  10   1  -9    4.71    1.92
   1 -11  -9    4.50    2.27
   1 -11  -9    2.44    2.05
 -10  -1   9   -1.49    2.06
  11 -10   9   -0.04    1.90
 -12   3  -9    3.51    2.00
 -12   3  -9    5.39    2.18
 -12   3  -9    2.47    2.09
  12  -3   9    5.36    2.03
  -3  -9   9    5.29    2.51
  -3  -9   9    3.41    1.81
 -12   4  -9   12.58    2.40
 -12   4  -9    8.88    2.35
 -12   4  -9   13.98    2.62
  12  -4   9    7.84    2.13
  -4  -8   9   12.51    2.96
  -4  -8   9    9.34    1.97
 -12   5  -9   15.87    2.71
   5   7  -9   15.41    2.42
 -12   5  -9   16.38    2.65
 -12   5  -9   13.86    2.57
  -5  -7   9   15.21    3.04
  12  -5   9   14.21    2.34
  -5  -7   9   16.89    2.27
 -12   6  -9   11.53    2.48
   6   6  -9   16.24    2.42
 -12   6  -9    7.93    2.35
  -6  -6   9   14.16    2.08
  -6  -6   9    9.88    2.72
  12  -6   9    9.49    2.10
   7   5  -9   -0.10    1.41
 -12   7  -9   -2.83    1.81
 -12   7  -9   -3.31    1.76
  12  -7   9   -0.30    1.79
  -7  -5   9    1.71    2.32
  -7  -5   9    2.86    1.56
   4 -12  -9    6.98    2.73
   8   4  -9    5.97    1.96
 -12   8  -9    6.94    2.44
 -12   8  -9    6.06    2.29
  12  -8   9    4.36    2.05
  -8  -4   9    8.88    2.72
 -12   9  -9    3.10    2.36
   3 -12  -9    4.34    2.33
 -12   9  -9    8.21    2.77
   9   3  -9    6.70    2.09
  -9  -3   9    3.72    2.58
  12  -9   9    6.23    2.12
   0   0 -10    2.15    0.49
   0   0 -10    2.93    0.93
   0   0 -10    3.00    0.76
   0   0  10    2.13    0.41
  -1   0 -10   36.37    2.19
   1  -1 -10   40.07    2.31
  -1   0 -10   38.48    2.03
   0   1 -10   39.48    1.83
   1  -1 -10   36.83    2.16
  -1   0 -10   37.77    2.45
   1  -1 -10   39.60    1.78
   0   1 -10   33.51    2.24
  -1   1  10   35.47    1.69
   1   0  10   35.67    2.21
   0  -1  10   39.64    1.90
  -1   1 -10   25.49    1.77
   0  -1 -10   22.68    1.45
   0  -1 -10   24.35    1.93
   1   0 -10   21.28    1.65
   1   0 -10   24.96    1.87
   0  -1 -10   24.51    1.63
  -1   1 -10   24.52    1.51
  -1   1 -10   24.43    2.01
   0   1  10   20.34    1.11
  -1   0  10   21.69    1.39
   0   1  10   20.63    1.26
   2  -1 -10   38.68    2.18
  -1   2 -10   42.35    1.96
  -1   2 -10   34.79    2.29
  -1  -1 -10   34.88    2.46
  -1  -1 -10   34.75    2.11
   2  -1 -10   34.86    2.18
   1  -2  10   34.40    1.83
   1   1  10   33.66    1.89
   1   1  10   35.50    1.99
  -2  -1 -10    1.98    1.05
  -1   3 -10    2.03    0.88
  -2  -1 -10    2.50    0.84
   3  -2 -10    3.30    0.67
   3  -2 -10    2.63    0.75
  -2  -1 -10    1.74    0.49
  -1   3 -10    1.57    0.75
   2   1  10    2.35    0.71
   2   1  10    0.90    0.72
   1  -3  10    1.60    0.76
  -2   0 -10   96.56    4.78
   2  -2 -10  100.43    4.42
   0   2 -10   94.00    4.64
   0   2 -10  102.39    4.42
   0   2 -10   95.99    4.22
   2  -2 -10   93.34    4.39
  -2   0 -10   94.88    4.47
   2   0  10   95.81    4.46
  -2   2  10   97.34    4.36
   2   0  10   86.14    4.30
  -2   2  10   95.47    4.02
   0  -2  10  100.79    4.39
  -2   1 -10   86.87    4.37
   1   1 -10   80.56    4.12
   1  -2 -10   84.07    3.93
  -2   1 -10   84.97    4.10
  -2   1 -10   85.45    3.98
   1  -2 -10   92.06    4.11
   1  -2 -10   84.15    3.81
   2  -1  10   84.61    4.11
  -1  -1  10   84.75    3.87
  -1   2  10   80.77    3.72
  -1   2  10   78.55    3.77
  -1   2  10   88.78    4.01
  -1   2  10   83.04    3.65
   0  -2 -10   86.39    4.07
   0  -2 -10   77.80    3.73
   2   0 -10   79.12    3.98
  -2   2 -10   80.61    4.02
  -2   2 -10   84.32    3.54
   0  -2 -10   81.56    3.80
  -2   2 -10   82.08    3.81
   0   2  10   77.58    3.55
  -2   0  10   85.77    3.79
   0   2  10   74.37    3.50
   0   2  10   78.25    3.51
   0   2  10   74.14    3.77
  -2   3 -10    9.81    0.99
  -1  -2 -10    7.30    0.83
  -1  -2 -10    9.43    1.37
   3  -1 -10    7.83    1.04
  -1  -2 -10    8.26    1.13
  -2   3 -10    8.89    1.17
   3  -1 -10    9.88    0.98
   2  -3  10    9.55    0.96
   1   2  10    7.61    0.82
   1   2  10    7.00    0.95
   1   2  10    9.26    0.88
  -2   4 -10   21.03    1.86
   4  -2 -10   19.14    1.23
  -2  -2 -10   20.94    1.58
  -2  -2 -10   21.07    2.01
  -2  -2 -10   21.00    1.79
  -2  -2 -10   19.00    1.51
   4  -2 -10   21.06    1.65
   2   2  10   21.73    1.46
   2  -4  10   20.65    1.69
  -4   2  10   19.18    1.05
   2   2  10   16.51    1.35
  -4   2  10   21.40    1.07
  -3  -2 -10   44.57    2.88
  -3  -2 -10   48.12    3.04
  -3  -2 -10   42.50    2.55
  -3  -2 -10   44.56    2.63
  -2   5 -10   46.52    2.86
   5  -3 -10   44.58    2.53
   2  -5  10   45.88    2.92
   3   2  10   48.14    2.61
  -5   3  10   48.03    2.32
   3   2  10   40.46    2.50
  -5   3  10   52.80    2.39
   4  -3 -10   70.53    3.20
  -3  -1 -10   69.12    3.56
  -1   4 -10   78.95    3.68
   4  -3 -10   69.17    3.43
  -1   4 -10   74.67    3.85
  -3  -1 -10   71.03    3.88
  -3  -1 -10   67.85    3.36
  -3  -1 -10   70.87    3.74
  -1   4 -10   69.10    3.44
  -4   3  10   68.54    3.10
   1  -4  10   67.97    3.61
   3   1  10   70.30    3.45
   3  -3 -10   21.10    1.47
   3  -3 -10   20.33    1.43
  -3   0 -10   16.79    1.17
   0   3 -10   20.63    1.82
  -3   0 -10   24.07    2.09
   0   3 -10   19.63    1.32
  -3   0 -10   18.24    1.64
   0  -3  10   17.95    1.67
  -3   3  10   18.90    1.44
   3   0  10   16.77    1.51
  -3   3  10   18.71    1.17
  -3   3  10   16.47    1.52
   2  -3 -10   78.69    3.72
  -3   1 -10   84.35    3.96
   1   2 -10   81.38    4.08
   2  -3 -10   79.84    3.85
   1   2 -10   86.90    3.57
   2  -3 -10   78.99    3.71
  -3   1 -10   78.79    4.25
  -3   1 -10   81.33    3.45
  -3   1 -10   81.31    3.42
  -2   3  10   82.81    3.81
  -2   3  10   79.95    3.55
  -2   3  10   72.61    3.76
  -2   3  10   79.61    3.41
  -1  -2  10   77.26    3.88
   3  -1  10   79.17    3.94
   2   1 -10   77.03    3.82
  -3   2 -10   76.28    4.12
   1  -3 -10   77.43    3.72
  -3   2 -10   75.48    3.28
   1  -3 -10   70.45    3.39
  -3   2 -10   75.18    3.69
   1  -3 -10   72.19    3.55
  -1   3  10   69.85    3.03
  -1   3  10   67.29    3.04
  -1   3  10   72.77    3.30
  -1   3  10   62.54    3.34
  -2  -1  10   74.56    3.62
   3  -2  10   75.60    3.75
  -3   3 -10   29.71    1.70
  -3   3 -10   26.24    2.03
   0  -3 -10   23.77    1.87
   0  -3 -10   29.82    1.83
   3   0 -10   28.03    2.01
   0  -3 -10   31.89    2.18
  -3   0  10   28.56    2.03
   0   3  10   25.52    1.72
   0   3  10   27.40    1.39
   0   3  10   26.28    1.43
[truncated: 209,109 more chars]
